# Supplementary material
Source: publisher figshare collection journal article supplement (https://gsajournals.figshare.com/ndownloader/files/21211524)
Supplement: Supplementary file 1 [file 21211524]

## Sheet: Copy of Table S19
NBF_carcass_albopictus_vs_aegypti_deseq2									PBM_carcass_12hr_albopictus_vs_aegypti_deseq2									PBM_carcass_24hr_albopictus_vs_aegypti_deseq2									PBM_carcass_36hr_albopictus_vs_aegypti_deseq2									PBM_carcass_48hr_albopictus_vs_aegypti_deseq2									PBM_carcass_60hr_albopictus_vs_aegypti_deseq2
Ortholog name	baseMean	log2FoldChange	lfcSE	stat	pvalue	padj			Ortholog name	baseMean	log2FoldChange	lfcSE	stat	pvalue	padj			Ortholog name	baseMean	log2FoldChange	lfcSE	stat	pvalue	padj			Ortholog name	baseMean	log2FoldChange	lfcSE	stat	pvalue	padj			Ortholog name	baseMean	log2FoldChange	lfcSE	stat	pvalue	padj			Ortholog name	baseMean	log2FoldChange	lfcSE	stat
ort007782	80453.1	-12.9961	2.4525	-5.29911	1.16e-07	0.000447095			ort000847	1540.59	10.1663	2.53275	4.01395	5.97e-05	0.0492908			ort009622	16173	9.51445	2.34347	4.05998	4.91e-05	0.281519			ort009174	164836	-12.1167	2.6434	-4.58377	4.57e-06	0.00333363			ort009174	201801	-11.2117	2.54189	-4.41078	1.03e-05	0.0340922			ort009174	188438	-11.3633	2.54505	-4.46488
ort009174	87091.3	-11.7588	2.36464	-4.97274	6.6e-07	0.00126813			ort009481	2380.43	-9.46659	2.39444	-3.95357	7.7e-05	0.0492908			ort003986	8797.01	9.43653	2.34269	4.02807	5.62e-05	0.281519			ort009621	3307.34	-10.9366	2.63763	-4.14636	3.38e-05	0.0123297			ort007782	37305.3	-10.0165	2.43145	-4.11955	3.8e-05	0.047681			ort006984	3535.22	-11.3276	2.73776	-4.13756
ort003715	4147	-10.5753	2.33515	-4.52875	5.93e-06	0.00759864			ort006419	2118.23	-9.5614	2.41849	-3.95346	7.7e-05	0.0492908			ort008766	897.45	9.51274	2.49288	3.81596	0.000135652	0.381685			ort010089	5100.98	-10.1017	2.49603	-4.0471	5.19e-05	0.0126183			ort003715	3191.86	-9.92892	2.49354	-3.98186	6.84e-05	0.047681			ort009621	7561.93	-10.2541	2.48729	-4.12258
ort009622	3488.97	8.88507	2.2004	4.03794	5.39e-05	0.0517935			ort005396	1311.47	9.51828	2.44284	3.8964	9.76e-05	0.0492908			ort007782	13161.7	-8.32336	2.21981	-3.74958	0.000177134	0.381685			ort007782	21534.7	-9.55085	2.40739	-3.96731	7.27e-05	0.0132654			ort009621	5671.24	-9.53534	2.41097	-3.95498	7.65e-05	0.047681			ort005282	7834.16	-9.77411	2.42657	-4.02796
ort000847	1439.78	8.60747	2.22905	3.8615	0.000112695	0.072509			ort001848	15498.6	-8.70861	2.24496	-3.87918	0.000104807	0.0492908			ort005014	3019.03	8.14436	2.21627	3.67481	0.000238028	0.381685			ort003651	1470.92	-11.7679	2.98207	-3.94621	7.94e-05	NA			ort011317	203497	-9.17418	2.33831	-3.92343	8.73e-05	0.047681			ort007782	34877.7	-9.27076	2.34502	-3.95339
ort000933	4085.59	-8.09005	2.10157	-3.84953	0.000118345	0.072509			ort003715	4753.17	-8.80011	2.27462	-3.86883	0.000109358	0.0492908			ort009481	1546.79	-8.12988	2.25212	-3.60988	0.000306343	0.381685			ort000847	1929.45	10.0817	2.59508	3.88491	0.000102369	NA			ort000847	2024.24	9.78427	2.49905	3.91519	9.03e-05	0.047681			ort005014	4341.85	9.14847	2.35566	3.88361
ort001605	648.23	-8.57309	2.2428	-3.82249	0.000132109	0.072509			ort009730	1412.23	-9.29806	2.41958	-3.84284	0.00012162	0.0492908			ort002644	642.438	-9.03454	2.51908	-3.58644	0.000335227	0.381685			ort008484	1376.11	10.1791	2.67086	3.81117	0.000138311	NA			ort010089	1508.85	-11.4339	2.94387	-3.88396	0.000102769	0.047681			ort003709	1804	8.95138	2.37	3.77696
ort005469	778.113	-8.15723	2.17228	-3.75514	0.000173243	0.0784544			ort001605	1035.73	-9.26572	2.4563	-3.77223	0.000161793	0.0573758			ort006094	608.703	-9.95799	2.78743	-3.57247	0.000353632	0.381685			ort004186	985.433	9.11103	2.51189	3.62716	0.000286554	NA			ort003309	1527.37	-9.86551	2.56389	-3.84787	0.000119148	0.047681			ort009481	4854.36	-8.61211	2.30044	-3.74368
ort001848	4976.25	-7.72395	2.06594	-3.73872	0.000184963	0.0784544			ort006094	754.222	-10.3943	2.81322	-3.69481	0.000220048	0.0688011			ort000933	5180.55	-7.68423	2.15568	-3.56464	0.000364361	0.381685			ort005014	4525.38	8.24924	2.28417	3.61149	0.000304444	0.0444488			ort004843	1175	-11.0729	2.9194	-3.79287	0.000148915	0.047681			ort010247	689.526	9.88714	2.65382	3.72563
ort004586	716.995	-8.03878	2.16459	-3.71376	0.000204202	0.0784544			ort005014	1383.58	8.27089	2.25362	3.67004	0.000242514	0.0688011			ort006984	1875.97	-7.66936	2.17964	-3.51863	0.000433786	0.381685			ort002644	547.114	-10.3404	2.88735	-3.58129	0.000341897	NA			ort004186	2149.83	9.02198	2.38424	3.78401	0.00015432	0.047681			ort000888	864.212	8.62586	2.38688	3.61386
ort009231	58359.6	-7.36699	2.02493	-3.63814	0.000274609	0.0912623			ort000933	11805.3	-7.81821	2.14671	-3.64194	0.000270588	0.0697871			ort007870	373.735	8.8327	2.52346	3.50023	0.000464851	0.381685			ort009730	648.586	-8.58328	2.43805	-3.52055	0.000430649	NA			ort009579	1110.8	-10.9918	2.91407	-3.77198	0.000161959	0.047681			ort004227	2091.1	-8.24402	2.28957	-3.60069
ort003651	273.533	-9.65219	2.67181	-3.61261	0.000303133	0.0912623			ort004186	933.733	8.21796	2.2758	3.61103	0.000304986	0.0721038			ort011232	518.121	-8.72361	2.49591	-3.49517	0.000473763	0.381685			ort000888	578.643	9.92901	2.84741	3.48704	0.000488406	NA			ort001597	1999.91	8.91749	2.37439	3.75569	0.000172862	0.047681			ort004843	919.618	-8.79733	2.46688	-3.56618
ort005224	529.683	9.48841	2.62997	3.6078	0.0003088	0.0912623			ort009793	842.186	-8.22787	2.30311	-3.5725	0.000353594	0.0771652			ort003224	451.262	-9.52572	2.76006	-3.45128	0.000557941	0.381685			ort003647	2649.12	-7.60983	2.20534	-3.45064	0.00055925	NA			ort004227	9950.9	-8.45126	2.27043	-3.72232	0.0001974	0.04843			ort002615	3276.98	-7.82012	2.21228	-3.53487
ort000508	150.956	-11.239	3.1463	-3.57215	0.000354062	NA			ort006547	1120.3	7.82719	2.20583	3.54841	0.00038756	0.0785362			ort000872	319.528	9.60792	2.78693	3.44749	0.000565824	0.381685			ort004362	391.763	-9.85814	2.85975	-3.4472	0.000566424	NA			ort007870	817.634	10.7991	2.90849	3.71297	0.00020484	0.04843			ort007870	446.178	9.25833	2.62203	3.53098
ort009481	1440.67	-7.28687	2.04755	-3.55882	0.000372523	0.0969765			ort006206	1249.86	7.63626	2.17328	3.5137	0.000441906	0.0835792			ort008484	330.941	8.65685	2.51314	3.44463	0.000571842	0.381685			ort006547	1103.5	7.85566	2.29172	3.42784	0.000608403	NA			ort009753	945.876	-9.17324	2.50859	-3.65673	0.00025545	0.0553938			ort002876	5093.19	7.59624	2.16721	3.50507
ort008223	145.065	-11.1816	3.14695	-3.55316	0.000380633	NA			ort009701	1056.24	7.49963	2.16403	3.46558	0.000529088	0.0938139			ort008775	411.186	-9.39136	2.75216	-3.41236	0.000644022	0.402997			ort008775	368.467	-8.76797	2.57981	-3.39868	0.00067711	NA			ort006143	908.959	8.94983	2.45561	3.64464	0.000267764	0.0553938			ort010996	1185.76	7.7573	2.23401	3.47236
ort000734	698.81	-7.29762	2.08071	-3.50728	0.000452706	0.0969765			ort008484	1103.05	7.3549	2.14167	3.43419	0.000594333	0.0991837			ort007788	838.51	-7.24216	2.164	-3.34666	0.000817927	0.433793			ort009159	551.765	-8.02635	2.36371	-3.39566	0.000684636	NA			ort006327	736.126	-10.3979	2.87443	-3.61738	0.000297602	0.0579449			ort003444	499.837	8.42034	2.43093	3.46383
ort000888	524.026	7.8839	2.24923	3.50515	0.000456347	0.0969765			ort004362	391.232	-9.44639	2.76056	-3.42191	0.000621819	NA			ort002876	976.727	-7.17231	2.14342	-3.3462	0.000819267	0.433793			ort010557	550.736	8.26958	2.44244	3.38579	0.000709728	NA			ort009481	10158	-7.82163	2.19478	-3.56374	0.000365608	0.0672312			ort006143	427.981	8.61198	2.49586	3.4505
ort004612	787.992	7.47043	2.13162	3.50458	0.000457324	0.0969765			ort007870	314.009	9.45586	2.77797	3.40387	0.000664378	NA			ort003724	261.248	8.31475	2.49465	3.33304	0.000859039	0.433793			ort011432	4869.53	-7.33682	2.16715	-3.38547	0.000710561	0.0861615			ort000375	566.534	-9.01843	2.57964	-3.49601	0.000472271	NA			ort009545	597.441	-8.75997	2.5492	-3.43636
ort001165	670.806	7.50135	2.15287	3.48435	0.000493328	0.0969765			ort005910	808.707	-7.31715	2.16548	-3.379	0.000727491	0.113309			ort008655	245.556	9.22747	2.7705	3.33061	0.000866547	0.433793			ort010091	394.385	-8.27975	2.4595	-3.36644	0.000761454	NA			ort000436	2557.72	-7.66521	2.2004	-3.48356	0.000494796	0.0861988			ort009622	5122.46	7.24886	2.12338	3.41383
ort005995	296.642	-7.7644	2.23199	-3.47869	0.000503866	0.0969765			ort000550	1858.98	-6.98513	2.07435	-3.36738	0.000758858	0.113309			ort000026	348.002	-8.14776	2.45654	-3.31676	0.000910678	0.434176			ort009545	338.82	-8.64666	2.57109	-3.36304	0.000770901	NA			ort006984	4524.95	-7.42557	2.15533	-3.44522	0.000570594	0.0944333			ort003087	224.788	11.7142	3.43246	3.41278
ort006547	481.248	7.7605	2.24205	3.46134	0.000537498	0.0969765			ort002306	409.303	7.5105	2.25885	3.32493	0.000884408	NA			ort000912	315.085	-9.00666	2.7309	-3.29806	0.000973562	0.437879			ort000933	5434.98	-7.10436	2.13556	-3.32669	0.000878841	0.0861615			ort000933	4827.86	-7.29588	2.13748	-3.4133	0.000641804	0.0980638			ort003706	219.288	11.6785	3.43324	3.4016
ort002306	472.082	7.73263	2.24047	3.45134	0.00055781	0.0969765			ort001321	603.545	-7.25718	2.18372	-3.32331	0.000889546	0.126182			ort011432	2127.23	-6.75133	2.05413	-3.28672	0.00101363	0.437879			ort006945	802.738	-7.42689	2.23674	-3.32041	0.000898856	NA			ort011435	1491.26	-7.50271	2.20079	-3.4091	0.000651783	0.0980638			ort011432	7421.14	-7.17871	2.11385	-3.39604
ort004733	316.127	-7.53311	2.18743	-3.44382	0.000573551	0.0969765			ort011432	4208.68	-6.61319	2.00815	-3.29318	0.00099062	0.133828			ort002306	385.763	7.28742	2.2239	3.27687	0.00104965	0.437879			ort006143	380.9	9.32498	2.81047	3.31794	0.000906829	NA			ort004733	1127.8	-7.42116	2.20562	-3.36465	0.000766398	0.100982			ort000751	215.851	11.6557	3.43377	3.39443
ort003309	194.005	-9.15584	2.66191	-3.43957	0.000582636	NA			ort005492	1386.91	6.68007	2.03996	3.27461	0.00105808	0.136444			ort000888	246.985	7.64614	2.36243	3.23656	0.0012098	0.450108			ort001605	355.251	-8.12848	2.45054	-3.31701	0.000909867	NA			ort000267	20854.6	-7.04247	2.09331	-3.36428	0.000767449	0.100982			ort005012	534.248	7.92973	2.33915	3.39
ort006419	535.393	-7.15338	2.08242	-3.43513	0.00059228	0.0969765			ort003345	945.679	-6.7081	2.06581	-3.2472	0.00116545	0.143756			ort008818	435.714	-7.14505	2.21352	-3.22791	0.00124699	0.450108			ort009010	290.199	-8.42258	2.56063	-3.28927	0.00100449	NA			ort000888	1194.67	7.3382	2.18505	3.35837	0.000784037	0.100982			ort004186	533.561	7.92787	2.33905	3.38936
ort008182	3915.24	-6.77983	1.98022	-3.42378	0.000617561	0.0969765			ort000752	273.467	7.66646	2.36187	3.24593	0.00117067	NA			ort006293	596.481	6.797	2.10722	3.22557	0.00125722	0.450108			ort009354	268.431	-9.312	2.83405	-3.28576	0.00101709	NA			ort001067	410.613	-8.553	2.55233	-3.35105	0.000805058	NA			ort001551	278.77	9.58024	2.87666	3.33034
ort000601	1925.65	-6.81295	1.99331	-3.41791	0.000631029	0.0969765			ort010797	51957	6.25597	1.94267	3.22029	0.00128061	0.151378			ort005402	29766.9	-6.41237	1.9882	-3.22521	0.00125879	0.450108			ort009324	4531.13	6.95737	2.12218	3.2784	0.00104396	0.0861615			ort009622	5880.74	7.02071	2.09808	3.34625	0.000819128	0.100982			ort006356	180.793	11.4	3.44187	3.31215
ort003224	183.696	-9.07692	2.66103	-3.41106	0.00064711	NA			ort007116	21216	-6.21289	1.94566	-3.1932	0.00140707	0.159674			ort010988	1010.66	-6.58861	2.0576	-3.20209	0.00136435	0.471029			ort011317	1.36306e+06	-6.86727	2.09784	-3.27349	0.00106226	0.0861615			ort008745	5234.72	-7.02829	2.10132	-3.3447	0.000823717	0.100982			ort000121	180.105	11.3945	3.44209	3.31035
ort008745	1338.08	-6.80225	2.00066	-3.4	0.000673867	0.0995768			ort001606	316.801	6.87352	2.18741	3.14231	0.00167623	NA			ort006945	3914.19	-6.30434	1.98415	-3.17735	0.00148627	0.496018			ort003224	363.974	-7.74689	2.37375	-3.26356	0.00110022	NA			ort003444	633.945	7.61822	2.27869	3.34324	0.000828049	NA			ort009732	178.043	11.3779	3.44276	3.30487
ort001439	190.662	-8.12816	2.39692	-3.39109	0.000696145	NA			ort000125	284.438	6.98197	2.224	3.13938	0.00169306	NA			ort000550	335.321	-7.08874	2.24189	-3.16195	0.00156717	0.506146			ort005910	270.039	-8.3184	2.55449	-3.25639	0.00112839	NA			ort005852	612.739	-7.54166	2.28075	-3.30665	0.000944176	NA			ort010618	175.293	11.3554	3.4437	3.29745
ort003463	183.671	10.4051	3.0706	3.38861	0.000702483	NA			ort011244	6224.6	-6.03485	1.92698	-3.13177	0.00173757	0.186804			ort011593	145.908	8.47484	2.74937	3.08247	0.0020529	0.6423			ort005995	75662.5	-6.75161	2.08491	-3.23833	0.00120232	0.0877692			ort010618	198.434	11.1998	3.39728	3.29668	0.000978334	NA			ort000436	548.992	-7.63406	2.33347	-3.27154
ort002430	18379.7	-6.53135	1.94905	-3.35103	0.000805104	0.114563			ort002430	18020	-5.98557	1.91536	-3.12504	0.00177783	0.186804			ort003243	154.264	7.55159	2.4643	3.06439	0.00218112	0.66174			ort007608	230.483	-9.09174	2.82524	-3.21804	0.00129071	NA			ort007528	710.592	-7.33922	2.23124	-3.2893	0.00100437	0.118731			ort006704	327.294	7.80725	2.40021	3.25274
ort007870	168.054	10.2769	3.07002	3.3475	0.000815451	NA			ort009707	361.369	6.6463	2.1332	3.11565	0.0018354	NA			ort004077	2310.79	5.88541	1.93161	3.04689	0.00231221	0.667535			ort006094	135.784	-10.7737	3.3749	-3.1923	0.00141146	NA			ort011520	194.618	11.1718	3.39774	3.288	0.00100903	NA			ort009579	662.743	-7.319	2.25045	-3.25224
ort008925	321.961	-7.07115	2.12135	-3.33333	0.000858123	0.117747			ort009830	196.119	-8.44805	2.72598	-3.09909	0.00194117	NA			ort002012	1769.58	-5.85976	1.93448	-3.02912	0.00245266	0.667535			ort009830	135.784	-10.7737	3.3749	-3.1923	0.00141146	NA			ort000700	291.022	9.30735	2.8394	3.27793	0.00104571	NA			ort005869	235.662	-10.8638	3.34394	-3.24882
ort003024	89.8371	-10.4903	3.16795	-3.31139	0.000928334	NA			ort006984	1855.68	-5.86242	1.91984	-3.0536	0.00226112	0.2291			ort001165	280.208	6.40343	2.11936	3.0214	0.0025161	0.667535			ort008024	4522.31	6.63449	2.07917	3.19094	0.00141812	0.0886328			ort005995	20800.7	-6.69794	2.0482	-3.27015	0.0010749	0.122687			ort000933	3093.78	-6.59744	2.05097	-3.21675
ort002460	1046.47	6.65116	2.00978	3.30941	0.000934941	0.121017			ort000121	94.6286	10.1701	3.33801	3.04675	0.00231327	NA			ort001848	1604.79	-5.84128	1.93438	-3.01971	0.00253013	0.667535			ort010618	168.651	10.5945	3.32485	3.18645	0.00144029	NA			ort000912	435.55	-7.63467	2.34765	-3.25204	0.00114578	NA			ort001815	215.527	9.20849	2.87459	3.20341
ort004362	246.172	-7.17006	2.17245	-3.30045	0.000965301	0.121017			ort008655	93.5088	10.1529	3.33916	3.04056	0.00236135	NA			ort003444	186.871	6.82323	2.25987	3.0193	0.00253359	0.667535			ort000117	3821.17	-6.60742	2.07577	-3.18312	0.00145698	0.0886328			ort003724	466.672	7.39746	2.28086	3.24328	0.00118162	NA			ort011216	194.931	-10.5901	3.34855	-3.16259
ort008775	149.086	-8.77513	2.6597	-3.29929	0.000969283	NA			ort000588	211.201	6.87351	2.263	3.03735	0.00238667	NA			ort005910	399.719	-6.16283	2.05906	-2.99303	0.00276222	0.683973			ort001303	163.169	10.5468	3.32465	3.17231	0.00151231	NA			ort011413	286.029	8.28005	2.55631	3.23907	0.00119922	NA			ort010315	704.446	-6.81837	2.16172	-3.15413
ort009707	300.575	7.66596	2.32497	3.29723	0.000976448	0.121017			ort002857	376.707	6.24224	2.06306	3.02572	0.00248039	NA			ort011307	686.777	5.83062	1.95882	2.97659	0.00291471	0.683973			ort000752	877.523	6.81814	2.15264	3.16734	0.0015384	NA			ort005947	173.902	11.0094	3.40125	3.23687	0.00120849	NA			ort009648	130.611	10.9309	3.46806	3.15189
ort005572	84.6825	-10.4051	3.17254	-3.27972	0.00103909	NA			ort005224	299.216	6.37102	2.11269	3.0156	0.00256469	NA			ort003452	72.7493	9.91747	3.33252	2.97597	0.00292062	0.683973			ort007719	2117.38	-6.57852	2.08096	-3.1613	0.00157069	NA			ort006776	1772.76	-6.74675	2.08712	-3.23257	0.00122683	0.130689			ort010171	188.021	-10.538	3.34991	-3.14576
ort003087	143.61	10.0501	3.0706	3.27301	0.00106409	NA			ort001165	269.093	6.41106	2.13513	3.00265	0.00267636	NA			ort003909	1896.5	5.65903	1.9022	2.97499	0.00292995	0.683973			ort000125	382.257	7.32342	2.32043	3.15607	0.00159911	NA			ort001848	4986.52	-6.60514	2.04511	-3.22973	0.00123907	0.130689			ort006206	2527.64	6.33569	2.01499	3.14427
ort006384	83.2098	-10.3798	3.17401	-3.27023	0.00107458	NA			ort000601	5613.77	-5.60381	1.8675	-3.0007	0.00269362	0.26351			ort000125	276.949	6.21427	2.08947	2.9741	0.00293852	0.683973			ort009704	151.785	10.4425	3.32458	3.14099	0.00168377	NA			ort009159	1078.7	-6.8504	2.12471	-3.22415	0.00126346	0.130689			ort006547	876.985	6.51958	2.08176	3.13177
ort002577	277.829	7.55185	2.32031	3.25467	0.00113524	0.133042			ort003709	416.121	6.03498	2.02025	2.98724	0.00281509	NA			ort011520	71.5267	9.89302	3.3342	2.96714	0.00300587	0.683973			ort010171	119.774	-10.5927	3.37853	-3.13529	0.00171684	NA			ort006294	689.031	6.84014	2.14978	3.18179	0.00146366	NA			ort009753	768.737	-6.65333	2.12733	-3.12755
ort006206	1054.4	6.46747	1.98828	3.2528	0.00114273	0.133042			ort006742	93.3148	-9.82327	3.30574	-2.97158	0.00296271	NA			ort002430	9394.05	-5.47885	1.86376	-2.93967	0.00328562	0.731015			ort011520	140.402	10.33	3.32512	3.10666	0.00189214	NA			ort010007	2125.08	-6.52059	2.04948	-3.18158	0.00146472	0.146916			ort002198	714.225	-6.68503	2.13914	-3.1251
ort003452	135.122	9.96221	3.07142	3.24352	0.00118064	NA			ort007782	31157.1	-5.46721	1.84174	-2.9685	0.00299256	0.279545			ort006496	472.594	5.75571	1.96829	2.92422	0.00345326	0.7348			ort004583	3655.12	-6.33594	2.03963	-3.10642	0.00189366	0.0999739			ort000392	403.435	7.18604	2.26584	3.17147	0.00151668	NA			ort010890	123.736	10.8529	3.47402	3.12402
ort007986	681.587	-6.43102	1.98667	-3.23709	0.00120754	0.136131			ort009884	11796.6	5.45726	1.84231	2.96219	0.0030546	0.279545			ort009946	175.665	6.40788	2.1939	2.92077	0.00349166	0.7348			ort000115	5823.89	-6.30086	2.03073	-3.10275	0.00191731	0.0999739			ort000121	149.915	10.7953	3.40829	3.16736	0.0015383	NA			ort008484	507.922	6.73378	2.15855	3.11959
ort000751	132.067	9.92921	3.07182	3.23235	0.00122776	NA			ort002730	78.9505	9.90877	3.35807	2.95074	0.00317017	NA			ort009701	1258.02	5.48912	1.88666	2.90944	0.00362076	0.7348			ort011413	139.137	10.317	3.32523	3.10263	0.00191806	NA			ort002198	1518.33	-6.47316	2.05362	-3.15207	0.00162117	0.157826			ort003224	346.464	-7.38365	2.37546	-3.10831
ort008084	131.048	9.91804	3.07197	3.22856	0.00124415	NA			ort011267	78.9505	9.90877	3.35807	2.95074	0.00317017	NA			ort002916	780.531	5.54586	1.91032	2.90311	0.00369473	0.7348			ort009707	283.847	7.30894	2.37195	3.08141	0.00206025	NA			ort000508	247.726	-8.82461	2.80776	-3.14294	0.00167263	NA			ort002364	119.612	10.804	3.47802	3.10637
ort011432	2556.75	-6.21541	1.92913	-3.22187	0.00127356	0.136131			ort003979	337.398	5.95356	2.02954	2.93345	0.00335214	NA			ort009812	128.385	6.69553	2.3236	2.88154	0.00395742	0.7348			ort011538	588.195	6.61762	2.15015	3.07775	0.0020857	NA			ort006975	297.886	-7.50093	2.39829	-3.12761	0.00176233	NA			ort000161	171.655	-10.4066	3.3541	-3.10267
ort006496	358.745	6.91639	2.147	3.22142	0.00127556	0.136131			ort010988	2069.15	-5.42597	1.85427	-2.9262	0.00343135	0.304211			ort007608	75.6536	-9.39386	3.26787	-2.87461	0.00404522	0.7348			ort001165	271.198	7.24275	2.36767	3.05902	0.00222064	NA			ort002192	236.72	-8.7589	2.80638	-3.12107	0.00180196	NA			ort011435	681.494	-6.61668	2.13285	-3.10227
ort009148	126.259	-8.53478	2.66124	-3.20707	0.00134094	NA			ort011593	133.037	7.20925	2.46601	2.92345	0.00346181	NA			ort000441	1640.32	-5.33193	1.85981	-2.86693	0.0041448	0.7348			ort009355	2514.26	-6.1643	2.0208	-3.05043	0.00228511	NA			ort009050	1233.2	-6.37121	2.04734	-3.11195	0.00185856	0.175767			ort011267	118.237	10.7874	3.47943	3.10032
ort008534	123.24	9.82941	3.07336	3.19826	0.00138258	NA			ort010557	116.912	8.02703	2.75897	2.90943	0.0036209	NA			ort000577	126.155	-7.68193	2.68444	-2.86165	0.00421443	0.7348			ort009481	4765.93	-6.12196	2.00764	-3.04933	0.00229353	0.111618			ort003408	638.481	-6.59391	2.12381	-3.10475	0.00190438	NA			ort000116	1689.88	6.23216	2.01114	3.09882
ort007745	218.358	8.20712	2.58178	3.17887	0.00147853	NA			ort004843	196.46	-6.43817	2.2167	-2.9044	0.00367959	NA			ort000752	208.07	5.96809	2.08735	2.85917	0.00424751	0.7348			ort005947	122.693	10.1355	3.32766	3.04584	0.00232031	NA			ort008384	130.835	10.5989	3.41739	3.10145	0.00192573	NA			ort008360	174.969	8.90715	2.8776	3.09534
ort004186	213.266	8.17296	2.58098	3.16662	0.00154223	NA			ort006186	71.1114	9.7579	3.37237	2.89348	0.00380995	NA			ort007136	71.5642	-9.31369	3.27271	-2.84586	0.00442912	0.7348			ort003024	97.2425	-10.292	3.38909	-3.03681	0.00239094	NA			ort009148	276.791	-7.39436	2.39332	-3.08958	0.00200443	NA			ort002549	174.282	8.90146	2.8777	3.09325
ort006628	326848	-5.98313	1.89359	-3.15967	0.00157946	0.164008			ort003769	11849.7	5.21248	1.8064	2.88556	0.00390713	0.33097			ort005752	1004.68	-5.32496	1.87188	-2.84472	0.00444507	0.7348			ort003713	1742.19	6.10762	2.02239	3.02	0.00252776	NA			ort003706	125.384	10.5375	3.42079	3.08042	0.0020671	NA			ort004296	500.037	6.60302	2.14036	3.085
ort006229	600.926	-6.18484	1.96592	-3.14603	0.001655	0.166222			ort008878	123.518	7.1014	2.46623	2.87946	0.00398359	NA			ort008693	56.2432	9.54622	3.36363	2.83807	0.00453872	0.7348			ort005727	518.627	6.43405	2.13161	3.0184	0.00254112	NA			ort001321	417.924	-6.76174	2.19866	-3.0754	0.00210223	NA			ort011024	283.588	-7.6813	2.4962	-3.0772
ort009977	110.339	9.66988	3.07689	3.14275	0.00167369	NA			ort002916	573.554	5.48795	1.91031	2.87281	0.00406838	0.33097			ort008925	398.277	-5.50885	1.95217	-2.82191	0.00477393	0.7348			ort000121	114.682	10.0381	3.32976	3.01467	0.00257262	NA			ort008775	214.708	-8.61775	2.80397	-3.07341	0.00211627	NA			ort009704	112.738	10.7186	3.48549	3.07521
ort001464	355.747	6.57925	2.09505	3.14037	0.00168732	0.166222			ort003420	45292.9	-5.1398	1.79324	-2.86621	0.00415424	0.33097			ort011031	4515.89	-5.10906	1.81329	-2.81756	0.00483894	0.7348			ort002306	472.498	6.45187	2.14304	3.01061	0.00260725	NA			ort011267	122.658	10.5058	3.42266	3.06947	0.00214437	NA			ort009904	112.05	10.7098	3.4863	3.07197
ort010171	63.3278	-9.98584	3.20325	-3.11741	0.00182449	NA			ort006981	393.153	-5.61917	1.96641	-2.85757	0.00426895	NA			ort000392	112.491	6.50289	2.31985	2.80316	0.0050605	0.7348			ort001345	148.657	-8.45762	2.8094	-3.01048	0.00260839	NA			ort003452	119.387	10.4668	3.42506	3.05594	0.00224359	NA			ort005947	111.363	10.7009	3.48712	3.0687
ort001303	103.888	9.58298	3.0794	3.11196	0.00185852	NA			ort003452	66.632	9.66403	3.38236	2.85718	0.00427419	NA			ort010089	65.8391	-9.1934	3.28097	-2.80204	0.00507813	0.7348			ort001971	2263.61	-6.02854	2.00333	-3.00926	0.00261887	NA			ort009648	118.297	10.4535	3.42591	3.05132	0.00227837	NA			ort005091	109.988	10.683	3.4888	3.06209
ort009830	61.1187	-9.93461	3.20803	-3.0968	0.00195624	NA			ort003623	66.632	9.66403	3.38236	2.85718	0.00427419	NA			ort009504	158.345	5.98946	2.13767	2.80186	0.00508091	0.7348			ort006984	2209.23	-6.01112	2.00126	-3.00366	0.00266749	NA			ort000734	1959.19	-6.03455	1.98145	-3.04552	0.00232277	0.213566			ort008878	163.283	8.80721	2.87965	3.05843
ort008484	484.988	6.17351	2.00329	3.08168	0.00205836	0.197705			ort002266	245.913	-5.9481	2.08244	-2.85631	0.0042859	NA			ort003706	52.5751	9.44892	3.37391	2.80058	0.00510104	0.7348			ort009648	109.623	9.97301	3.33149	2.99356	0.00275741	NA			ort004711	200.95	-8.52196	2.80279	-3.04053	0.00236165	NA			ort008223	155.654	-10.2655	3.35985	-3.05533
ort002303	58.9096	-9.8815	3.21314	-3.07535	0.00210258	NA			ort004825	75.009	-9.50823	3.33014	-2.8552	0.00430095	NA			ort009884	5274.34	5.04573	1.80213	2.79988	0.00511222	0.7348			ort003724	203.988	7.41793	2.47833	2.99311	0.00276149	NA			ort007719	722.464	-6.18236	2.04955	-3.01645	0.00255755	0.225144			ort001165	249.978	7.09244	2.32764	3.04706
ort008187	308.556	6.37162	2.08363	3.05795	0.00222859	0.208836			ort005752	1188.41	-5.25939	1.84343	-2.85304	0.00433031	0.33097			ort010171	65.4302	-9.18441	3.28164	-2.79873	0.00513045	0.7348			ort007796	288.749	-6.59741	2.20689	-2.98946	0.00279473	NA			ort011538	749.222	6.12993	2.03547	3.01155	0.00259915	0.225144			ort003708	373.147	6.52787	2.16402	3.01655
ort009704	89.2894	9.36451	3.08771	3.03284	0.00242267	NA			ort010117	66.0721	9.65186	3.38372	2.85244	0.00433854	NA			ort002645	190.759	-5.94029	2.12263	-2.79855	0.00513334	0.7348			ort007966	87.7554	-10.1439	3.3966	-2.9865	0.00282194	NA			ort006384	119.692	-10.221	3.39841	-3.00758	0.00263333	NA			ort011663	226.894	-8.36214	2.7789	-3.00916
ort006984	1554.22	-5.70681	1.88392	-3.02921	0.00245191	0.224291			ort004711	157.056	-6.53128	2.29238	-2.84912	0.00438404	NA			ort003878	602.11	-5.26285	1.88439	-2.79287	0.00522429	0.7348			ort008925	568.513	-6.20765	2.07897	-2.98593	0.00282718	NA			ort005492	2209.01	5.86958	1.95304	3.00535	0.00265275	0.225144			ort011413	163.647	7.80724	2.59573	3.00772
ort004529	54.4914	-9.76903	3.22511	-3.02905	0.00245325	NA			ort004583	429.886	5.48699	1.93161	2.84063	0.0045025	NA			ort000121	51.3525	9.41497	3.37772	2.78737	0.00531375	0.7348			ort009622	1925.62	5.94141	1.99605	2.97658	0.00291483	NA			ort010171	199.661	-7.50872	2.51188	-2.98928	0.00279634	NA			ort002272	225.44	-8.35283	2.77881	-3.00591
ort008878	161.321	7.76864	2.57417	3.01792	0.00254514	NA			ort009463	538.275	-5.416	1.9072	-2.83977	0.00451463	NA			ort008878	139.596	6.07192	2.17874	2.7869	0.00532149	0.7348			ort000392	175.146	8.2015	2.76133	2.97013	0.00297675	NA			ort006419	614.981	-6.11902	2.05204	-2.98193	0.0028644	NA			ort000752	574.762	6.21446	2.06816	3.00482
ort000347	53.0186	-9.7295	3.22963	-3.01258	0.00259041	NA			ort001847	2209.51	-5.13755	1.80973	-2.83885	0.00452759	0.33097			ort010563	139.596	6.07192	2.17874	2.7869	0.00532149	0.7348			ort011267	102.455	9.87545	3.33459	2.96152	0.00306126	NA			ort002306	994.59	5.92991	1.98893	2.98145	0.00286887	0.23676			ort000912	245.765	-7.4737	2.49016	-3.00129
ort002877	280.717	6.23347	2.07639	3.00207	0.0026815	0.235704			ort001067	1377.54	5.17681	1.82502	2.83657	0.00456003	0.33097			ort009255	4872.06	4.97558	1.79195	2.77664	0.00549245	0.7348			ort004133	1162.84	-5.81906	1.98821	-2.92678	0.0034249	NA			ort009704	174.274	7.56227	2.53952	2.97784	0.00290287	NA			ort000375	358.385	-6.69021	2.23289	-2.9962
ort009884	4960.25	5.5793	1.85974	3.00005	0.00269937	0.235704			ort001065	3012.25	-5.10399	1.79994	-2.83564	0.00457344	0.33097			ort007967	62.5676	-9.11987	3.28664	-2.77484	0.00552297	0.7348			ort010333	247.836	-6.37452	2.19056	-2.90999	0.00361442	NA			ort000568	284.76	-6.69302	2.2488	-2.97626	0.00291785	NA			ort005856	280.275	-7.07575	2.36174	-2.99599
ort010618	82.4993	9.2504	3.09338	2.99039	0.00278623	NA			ort008961	2616.74	-5.09326	1.80025	-2.8292	0.00466648	0.33097			ort001065	1653.38	-5.0174	1.8118	-2.76929	0.00561788	0.7348			ort003706	91.9145	9.71883	3.34094	2.90901	0.0036258	NA			ort011432	7415.92	-5.68144	1.90991	-2.97471	0.00293268	0.23676			ort001605	394.349	-6.56387	2.19369	-2.99217
ort000667	226.515	-6.03821	2.03021	-2.97418	0.00293777	NA			ort000872	418.687	5.44805	1.92772	2.82616	0.00471099	NA			ort010213	140.055	-6.23578	2.25213	-2.76884	0.00562569	0.7348			ort009579	961.079	-5.73528	1.98208	-2.89357	0.00380884	NA			ort008693	101.397	10.2311	3.44214	2.97232	0.00295554	NA			ort006427	96.2394	10.4904	3.50869	2.98982
ort007401	531.05	5.76751	1.94419	2.96653	0.0030118	0.251835			ort005572	67.4188	-9.35432	3.34532	-2.79624	0.00517003	NA			ort003345	436.3	-5.27232	1.90648	-2.76547	0.00568406	0.7348			ort009759	497.809	5.88186	2.04642	2.87422	0.00405025	NA			ort009732	101.397	10.2311	3.44214	2.97232	0.00295554	NA			ort006294	396.56	6.3729	2.13165	2.98966
ort003769	4963.82	5.48725	1.84994	2.96618	0.0030152	0.251835			ort009791	123.902	-6.77658	2.42586	-2.79348	0.0052145	NA			ort000347	60.9318	-9.08165	3.28977	-2.76057	0.00577	0.7348			ort000912	452.296	-5.8727	2.04358	-2.87373	0.00405651	NA			ort001345	278.798	-6.6622	2.24708	-2.96483	0.00302854	NA			ort000125	175.009	7.31654	2.46326	2.97027
ort009545	127.277	-6.53481	2.20385	-2.96517	0.00302513	NA			ort006744	390.815	-5.32394	1.91896	-2.77438	0.00553064	NA			ort001815	118.179	-6.57973	2.38463	-2.75922	0.00579395	0.7348			ort006419	69.9672	-9.81712	3.41931	-2.87108	0.00409072	NA			ort010876	109.603	-10.094	3.40669	-2.96298	0.00304672	NA			ort008366	151.961	7.69985	2.59761	2.9642
ort009168	221.36	-6.00449	2.02883	-2.95958	0.0030806	NA			ort003224	64.2934	-9.28584	3.35281	-2.76957	0.00561307	NA			ort009446	116.952	-6.56451	2.38435	-2.75317	0.00590213	0.7348			ort001121	1948.18	5.5643	1.94016	2.86796	0.00413132	NA			ort010117	368.199	6.30903	2.13108	2.96048	0.00307162	NA			ort007963	135.099	8.53318	2.88823	2.95447
ort001065	3026.75	-5.47523	1.85056	-2.9587	0.00308944	0.252546			ort011234	156.276	-6.10375	2.2046	-2.76865	0.0056289	NA			ort003964	135.557	-6.18805	2.25039	-2.74977	0.00596374	0.7348			ort006206	1521.45	5.56723	1.946	2.86085	0.00422501	NA			ort005529	417.725	-6.24077	2.11078	-2.95661	0.00311042	NA			ort008693	90.0526	10.3945	3.51992	2.95305
ort005947	77.0673	9.15214	3.09902	2.95323	0.00314463	NA			ort005687	2339.26	-4.90427	1.7728	-2.7664	0.00566795	0.376928			ort009791	153.344	-5.94734	2.16902	-2.74195	0.00610764	0.7348			ort005572	66.4095	-9.74184	3.42586	-2.84362	0.00446043	NA			ort005014	2703.7	5.63878	1.91451	2.94529	0.00322655	0.254283			ort011538	1181.83	5.75699	1.95516	2.94452
ort009732	76.0488	9.13295	3.10009	2.94603	0.00321883	NA			ort003841	63.847	-9.27579	3.35395	-2.76563	0.00568133	NA			ort001606	283.888	5.31598	1.94126	2.73842	0.0061736	0.7348			ort009732	80.5306	9.52807	3.35114	2.84323	0.00446582	NA			ort005727	668.999	5.90167	2.00781	2.93936	0.00328893	NA			ort002306	615.44	5.94664	2.02192	2.94108
ort010996	136.877	7.53041	2.57296	2.92675	0.00342524	NA			ort009260	148.935	6.03812	2.18365	2.76515	0.0056897	NA			ort009648	47.0731	9.28944	3.39288	2.73793	0.00618281	0.7348			ort009352	2413.28	-5.45007	1.918	-2.84154	0.00448959	NA			ort008352	460.441	6.04297	2.06186	2.93084	0.00338049	NA			ort003408	494.564	-6.14857	2.09126	-2.94012
ort011663	45.6549	-9.51377	3.25714	-2.9209	0.00349026	NA			ort007815	5406.6	-4.84805	1.75493	-2.76253	0.00573558	0.376928			ort009479	440.205	5.1244	1.87494	2.73311	0.00627399	0.7348			ort002192	331.006	-5.8921	2.07436	-2.84045	0.00450502	NA			ort000315	28216.4	-5.47124	1.87342	-2.92045	0.00349523	0.269052			ort005132	2900.24	-5.62131	1.91234	-2.93949
ort000026	132.771	-6.27076	2.15244	-2.91333	0.00357595	NA			ort003878	758.647	-5.03876	1.82713	-2.75775	0.00582002	0.376928			ort003769	5298.47	4.82681	1.7686	2.72917	0.00634935	0.7348			ort010364	65.8166	-9.7289	3.42704	-2.83887	0.00452741	NA			ort009587	387.458	-6.13076	2.1016	-2.91719	0.00353202	NA			ort005492	2098.6	5.61994	1.91639	2.93257
ort000115	219.83	-5.72676	1.99441	-2.87141	0.00408648	NA			ort009255	3544.32	4.84456	1.75763	2.7563	0.0058459	0.376928			ort004187	298.091	-5.30862	1.94661	-2.72711	0.00638915	0.7348			ort006327	120.025	-7.14291	2.51617	-2.83881	0.00452826	NA			ort003345	1101.79	-5.63011	1.93995	-2.90219	0.00370564	0.278744			ort001699	86.6154	10.3384	3.52693	2.93126
ort010988	1100.79	-5.30481	1.84768	-2.87107	0.00409085	0.319374			ort006294	216.119	5.56695	2.02622	2.74745	0.00600605	NA			ort003534	279.487	-5.34199	1.9594	-2.72634	0.00640414	0.7348			ort009812	227.27	6.2414	2.20346	2.83255	0.0046178	NA			ort003647	153.256	-8.12986	2.80225	-2.90119	0.00371754	NA			ort010054	2194.02	5.5509	1.90505	2.91379
ort009049	562.853	5.45819	1.90221	2.86939	0.00411262	0.319374			ort000026	150.025	-6.04399	2.20291	-2.74364	0.00607614	NA			ort011538	422.679	5.11442	1.87603	2.7262	0.00640691	0.7348			ort009854	173.381	6.59197	2.3316	2.82722	0.00469537	NA			ort009931	97.2215	-9.92104	3.41999	-2.9009	0.00372097	NA			ort005870	114.922	-9.82779	3.38702	-2.90161
ort005492	1307.58	5.29854	1.84873	2.86605	0.00415635	0.319374			ort008925	237.21	-5.52575	2.01417	-2.74343	0.00608003	NA			ort010530	396.796	5.12669	1.88236	2.72355	0.00645849	0.7348			ort001439	130.032	7.77011	2.75311	2.8223	0.00476802	NA			ort006427	298.232	-6.26959	2.16352	-2.89787	0.00375704	NA			ort004667	395.361	-6.1475	2.12036	-2.89927
ort007740	65.5242	8.91805	3.11547	2.8625	0.00420307	NA			ort006596	462.486	-5.1256	1.87207	-2.73794	0.00618255	NA			ort001321	146.392	-5.8793	2.16581	-2.7146	0.00663561	0.746469			ort000347	63.4448	-9.67595	3.43202	-2.81932	0.0048126	NA			ort006981	1340.29	-5.56091	1.92145	-2.89412	0.00380222	0.278744			ort009352	1170.41	-5.61692	1.94025	-2.89495
ort005962	598.54	-5.32188	1.86977	-2.84628	0.00442336	0.333226			ort005999	263.26	5.36163	1.96324	2.73101	0.00631405	NA			ort009704	43.4051	9.1724	3.40846	2.69107	0.00712233	0.79232			ort006270	1590.02	-5.38725	1.91566	-2.81221	0.00492018	NA			ort002615	3334.53	-5.4264	1.87932	-2.88743	0.003884	0.278744			ort010557	280.669	6.25123	2.16227	2.89104
ort009730	171.684	-5.78624	2.03637	-2.84145	0.00449092	NA			ort000562	524.606	5.0255	1.84352	2.72604	0.00641	NA			ort001301	605.981	-4.90571	1.82694	-2.6852	0.00724862	0.797507			ort005155	75.4711	9.43446	3.3572	2.81021	0.00495087	NA			ort000752	1001.36	5.57055	1.93322	2.88149	0.00395799	0.278744			ort009707	312.33	6.14092	2.12741	2.88657
ort002329	39.0276	-9.2875	3.29198	-2.82125	0.00478375	NA			ort009704	110.526	6.34899	2.33049	2.72431	0.00644352	NA			ort007527	755.631	-4.82927	1.8046	-2.67609	0.00744875	0.806096			ort003309	100.036	-7.88416	2.80963	-2.80612	0.00501414	NA			ort002877	592.678	5.7238	1.98857	2.87835	0.00399756	NA			ort003345	563.867	-5.8477	2.02768	-2.88394
ort004711	39.0276	-9.2875	3.29198	-2.82125	0.00478375	NA			ort010519	709.533	-4.93917	1.81457	-2.72195	0.00648986	0.401841			ort011267	42.1824	9.13118	3.41437	2.67434	0.0074877	0.806096			ort005856	238.6	-5.95131	2.1235	-2.80259	0.00506934	NA			ort004586	660.987	-5.69253	1.97854	-2.87713	0.00401311	NA			ort008934	341.242	6.04486	2.09932	2.87943
ort004308	113.112	7.25364	2.5747	2.81728	0.00484329	NA			ort004819	1536.85	-4.80173	1.76493	-2.72064	0.00651557	0.401841			ort006143	101.895	5.93762	2.23013	2.66246	0.00775726	0.816421			ort002877	404.459	5.68567	2.03187	2.79824	0.00513817	NA			ort010091	185.531	-6.813	2.37313	-2.87089	0.00409313	NA			ort000576	1965.36	5.44831	1.89218	2.87938
ort009255	2185.05	5.11898	1.81832	2.81522	0.00487436	0.36014			ort002877	523.932	4.98168	1.83658	2.71248	0.00667817	NA			ort005224	355.225	4.96218	1.86408	2.662	0.00776781	0.816421			ort006294	426.133	5.65345	2.02197	2.79601	0.0051737	NA			ort000601	1360.82	-5.472	1.90702	-2.86939	0.00411265	0.283602			ort008040	108.376	-9.74318	3.39408	-2.87064
ort000706	130.484	6.45282	2.29449	2.81231	0.00491863	NA			ort005155	51.5138	9.29278	3.43082	2.70861	0.0067565	NA			ort006630	169.762	5.34029	2.01105	2.65547	0.0079198	0.816421			ort007673	161.575	6.48914	2.32709	2.78852	0.00529501	NA			ort011073	882.522	-5.54264	1.93684	-2.8617	0.00421374	0.284643			ort007966	287.219	6.14559	2.14115	2.87024
ort000121	59.0736	8.76854	3.12853	2.80276	0.00506671	NA			ort010996	941.25	4.78075	1.77511	2.69321	0.00707678	0.427166			ort006173	132.079	-5.72821	2.15927	-2.65284	0.0079817	0.816421			ort003910	702.649	-5.42138	1.94693	-2.78458	0.00535974	NA			ort003913	204.878	-6.53841	2.28969	-2.85559	0.00429572	NA			ort007796	344.122	-6.13979	2.14032	-2.86863
ort005199	58.3946	8.75186	3.13012	2.79601	0.0051738	NA			ort008692	354.068	5.06517	1.88134	2.69232	0.0070957	NA			ort002993	49.8905	-8.79322	3.31787	-2.65026	0.00804303	0.816421			ort003878	953.094	-5.35263	1.92412	-2.78186	0.00540482	NA			ort003420	27995.1	-5.25211	1.83978	-2.85475	0.00430706	0.285127			ort009214	115.851	8.31079	2.89868	2.8671
ort005034	57.3761	8.72647	3.1326	2.7857	0.00534126	NA			ort009276	170.432	5.5458	2.0645	2.68627	0.00722545	NA			ort011099	232.127	5.10755	1.92869	2.64819	0.00809232	0.816421			ort009587	1785.99	-5.27006	1.8955	-2.7803	0.0054308	NA			ort009545	404.227	-5.8083	2.04228	-2.84403	0.00445469	NA			ort002430	18834.2	-5.2745	1.84371	-2.86081
ort007673	173.037	5.85164	2.10135	2.78471	0.00535753	NA			ort003907	24775.4	4.57795	1.70685	2.6821	0.00731609	0.432412			ort005572	49.4816	-8.78135	3.31922	-2.64561	0.00815442	0.816421			ort005132	6279.85	-5.18674	1.86969	-2.77411	0.00553532	0.235223			ort000228	199.375	-6.4987	2.28832	-2.83995	0.00451207	NA			ort004733	703.279	-5.64823	1.97622	-2.8581
ort010089	36.8185	-9.20343	3.30663	-2.78333	0.0053804	NA			ort001098	54.4708	-9.04665	3.3828	-2.67431	0.00748831	NA			ort006206	1151.71	4.63447	1.75751	2.63695	0.00836558	0.829269			ort006742	106.98	-6.97568	2.51538	-2.77321	0.00555055	NA			ort009854	275.611	6.03949	2.12719	2.83919	0.00452289	NA			ort001457	7458.89	-5.25974	1.84585	-2.8495
ort008636	1174.32	5.04136	1.82217	2.76669	0.00566294	0.41051			ort004977	167.072	5.51646	2.06318	2.67376	0.00750061	NA			ort001286	280.094	-4.98756	1.89852	-2.62707	0.00861226	0.841735			ort001551	116.119	7.60605	2.75212	2.76371	0.00571488	NA			ort000032	86.2153	-9.74771	3.43607	-2.83687	0.00455576	NA			ort005727	969.415	5.4653	1.91991	2.84664
ort001883	54.66	8.65651	3.13975	2.75707	0.00583219	NA			ort006630	179.277	5.44673	2.03743	2.67333	0.0075103	NA			ort001551	63.3768	7.26653	2.76798	2.62521	0.00865948	0.841735			ort003452	68.7251	9.29937	3.3672	2.76175	0.00574917	NA			ort008878	231.082	6.14942	2.17729	2.82435	0.00473769	NA			ort000734	941.815	-5.48116	1.93024	-2.83962
ort011520	54.66	8.65651	3.13975	2.75707	0.00583219	NA			ort007091	6405.21	4.54065	1.70493	2.66325	0.0077391	0.44708			ort005727	348.707	4.82801	1.8436	2.6188	0.00882409	0.849488			ort002615	1319.48	-5.21582	1.89352	-2.75457	0.00587697	NA			ort007788	815.109	-5.42544	1.92242	-2.8222	0.00476957	0.300288			ort007673	369.506	5.793	2.04878	2.82754
ort003326	51369.9	-4.89193	1.77898	-2.74986	0.00596216	0.414535			ort003534	162.593	5.47638	2.06144	2.65658	0.00789378	NA			ort003623	62.1542	7.23824	2.76949	2.61357	0.00896024	0.85438			ort011232	539.774	-5.38104	1.9544	-2.75329	0.00589996	NA			ort005132	5217.26	-5.17367	1.83477	-2.81979	0.00480548	0.300288			ort011401	536.102	5.58907	1.97811	2.82547
ort002645	69.1614	-6.65611	2.42373	-2.74623	0.00602846	NA			ort005727	1762.66	4.58415	1.7263	2.65548	0.00791954	0.44708			ort002877	265.35	4.90201	1.87997	2.6075	0.00912067	0.855258			ort008745	8800.17	-5.1033	1.8554	-2.75051	0.00595029	0.235223			ort006356	1936.71	-5.24941	1.86175	-2.81961	0.00480824	0.300288			ort007917	231.502	-6.37832	2.2648	-2.81628
ort006186	100.211	7.07771	2.57786	2.74557	0.0060405	NA			ort010171	85.838	-7.2507	2.73567	-2.65043	0.00803885	NA			ort009784	181.961	-5.1781	1.98927	-2.60301	0.00924089	0.855258			ort009345	89.9559	-7.73025	2.81266	-2.74838	0.00598908	NA			ort003243	297.789	5.85876	2.08435	2.81083	0.00494135	NA			ort003452	70.8047	10.0476	3.56862	2.81554
ort000147	2988.88	-4.9068	1.78868	-2.74325	0.00608345	0.414535			ort007745	886.71	4.65142	1.75649	2.64813	0.00809386	0.44708			ort008817	45.8011	-8.66984	3.33258	-2.60154	0.00928056	0.855258			ort008358	15615.6	5.07851	1.85013	2.74495	0.00605207	0.235223			ort005469	725.424	-5.38972	1.92352	-2.80201	0.00507854	0.309738			ort005529	156.341	-7.82284	2.78045	-2.81352
ort006630	116.904	6.29236	2.29471	2.74211	0.00610459	NA			ort008181	46.4744	9.14425	3.45473	2.64688	0.00812377	NA			ort008692	124.519	5.40934	2.08043	2.6001	0.00931954	0.855258			ort004584	55.1436	-9.47364	3.45354	-2.74317	0.00608489	NA			ort003713	1384.92	5.21828	1.8652	2.79771	0.0051467	0.309738			ort009884	12286.5	5.10023	1.81794	2.8055
ort001971	870.7	-4.97558	1.81718	-2.73807	0.00618003	0.414535			ort008983	1261.59	4.58529	1.73426	2.64394	0.00819463	0.44708			ort009463	335.086	-4.79949	1.84921	-2.59543	0.00944732	0.855258			ort002430	11409	-5.02001	1.84167	-2.7258	0.00641455	0.235223			ort005155	112.759	7.93587	2.84051	2.79382	0.00520893	NA			ort005572	95.2832	-9.55743	3.41179	-2.8013
ort005014	606.372	5.05791	1.84932	2.73501	0.00623778	0.414535			ort006496	560.313	4.71597	1.78928	2.63569	0.00839672	NA			ort008085	69.2878	6.38741	2.46384	2.59246	0.00952927	0.855258			ort008627	3359.84	-5.04674	1.85251	-2.72427	0.00644446	0.235223			ort003400	9093.55	-5.04926	1.81124	-2.78774	0.00530772	0.310571			ort001848	1623.52	-5.21303	1.86425	-2.79631
ort008236	59053.1	4.85139	1.7745	2.73395	0.00625794	0.414535			ort002757	45.3545	9.10907	3.46079	2.63207	0.00848655	NA			ort005155	36.6803	8.92955	3.44626	2.59108	0.00956741	0.855258			ort008693	63.2439	9.17947	3.37755	2.71779	0.00657203	NA			ort002414	139.585	-6.9889	2.50749	-2.78721	0.00531639	NA			ort000628	377.097	-5.75101	2.05862	-2.79361
ort001946	204.725	5.50259	2.01407	2.73208	0.00629363	NA			ort007986	1751.46	-4.49302	1.71223	-2.62408	0.00868846	0.46303			ort006596	341.422	-4.7508	1.83933	-2.58289	0.0097976	0.864765			ort003243	142.18	6.30246	2.31991	2.71668	0.00659397	NA			ort002430	15755.8	-5.03053	1.80611	-2.78528	0.0053482	0.310571			ort002192	148.34	-7.74671	2.78189	-2.78469
ort003706	51.944	8.58298	3.14781	2.72665	0.00639811	NA			ort011538	1646.19	4.48127	1.71093	2.61921	0.00881341	0.46303			ort002493	586.15	4.56759	1.76958	2.58117	0.00984651	0.864765			ort003292	794.528	-5.13907	1.89732	-2.70859	0.00675691	NA			ort000347	77.9606	-9.60251	3.45173	-2.78194	0.00540344	NA			ort001883	99.3528	8.0884	2.91258	2.77706
ort010007	653.309	-4.98252	1.82761	-2.72624	0.00640599	0.41715			ort007673	80.9633	6.48648	2.48044	2.61505	0.00892141	NA			ort010333	243.905	-4.89187	1.89748	-2.57809	0.00993482	0.864934			ort000550	281.45	-5.44298	2.01768	-2.69764	0.00698328	NA			ort000026	762.172	-5.20107	1.88974	-2.75227	0.00591836	0.337755			ort003724	142.377	6.59799	2.38096	2.77115
ort002493	504.291	5.05491	1.85942	2.71854	0.00655703	0.419868			ort010604	293.482	-4.89874	1.87799	-2.6085	0.00909397	NA			ort000645	486.162	-4.57596	1.78465	-2.56407	0.0103452	0.876462			ort011469	361.655	-5.31632	1.97254	-2.69516	0.00703548	NA			ort010905	266.304	-5.73541	2.08693	-2.74826	0.00599127	NA			ort001067	143.612	-7.69976	2.78295	-2.76676
ort006742	33.1366	-9.05143	3.33562	-2.71356	0.00665637	NA			ort007136	48.6666	-8.8841	3.40697	-2.60762	0.00911729	NA			ort010996	334.241	4.6648	1.81992	2.56319	0.0103716	0.876462			ort010797	13432.4	4.89423	1.82168	2.68665	0.00721722	0.250884			ort008223	72.9161	-9.506	3.46317	-2.74488	0.00605329	NA			ort007379	1103.86	-5.18361	1.87461	-2.76516
ort010876	33.1366	-9.05143	3.33562	-2.71356	0.00665637	NA			ort006367	731.547	-4.56378	1.75183	-2.60515	0.00918332	0.473692			ort001702	822.168	4.44933	1.73692	2.56162	0.0104185	0.876462			ort002272	161.86	-5.75062	2.15148	-2.67286	0.00752074	NA			ort001165	385.955	5.43612	1.98062	2.74465	0.00605751	NA			ort002916	2501.85	5.02492	1.82133	2.75894
ort009812	93.4208	6.97571	2.58051	2.70323	0.00686698	NA			ort009636	47.7736	-8.85738	3.41125	-2.59652	0.0094173	NA			ort009904	34.8463	8.85555	3.45926	2.55995	0.0104687	0.876462			ort010876	48.6213	-9.29203	3.47664	-2.67271	0.0075242	NA			ort004275	72.4575	-9.4969	3.46432	-2.74134	0.00611882	NA			ort003665	182.651	6.14459	2.22936	2.75621
ort006143	93.0813	6.97041	2.58067	2.70101	0.00691286	NA			ort010099	449.121	4.63183	1.79005	2.58755	0.00966625	NA			ort003024	42.5296	-8.56293	3.34653	-2.55875	0.0105049	0.876462			ort000375	595.405	-5.0636	1.89824	-2.66752	0.00764137	NA			ort003974	71.9989	-9.48774	3.46548	-2.73778	0.00618551	NA			ort000100	63.9304	9.90025	3.59357	2.75499
ort001702	657.187	4.94831	1.8321	2.70089	0.00691543	0.435558			ort008182	2886.29	-4.31858	1.67549	-2.57751	0.00995157	0.496832			ort000063	97.9346	-5.71142	2.23836	-2.55161	0.0107226	0.887228			ort009669	1504.33	4.92227	1.84583	2.6667	0.00766011	NA			ort006206	2456.98	4.93148	1.80512	2.73194	0.00629634	0.353235			ort003085	533.522	-5.39631	1.95875	-2.75497
ort007240	193.182	5.41696	2.01067	2.69411	0.00705765	NA			ort009904	41.435	8.97867	3.48451	2.57674	0.00997366	NA			ort000426	124.102	-5.3074	2.08884	-2.54083	0.0110588	0.907549			ort010750	1062.66	-4.94966	1.85728	-2.66501	0.00769857	NA			ort011024	248.419	-5.63317	2.08016	-2.70804	0.00676816	NA			ort010750	986.916	-5.16234	1.87667	-2.75079
ort007901	492.785	-4.93326	1.83434	-2.6894	0.0071581	0.443572			ort007693	16793.1	4.26956	1.65715	2.57645	0.00998216	0.496832			ort000061	2366.95	-4.2604	1.68489	-2.52859	0.0114521	0.927918			ort002334	56.9196	9.02746	3.39268	2.66087	0.00779398	NA			ort002916	1790.55	4.8712	1.80174	2.70361	0.00685907	0.378392			ort003769	12341.4	4.89155	1.785	2.74036
ort000392	90.0258	6.92187	2.58217	2.68064	0.00734813	NA			ort002615	459.156	-4.57583	1.78164	-2.56832	0.0102191	NA			ort000571	80.5567	-6.01977	2.38184	-2.52736	0.0114924	0.927918			ort009904	56.9196	9.02746	3.39268	2.66087	0.00779398	NA			ort002272	245.667	-5.61677	2.07911	-2.70153	0.00690206	NA			ort005402	340.729	-5.60184	2.0472	-2.73633
ort008562	209.536	5.30925	1.98157	2.67931	0.00737747	NA			ort001195	74.2295	-7.0396	2.74624	-2.56336	0.0103664	NA			ort009259	40.076	-8.4772	3.35888	-2.52382	0.0116089	0.929826			ort003345	550.263	-5.05935	1.90176	-2.66035	0.00780585	NA			ort009812	217.28	5.69052	2.1065	2.70141	0.00690458	NA			ort006425	640.203	-5.24045	1.91719	-2.7334
ort008884	250.391	5.2009	1.9415	2.6788	0.00738866	0.450591			ort001702	938.081	4.36879	1.70781	2.55812	0.0105238	0.501005			ort008181	52.3727	6.98942	2.78541	2.5093	0.0120971	0.961239			ort004733	220.89	-5.41472	2.04244	-2.6511	0.00802299	NA			ort004798	286305	-4.72129	1.75307	-2.69316	0.00707783	0.384059			ort000550	378.472	-5.48797	2.01282	-2.72651
ort001977	83.8314	-5.92431	2.21528	-2.6743	0.00748858	NA			ort007842	7625.17	-4.22773	1.65275	-2.558	0.0105276	0.501005			ort008024	413.125	4.38968	1.75887	2.49574	0.0125695	0.980352			ort009753	971.607	-4.91361	1.85418	-2.65002	0.00804878	NA			ort007963	104.187	-7.57066	2.81553	-2.6889	0.00716886	NA			ort007387	4951.32	4.85411	1.78473	2.7198
ort004072	146.216	5.60408	2.09571	2.67408	0.00749356	NA			ort003150	258.096	-4.79744	1.87617	-2.55703	0.0105569	NA			ort005780	51.1501	6.95507	2.788	2.49465	0.0126082	0.980352			ort002827	20875.7	-4.76614	1.80032	-2.64738	0.00811188	0.269167			ort009904	60.5113	9.48641	3.52967	2.68761	0.00719644	NA			ort005695	116.578	6.72586	2.47493	2.7176
ort009066	442.784	4.9377	1.85331	2.66426	0.00771574	0.462596			ort008636	1785.34	4.28585	1.67694	2.55575	0.0105958	0.501005			ort010557	122.892	5.01748	2.01182	2.494	0.0126314	0.980352			ort008878	107.014	6.47958	2.45182	2.64277	0.00822311	NA			ort006589	59.421	9.46018	3.53389	2.67698	0.00742882	NA			ort010333	215.097	-5.94435	2.19632	-2.70651
ort009628	46.8515	8.43412	3.16584	2.6641	0.00771942	NA			ort002364	39.7552	8.91896	3.49626	2.551	0.0107414	NA			ort001714	126.35	-5.06373	2.03675	-2.48618	0.0129121	0.980762			ort004879	779.364	4.88593	1.86016	2.62662	0.00862387	NA			ort008925	1283.73	-4.81103	1.80188	-2.67	0.00758503	0.399188			ort001120	21715.7	18.3075	6.76644	2.70563
ort006961	181.299	5.32316	2.00721	2.65201	0.00800134	NA			ort000347	43.7553	-8.73063	3.43267	-2.54339	0.0109782	NA			ort006981	138.002	-4.96567	1.99946	-2.4835	0.0130097	0.980762			ort000628	281.529	-5.17371	1.97259	-2.6228	0.00872112	NA			ort003986	1131.54	4.8265	1.80806	2.66944	0.00759783	0.399188			ort003243	99.7164	7.08842	2.62228	2.70315
ort001075	2036.26	-4.68791	1.76788	-2.65171	0.00800846	0.462596			ort004939	39.1953	8.8985	3.5004	2.54214	0.0110177	NA			ort009854	128.803	4.93057	1.98695	2.48147	0.013084	0.980762			ort008223	44.4707	-9.1633	3.49518	-2.6217	0.00874926	NA			ort006903	842.893	-4.81621	1.82011	-2.64611	0.00814226	0.421107			ort009050	415.447	-5.29606	1.96832	-2.69065
ort004428	85.2727	6.84295	2.58494	2.64724	0.00811518	NA			ort009669	596.687	4.38601	1.73085	2.53403	0.011276	0.524428			ort006186	49.9274	6.91988	2.79075	2.47958	0.0131539	0.980762			ort004667	335.223	-5.06899	1.93827	-2.61521	0.00891723	NA			ort009707	692.829	4.8391	1.83329	2.63958	0.00830097	0.422711			ort009168	392.212	-5.31298	1.97816	-2.68583
ort003878	290.46	-4.93951	1.86984	-2.64168	0.00824965	0.462596			ort002334	38.6354	8.87774	3.50466	2.53312	0.0113052	NA			ort010364	36.8045	-8.35434	3.37797	-2.47318	0.0133916	0.980762			ort009884	8027.7	4.66334	1.78631	2.6106	0.00903847	0.286873			ort010333	265.646	-5.30767	2.01117	-2.6391	0.00831263	NA			ort000274	371.886	-5.34387	1.99025	-2.68503
ort006967	45.154	8.38088	3.17298	2.64133	0.00825813	NA			ort009812	71.4445	6.30389	2.48956	2.53213	0.0113371	NA			ort011248	135.549	-4.93895	1.99795	-2.47201	0.0134357	0.980762			ort011663	42.6918	-9.10441	3.50441	-2.59798	0.00937729	NA			ort003841	60.0755	-9.22654	3.50241	-2.63434	0.00843012	NA			ort000508	141.027	-6.66636	2.48493	-2.68271
ort008983	670.657	4.77932	1.81078	2.63938	0.00830587	0.462596			ort009295	261.232	4.67778	1.84912	2.52973	0.0114151	NA			ort009579	603.081	-4.22724	1.71423	-2.46596	0.0136645	0.980762			ort000605	92.578	-6.1737	2.37705	-2.59721	0.00939833	NA			ort010519	514.013	-4.87848	1.86233	-2.61956	0.00880436	NA			ort006031	76.3721	-9.23826	3.45034	-2.67749
ort000054	1436.49	-4.66926	1.77082	-2.63677	0.00836996	0.462596			ort005780	80.8499	5.89141	2.33994	2.51776	0.0118105	NA			ort000588	156.726	4.72109	1.91576	2.46434	0.0137266	0.980762			ort010054	1372.96	4.67892	1.80826	2.58752	0.00966702	NA			ort006534	35770.3	-4.48813	1.71488	-2.61716	0.00886642	0.438041			ort001065	1976.23	-4.79429	1.79115	-2.67666
ort006760	157.816	5.3876	2.0433	2.63672	0.00837118	NA			ort010300	41.5228	-8.65508	3.44655	-2.51123	0.0120312	NA			ort001121	1406.75	4.09637	1.66432	2.46129	0.0138438	0.980762			ort008692	263.214	5.0508	1.96799	2.56648	0.0102737	NA			ort005910	58.2412	-9.1818	3.50956	-2.61623	0.00889072	NA			ort010905	139.208	-6.64745	2.48522	-2.67479
ort009250	947.534	4.72126	1.7909	2.63625	0.00838274	0.462596			ort008085	148.368	5.01033	1.99647	2.50959	0.012087	NA			ort006349	97.3191	-5.27785	2.14542	-2.46006	0.0138916	0.980762			ort002493	1189.28	4.62728	1.80327	2.56605	0.0102865	NA			ort001476	53.4244	9.3067	3.56019	2.6141	0.0089462	NA			ort009082	1288.9	-4.84603	1.81308	-2.67282
ort000912	89.3255	-5.68985	2.15925	-2.63511	0.00841101	NA			ort003400	6113.9	-4.08394	1.62956	-2.50616	0.012205	0.540438			ort010604	35.9866	-8.32192	3.38341	-2.45962	0.0139084	0.980762			ort004296	465.463	4.81117	1.87517	2.56572	0.0102962	NA			ort007074	913.923	-4.67864	1.79278	-2.60971	0.00906185	0.438041			ort006652	83.542	7.83734	2.93283	2.67228
ort008312	516.064	4.81766	1.82874	2.63441	0.00842835	0.462596			ort004016	36.9556	8.81361	3.51822	2.50514	0.0122405	NA			ort004977	170.382	4.64617	1.89004	2.45824	0.0139619	0.980762			ort004336	40.3201	-9.02195	3.51789	-2.56459	0.0103297	NA			ort005429	346.964	-5.02224	1.9253	-2.60855	0.00909268	NA			ort003292	857.367	-4.87869	1.83767	-2.65482
ort003705	29.4548	-8.8815	3.37205	-2.63386	0.00844205	NA			ort007383	40.6299	-8.62371	3.45254	-2.49779	0.0124971	NA			ort004939	47.482	6.84682	2.79682	2.44808	0.0143621	0.980762			ort001593	1247.67	-4.60238	1.79647	-2.56191	0.0104099	NA			ort008727	57.324	-9.1589	3.51331	-2.60692	0.00913612	NA			ort000605	117.428	-7.4078	2.79256	-2.6527
ort003841	29.4548	-8.8815	3.37205	-2.63386	0.00844205	NA			ort004376	928.994	4.19106	1.67813	2.49746	0.0125087	0.540438			ort002441	676.058	-4.14919	1.69586	-2.44666	0.0144187	0.980762			ort009791	156.181	-5.32759	2.0816	-2.55937	0.0104861	NA			ort008513	1057.58	-4.63611	1.77927	-2.60563	0.00917062	0.438041			ort002526	327.193	-5.27289	1.99544	-2.64247
ort008040	29.4548	-8.8815	3.37205	-2.63386	0.00844205	NA			ort010694	36.3956	8.79158	3.52301	2.49548	0.0125788	NA			ort005999	203.605	4.50518	1.84182	2.44604	0.0144434	0.980762			ort001010	881.466	-4.63283	1.81138	-2.55763	0.0105389	NA			ort001605	930.147	-4.65816	1.78847	-2.60455	0.0091994	0.438041			ort003913	114.518	-7.37139	2.79414	-2.63816
ort008693	44.4749	8.35902	3.176	2.63193	0.00849017	NA			ort008025	9924.25	16.8819	6.76645	2.49495	0.0125976	0.540438			ort010107	35.1687	-8.28875	3.38912	-2.4457	0.0144573	0.980762			ort000734	1300.25	-4.56503	1.7893	-2.55129	0.0107325	NA			ort007796	473.942	-4.85689	1.86532	-2.60379	0.00922004	NA			ort009976	71.2806	-9.13872	3.46474	-2.63764
ort006280	282.137	4.95087	1.8937	2.61439	0.00893869	0.477075			ort009324	870.435	4.19396	1.681	2.49491	0.0125989	0.540438			ort006474	260.25	-4.41988	1.80753	-2.44526	0.0144749	0.980762			ort006964	39.1342	-8.97888	3.52541	-2.5469	0.0108684	NA			ort008636	3230.2	4.49051	1.72713	2.59998	0.00932299	0.438041			ort003501	188.912	-5.75383	2.19026	-2.62701
ort002272	329.315	-4.82747	1.84655	-2.61432	0.00894049	0.477075			ort001120	9652.12	16.8418	6.76645	2.48902	0.0128096	0.540438			ort007485	98.2314	5.05812	2.06892	2.44481	0.014493	0.980762			ort010117	90.5707	6.23596	2.45163	2.5436	0.0109716	NA			ort000115	891.452	-4.6413	1.78751	-2.59652	0.00941739	0.438041			ort008362	159.642	5.75141	2.19169	2.62419
ort009701	132.636	5.46041	2.09363	2.60811	0.00910442	NA			ort009159	271.498	-4.53874	1.8249	-2.48712	0.0128783	NA			ort001486	1817.58	-4.03442	1.65028	-2.44468	0.0144979	0.980762			ort003769	8085.28	4.43135	1.74802	2.53507	0.0112425	0.341959			ort009352	2198.61	-4.49727	1.73473	-2.59249	0.00952839	0.438041			ort007646	147.897	-6.1439	2.34297	-2.62227
ort009161	166.018	-5.0844	1.94995	-2.60745	0.00912204	NA			ort000607	3252.22	-4.04852	1.62846	-2.48611	0.0129149	0.540438			ort005391	547.45	4.15826	1.70413	2.4401	0.014683	0.983152			ort002364	45.114	8.69212	3.43466	2.53071	0.0113832	NA			ort005856	396.008	-4.8712	1.88456	-2.5848	0.00974356	NA			ort005469	683.082	-4.81892	1.84195	-2.6162
ort000752	150.687	5.31928	2.04167	2.60535	0.00917797	NA			ort005091	35.8357	8.76921	3.52795	2.48564	0.0129318	NA			ort004711	319.943	-4.31712	1.77007	-2.43896	0.0147296	0.983152			ort008448	37.9483	-8.93448	3.53342	-2.52857	0.0114529	NA			ort004487	115.366	-6.11974	2.36848	-2.58383	0.00977103	NA			ort002877	351.145	5.06538	1.9364	2.61588
ort002851	455.851	-4.69229	1.81011	-2.59227	0.00953446	0.498248			ort001864	2122.19	-4.06983	1.63773	-2.48504	0.0129537	0.540438			ort008406	54.0044	6.023	2.48091	2.42774	0.0151933	0.999867			ort000667	187.514	-5.05354	2.00289	-2.52313	0.0116317	NA			ort011663	85.8432	-7.28964	2.82967	-2.57614	0.00999093	NA			ort003744	50.8694	9.57054	3.65933	2.61538
ort009463	438.236	-4.6944	1.81249	-2.59003	0.00959665	0.498248			ort011420	537.652	-4.24823	1.71511	-2.47694	0.0132515	NA			ort008448	33.9419	-8.23753	3.39821	-2.42408	0.0153472	0.999867			ort003815	777.965	-4.54088	1.80042	-2.52212	0.0116648	NA			ort006374	8313.92	4.36515	1.69755	2.57143	0.0101279	0.459085			ort007486	50.8694	9.57054	3.65933	2.61538
ort009648	41.4194	8.25633	3.1909	2.58747	0.00966849	NA			ort011607	279.703	4.47262	1.80601	2.47652	0.013267	NA			ort010750	580.585	-4.10961	1.69571	-2.42354	0.01537	0.999867			ort010646	37.3554	-8.91176	3.53761	-2.51915	0.011764	NA			ort008627	2942.89	-4.39463	1.71209	-2.56682	0.0102635	0.459085			ort006975	164.949	-5.88231	2.25275	-2.61116
ort005328	110.171	5.6109	2.1703	2.58531	0.0097292	NA			ort005773	35.2758	8.74649	3.53287	2.47574	0.0132959	NA			ort007183	67.8796	-5.76859	2.3865	-2.41718	0.0156413	0.999867			ort004435	1033.3	-4.48155	1.78117	-2.51607	0.0118671	NA			ort002662	147.674	5.49191	2.15223	2.55173	0.0107191	NA			ort011456	85.9679	6.8727	2.63745	2.60581
ort006463	182.036	5.10077	1.97305	2.58522	0.00973157	NA			ort002803	34.7158	8.72341	3.53815	2.46553	0.0136812	NA			ort006725	218.34	-4.41424	1.82629	-2.41705	0.0156467	0.999867			ort009479	2425.27	4.39981	1.75173	2.51169	0.0120155	NA			ort002526	349.517	-4.81466	1.8879	-2.55027	0.0107639	NA			ort001233	237.161	-5.39656	2.07182	-2.60474
ort003400	1475.22	-4.50741	1.75168	-2.5732	0.0100764	0.512519			ort004902	34.7158	8.72341	3.53815	2.46553	0.0136812	NA			ort008223	33.533	-8.22004	3.40139	-2.41667	0.0156632	0.999867			ort004478	2123.23	-4.39163	1.75145	-2.50743	0.0121614	NA			ort007136	51.8209	-9.0133	3.53861	-2.54713	0.0108614	NA			ort006903	770.408	-4.68275	1.81093	-2.58583
ort003070	425.718	-4.65095	1.80895	-2.57108	0.0101383	0.512519			ort003280	96.894	-5.40123	2.19567	-2.45994	0.0138958	NA			ort009707	334.46	4.20736	1.7423	2.41483	0.0157425	0.999867			ort011248	303.283	-4.7369	1.89116	-2.50475	0.0122538	NA			ort011607	322.285	4.82181	1.89545	2.54389	0.0109625	NA			ort010117	159.318	5.57515	2.16075	2.58019
ort001606	211.008	4.94668	1.92843	2.56513	0.0103138	NA			ort011470	392.674	4.28192	1.74101	2.45944	0.0139153	NA			ort010876	33.124	-8.20234	3.40465	-2.40915	0.0159895	0.999867			ort003107	43.0059	8.62307	3.44501	2.50307	0.0123123	NA			ort001439	81.2573	-7.20992	2.83472	-2.54343	0.0109771	NA			ort008604	105.943	6.16644	2.39298	2.57688
ort003218	39.3824	8.18357	3.20274	2.55518	0.0106134	NA			ort009504	111.752	5.11919	2.0816	2.45926	0.0139225	NA			ort000412	584.67	-4.06267	1.68721	-2.40792	0.0160435	0.999867			ort007383	90.6278	-5.7207	2.28659	-2.50184	0.0123549	NA			ort007632	122.332	-5.78394	2.27555	-2.54178	0.0110291	NA			ort009867	3031.09	-4.43373	1.7222	-2.57447
ort010604	71.3131	-5.68682	2.22647	-2.55418	0.0106438	NA			ort001383	610.444	4.14805	1.68902	2.4559	0.0140533	0.577817			ort011234	89.1403	-5.14779	2.14322	-2.4019	0.0163103	0.999867			ort004691	79.5332	-5.95131	2.37937	-2.50121	0.0123769	NA			ort001121	2030.4	4.32072	1.70518	2.53388	0.0112809	0.497862			ort009812	147.956	5.63962	2.19079	2.57424
ort006995	826.331	4.51575	1.7708	2.55013	0.0107684	0.537299			ort009259	170.465	-4.73745	1.92919	-2.45566	0.0140624	NA			ort006745	32.7151	-8.18442	3.408	-2.40153	0.0163267	0.999867			ort011022	285.402	4.77154	1.90979	2.49847	0.0124731	NA			ort004939	82.6893	6.47821	2.56325	2.52734	0.0114929	NA			ort003026	102.517	-7.21066	2.80226	-2.57316
ort000426	160.467	-4.93118	1.93527	-2.54806	0.0108324	NA			ort007772	375.664	-4.27278	1.74557	-2.44778	0.0143739	NA			ort011339	1012.32	-3.95966	1.64949	-2.40053	0.0163713	0.999867			ort008636	1757.03	4.37771	1.75284	2.4975	0.0125072	NA			ort006800	252.607	-4.90163	1.94583	-2.51905	0.0117673	NA			ort003986	930.099	4.56018	1.77596	2.56773
ort004489	104.06	5.52683	2.17106	2.54569	0.0109063	NA			ort007987	71.6641	-5.97708	2.44529	-2.44432	0.0145124	NA			ort003028	648.759	4.00527	1.6704	2.39779	0.0164942	0.999867			ort006589	42.1626	8.59451	3.44946	2.49155	0.0127186	NA			ort006704	94.0508	6.07383	2.41146	2.51874	0.0117776	NA			ort003841	62.5524	-8.95028	3.49514	-2.56078
ort008089	25691.6	-4.37078	1.72023	-2.54082	0.0110594	0.539525			ort009837	576.958	-4.121	1.68887	-2.44009	0.0146834	0.59487			ort002460	803.258	3.96774	1.65622	2.39566	0.0165905	0.999867			ort005728	338.596	-4.63836	1.86461	-2.48758	0.0128617	NA			ort006059	81.0538	6.44907	2.56495	2.5143	0.0119268	NA			ort007632	62.1887	-8.94187	3.4966	-2.5573
ort005155	38.3639	8.14577	3.2089	2.53849	0.0111332	NA			ort004137	107.833	5.06617	2.08093	2.43457	0.0149096	NA			ort003647	1535.85	-3.90703	1.63106	-2.3954	0.0166021	0.999867			ort000400	1633.63	-4.3343	1.74586	-2.48262	0.013042	NA			ort002953	617.378	-4.46674	1.77726	-2.51327	0.0119618	NA			ort006995	2720.82	4.37492	1.7129	2.5541
ort005910	43.7853	-6.99958	2.75836	-2.53758	0.0111621	NA			ort004487	36.6115	-8.47347	3.48308	-2.43275	0.0149846	NA			ort006466	32.3061	-8.16627	3.41144	-2.39379	0.0166752	0.999867			ort001881	34.9836	-8.81713	3.55584	-2.47962	0.0131522	NA			ort011031	5401.96	-4.20095	1.67152	-2.51326	0.0119623	0.520988			ort002548	46.0574	9.42717	3.693	2.55271
ort004487	60.6644	-5.87184	2.31737	-2.53384	0.011282	NA			ort009102	36.6115	-8.47347	3.48308	-2.43275	0.0149846	NA			ort005088	55.0002	-6.47513	2.70928	-2.38998	0.0168491	0.999867			ort004275	34.9836	-8.81713	3.55584	-2.47962	0.0131522	NA			ort009405	149.768	5.31551	2.1154	2.51277	0.0119786	NA			ort011607	370.189	4.81162	1.88766	2.54899
ort002384	43867.4	-4.35219	1.71767	-2.53377	0.0112842	0.539525			ort001857	2825.14	-3.8988	1.60408	-2.43055	0.0150759	0.59487			ort011607	105.163	4.78519	2.0022	2.38996	0.0168502	0.999867			ort006180	390.168	-4.54546	1.8377	-2.47345	0.0133816	NA			ort000988	138.407	5.39626	2.15013	2.50973	0.0120823	NA			ort005155	68.4187	7.54783	2.96284	2.5475
ort003406	1161.72	4.42878	1.75045	2.53008	0.0114037	0.539525			ort001856	640.332	4.06228	1.67169	2.43004	0.0150972	0.59487			ort009010	158.85	-4.49961	1.88685	-2.38472	0.0170919	0.999867			ort005760	2038.85	-4.27823	1.73274	-2.46905	0.0135471	NA			ort011244	2441.47	-4.2272	1.68554	-2.50791	0.0121446	0.521868			ort008025	10340.2	17.2371	6.76645	2.54744
ort011267	37.6849	8.12001	3.21322	2.52706	0.0115021	NA			ort003611	61.3657	6.0815	2.50418	2.42854	0.0151598	NA			ort001464	423.943	4.05059	1.69916	2.38388	0.0171311	0.999867			ort006425	144.151	-5.0526	2.04651	-2.46888	0.0135536	NA			ort008934	585.002	4.44489	1.77559	2.50333	0.012303	NA			ort001597	61.0977	-8.91633	3.50111	-2.54671
ort009636	43.0489	-6.97491	2.76163	-2.52565	0.0115485	NA			ort009214	36.1651	-8.45577	3.48691	-2.425	0.0153084	NA			ort004249	906.806	3.91347	1.64309	2.38177	0.0172295	0.999867			ort010007	4752.02	-4.23057	1.71641	-2.46478	0.0137096	0.375687			ort008081	48.1521	-8.90736	3.55876	-2.50294	0.0123166	NA			ort003707	45.37	9.40548	3.69836	2.54315
ort005999	166.758	4.97045	1.96836	2.52517	0.0115644	NA			ort010333	161.982	-4.66097	1.92467	-2.4217	0.015448	NA			ort008182	1853.31	-3.85468	1.61884	-2.38115	0.0172589	0.999867			ort008286	2934.48	-4.2262	1.71946	-2.45787	0.0139765	0.375687			ort005248	11263.9	4.13581	1.6558	2.49777	0.0124977	0.521868			ort006190	45.37	9.40548	3.69836	2.54315
ort003458	277.838	4.69768	1.8616	2.52346	0.0116206	0.539525			ort006903	351.44	-4.21829	1.74191	-2.42165	0.0154504	NA			ort002058	31.4883	-8.12928	3.41857	-2.37798	0.0174079	0.999867			ort004977	154.843	4.98379	2.03558	2.44834	0.0143517	NA			ort003134	1446.23	4.24486	1.69982	2.49724	0.0125165	0.521868			ort005728	689.348	-4.55201	1.79558	-2.53512
ort009904	37.3454	8.10695	3.21544	2.52126	0.0116936	NA			ort008358	1183.68	3.93212	1.62579	2.41858	0.0155811	0.603885			ort006270	4417.38	-3.80963	1.6023	-2.3776	0.0174258	0.999867			ort008655	38.7896	8.47421	3.46929	2.44263	0.0145805	NA			ort010076	74.837	-7.09034	2.84322	-2.49377	0.0126394	NA			ort002953	406.115	-4.76191	1.87842	-2.53505
ort004446	25.0366	-8.64704	3.43071	-2.52048	0.0117195	NA			ort004667	170.578	-4.60799	1.90549	-2.41827	0.0155946	NA			ort000562	407.028	4.01443	1.69532	2.36795	0.0178872	0.999867			ort003501	172.519	-4.81896	1.97392	-2.44131	0.0146339	NA			ort009884	7160.59	4.13112	1.65706	2.49305	0.0126652	0.521868			ort009998	44.6826	9.38345	3.70388	2.53341
ort009102	25.0366	-8.64704	3.43071	-2.52048	0.0117195	NA			ort003772	4617.17	-3.83491	1.58821	-2.41462	0.0157517	0.603885			ort009174	85770.1	-13.0098	5.50474	-2.36339	0.0181085	0.999867			ort002953	295.653	-4.53478	1.85859	-2.4399	0.0146914	NA			ort007684	259.394	4.76985	1.91421	2.49181	0.0127092	NA			ort008182	1722.39	-4.33865	1.71788	-2.52558
ort003986	447.542	4.54291	1.80313	2.51947	0.0117533	0.539525			ort011307	232.449	4.37104	1.81048	2.4143	0.0157654	NA			ort005995	118804	-3.73376	1.58294	-2.35875	0.0183365	0.999867			ort003986	471.221	4.39749	1.80309	2.43886	0.0147336	NA			ort004977	240.487	4.81421	1.93323	2.49024	0.0127656	NA			ort004196	435.09	-4.66513	1.85402	-2.51623
ort003420	13813.5	-4.31915	1.71502	-2.51843	0.0117881	0.539525			ort001233	158.41	-4.62751	1.92275	-2.40671	0.0160967	NA			ort003468	25.0649	8.38021	3.56148	2.35301	0.018622	0.999867			ort005812	52.6005	-6.95128	2.8525	-2.43691	0.0148135	NA			ort010054	1976.94	4.18943	1.68244	2.4901	0.0127708	0.521868			ort009272	3836.84	-4.23745	1.68507	-2.51471
ort011031	2245.53	-4.35083	1.72776	-2.51819	0.011796	0.539525			ort007397	254.952	4.27751	1.78261	2.39958	0.0164139	NA			ort004450	181.394	4.2602	1.81347	2.3492	0.018814	0.999867			ort011244	854.322	-4.25259	1.74789	-2.43298	0.0149749	NA			ort007383	74.3784	-7.0814	2.8439	-2.49003	0.0127731	NA			ort005652	447.415	-4.6458	1.84776	-2.51428
ort003623	99.6466	5.46292	2.17191	2.51526	0.0118945	NA			ort010098	732.692	3.93053	1.64232	2.39328	0.0166983	0.631642			ort006804	2527.87	-3.75036	1.59652	-2.34908	0.0188197	0.999867			ort000466	100.365	-5.27324	2.16798	-2.43233	0.0150021	NA			ort000605	161.2	-5.16838	2.07888	-2.48613	0.012914	NA			ort006374	3795.25	4.21563	1.68072	2.50823
ort000063	42.3126	-6.94982	2.76503	-2.51347	0.0119549	NA			ort010000	30.7963	8.55057	3.58026	2.38826	0.0169285	NA			ort007182	140.245	-4.45551	1.90004	-2.34495	0.0190296	0.999867			ort006405	1518.93	-4.18286	1.72116	-2.43026	0.0150882	NA			ort004667	474.721	-4.45389	1.79418	-2.48241	0.0130496	NA			ort003815	960.824	-4.38121	1.74688	-2.50802
ort002326	115.661	5.25802	2.09232	2.51301	0.0119706	NA			ort005167	741.201	-3.90191	1.63777	-2.38246	0.0171975	0.63598			ort001098	29.8525	-8.05231	3.43404	-2.34485	0.0190345	0.999867			ort007693	22824	4.10795	1.69043	2.43012	0.0150938	0.375687			ort009230	1292.24	-4.21646	1.69859	-2.48233	0.0130527	0.526882			ort003468	64.2941	7.45764	2.97378	2.5078
ort008085	99.3071	5.45788	2.17199	2.51285	0.011976	NA			ort009784	221.825	-4.31109	1.81041	-2.38128	0.0172527	NA			ort009636	29.8525	-8.05231	3.43404	-2.34485	0.0190345	0.999867			ort004455	861.24	4.24009	1.74706	2.42698	0.015225	NA			ort000549	828.747	-4.26823	1.72534	-2.47385	0.0133666	0.531079			ort006059	74.2817	6.65997	2.65622	2.50731
ort007934	68.6371	6.52681	2.6004	2.50993	0.0120755	NA			ort006664	4422.34	3.72586	1.56905	2.3746	0.0175679	0.63598			ort005100	3203.87	-3.70598	1.58637	-2.33614	0.0194841	0.999867			ort002879	1584.81	-4.1686	1.7179	-2.42657	0.0152423	NA			ort006945	169.082	-5.06442	2.04854	-2.47221	0.0134281	NA			ort008692	460.561	4.57479	1.82531	2.5063
ort002188	43288.2	-4.28994	1.71041	-2.50813	0.0121372	0.543098			ort009174	92354.3	-13.0828	5.5179	-2.37098	0.0177412	0.63598			ort008636	1129	3.75001	1.60873	2.33104	0.0197513	0.999867			ort000026	232.815	-4.59088	1.89325	-2.42487	0.0153139	NA			ort006270	253.697	-4.72106	1.91233	-2.46875	0.0135587	NA			ort004275	57.0972	-8.81863	3.51928	-2.50581
ort011244	2180.45	-4.32106	1.72459	-2.50556	0.0122256	0.543098			ort004249	1003.74	3.80605	1.60845	2.36629	0.0179674	0.63598			ort008025	4166.89	15.7567	6.76646	2.32865	0.0198777	0.999867			ort005429	150.923	-4.84944	2.00138	-2.42305	0.015391	NA			ort003910	364.711	-4.51683	1.83003	-2.46817	0.0135806	NA			ort011224	42.6203	9.31528	3.72157	2.50305
ort006031	244.408	-4.62703	1.84732	-2.50472	0.0122547	NA			ort005507	1740.22	-3.75009	1.5852	-2.36569	0.0179963	0.63598			ort001345	29.0346	-8.01224	3.44244	-2.32748	0.0199395	0.999867			ort006548	539.036	-4.29426	1.77444	-2.42006	0.0155179	NA			ort002696	41.9763	8.95878	3.63105	2.46727	0.0136148	NA			ort005429	316.123	-4.79395	1.91537	-2.50288
ort009215	30276.1	-4.2795	1.70942	-2.50347	0.0122982	0.543098			ort007948	663.165	-3.86627	1.6366	-2.36238	0.0181581	0.63598			ort006374	4397.02	3.65656	1.575	2.32163	0.020253	0.999867			ort001133	354.592	-4.40132	1.81987	-2.41848	0.0155857	NA			ort005091	41.9763	8.95878	3.63105	2.46727	0.0136148	NA			ort007666	943.519	4.34095	1.73776	2.49801
ort000872	402.273	4.5079	1.80575	2.49641	0.0125457	0.54476			ort004162	6560.84	-3.6654	1.5559	-2.35581	0.0184821	0.636757			ort007211	1442.39	-3.70529	1.59662	-2.32071	0.0203025	0.999867			ort001120	16990	14.8058	6.12315	2.41801	0.0156056	0.375687			ort007379	1423.12	-4.15221	1.68414	-2.46548	0.0136829	0.531079			ort009854	331.33	4.68905	1.87963	2.49466
ort008022	221.308	4.71818	1.8902	2.49612	0.012556	NA			ort003430	80.623	5.13399	2.1811	2.35386	0.0185798	NA			ort007679	225.423	4.06883	1.75367	2.32018	0.0203313	0.999867			ort003400	11294	-4.07125	1.68529	-2.41576	0.0157026	0.375687			ort008499	547.387	4.34445	1.76223	2.46532	0.0136892	NA			ort008636	2107.73	4.21053	1.6893	2.49247
ort003431	667.515	-4.38168	1.75665	-2.49433	0.0126194	0.54476			ort005176	3081.23	-3.68101	1.56448	-2.35287	0.0186291	0.636757			ort004455	365.25	3.90201	1.68255	2.31911	0.0203889	0.999867			ort003962	31.4259	-8.6624	3.58832	-2.41405	0.0157761	NA			ort008779	1681.45	4.12308	1.6741	2.46286	0.0137832	0.531079			ort010876	55.2788	-8.77194	3.52818	-2.48625
ort010557	66.9395	6.49028	2.60269	2.49369	0.0126424	NA			ort006589	29.1165	8.46965	3.60158	2.35165	0.0186903	NA			ort001456	78.9168	-4.96677	2.1417	-2.31908	0.0203908	0.999867			ort007873	2844.48	-4.0948	1.69701	-2.41295	0.0158239	0.375687			ort002644	82.7196	-6.22624	2.52849	-2.46244	0.0137997	NA			ort011007	71.532	6.605	2.66172	2.48148
ort007271	112.266	5.2139	2.09234	2.49189	0.0127065	NA			ort001345	32.1467	-8.28584	3.52606	-2.34989	0.0187792	NA			ort006548	3810.15	-3.65285	1.57555	-2.31846	0.0204245	0.999867			ort009255	3950.03	4.07553	1.69111	2.40997	0.0159538	0.375687			ort006496	623.932	4.29383	1.74451	2.46133	0.0138421	NA			ort007732	128.708	5.43422	2.19096	2.48029
ort010117	66.6	6.48287	2.60303	2.4905	0.0127562	NA			ort005402	46438	-3.61949	1.54322	-2.34541	0.0190062	0.641913			ort004544	2194.85	-3.67304	1.58442	-2.31823	0.0204368	0.999867			ort007485	200.813	4.64683	1.93044	2.40714	0.0160782	NA			ort007666	1067.74	4.17668	1.69739	2.46065	0.0138686	0.531079			ort007397	177.635	5.08272	2.04925	2.48028
ort003444	111.926	5.20941	2.09235	2.48974	0.0127838	NA			ort008675	264.464	4.08315	1.74396	2.34131	0.0192162	NA			ort005948	369.327	3.89185	1.67999	2.31659	0.0205262	0.999867			ort006907	68.8603	-5.7398	2.38457	-2.40706	0.0160813	NA			ort008692	380.668	4.46321	1.81384	2.46064	0.0138689	NA			ort004092	53.8241	-8.73347	3.53587	-2.46996
ort009182	51876.8	-4.23544	1.70392	-2.4857	0.0129298	0.55196			ort009545	90.7567	-4.97344	2.12763	-2.33754	0.019411	NA			ort004057	381.866	-3.86945	1.6772	-2.30709	0.02105	0.999867			ort003444	155.857	4.81792	2.00298	2.40538	0.0161557	NA			ort001120	8584.43	16.6341	6.76645	2.45832	0.0139589	0.531079			ort000645	2841.38	4.11605	1.66724	2.46877
ort004934	79.5585	5.72846	2.3073	2.48276	0.0130369	NA			ort003468	27.9966	8.41307	3.61716	2.32588	0.0200251	NA			ort006118	80.5026	4.7614	2.0639	2.30699	0.0210551	0.999867			ort008715	221.815	4.58131	1.90505	2.40482	0.0161804	NA			ort003623	127.504	5.27495	2.14812	2.45561	0.0140645	NA			ort008655	39.8706	9.21906	3.74741	2.46012
ort011576	4002.41	-4.23366	1.70927	-2.47689	0.0132534	0.554378			ort000228	107.057	-4.71771	2.02872	-2.32546	0.0200474	NA			ort003562	76.8722	-4.92767	2.14162	-2.3009	0.021397	0.999867			ort009343	84.8392	5.54514	2.30695	2.40367	0.0162316	NA			ort005572	80.4267	-6.18513	2.53066	-2.44408	0.0145221	NA			ort004588	223.488	4.82084	1.95966	2.46003
ort009350	288.477	4.55364	1.83889	2.4763	0.0132751	0.554378			ort006059	44.6812	6.63038	2.85337	2.3237	0.0201417	NA			ort009931	27.8078	-7.94995	3.45601	-2.30033	0.0214296	0.999867			ort007474	1025.31	4.13696	1.72347	2.40037	0.0163784	NA			ort003763	1959.49	4.05169	1.65778	2.44405	0.0145234	0.546279			ort011307	1357.17	4.14997	1.69027	2.45521
ort011248	109.432	-4.96497	2.00631	-2.47468	0.0133355	NA			ort008822	277.877	-4.0101	1.72831	-2.32024	0.0203281	NA			ort008358	1961.67	3.62351	1.57644	2.29854	0.0215312	0.999867			ort010996	272.846	4.45993	1.85903	2.39906	0.0164371	NA			ort003266	139.101	-5.14774	2.11026	-2.43939	0.014712	NA			ort006183	683.614	-4.3014	1.75216	-2.45492
ort006367	764.2	-4.31045	1.74368	-2.47205	0.013434	0.554985			ort004840	724.696	-3.72491	1.60707	-2.31783	0.0204588	0.682842			ort003866	1310.73	-3.65187	1.58893	-2.29832	0.0215438	0.999867			ort009931	58.3586	-6.09178	2.53932	-2.39898	0.016441	NA			ort001502	867.855	4.14869	1.70081	2.43924	0.0147183	0.547389			ort004446	50.9147	-8.6533	3.55257	-2.43578
ort001207	450.75	-4.37606	1.77303	-2.46812	0.0135824	0.555143			ort005962	177.729	-4.23556	1.83034	-2.31408	0.0206632	NA			ort005492	702.8	3.71005	1.61537	2.29672	0.0216348	0.999867			ort006903	496.858	-4.24588	1.77038	-2.39829	0.0164719	NA			ort002197	68.4167	-6.95994	2.85372	-2.4389	0.0147319	NA			ort007266	95.5671	-6.09821	2.50375	-2.43562
ort007931	212.142	4.65478	1.88693	2.46686	0.0136305	NA			ort007527	1214.39	-3.64047	1.57368	-2.31335	0.0207035	0.682973			ort002004	254.104	-3.96585	1.72868	-2.29416	0.0217815	0.999867			ort007379	743.034	-4.16584	1.73773	-2.39729	0.0165167	NA			ort003906	39.7957	8.88181	3.64908	2.43399	0.0149335	NA			ort001239	218.13	-4.79941	1.97726	-2.42731
ort007066	33.9503	7.96945	3.24001	2.4597	0.0139055	NA			ort006140	1457.46	-3.60239	1.56225	-2.30589	0.0211167	0.686383			ort005835	56.4294	-5.49668	2.39647	-2.29366	0.0218101	0.999867			ort000568	237.216	-4.48813	1.87297	-2.39626	0.0165632	NA			ort000125	102.055	5.44319	2.24731	2.42209	0.0154313	NA			ort006589	37.8083	9.14244	3.76924	2.42554
ort007179	1262.45	4.243	1.72623	2.45795	0.0139732	0.558152			ort000912	182.754	-4.18577	1.81663	-2.30414	0.021215	NA			ort000667	129.204	-4.33157	1.89186	-2.28959	0.0220452	0.999867			ort001383	525.888	4.22567	1.76635	2.39231	0.0167425	NA			ort003709	295.227	4.45888	1.84105	2.42192	0.0154387	NA			ort008352	176.3	4.87273	2.01374	2.41974
ort003026	54.7735	-5.72182	2.33036	-2.45534	0.0140753	NA			ort001332	3829.35	-3.53827	1.53651	-2.30279	0.0212907	0.686383			ort004819	519.843	-3.74548	1.63665	-2.2885	0.0221083	0.999867			ort004302	143.215	-4.77112	1.99645	-2.38981	0.0168573	NA			ort003292	1128.81	-4.03563	1.6703	-2.41611	0.0156875	0.575725			ort000099	109.096	5.38729	2.23161	2.41409
ort006488	420.099	4.38834	1.78771	2.45472	0.0140993	0.558152			ort008577	369.654	-3.84325	1.6705	-2.30066	0.0214111	NA			ort003962	46.4124	-6.2272	2.72688	-2.28363	0.0223931	0.999867			ort003708	457.4	4.2311	1.77559	2.38293	0.0171756	NA			ort009102	41.7319	-8.70091	3.60254	-2.41522	0.0157259	NA			ort005760	1546.94	-4.01595	1.66393	-2.41353
ort011206	165.118	4.75643	1.9385	2.45366	0.0141409	NA			ort010563	141.641	4.33264	1.88325	2.30062	0.0214133	NA			ort003023	26.9899	-7.90688	3.46574	-2.28144	0.0225225	0.999867			ort005091	34.995	8.32569	3.49649	2.38116	0.0172583	NA			ort002326	172.232	4.80165	1.98908	2.414	0.0157783	NA			ort000347	48.7327	-8.5901	3.56641	-2.40862
ort003484	822.716	4.27156	1.74131	2.45307	0.0141643	0.558152			ort001596	26.8768	8.35418	3.63398	2.2989	0.0215103	NA			ort002326	95.7902	4.48697	1.96798	2.27998	0.0226087	0.999867			ort000161	1495.44	-4.0344	1.69548	-2.37951	0.0173358	NA			ort008406	80.4221	5.84435	2.42137	2.41365	0.0157936	NA			ort008952	73.958	6.06147	2.51714	2.40808
ort000607	4322.42	-4.17008	1.7013	-2.45111	0.0142415	0.558152			ort008088	81.6294	4.88122	2.12659	2.29533	0.0217142	NA			ort006563	55.2026	-5.46426	2.39803	-2.27864	0.0226883	0.999867			ort005224	258.932	4.3809	1.85035	2.3676	0.0179039	NA			ort003769	7240.11	3.89405	1.61388	2.41286	0.0158281	0.575725			ort000032	48.0053	-8.56841	3.57129	-2.39924
ort004871	38.6307	-6.81737	2.78411	-2.44867	0.0143384	NA			ort005728	754.178	-3.65592	1.59281	-2.29526	0.0217184	0.686448			ort003910	5260.4	-3.53813	1.55296	-2.27831	0.0227081	0.999867			ort004586	3194.41	-3.95475	1.67124	-2.36635	0.0179643	0.409811			ort007646	203.451	-4.68127	1.94053	-2.41237	0.0158493	NA			ort009544	63.2829	6.4263	2.68151	2.39652
ort001030	360.117	4.40798	1.80096	2.44757	0.0143824	0.558152			ort008024	520.393	3.72398	1.62296	2.29456	0.0217585	NA			ort009159	223.644	-3.96608	1.74235	-2.27628	0.0228292	0.999867			ort005999	248.22	4.39457	1.85753	2.36581	0.0179908	NA			ort001352	88.7679	-5.73541	2.37765	-2.41221	0.0158561	NA			ort004579	47.6416	-8.55744	3.57379	-2.3945
ort001509	105.136	5.1166	2.09279	2.44487	0.0144903	NA			ort002493	663.026	3.67242	1.60071	2.29424	0.0217766	0.686448			ort003841	26.581	-7.88486	3.47084	-2.27174	0.023102	0.999867			ort011607	197.19	4.50806	1.9075	2.36334	0.0181112	NA			ort007134	111.412	-5.31734	2.2068	-2.40952	0.0159735	NA			ort002414	104.255	-5.63087	2.35228	-2.39379
ort004544	1066.37	-4.19136	1.72068	-2.43588	0.0148556	0.560413			ort011552	58.4526	5.41409	2.36569	2.28858	0.0221036	NA			ort006340	26.581	-7.88486	3.47084	-2.27174	0.023102	0.999867			ort002414	136.693	-4.70135	1.99223	-2.35984	0.0182826	NA			ort008484	225.05	4.55686	1.89663	2.4026	0.016279	NA			ort004489	189.077	4.72046	1.9726	2.39302
ort008577	410.703	-4.31156	1.77024	-2.43559	0.0148676	0.560413			ort001227	818.827	-3.61989	1.58287	-2.28691	0.0222009	0.69053			ort009148	26.581	-7.88486	3.47084	-2.27174	0.023102	0.999867			ort002876	341.033	-4.2271	1.79224	-2.35856	0.0183461	NA			ort005971	107.965	5.25691	2.19195	2.39828	0.0164721	NA			ort004428	227.005	4.58302	1.91524	2.39292
ort005969	766.576	-4.21985	1.73276	-2.43533	0.0148782	0.560413			ort007485	156.979	4.212	1.842	2.28664	0.0222166	NA			ort009518	43.0003	5.68858	2.50611	2.26988	0.0232147	0.999867			ort010000	55.826	6.54145	2.78376	2.34986	0.0187806	NA			ort008025	6408.75	16.2124	6.76645	2.396	0.016575	0.596339			ort000426	614.151	-4.13852	1.73034	-2.39174
ort000414	22.0911	-8.46647	3.48176	-2.43166	0.0150298	NA			ort009173	26.3168	8.3238	3.6429	2.28494	0.0223165	NA			ort005945	265.99	3.85665	1.69946	2.26934	0.0232476	0.999867			ort001269	315.458	-4.22411	1.79811	-2.34919	0.0188141	NA			ort007080	40.3561	-8.65255	3.61371	-2.39437	0.016649	NA			ort008925	517.773	-4.19477	1.75386	-2.39174
ort001233	89.6076	-4.99961	2.05622	-2.43145	0.0150383	NA			ort005896	834.794	-3.60804	1.57995	-2.28364	0.0223929	0.69053			ort009477	3907.37	-3.51839	1.55117	-2.26822	0.0233157	0.999867			ort007870	210.181	4.40288	1.87941	2.34269	0.0191452	NA			ort000550	415.65	-4.21333	1.76193	-2.39131	0.0167884	NA			ort008627	3379.88	-3.87854	1.62284	-2.38997
ort011569	10241.4	4.08286	1.68805	2.41869	0.0155767	0.576251			ort001805	2630.64	3.48525	1.53053	2.27716	0.0227769	0.691768			ort009669	389.312	3.72345	1.64644	2.26151	0.0237277	0.999867			ort008177	1810	-3.90862	1.66983	-2.34073	0.0192461	NA			ort009798	1141.42	-3.95291	1.65466	-2.38895	0.0168965	0.60137			ort006405	1374.59	-3.95658	1.65691	-2.38793
ort000441	1135.13	-4.14392	1.71366	-2.41817	0.0155987	0.576251			ort009094	284.274	3.86088	1.69618	2.27623	0.0228325	NA			ort003529	783.323	-3.5939	1.59215	-2.25726	0.0239917	0.999867			ort000096	27.8683	-8.48907	3.62911	-2.33916	0.0193271	NA			ort001269	486.135	-4.13568	1.73438	-2.38453	0.0171009	NA			ort000027	75.6048	-6.76788	2.83479	-2.38743
ort000550	240.611	-4.40238	1.82111	-2.41741	0.0156315	NA			ort006219	79.3897	4.8397	2.1274	2.27493	0.0229099	NA			ort004628	81.1639	-4.67538	2.0713	-2.25722	0.0239943	0.999867			ort007587	27.8683	-8.48907	3.62911	-2.33916	0.0193271	NA			ort000274	583.478	-4.07367	1.70977	-2.38258	0.0171919	NA			ort006322	88.6572	-5.98829	2.50998	-2.38579
ort006219	101.062	5.05791	2.09319	2.41636	0.0156765	NA			ort009202	130.556	4.3137	1.89632	2.27477	0.0229197	NA			ort003651	4374.82	-15.2467	6.76648	-2.25327	0.0242423	0.999867			ort007917	146.43	-4.57328	1.95638	-2.33763	0.0194067	NA			ort009010	73.0892	-6.04513	2.53935	-2.38058	0.0172856	NA			ort008779	1194.25	3.95434	1.6597	2.38257
ort009952	31.5738	7.86475	3.26102	2.41174	0.0158764	NA			ort003913	74.1234	-5.00423	2.20326	-2.27128	0.0231299	NA			ort002260	1096.07	-3.53927	1.57255	-2.25065	0.0244075	0.999867			ort004286	33514.6	-3.83445	1.64166	-2.33571	0.0195063	0.41761			ort004293	39.4389	-8.61938	3.62139	-2.38013	0.0173064	NA			ort002857	446.041	4.18298	1.75959	2.37725
ort004187	66.498	-5.25447	2.17911	-2.41129	0.0158964	NA			ort008654	1350.74	-3.51532	1.54811	-2.27072	0.0231637	0.691768			ort001977	43.9588	-6.14777	2.73358	-2.24898	0.0245139	0.999867			ort000591	1086.31	-3.92637	1.68336	-2.33245	0.0196768	NA			ort010750	1478.89	-3.86697	1.63072	-2.37133	0.0177244	0.624126			ort002303	45.8232	-8.50129	3.58688	-2.37011
ort001430	470.35	4.24494	1.76266	2.40825	0.016029	0.586508			ort009343	78.8297	4.82913	2.12763	2.26972	0.0232244	NA			ort008675	225.634	3.84061	1.71267	2.24247	0.024931	0.999867			ort002208	859.276	-3.94815	1.69406	-2.33059	0.0197749	NA			ort005540	61.0793	-6.79488	2.86922	-2.3682	0.0178748	NA			ort007745	294.289	4.34304	1.83405	2.368
ort001195	21.3547	-8.41756	3.49689	-2.40715	0.0160774	NA			ort010054	536.957	3.64533	1.60683	2.26865	0.0232898	NA			ort007383	25.3542	-7.81668	3.48712	-2.24159	0.0249879	0.999867			ort008817	285.731	-4.19867	1.80237	-2.32953	0.0198312	NA			ort008040	71.7134	-6.01729	2.54127	-2.36783	0.0178928	NA			ort007206	109.46	5.19465	2.19439	2.36724
ort004836	71.4104	5.56947	2.31477	2.40606	0.0161258	NA			ort001121	1857.13	3.48055	1.53479	2.26777	0.0233432	0.691768			ort005248	3805.11	-3.44035	1.53713	-2.23817	0.0252101	0.999867			ort004939	53.7179	6.4853	2.7877	2.3264	0.0199973	NA			ort008181	54.9733	6.89323	2.91834	2.36204	0.0181747	NA			ort004559	210.09	-4.6128	1.94957	-2.36607
ort006279	127.318	4.79787	1.99411	2.40602	0.0161275	NA			ort006463	237.027	3.91525	1.72666	2.26752	0.0233584	NA			ort002575	255.529	-3.79988	1.69778	-2.23815	0.0252114	0.999867			ort004489	116.725	4.7614	2.05128	2.32119	0.0202768	NA			ort002364	35.4346	8.71436	3.69136	2.36074	0.0182383	NA			ort010646	45.4596	-8.4898	3.58962	-2.3651
ort010783	99.3644	5.03273	2.0935	2.40398	0.0162178	NA			ort009518	56.7728	5.37102	2.36894	2.26726	0.0233741	NA			ort006140	363.662	-3.68187	1.64655	-2.23612	0.0253439	0.999867			ort011401	74.2986	5.34935	2.30878	2.31696	0.0205061	NA			ort004038	35.4346	8.71436	3.69136	2.36074	0.0182383	NA			ort011248	275.675	-4.41135	1.86563	-2.36453
ort007948	524.549	-4.17587	1.74152	-2.39783	0.0164925	0.597774			ort011617	667.271	3.58445	1.58438	2.26237	0.0236744	0.691768			ort011575	47.6886	5.24303	2.34837	2.23263	0.0255734	0.999867			ort009230	7002.04	-3.79224	1.63728	-2.31618	0.0205484	0.41761			ort000491	70.7962	-5.99843	2.5426	-2.35917	0.0183159	NA			ort008775	85.7478	-5.93938	2.51311	-2.36335
ort004455	406.634	4.22665	1.76929	2.38889	0.0168992	0.603381			ort005474	847.196	-3.5371	1.56638	-2.25814	0.0239367	0.691768			ort003324	404.134	-3.64281	1.63231	-2.23168	0.0256358	0.999867			ort007818	3895.56	3.80381	1.64287	2.31534	0.0205941	0.41761			ort007587	38.0631	-8.56816	3.6339	-2.35784	0.0183817	NA			ort001596	34.3712	9.00494	3.81102	2.36287
ort000904	39178.5	-4.00227	1.67631	-2.38755	0.0169613	0.603381			ort009149	1026.29	-3.50895	1.55454	-2.25723	0.023994	0.691768			ort008770	1268.17	-3.46733	1.55611	-2.2282	0.0258671	0.999867			ort008025	5586.97	15.6438	6.76645	2.31197	0.0207795	0.41761			ort006425	159.625	-4.67912	1.98742	-2.35437	0.0185542	NA			ort000633	327.118	-4.29933	1.82119	-2.36073
ort001227	205.38	-4.3649	1.8327	-2.38168	0.0172338	NA			ort008384	25.197	8.26107	3.66187	2.25597	0.0240726	NA			ort003913	42.3231	-6.09227	2.73867	-2.22453	0.0261126	0.999867			ort007486	31.2003	8.1601	3.53059	2.31126	0.0208185	NA			ort006190	92.2422	5.29381	2.25018	2.35262	0.0186419	NA			ort002644	44.7322	-8.46653	3.59523	-2.35493
ort007987	20.6183	-8.36693	3.51306	-2.38167	0.0172345	NA			ort004781	1673.2	-3.45322	1.53199	-2.25407	0.0241916	0.691768			ort011428	42.3231	-6.09227	2.73867	-2.22453	0.0261126	0.999867			ort010716	52.0314	6.43876	2.79117	2.30683	0.0210642	NA			ort007486	34.8894	8.69199	3.69739	2.35084	0.0187309	NA			ort007967	68.4586	5.94826	2.52796	2.35299
ort008406	56.4149	6.24051	2.6213	2.38069	0.0172803	NA			ort011031	2429.88	-3.41911	1.51957	-2.25005	0.0244455	0.691768			ort007387	225.887	-3.78446	1.7078	-2.21598	0.0266927	0.999867			ort000315	58836.3	-3.74664	1.62544	-2.305	0.0211665	0.41761			ort007485	242.607	4.33349	1.84416	2.34985	0.0187812	NA			ort001121	2246.88	3.7957	1.61369	2.35218
ort001307	424.465	-4.16534	1.7507	-2.37924	0.0173482	0.607734			ort002460	842.139	3.5018	1.55941	2.24559	0.0247301	0.691768			ort008983	660.428	3.48989	1.57781	2.21186	0.0269765	0.999867			ort002974	50.6504	-5.88419	2.55324	-2.30459	0.0211894	NA			ort004286	3545.4	-3.72922	1.58903	-2.34686	0.0189325	0.653388			ort011105	1152.95	-3.87524	1.64839	-2.35092
ort010660	574.133	4.13453	1.73855	2.37814	0.0174	0.607734			ort011401	69.4243	4.9116	2.18827	2.24451	0.0247994	NA			ort010277	152.707	-3.96832	1.79417	-2.21178	0.0269817	0.999867			ort001606	248.734	4.17534	1.8172	2.29767	0.0215803	NA			ort004003	254.972	4.2922	1.8295	2.34611	0.0189706	NA			ort001573	340.858	-4.23523	1.80422	-2.3474
ort001219	14846.6	-3.97066	1.6735	-2.37267	0.0176599	0.608265			ort008312	621.924	3.54388	1.58034	2.24248	0.0249302	0.691768			ort009260	175.9	3.84419	1.74267	2.20591	0.02739	0.999867			ort003150	26.0895	-8.39391	3.65361	-2.29743	0.0215942	NA			ort009669	1125.34	3.82247	1.63034	2.34459	0.0190482	0.653388			ort001269	418.729	-4.12582	1.76101	-2.34288
ort008961	459.242	-4.13172	1.74248	-2.37117	0.0177318	0.608265			ort004128	27.2354	-8.04665	3.5892	-2.24191	0.0249672	NA			ort005856	158.226	-3.92371	1.78025	-2.20402	0.0275229	0.999867			ort009102	26.0895	-8.39391	3.65361	-2.29743	0.0215942	NA			ort009082	867.858	-3.85357	1.64699	-2.33977	0.0192956	0.653388			ort009596	122.359	-5.11263	2.18283	-2.34221
ort009791	88.4744	-4.80503	2.03195	-2.36473	0.0180431	NA			ort005948	290.539	3.75067	1.67387	2.24072	0.0250444	NA			ort000638	74.7982	4.45044	2.02443	2.19837	0.0279226	0.999867			ort003408	469.82	-3.9436	1.71971	-2.29318	0.0218379	NA			ort007986	971.335	-3.83073	1.63789	-2.33881	0.019345	0.653388			ort011031	3320.65	-3.72784	1.5954	-2.33662
ort001385	531.005	-4.08554	1.73005	-2.36152	0.0182001	0.612696			ort009898	1035.9	-3.46115	1.54541	-2.23962	0.0251153	0.691768			ort003750	961.748	-3.4132	1.55278	-2.19812	0.0279403	0.999867			ort010401	133.978	-4.43943	1.94764	-2.27938	0.0226443	NA			ort000432	33.7991	8.64618	3.71	2.33051	0.0197793	NA			ort009343	82.9344	5.47923	2.34619	2.33537
ort003314	29.1973	7.75186	3.28559	2.35935	0.0183071	NA			ort003324	473.055	-3.58465	1.60474	-2.23379	0.025497	NA			ort011119	1484.82	-3.37147	1.5354	-2.19583	0.028104	0.999867			ort002326	80.3726	5.03944	2.21159	2.27865	0.0226881	NA			ort001731	33.7991	8.64618	3.71	2.33051	0.0197793	NA			ort003899	6578.43	-3.69485	1.58238	-2.33499
ort007193	54484.7	-3.93349	1.66788	-2.35838	0.0183551	0.612696			ort007183	183.987	-3.94759	1.77159	-2.22827	0.0258622	NA			ort003185	32.1986	6.28048	2.86102	2.19519	0.0281501	0.999867			ort001476	29.5138	8.07993	3.54862	2.27692	0.0227908	NA			ort001100	36.2287	-8.4969	3.65202	-2.32663	0.0199848	NA			ort007485	230.522	4.38248	1.87697	2.33487
ort010797	351064	-3.93072	1.66718	-2.35771	0.0183883	0.612696			ort005779	868.869	-3.45105	1.54951	-2.22718	0.025935	0.707477			ort008312	524.471	3.47239	1.58438	2.19164	0.0284057	0.999867			ort006725	255.663	-4.07332	1.79056	-2.27489	0.0229125	NA			ort000117	440.275	-3.98416	1.71422	-2.32418	0.0201159	NA			ort009669	767.415	3.89393	1.66857	2.33369
ort001120	8443.45	15.927	6.76644	2.35383	0.0185813	0.612696			ort004530	536.723	3.52632	1.58501	2.2248	0.0260947	NA			ort004475	23.3095	-7.69538	3.51804	-2.1874	0.0287131	0.999867			ort008169	1153.51	3.74527	1.64995	2.26993	0.0232116	NA			ort001383	1168.83	3.7529	1.61593	2.32243	0.0202096	0.670242			ort003763	757.427	3.88538	1.66773	2.32974
ort009919	87.0017	-4.77993	2.03259	-2.35164	0.0186908	NA			ort002644	156.298	-4.03965	1.81641	-2.22397	0.0261505	NA			ort011552	62.3648	4.60982	2.11126	2.18344	0.0290031	0.999867			ort008779	1707.12	3.71293	1.63591	2.26965	0.0232291	NA			ort011594	1898.11	-3.69856	1.59304	-2.3217	0.020249	0.670242			ort002099	81.3837	-5.86276	2.51841	-2.32796
ort001383	312.247	4.19174	1.78453	2.34893	0.0188273	0.612696			ort007917	207.658	-3.85323	1.73602	-2.21957	0.0264477	NA			ort008550	531.264	-3.44681	1.58093	-2.18025	0.0292392	0.999867			ort009504	143.973	4.39736	1.93752	2.26958	0.023233	NA			ort011216	66.6689	-5.91038	2.54923	-2.3185	0.0204222	NA			ort002974	81.3837	-5.86276	2.51841	-2.32796
ort009519	832.174	4.01103	1.70888	2.34717	0.0189167	0.612696			ort004248	68.7656	-4.89248	2.20731	-2.21649	0.0266583	NA			ort002772	501.011	-3.44322	1.58319	-2.17487	0.0296399	0.999867			ort002730	24.9036	-8.3268	3.67183	-2.26775	0.0233444	NA			ort003280	133.312	-4.70989	2.03503	-2.31441	0.0206452	NA			ort003760	446.936	-4.05064	1.74073	-2.32698
ort005617	421.065	-4.08527	1.74139	-2.34598	0.0189773	0.612696			ort001484	1548.99	3.3544	1.51484	2.21436	0.0268038	0.715013			ort009231	30287.7	-3.24871	1.49553	-2.17229	0.0298341	0.999867			ort006496	319.594	3.98583	1.75777	2.26754	0.023357	NA			ort008024	1114.83	3.73335	1.61383	2.31334	0.0207039	0.678513			ort007528	887.653	-3.8452	1.65445	-2.32416
ort006059	28.5183	7.71791	3.29364	2.34328	0.0191151	NA			ort009621	3329.42	-14.9795	6.76649	-2.21377	0.0268443	0.715013			ort002953	144.12	-3.87932	1.78675	-2.17116	0.029919	0.999867			ort010846	321.795	-3.96269	1.74934	-2.26525	0.0234975	NA			ort010604	197.749	-4.34607	1.88237	-2.30883	0.0209531	NA			ort007169	65.7089	5.88814	2.53426	2.32342
ort008181	28.5183	7.71791	3.29364	2.34328	0.0191151	NA			ort000984	411.221	3.55974	1.60856	2.213	0.0268976	NA			ort006589	18.9515	7.97685	3.67774	2.16895	0.0300861	0.999867			ort000274	584.889	-3.8154	1.68505	-2.26427	0.0235576	NA			ort000372	94.8814	5.06533	2.19392	2.3088	0.0209546	NA			ort002656	187.419	4.48701	1.93256	2.3218
ort011300	28.5183	7.71791	3.29364	2.34328	0.0191151	NA			ort004454	113.202	-4.26428	1.92698	-2.21294	0.0269019	NA			ort005429	86.8849	-4.27074	1.96962	-2.1683	0.0301355	0.999867			ort008085	142.708	4.38402	1.93659	2.26378	0.0235875	NA			ort007817	6707.59	-3.57748	1.55473	-2.30103	0.0213902	0.694132			ort006711	67.9676	-6.61276	2.85021	-2.32009
ort008287	367.194	4.12669	1.76356	2.33998	0.0192845	0.617426			ort001570	2174.57	-3.32666	1.50392	-2.21199	0.0269674	0.715013			ort007673	96.4057	4.09881	1.89399	2.16411	0.0304558	0.999867			ort000436	1743.95	-3.69227	1.63121	-2.26352	0.0236037	NA			ort001946	293.444	4.06819	1.76958	2.29896	0.0215074	NA			ort000588	271.604	4.22136	1.82316	2.31541
ort008627	1475.02	-3.9328	1.68337	-2.33626	0.0194777	0.618459			ort005919	23.5172	8.16153	3.69351	2.2097	0.0271262	NA			ort006760	133.912	3.86725	1.78738	2.16364	0.0304923	0.999867			ort011032	117.719	-4.47679	1.97989	-2.26113	0.0237515	NA			ort005999	450.922	3.89329	1.69384	2.2985	0.0215335	NA			ort007937	189.845	4.43937	1.92149	2.31038
ort001229	164.655	-4.32812	1.85504	-2.33317	0.019639	NA			ort001464	428.125	3.53815	1.60165	2.20906	0.0271702	NA			ort008627	3873.85	-3.24656	1.50113	-2.16275	0.0305607	0.999867			ort008047	368.282	-3.89542	1.72668	-2.25602	0.0240695	NA			ort000576	2318.07	3.60855	1.57183	2.29576	0.0216894	0.69701			ort001049	31.6215	8.88464	3.85046	2.30742
ort010519	207.872	-4.22887	1.81444	-2.33067	0.0197706	NA			ort006862	781.564	-3.41029	1.54603	-2.20584	0.0273954	0.719636			ort003708	305.141	3.51555	1.62576	2.16241	0.0305868	0.999867			ort003709	289.566	3.98548	1.76662	2.25599	0.0240713	NA			ort005288	154.208	-4.49649	1.95965	-2.29454	0.0217596	NA			ort005956	403.051	-4.02187	1.74573	-2.30383
ort011401	174.796	4.36314	1.87332	2.3291	0.019854	NA			ort011413	37.402	6.37099	2.89003	2.20447	0.0274913	NA			ort005199	49.3202	4.86547	2.25037	2.16208	0.0306122	0.999867			ort006183	497.753	-3.82121	1.69421	-2.25545	0.0241049	NA			ort009479	2397.11	3.58529	1.5668	2.28829	0.0221205	0.704028			ort010549	715.87	-3.81683	1.66109	-2.29779
ort008448	19.1456	-8.26001	3.54895	-2.32745	0.0199411	NA			ort001591	332.377	-3.60774	1.63659	-2.20442	0.0274949	NA			ort004186	3009.63	11.2596	5.21346	2.15971	0.0307949	0.999867			ort007666	849.422	3.73612	1.65715	2.25455	0.0241615	NA			ort004819	1129.63	-3.6286	1.59378	-2.27673	0.0228023	0.718814			ort001731	30.9341	8.85293	3.86111	2.29284
ort005752	879.848	-3.94505	1.69561	-2.32663	0.0199847	0.629355			ort008535	1386.88	3.32409	1.51157	2.19909	0.0278713	0.724071			ort005579	65.2191	4.44515	2.06411	2.15354	0.031276	0.999867			ort006630	131.996	4.41014	1.95652	2.25407	0.0241917	NA			ort005812	33.4772	-8.38294	3.68273	-2.27629	0.0228289	NA			ort000591	726.7	-3.79587	1.65626	-2.29183
ort006365	44863.9	-3.84345	1.6571	-2.31939	0.020374	0.636398			ort003207	250.089	-3.69569	1.68268	-2.19632	0.0280693	NA			ort001550	570.502	-3.3566	1.56079	-2.15058	0.0315094	0.999867			ort009798	520.615	-3.79458	1.68695	-2.24937	0.0244888	NA			ort005870	142.198	-4.50542	1.97958	-2.27595	0.0228489	NA			ort011232	227.386	-4.29817	1.87585	-2.29132
ort004025	59.1343	-5.08044	2.19157	-2.31818	0.0204398	NA			ort003986	28636.4	11.2132	5.11009	2.19432	0.0282125	0.724071			ort002455	587.467	-3.34677	1.55765	-2.14861	0.0316655	0.999867			ort000062	1123.77	-3.67916	1.63759	-2.2467	0.0246593	NA			ort004851	105.066	4.78858	2.107	2.2727	0.0230443	NA			ort000568	217.607	-4.32935	1.8896	-2.29115
ort000860	124.66	4.53506	1.95808	2.31608	0.0205539	NA			ort003906	22.9572	8.12676	3.70501	2.19345	0.028275	NA			ort005687	493.646	-3.37474	1.57118	-2.1479	0.0317215	0.999867			ort011307	503.489	3.79672	1.69115	2.24504	0.0247653	NA			ort005282	23356.9	-12.064	5.31736	-2.2688	0.0232805	0.726967			ort009518	84.673	5.24045	2.29098	2.28743
ort001915	240.325	4.1857	1.80864	2.31427	0.0206527	NA			ort006995	892.496	3.35474	1.52997	2.19269	0.0283299	0.724071			ort009171	18.3402	7.92954	3.69341	2.14694	0.0317978	0.999867			ort006059	46.9718	6.28939	2.8036	2.24333	0.0248758	NA			ort009255	3990.62	3.49265	1.5423	2.26458	0.0235384	0.72815			ort008326	982.985	-3.71784	1.62588	-2.28667
ort004819	442.191	-3.9923	1.72742	-2.31113	0.0208256	0.637695			ort005199	44.0078	5.5934	2.5517	2.19203	0.0283774	NA			ort008287	157.151	3.72606	1.73648	2.14575	0.0318927	0.999867			ort005914	61.5737	-5.15009	2.2965	-2.24258	0.0249238	NA			ort010996	284.09	3.97662	1.75615	2.2644	0.0235497	NA			ort004977	110.188	4.87273	2.13223	2.28528
ort005129	519.812	3.98253	1.72433	2.30961	0.0209096	0.637695			ort001352	182.834	3.82442	1.74578	2.19067	0.0284755	NA			ort006995	1094.44	3.25976	1.52008	2.14446	0.0319957	0.999867			ort006981	270.816	-3.95133	1.76258	-2.24179	0.0249751	NA			ort001853	1462.17	3.54877	1.57017	2.26011	0.0238142	0.72986			ort007165	186.087	-4.43015	1.93938	-2.28431
ort003851	64.6284	-4.94139	2.1401	-2.30896	0.020946	NA			ort003713	51.1735	5.2174	2.38184	2.19049	0.0284885	NA			ort004667	132.058	-3.85094	1.79635	-2.14375	0.0320527	0.999867			ort001744	27.8273	7.99504	3.56868	2.24034	0.0250691	NA			ort004691	98.1994	-4.85905	2.15169	-2.25825	0.0239301	NA			ort011510	813.264	3.72721	1.63471	2.28004
ort009621	3152.4	-15.6225	6.7665	-2.30879	0.0209551	0.637695			ort001685	301.116	-3.59886	1.64439	-2.18857	0.0286284	NA			ort004376	656.781	3.31115	1.54496	2.1432	0.0320973	0.999867			ort000872	613.152	3.74009	1.67072	2.23861	0.025181	NA			ort008615	154.527	4.32624	1.92154	2.25144	0.0243576	NA			ort001476	30.2467	8.82051	3.87245	2.27776
ort003404	371.383	4.03484	1.751	2.30431	0.0212051	0.637695			ort003708	191.567	3.78608	1.73169	2.18635	0.02879	NA			ort001591	190.313	-3.64787	1.7026	-2.14252	0.0321513	0.999867			ort003581	1783.89	-3.61136	1.61593	-2.23485	0.0254271	NA			ort003150	32.1014	-8.3224	3.69974	-2.24945	0.0244837	NA			ort004939	45.0462	6.94085	3.05279	2.27361
ort006428	134.223	4.44523	1.92988	2.30337	0.0212583	NA			ort006571	1088.18	-3.31004	1.51569	-2.18385	0.0289733	0.733903			ort003321	61.3325	-4.5898	2.14499	-2.13978	0.0323729	0.999867			ort002643	94.5148	-4.57935	2.04924	-2.23466	0.0254397	NA			ort002303	60.2486	-5.76174	2.56182	-2.24908	0.0245074	NA			ort003910	173.034	-4.45171	1.95924	-2.27217
ort009202	145.484	4.38902	1.90684	2.30173	0.0213505	NA			ort009010	244.731	-3.66201	1.67899	-2.18108	0.0291777	NA			ort007105	193.844	3.60492	1.68655	2.13746	0.032561	0.999867			ort008860	56459.7	-3.54945	1.58923	-2.23344	0.0255197	0.482231			ort010924	50.5316	-6.51867	2.90069	-2.24728	0.0246219	NA			ort009255	3116.16	3.54771	1.562	2.27126
ort000372	26.8208	7.62937	3.31481	2.3016	0.0213576	NA			ort009167	220.167	-3.70518	1.70045	-2.17894	0.0293365	NA			ort000607	3432.3	-3.1855	1.49055	-2.13714	0.0325869	0.999867			ort009446	148.709	-4.21679	1.88814	-2.23331	0.0255287	NA			ort006186	100.705	4.72515	2.10703	2.24256	0.0249251	NA			ort001659	1458.82	-3.60655	1.59015	-2.26806
ort009479	689.124	3.91983	1.70413	2.3002	0.0214369	0.637695			ort008643	222.689	3.6842	1.69214	2.17725	0.0294622	NA			ort007474	362.223	3.39279	1.59056	2.13308	0.0329181	0.999867			ort008915	118.733	-4.36888	1.95789	-2.23142	0.0256532	NA			ort010615	100.705	4.72515	2.10703	2.24256	0.0249251	NA			ort009102	38.9134	-8.26548	3.64728	-2.2662
ort005856	245.537	-4.09426	1.78114	-2.29867	0.0215237	0.637695			ort007132	1334.36	3.26837	1.50199	2.17602	0.0295535	0.741976			ort003309	143.095	-3.76862	1.76689	-2.13291	0.0329325	0.999867			ort011031	2758.25	-3.57634	1.60391	-2.22976	0.025763	0.482231			ort001596	29.4379	8.44687	3.76894	2.24118	0.0250143	NA			ort000281	4880.21	-3.50963	1.55	-2.26427
ort001078	3316.04	-3.81245	1.65991	-2.29678	0.0216313	0.637695			ort004275	24.5565	-7.89727	3.63384	-2.17326	0.0297608	NA			ort008779	1792.43	3.19316	1.49855	2.13083	0.0331031	0.999867			ort002916	437.36	3.78159	1.69671	2.22877	0.025829	NA			ort001744	29.4379	8.44687	3.76894	2.24118	0.0250143	NA			ort008384	29.5592	8.78734	3.88426	2.2623
ort000562	508.948	3.95011	1.72131	2.29482	0.0217434	0.637695			ort005761	217.042	-3.68296	1.6982	-2.16874	0.0301028	NA			ort001476	17.7288	7.88063	3.7101	2.1241	0.0336615	0.999867			ort007066	45.707	6.24949	2.80726	2.22619	0.0260016	NA			ort008187	599.988	3.64246	1.62561	2.24068	0.0250469	NA			ort011439	61.7851	-6.4737	2.86597	-2.25881
ort005780	26.4813	7.611	3.31938	2.2929	0.021854	NA			ort004057	387.429	-3.45016	1.59412	-2.1643	0.0304415	NA			ort007937	20.8559	-7.53491	3.56285	-2.11485	0.0344425	0.999867			ort011123	140.58	-4.21822	1.89795	-2.22251	0.026249	NA			ort004057	735.325	-3.5964	1.60584	-2.23957	0.0251188	0.753176			ort009177	67.4474	5.50348	2.43853	2.25689
ort006080	26.4813	7.611	3.31938	2.2929	0.021854	NA			ort009544	42.328	5.53607	2.55886	2.16349	0.0305032	NA			ort001120	1274.44	11.6049	5.49166	2.11318	0.0345851	0.999867			ort002526	196.382	-4.02241	1.81148	-2.22051	0.0263843	NA			ort003708	371.936	3.78096	1.68944	2.23799	0.0252215	NA			ort007455	495.407	3.7873	1.67841	2.25648
ort007295	248.085	-4.07231	1.77736	-2.29122	0.0219509	0.638904			ort008991	21.8374	8.05461	3.72968	2.1596	0.0308037	NA			ort003408	313.358	-3.37719	1.60103	-2.10938	0.0349118	0.999867			ort003623	45.2853	6.23595	2.80854	2.22035	0.0263949	NA			ort004455	913.161	3.54634	1.58549	2.23674	0.0253034	0.753176			ort009931	108.176	-4.92941	2.18499	-2.25603
ort008428	131.507	4.41437	1.92914	2.28826	0.0221222	NA			ort007455	210.483	3.64031	1.6914	2.15225	0.0313778	NA			ort010195	56.2515	4.45454	2.1152	2.10596	0.0352075	0.999867			ort001098	23.1247	-8.21988	3.70237	-2.22017	0.0264073	NA			ort000872	845.511	3.55032	1.58959	2.23347	0.0255177	0.753176			ort009463	507.514	-3.78298	1.67945	-2.25251
ort009446	107.108	-4.42856	1.93893	-2.28402	0.0223704	NA			ort006915	606.111	3.28895	1.53407	2.14394	0.0320376	0.79722			ort006547	84.3813	4.01749	1.90986	2.10355	0.0354176	0.999867			ort000922	2343.57	-3.54723	1.60028	-2.21663	0.0266483	NA			ort003815	1057.72	-3.51567	1.57422	-2.23327	0.0255309	0.753176			ort010000	73.9979	5.31084	2.35841	2.25187
ort011463	4727.64	3.76815	1.65296	2.27964	0.0226291	0.651617			ort002717	249.09	-3.54967	1.65582	-2.14375	0.0320529	NA			ort000608	17.1175	7.83001	3.72771	2.10048	0.0356863	0.999867			ort009082	690.208	-3.64718	1.64698	-2.21447	0.0267968	NA			ort005402	3876.97	-3.40105	1.52477	-2.23052	0.0257126	0.753176			ort004691	96.2146	-5.08704	2.26098	-2.24992
ort006945	30.5307	-6.47449	2.84412	-2.27645	0.0228192	NA			ort003707	21.2774	8.01714	3.74291	2.14195	0.0321974	NA			ort001439	17.1175	7.83001	3.72771	2.10048	0.0356863	0.999867			ort011225	44.128	-5.6817	2.57063	-2.21023	0.0270891	NA			ort000437	6302.23	-11.9111	5.35586	-2.22393	0.026153	0.759356			ort010148	678.777	3.68093	1.63623	2.24965
ort010183	51694.9	-3.73172	1.64343	-2.27069	0.0231656	0.651617			ort003024	38.5109	-6.08267	2.8413	-2.1408	0.0322899	NA			ort007873	3728.81	-3.09006	1.47186	-2.09943	0.0357792	0.999867			ort006796	65.5529	-4.91142	2.22349	-2.20888	0.0271831	NA			ort005224	547.17	3.61556	1.62628	2.2232	0.026202	NA			ort004362	437.644	-3.82354	1.70037	-2.24865
ort001874	35949.2	-3.7272	1.64296	-2.26859	0.0232932	0.651617			ort003909	12933.4	3.1003	1.44841	2.14048	0.0323159	0.79722			ort006463	159.601	3.58608	1.70828	2.09923	0.0357965	0.999867			ort007118	3149.51	3.51228	1.59098	2.20763	0.0272702	0.497681			ort002974	76.4725	-5.09037	2.2905	-2.22238	0.0262573	NA			ort004819	1255.56	-3.56831	1.58785	-2.24726
ort002100	17.6729	-8.14453	3.59073	-2.26821	0.0233164	NA			ort004872	1612.52	3.14857	1.47512	2.13445	0.0328061	0.798879			ort007066	33.8302	5.33494	2.54435	2.09678	0.0360131	0.999867			ort001501	319.753	-3.79389	1.71885	-2.20723	0.0272982	NA			ort003107	52.7062	5.81925	2.619	2.22194	0.0262876	NA			ort003247	28.8718	8.7534	3.89657	2.24643
ort003421	54379.6	-3.72255	1.64217	-2.26685	0.0233994	0.651617			ort010460	483.127	-3.3106	1.55207	-2.13302	0.0329227	NA			ort008694	386.081	3.26423	1.56235	2.0893	0.0366808	0.999867			ort000228	119.748	-4.2695	1.93742	-2.2037	0.0275453	NA			ort000760	28.3477	8.39243	3.78642	2.21645	0.0266604	NA			ort000847	2796.12	12.9079	5.75968	2.24107
ort003451	105.251	4.51234	1.99243	2.26474	0.0235286	NA			ort003599	714.921	3.23229	1.51556	2.13274	0.0329464	0.798879			ort002473	20.038	-7.4772	3.58025	-2.08846	0.0367565	0.999867			ort004529	51.072	-5.29923	2.40609	-2.20243	0.0276353	NA			ort011202	667.664	3.5435	1.60004	2.21463	0.0267853	NA			ort002772	407.215	-3.8267	1.70811	-2.24031
ort007183	145.17	-4.20444	1.85714	-2.26393	0.0235785	NA			ort007587	22.7706	-7.78834	3.66895	-2.12277	0.0337733	NA			ort007041	42.1165	-5.06372	2.42466	-2.08843	0.0367593	0.999867			ort004809	569.288	-3.64409	1.65472	-2.20224	0.0276486	NA			ort006385	218.82	3.94987	1.78701	2.21032	0.027083	NA			ort003730	6527.35	3.42576	1.53137	2.23705
ort003708	93.6503	4.6109	2.03816	2.26228	0.0236799	NA			ort008779	1662.1	3.10341	1.46588	2.11709	0.0342518	0.823495			ort010591	42.1165	-5.06372	2.42466	-2.08843	0.0367593	0.999867			ort009260	160.68	4.09303	1.86048	2.19998	0.0278081	NA			ort006322	91.7791	-4.75802	2.1527	-2.21025	0.0270876	NA			ort010098	2693.01	3.44946	1.54551	2.23193
ort010288	35749.7	-3.70857	1.64069	-2.26037	0.0237981	0.651617			ort004528	59.8359	-4.68454	2.21766	-2.11238	0.0346537	NA			ort005288	63.9885	-4.31712	2.07107	-2.08449	0.0371158	0.999867			ort002772	724.665	-3.59931	1.6362	-2.1998	0.0278214	NA			ort009231	19797.9	-3.30445	1.49737	-2.20683	0.0273259	0.786509			ort003107	50.2219	6.08843	2.72793	2.23188
ort011392	58.5093	5.27529	2.33424	2.25996	0.0238237	NA			ort008812	59.8359	-4.68454	2.21766	-2.11238	0.0346537	NA			ort005255	398.996	-3.25197	1.56022	-2.0843	0.0371327	0.999867			ort009898	860.566	-3.57506	1.62575	-2.19903	0.0278759	NA			ort008675	265.468	3.83123	1.73692	2.20576	0.0274006	NA			ort003647	198.213	4.15331	1.86126	2.23145
ort006949	51301.2	-3.70276	1.63978	-2.25808	0.0239405	0.651617			ort011248	172.719	-3.63358	1.72277	-2.10915	0.0349314	NA			ort004489	90.7013	3.89167	1.86877	2.08248	0.0372988	0.999867			ort003280	89.7712	-4.50188	2.0474	-2.19883	0.0278901	NA			ort010724	5124.5	3.31703	1.50558	2.20316	0.0275836	0.787084			ort004580	401.396	-3.80446	1.70538	-2.23085
ort009978	810.912	-3.79028	1.67883	-2.25769	0.0239648	0.651617			ort004691	36.725	-6.01313	2.8517	-2.10861	0.0349781	NA			ort001307	232.822	-3.39786	1.63209	-2.08191	0.0373503	0.999867			ort010305	400.445	-3.69676	1.68427	-2.19488	0.0281724	NA			ort007226	161.354	4.13078	1.87523	2.20281	0.0276079	NA			ort000700	28.1844	8.71863	3.90944	2.23015
ort005402	2466.84	-15.2687	6.76651	-2.25651	0.0240388	0.651617			ort001269	183.215	-3.59552	1.70617	-2.10736	0.0350862	NA			ort006914	49.2709	-4.69289	2.25615	-2.08005	0.0375211	0.999867			ort004544	3109.59	-3.4764	1.58409	-2.19457	0.0281948	0.499448			ort006964	46.8629	-6.4087	2.91528	-2.19832	0.0279265	NA			ort002584	514.304	-3.71326	1.66516	-2.22997
ort003581	1080.63	-3.76559	1.66878	-2.2565	0.0240395	0.651617			ort002326	94.3871	4.05456	1.92471	2.10658	0.035154	NA			ort000847	1329.26	10.6653	5.13174	2.0783	0.0376817	0.999867			ort003914	25.7192	7.88139	3.59773	2.19065	0.0284768	NA			ort003770	27.2574	8.33584	3.80492	2.19081	0.0284659	NA			ort009504	234.807	4.04	1.81174	2.2299
ort009400	39308.8	-3.69801	1.63934	-2.25579	0.0240837	0.651617			ort001307	406.87	-3.27587	1.55737	-2.10346	0.0354256	NA			ort001743	523.879	-3.18293	1.53201	-2.07762	0.0377443	0.999867			ort004604	150.146	-4.07084	1.85932	-2.18942	0.0285663	NA			ort003158	2177.63	-3.32253	1.51714	-2.19	0.0285244	0.796949			ort001721	338.396	-3.8463	1.73242	-2.22019
ort008953	221.313	4.05997	1.8011	2.25417	0.0241857	NA			ort011099	162.117	3.63785	1.73027	2.10248	0.0355116	NA			ort002967	43.8181	4.68859	2.26203	2.07274	0.0381965	0.999867			ort005908	299.764	-3.72456	1.71138	-2.17635	0.0295292	NA			ort001818	907.675	3.4118	1.55932	2.18801	0.028669	0.796949			ort005288	141.838	-4.45453	2.00777	-2.21865
ort010788	32463.6	-3.68909	1.63838	-2.25167	0.0243431	0.653108			ort008531	1610.36	3.06493	1.45909	2.10058	0.0356783	0.8477			ort007140	32.6075	5.2805	2.55129	2.06973	0.0384774	0.999867			ort007732	41.9123	6.12274	2.81981	2.17133	0.029906	NA			ort007937	620.582	3.48431	1.59268	2.1877	0.0286917	NA			ort001307	503.758	-3.68106	1.66076	-2.21649
ort004435	1012.49	-3.75241	1.66849	-2.24898	0.0245138	0.653108			ort005328	73.5634	4.29242	2.04464	2.09935	0.035786	NA			ort000372	26.6965	6.0063	2.9046	2.06786	0.0386536	0.999867			ort008384	24.876	7.83329	3.61071	2.16946	0.0300476	NA			ort000645	9962.61	3.25565	1.48953	2.18568	0.028839	0.796949			ort004355	27.497	8.68301	3.92288	2.21343
ort009997	124.717	4.3342	1.92785	2.2482	0.0245634	NA			ort011363	1857.24	-3.05153	1.45411	-2.09855	0.0358562	0.8477			ort006279	26.6965	6.0063	2.9046	2.06786	0.0386536	0.999867			ort000419	8663.43	3.38799	1.56174	2.16937	0.0300543	0.499448			ort000607	7458.42	-3.24913	1.48962	-2.18118	0.0291699	0.796949			ort006596	57.421	-6.36678	2.87929	-2.21123
ort004977	167.045	4.16221	1.85205	2.24736	0.024617	NA			ort006466	21.8776	-7.73062	3.68865	-2.09579	0.0361009	NA			ort001449	48.453	-4.6678	2.25755	-2.06764	0.038674	0.999867			ort011035	389.545	3.63314	1.67662	2.16694	0.0302391	NA			ort002493	978.708	3.38026	1.55005	2.18074	0.0292024	0.796949			ort007856	175.5	-4.22019	1.91142	-2.20789
ort009891	24673	-3.67722	1.63716	-2.2461	0.0246974	0.653108			ort011156	125.377	-3.79986	1.81464	-2.094	0.0362602	NA			ort007948	311.512	-3.26538	1.58031	-2.0663	0.0388006	0.999867			ort008293	1363.84	-3.43944	1.58852	-2.16519	0.0303733	NA			ort003245	80.2277	-4.82948	2.21523	-2.18012	0.0292484	NA			ort004195	822.804	-3.51953	1.59694	-2.20392
ort003352	534.755	3.82061	1.70243	2.24421	0.0248188	0.653108			ort003286	73.0035	4.28084	2.04489	2.09343	0.036311	NA			ort003709	163.884	3.47821	1.68434	2.06503	0.0389205	0.999867			ort002652	9022.66	3.37473	1.55909	2.16456	0.0304218	0.499448			ort009355	345.719	-3.64304	1.67138	-2.17966	0.0292827	NA			ort001220	67.9276	-5.5971	2.54062	-2.20305
ort000645	70.462	-4.64053	2.06961	-2.24222	0.024947	NA			ort003185	31.8027	6.13395	2.9303	2.09328	0.0363238	NA			ort000576	112.227	-3.7138	1.80076	-2.06236	0.0391738	0.999867			ort006653	34.2193	-6.32474	2.9221	-2.16445	0.0304298	NA			ort007908	209.007	3.87929	1.78057	2.17867	0.0293559	NA			ort002315	79.1617	-5.22437	2.37279	-2.20178
ort005277	31447	-3.65116	1.63376	-2.23482	0.0254291	0.662331			ort005420	1395.19	-3.05868	1.46124	-2.09321	0.0363303	0.8483			ort004293	19.2201	-7.41708	3.59906	-2.06084	0.0393187	0.999867			ort006381	2851.27	-3.39781	1.57007	-2.16412	0.0304554	0.499448			ort005948	898.866	3.38713	1.55485	2.17843	0.029374	0.796949			ort007217	78.4343	-5.21069	2.37356	-2.1953
ort002916	796.364	3.74627	1.67729	2.23353	0.0255141	0.662331			ort010055	394.182	3.24948	1.5535	2.09172	0.0364632	NA			ort005696	105.481	-3.74181	1.81909	-2.05697	0.0396893	0.999867			ort008088	130.23	4.11293	1.90154	2.16294	0.0305454	NA			ort011671	26.7122	8.3067	3.81489	2.17744	0.0294475	NA			ort003024	286.226	-3.8501	1.75482	-2.19401
ort008384	24.1047	7.47534	3.35504	2.22809	0.0258744	NA			ort002193	803.006	3.10731	1.4869	2.08979	0.0366364	0.8483			ort008915	87.2897	-3.89382	1.89307	-2.05688	0.0396979	0.999867			ort011435	1251.64	-3.42404	1.58741	-2.15701	0.0310052	NA			ort004428	121.533	4.27691	1.96717	2.17414	0.0296947	NA			ort007662	325.304	-3.78533	1.72557	-2.19367
ort008025	4633.88	15.0615	6.76645	2.2259	0.0260206	0.666336			ort002577	201.298	3.48352	1.66811	2.0883	0.0367706	NA			ort008236	26467.7	2.96589	1.44196	2.05684	0.0397017	0.999867			ort002675	1281.87	-3.41863	1.58586	-2.15569	0.0311077	NA			ort010000	84.9822	4.67088	2.15038	2.17212	0.0298467	NA			ort000438	154.123	-4.27663	1.95202	-2.19088
ort001220	68.9893	-4.60882	2.07127	-2.22512	0.0260729	NA			ort007739	785.988	3.09886	1.48611	2.08521	0.0370499	0.8483			ort010007	12118.9	-2.96467	1.44295	-2.0546	0.0399181	0.999867			ort010792	357.253	-3.61344	1.67661	-2.1552	0.0311463	NA			ort003468	48.8901	5.70883	2.63222	2.16883	0.0300959	NA			ort006664	495.647	3.59748	1.6427	2.18998
ort010146	78.3152	4.6774	2.10215	2.22505	0.0260776	NA			ort000855	44.4543	5.00845	2.403	2.08425	0.0371372	NA			ort001335	40.0718	-4.98972	2.43109	-2.05246	0.0401248	0.999867			ort006734	78.6767	-4.48058	2.07917	-2.15498	0.0311635	NA			ort011248	441.747	-3.51934	1.62438	-2.16657	0.0302677	NA			ort003083	2786.46	-3.33704	1.52381	-2.18994
ort011552	55.7933	5.2049	2.34007	2.22425	0.0261319	NA			ort006053	249.21	3.37727	1.62096	2.0835	0.0372056	NA			ort002208	1404.79	-3.0148	1.46909	-2.05215	0.0401549	0.999867			ort000267	51838.1	-3.33846	1.54955	-2.15448	0.0312028	0.499448			ort010568	48.345	5.69234	2.63433	2.16083	0.0307085	NA			ort009701	358.858	3.7111	1.69462	2.18992
ort004128	58.0011	-4.77993	2.152	-2.22116	0.02634	NA			ort005248	1826.21	-3.01521	1.44738	-2.08323	0.0372305	0.8483			ort008743	26.0852	5.97235	2.91067	2.05188	0.0401811	0.999867			ort003841	20.753	-8.06376	3.75117	-2.14967	0.0315816	NA			ort008515	1672.17	3.263	1.51047	2.16026	0.0307528	0.824566			ort011527	2632.01	-3.34057	1.52544	-2.1899
ort005983	130.546	4.22482	1.9029	2.2202	0.0264052	NA			ort002974	35.3855	-5.95868	2.86036	-2.08319	0.0372338	NA			ort006085	574.356	-3.1021	1.51231	-2.05123	0.0402444	0.999867			ort005796	20.753	-8.06376	3.75117	-2.14967	0.0315816	NA			ort002675	2157.46	-3.23909	1.50063	-2.15849	0.0308901	0.824566			ort008124	145.071	-4.32935	1.97732	-2.18951
ort003599	546.131	3.75939	1.69371	2.21962	0.0264447	0.666336			ort005164	140.733	3.66727	1.7611	2.08237	0.0373087	NA			ort002974	18.8112	-7.38605	3.60906	-2.04653	0.0407041	0.999867			ort003191	60.2165	-4.78467	2.22726	-2.14823	0.0316953	NA			ort010081	164.817	-3.98149	1.84571	-2.15716	0.0309932	NA			ort004293	34.5493	-8.09387	3.6975	-2.18901
ort003915	119.964	4.2753	1.9271	2.21852	0.0265194	NA			ort005540	21.4311	-7.70088	3.69906	-2.08184	0.0373567	NA			ort010076	18.8112	-7.38605	3.60906	-2.04653	0.0407041	0.999867			ort006413	155.37	3.9427	1.83716	2.14608	0.0318665	NA			ort008085	182.096	3.89559	1.80695	2.1559	0.0310918	NA			ort009898	1224.21	-3.41135	1.55864	-2.18867
ort005861	1237.36	3.67507	1.65688	2.21806	0.0265509	0.666336			ort007365	2276.55	-2.99908	1.44074	-2.08163	0.0373766	0.8483			ort005474	236.292	-3.28339	1.60867	-2.04106	0.0412449	0.999867			ort006374	5891.08	3.32935	1.55213	2.14502	0.0319515	0.499448			ort003501	264.885	-3.68735	1.71112	-2.15493	0.0311672	NA			ort001456	381.663	3.67904	1.68207	2.18721
ort002642	23174.2	-3.61094	1.62909	-2.21654	0.0266547	0.666336			ort008562	299.249	3.29429	1.5858	2.07738	0.037767	NA			ort004559	289.024	-3.21374	1.57653	-2.03849	0.0415008	0.999867			ort001075	1906.99	-3.36162	1.56799	-2.1439	0.0320408	NA			ort002645	27.5155	-8.10001	3.76888	-2.14918	0.0316199	NA			ort002100	236.261	3.89191	1.78323	2.1825
ort009882	3028.33	3.63178	1.63918	2.21561	0.0267179	0.666336			ort009622	12247.8	10.0416	4.83547	2.07665	0.037834	0.85131			ort009798	289.024	-3.21374	1.57653	-2.03849	0.0415008	0.999867			ort004884	3033.14	3.3392	1.55858	2.14246	0.0321563	0.499448			ort002254	2352.96	-3.2022	1.4917	-2.14669	0.0318183	0.834128			ort000667	193.564	-4.05297	1.85894	-2.18026
ort003088	897.679	-3.68293	1.6629	-2.21477	0.026776	0.666336			ort008406	43.8943	4.98959	2.40515	2.07454	0.038029	NA			ort007931	366.114	3.14376	1.54294	2.03751	0.041599	0.999867			ort001608	1062.98	-3.39396	1.58557	-2.14053	0.032312	NA			ort004128	51.994	-5.54492	2.58399	-2.14588	0.0318828	NA			ort001357	907.265	-3.43079	1.57491	-2.17841
ort009679	108.703	4.3283	1.95641	2.21237	0.026941	NA			ort008605	464.382	-3.16866	1.52753	-2.07437	0.0380451	NA			ort001853	277.028	3.21165	1.57669	2.03696	0.0416545	0.999867			ort008362	39.8042	6.04719	2.82814	2.13822	0.032499	NA			ort009496	130.907	-4.12691	1.92454	-2.14437	0.0320036	NA			ort005773	120.255	4.39535	2.01842	2.17761
ort001252	48167.7	-3.5994	1.62714	-2.2121	0.02696	0.666336			ort005376	465.71	3.1593	1.52454	2.07229	0.0382381	NA			ort005220	25.4738	5.93759	2.91703	2.03549	0.0418018	0.999867			ort002016	48.408	5.3154	2.48646	2.13774	0.0325377	NA			ort003534	3617.35	-3.17366	1.48008	-2.14425	0.0320129	0.834128			ort002643	106.318	-4.63088	2.12859	-2.17556
ort002671	277.053	3.87546	1.75363	2.20996	0.027108	0.666336			ort001946	112.858	3.79377	1.83103	2.07193	0.038272	NA			ort010305	541.442	-3.05705	1.50635	-2.02945	0.0424128	0.999867			ort006350	227.666	3.72473	1.74267	2.13737	0.0325678	NA			ort007387	9174.74	3.14734	1.46807	2.14386	0.032044	0.834128			ort005696	247.109	-3.87075	1.78066	-2.17377
ort001301	7312.18	-3.59892	1.62978	-2.20822	0.0272292	0.666336			ort002168	950.897	-3.04079	1.46847	-2.07072	0.038385	0.85131			ort009850	55.4377	4.19899	2.06905	2.02943	0.0424145	0.999867			ort010525	139.427	3.98148	1.86329	2.1368	0.0326139	NA			ort000281	6144	-3.14874	1.47054	-2.14122	0.0322563	0.834128			ort000437	3291.27	-14.6669	6.76648	-2.16758
ort004584	16.2001	-8.019	3.6393	-2.20345	0.0275634	NA			ort003651	1301.61	-11.1817	5.40057	-2.07046	0.0384095	0.85131			ort008177	1892.85	-2.93976	1.44984	-2.02765	0.0425964	0.999867			ort004428	57.0119	4.95651	2.32034	2.13612	0.0326699	NA			ort005709	309.689	-3.5742	1.66978	-2.14052	0.0323126	NA			ort005883	312.211	-3.72168	1.71857	-2.16557
ort007383	16.2001	-8.019	3.6393	-2.20345	0.0275634	NA			ort003770	19.0377	7.85667	3.80288	2.06598	0.0388304	NA			ort007740	30.7735	5.19477	2.56318	2.02669	0.0426942	0.999867			ort003085	420.328	-3.5187	1.64767	-2.13556	0.0327151	NA			ort002656	344.246	3.52494	1.64732	2.13981	0.0323705	NA			ort008603	180.34	4.00892	1.85239	2.1642
ort004987	1151.46	3.64156	1.65427	2.20131	0.027714	0.673776			ort002315	56.2641	-4.59217	2.22341	-2.06538	0.0388874	NA			ort008654	851.905	-2.9878	1.47584	-2.02448	0.0429206	0.999867			ort008819	1234.01	-3.3646	1.57641	-2.13434	0.0328152	NA			ort005257	27.0569	-8.07576	3.77691	-2.13819	0.0325013	NA			ort010715	281.095	-3.76593	1.74123	-2.1628
ort003358	27.5852	-6.32639	2.87518	-2.20034	0.0277825	NA			ort000768	949.338	-3.02063	1.46462	-2.06241	0.0391691	0.854891			ort009225	36.0731	4.82799	2.38489	2.02441	0.0429281	0.999867			ort001320	550.343	3.46649	1.62449	2.1339	0.0328511	NA			ort011379	42.7356	-6.27405	2.9351	-2.13759	0.0325497	NA			ort011581	25.4347	8.57053	3.96685	2.16054
ort001121	806.157	3.66501	1.66674	2.19891	0.027884	0.673776			ort009585	93.7137	3.92082	1.90111	2.06239	0.0391711	NA			ort000215	117.948	-3.56828	1.7627	-2.02433	0.0429367	0.999867			ort003463	2420.56	14.4371	6.76646	2.13363	0.032873	NA			ort009014	276.769	3.59932	1.68651	2.13418	0.0328284	NA			ort010349	2096.43	3.27427	1.51619	2.15954
ort000125	43.1743	5.84874	2.66275	2.1965	0.0280562	NA			ort008236	28148.6	2.90714	1.40962	2.06236	0.0391737	0.854891			ort009232	65.4177	-4.07332	2.01244	-2.02408	0.0429624	0.999867			ort006711	52.6795	-4.91815	2.30725	-2.13161	0.0330389	NA			ort003814	239.862	-3.67238	1.72171	-2.13298	0.0329261	NA			ort001133	495.194	-3.51347	1.62996	-2.15556
ort008535	921.994	3.63961	1.65957	2.1931	0.0282998	0.677813			ort002575	509.385	-3.11733	1.51179	-2.06202	0.0392059	NA			ort005779	324.994	-3.14479	1.55389	-2.02382	0.0429889	0.999867			ort001065	1015.56	-3.37316	1.5828	-2.13113	0.0330782	NA			ort010525	241.941	3.64702	1.71354	2.12835	0.0333077	NA			ort001946	190.368	3.94091	1.82934	2.15428
ort000635	53.4168	5.14036	2.34585	2.19126	0.0284333	NA			ort004588	102.446	3.83761	1.86237	2.0606	0.0393408	NA			ort006961	201.602	3.28053	1.62115	2.02358	0.043013	0.999867			ort011434	399.075	-3.51777	1.65082	-2.13092	0.0330957	NA			ort007948	402.593	-3.42252	1.61317	-2.12161	0.0338702	NA			ort004169	2852.83	-3.24082	1.50462	-2.15392
ort004833	269.924	3.83525	1.7508	2.19056	0.0284833	0.677813			ort001212	275.34	-3.27647	1.59258	-2.05733	0.039654	NA			ort010527	15.2835	7.6665	3.78911	2.0233	0.043042	0.999867			ort005414	39.3845	-5.51424	2.58792	-2.13076	0.0331091	NA			ort011232	380.235	-3.43586	1.62107	-2.1195	0.0340486	NA			ort000026	137.798	-4.25135	1.97521	-2.15235
ort008896	325.268	3.77862	1.72761	2.1872	0.0287281	0.677813			ort003352	656.234	3.05354	1.48515	2.05605	0.0397775	0.85498			ort011634	45.5904	-4.57638	2.26304	-2.02223	0.0431528	0.999867			ort000844	109.649	4.12865	1.94051	2.12761	0.0333694	NA			ort002460	1626.81	3.15525	1.48939	2.11849	0.0341339	0.875839			ort007679	524.474	3.47494	1.61475	2.152
ort006327	70.8015	-4.47061	2.04419	-2.18698	0.0287439	NA			ort011394	9363.57	-2.89393	1.40939	-2.05332	0.0400411	0.85498			ort007917	83.2004	-3.81982	1.89065	-2.02037	0.0433451	0.999867			ort005288	102.131	-4.14019	1.94674	-2.12673	0.0334426	NA			ort004357	26.1397	-8.026	3.79389	-2.11551	0.0343867	NA			ort003866	3012.21	-3.23012	1.50168	-2.15101
ort009992	17535.5	3.546	1.62154	2.1868	0.0287568	0.677813			ort003704	3156.81	2.91046	1.41935	2.05056	0.0403099	0.85498			ort005896	654.26	-2.99878	1.48696	-2.01672	0.043725	0.999867			ort004082	8414.32	3.27229	1.53974	2.12522	0.0335682	0.499822			ort006566	2112.85	3.12432	1.47764	2.11439	0.0344816	0.877413			ort002506	37.4846	6.67337	3.10584	2.14865
ort010736	202.148	-3.87468	1.773	-2.18537	0.0288615	NA			ort009446	101.82	-3.82307	1.86797	-2.04664	0.0406933	NA			ort001383	605.044	3.0039	1.48986	2.01623	0.0437759	0.999867			ort006534	301179	-3.24577	1.53133	-2.11957	0.0340425	0.499822			ort009898	2014.55	-3.12088	1.47801	-2.11155	0.0347254	0.877413			ort004932	37.4846	6.67337	3.10584	2.14865
ort008812	33.0793	-5.57638	2.5535	-2.18382	0.0289755	NA			ort009798	366.459	-3.15641	1.5426	-2.04617	0.0407399	NA			ort008187	453.779	3.04389	1.51103	2.01445	0.0439624	0.999867			ort006776	1239.76	-3.32375	1.5685	-2.11906	0.0340851	NA			ort004044	427.877	-3.37503	1.59838	-2.11153	0.0347269	NA			ort006964	32.3672	-7.99974	3.72722	-2.1463
ort011413	52.7378	5.12138	2.34763	2.18151	0.0291458	NA			ort000202	817.875	2.9963	1.46472	2.04565	0.0407913	0.85498			ort010881	180.49	-3.31246	1.6455	-2.01305	0.0441096	0.999867			ort006322	63.6028	-4.59343	2.16846	-2.11829	0.0341505	NA			ort006375	280.997	-3.53254	1.67304	-2.11145	0.0347334	NA			ort007754	273.094	-3.72116	1.73672	-2.14264
ort006516	26.8488	-6.28686	2.88404	-2.17988	0.0292663	NA			ort007486	18.4778	7.8136	3.82	2.04545	0.0408109	NA			ort003451	58.292	4.07193	2.02678	2.00907	0.04453	0.999867			ort000980	785.842	-3.36399	1.58878	-2.11734	0.034231	NA			ort003908	72.8903	-4.68599	2.22085	-2.10999	0.0348591	NA			ort006160	24.7473	8.531	3.98311	2.14179
ort003772	2454.23	-3.55172	1.6303	-2.17857	0.0293635	0.681382			ort009022	18.4778	7.8136	3.82	2.04545	0.0408109	NA			ort009621	936.263	-10.5793	5.26636	-2.00886	0.0445525	0.999867			ort006804	2761.27	-3.27553	1.54703	-2.1173	0.0342344	0.499822			ort007621	397.177	-3.37625	1.60514	-2.1034	0.0354306	NA			ort007105	404.264	3.52229	1.64644	2.13935
ort002364	22.4072	7.36999	3.38517	2.17714	0.0294702	NA			ort006089	42.2145	4.93149	2.41203	2.04454	0.0409002	NA			ort009730	936.263	-10.5793	5.26636	-2.00886	0.0445525	0.999867			ort007995	155.119	3.84687	1.81895	2.11489	0.0344397	NA			ort007320	439.032	3.34084	1.5885	2.10314	0.0354534	NA			ort006744	377.598	-3.55754	1.66446	-2.13736
ort001212	243.098	-3.7988	1.74511	-2.17683	0.0294936	NA			ort003558	168.481	-3.4641	1.69445	-2.04438	0.0409162	NA			ort010081	44.7726	-4.54916	2.26486	-2.00858	0.0445816	0.999867			ort006463	302.834	3.55683	1.68183	2.11486	0.0344422	NA			ort008312	1953.45	3.09968	1.47412	2.10274	0.0354885	0.889901			ort007684	74.7253	4.82542	2.25784	2.13718
ort006966	7427.42	-3.52819	1.62101	-2.17653	0.0295155	0.681382			ort007730	528.931	-3.06224	1.49882	-2.0431	0.0410423	NA			ort004128	17.5844	-7.28875	3.64147	-2.00159	0.0453283	0.999867			ort010527	22.7678	7.70553	3.64705	2.11282	0.0346165	NA			ort004297	629.996	-3.2488	1.5455	-2.10209	0.035545	NA			ort003388	36.7972	6.6464	3.11175	2.1359
ort002462	311.291	3.7631	1.72908	2.17636	0.0295284	0.681382			ort004495	1363.29	-2.93818	1.43835	-2.04274	0.0410778	0.85498			ort006964	17.5844	-7.28875	3.64147	-2.00159	0.0453283	0.999867			ort007679	280.396	3.55836	1.68913	2.10662	0.0351507	NA			ort008655	36.9835	6.31547	3.00472	2.10185	0.0355668	NA			ort000105	305.443	3.62426	1.69688	2.13583
ort008024	273.716	3.79373	1.74411	2.17517	0.0296176	0.681382			ort001020	79.042	-4.05702	1.98614	-2.04267	0.041085	NA			ort005164	163.686	3.29545	1.65	1.99724	0.0457987	0.999867			ort007856	160.384	-3.76874	1.79217	-2.10289	0.0354753	NA			ort001307	528.292	-3.28798	1.56471	-2.10134	0.0356113	NA			ort000248	277.463	3.65808	1.71581	2.13199
ort000267	59.8134	-4.59502	2.11405	-2.17356	0.0297384	NA			ort002902	3777.93	-2.8839	1.41257	-2.04159	0.0411921	0.85498			ort008152	14.6721	7.60761	3.8127	1.99533	0.0460064	0.999867			ort005956	293.993	-3.51744	1.67397	-2.10126	0.0356185	NA			ort005908	239.576	-3.57597	1.70266	-2.10022	0.0357094	NA			ort000988	50.5856	5.50347	2.58297	2.13068
ort003934	49272.7	-3.5052	1.6154	-2.16987	0.0300168	0.686456			ort000667	293.321	-3.21279	1.57378	-2.04146	0.0412055	NA			ort001385	1313.18	-2.87933	1.44411	-1.99384	0.0461693	0.999867			ort008406	45.8783	5.23597	2.49273	2.1005	0.0356852	NA			ort011439	71.5145	-4.65742	2.2222	-2.09586	0.036095	NA			ort002291	50.5111	-6.17941	2.90572	-2.12664
ort008297	78.8442	-4.32997	1.99551	-2.16986	0.0300177	NA			ort009839	4078.29	2.87914	1.4109	2.04063	0.0412874	0.85498			ort009795	118.559	-3.47517	1.74361	-1.9931	0.046251	0.999867			ort007183	186.631	-3.68173	1.75426	-2.09873	0.0358408	NA			ort005565	1259.26	-3.12193	1.48976	-2.0956	0.0361179	0.898875			ort000092	2594.33	-3.1716	1.49246	-2.12508
ort003932	178.76	3.92447	1.80965	2.16864	0.0301101	NA			ort009479	272.713	3.22537	1.58201	2.03878	0.041472	NA			ort005469	380.99	-3.0294	1.52046	-1.99243	0.0463242	0.999867			ort000816	1455.39	-3.2564	1.55222	-2.0979	0.0359138	NA			ort001239	278.332	-3.47976	1.66358	-2.09173	0.0364627	NA			ort000607	6914.87	-3.13036	1.47343	-2.12454
ort004336	15.4638	-7.95189	3.66685	-2.16859	0.030114	NA			ort004446	20.0917	-7.60777	3.7329	-2.03803	0.0415466	NA			ort003898	85.4474	-3.69787	1.85948	-1.98866	0.0467383	0.999867			ort011251	1475.29	-3.25386	1.55147	-2.09727	0.0359698	NA			ort002441	958.817	-3.14171	1.50331	-2.08987	0.0366297	0.904808			ort008450	62.3117	5.05603	2.38169	2.12287
ort005044	130.943	4.06886	1.8798	2.16451	0.0304251	NA			ort008445	20.0917	-7.60777	3.7329	-2.03803	0.0415466	NA			ort009094	158.386	3.28668	1.65289	1.98844	0.0467631	0.999867			ort002311	1654.84	3.23478	1.54621	2.09207	0.0364321	NA			ort011401	118.089	4.01496	1.92287	2.08801	0.0367971	NA			ort004543	24.0598	8.49036	4.0002	2.12248
ort007677	196.19	3.87501	1.79071	2.16396	0.0304675	NA			ort009919	89.0915	-3.89829	1.91871	-2.03172	0.042182	NA			ort004958	371.017	3.01305	1.51698	1.98622	0.0470093	0.999867			ort009636	61.231	-4.53628	2.16979	-2.09065	0.0365592	NA			ort001711	286.76	-3.4535	1.65468	-2.08711	0.036878	NA			ort002493	739.257	3.3116	1.56048	2.12217
ort010603	68.5924	-4.42278	2.04666	-2.16097	0.0306973	NA			ort001211	568.13	-3.01064	1.48476	-2.02769	0.0425915	0.875595			ort001760	17.1754	-7.2548	3.65337	-1.98579	0.0470571	0.999867			ort008181	21.9246	7.65109	3.6636	2.0884	0.0367614	NA			ort010846	386.257	-3.30749	1.59374	-2.0753	0.0379587	NA			ort009928	1017.8	-3.25935	1.53615	-2.12177
ort009612	42897.2	-3.48476	1.61295	-2.16049	0.0307349	0.698719			ort001113	17.9178	7.76921	3.83809	2.02424	0.0429458	NA			ort001131	362.798	-3.02323	1.52253	-1.98567	0.0470701	0.999867			ort001056	43.3638	-5.05666	2.42503	-2.0852	0.0370511	NA			ort002769	171.565	3.68437	1.77626	2.07423	0.0380584	NA			ort011440	173.83	3.90039	1.83934	2.12054
ort000571	26.1124	-6.24622	2.89326	-2.15889	0.030859	NA			ort008448	19.6452	-7.57534	3.74487	-2.02286	0.0430877	NA			ort006854	133.07	-3.38628	1.7055	-1.98551	0.047088	0.999867			ort007050	160.943	3.73182	1.7908	2.08389	0.0371706	NA			ort010646	62.2561	-4.78395	2.3084	-2.07241	0.0382271	NA			ort006496	271.963	3.62689	1.7126	2.11776
ort002323	26.1124	-6.24622	2.89326	-2.15889	0.030859	NA			ort010195	46.5805	4.64856	2.29945	2.02159	0.0432184	NA			ort007390	735.937	2.90474	1.46344	1.98487	0.0471585	0.999867			ort004249	1020.6	3.24724	1.55914	2.08272	0.0372772	NA			ort010643	1878.42	3.02195	1.45897	2.0713	0.0383312	0.936436			ort009405	83.0143	4.60659	2.17542	2.11756
ort005414	26.1124	-6.24622	2.89326	-2.15889	0.030859	NA			ort003994	86.8591	-3.85919	1.91829	-2.01179	0.0442426	NA			ort010489	214.007	-3.17019	1.59749	-1.98448	0.0472021	0.999867			ort005779	613.864	-3.30233	1.58651	-2.0815	0.037388	NA			ort008171	374.161	-3.30659	1.59655	-2.07109	0.0383508	NA			ort006381	2424.96	-3.15525	1.49042	-2.11702
ort009260	120.361	4.10108	1.90077	2.15759	0.0309596	NA			ort007524	6312.72	-2.79947	1.3924	-2.01053	0.0443749	0.900871			ort010590	98.248	3.54161	1.78466	1.98447	0.0472033	0.999867			ort005376	536.865	3.32794	1.59909	2.08115	0.03742	NA			ort007673	201.487	3.5756	1.72683	2.07062	0.0383946	NA			ort007136	30.9125	-7.9334	3.74912	-2.11607
ort005263	438.446	3.64756	1.69085	2.15724	0.0309868	0.699356			ort000673	31.8137	-5.80257	2.88706	-2.00986	0.0444465	NA			ort006059	23.6398	5.82796	2.93803	1.98363	0.0472972	0.999867			ort006995	1860.7	3.19984	1.53755	2.08112	0.0374225	NA			ort001857	2663.35	-2.99652	1.44777	-2.06975	0.0384759	0.936436			ort007587	30.9125	-7.9334	3.74912	-2.11607
ort001602	51.0402	5.0728	2.35235	2.15648	0.0310462	NA			ort000547	900.233	-2.89952	1.44271	-2.00976	0.0444561	0.900871			ort001133	287.38	-3.07066	1.54948	-1.98174	0.0475087	0.999867			ort008848	437.247	-3.36066	1.61513	-2.08073	0.0374584	NA			ort011192	891.562	3.08467	1.49426	2.06435	0.0389845	0.936888			ort011619	30.9125	-7.9334	3.74912	-2.11607
ort003994	95.666	-4.1526	1.92596	-2.15612	0.0310746	NA			ort006322	52.2457	-4.48067	2.23128	-2.00811	0.0446311	NA			ort006674	73.1834	-3.80359	1.92255	-1.9784	0.0478831	0.999867			ort010739	1611.41	-3.20031	1.53955	-2.07873	0.0376418	NA			ort005779	728.265	-3.11775	1.51087	-2.06355	0.0390606	0.936888			ort008534	101.655	4.35765	2.06005	2.11531
ort011073	169.184	-3.86517	1.79288	-2.15585	0.0310955	NA			ort001100	19.1987	-7.54218	3.75766	-2.00715	0.0447339	NA			ort005617	407.352	-2.97898	1.50646	-1.97746	0.0479891	0.999867			ort001307	384.752	-3.37943	1.62689	-2.07723	0.03778	NA			ort009932	575.077	-3.16218	1.53342	-2.06217	0.0391912	NA			ort004231	1987.43	-3.14848	1.49312	-2.10865
ort005607	55865.9	-3.4733	1.61141	-2.15545	0.031127	0.699356			ort006327	19.1987	-7.54218	3.75766	-2.00715	0.0447339	NA			ort004133	513.63	-2.93762	1.48571	-1.97725	0.0480137	0.999867			ort001685	282.134	-3.45273	1.66527	-2.07337	0.0381375	NA			ort002893	22.351	8.04953	3.90975	2.05884	0.03951	NA			ort005812	30.5488	-7.91633	3.75501	-2.10821
ort008822	202.827	-3.80068	1.76338	-2.15533	0.0311358	NA			ort008721	38608.2	2.7705	1.38231	2.00426	0.0450426	0.906283			ort010427	901.75	-2.86526	1.45033	-1.9756	0.0482006	0.999867			ort003468	36.0096	5.90034	2.84594	2.07325	0.0381489	NA			ort007103	1379.75	-3.01283	1.4647	-2.05696	0.0396898	0.945114			ort011379	30.5488	-7.91633	3.75501	-2.10821
ort001321	94.9296	-4.14082	1.92608	-2.14987	0.0315658	NA			ort001181	111.536	-3.61818	1.80586	-2.00358	0.0451146	NA			ort008564	166.384	-3.24301	1.64309	-1.97373	0.0484121	0.999867			ort004057	554.846	-3.29079	1.5889	-2.07112	0.038348	NA			ort003851	60.8803	-4.75052	2.311	-2.05562	0.0398194	NA			ort008445	49.0564	-6.13666	2.91234	-2.10712
ort000855	50.3612	5.0529	2.35422	2.14632	0.0318478	NA			ort010750	426.098	-3.01064	1.50276	-2.0034	0.0451342	NA			ort010091	16.7665	-7.22004	3.6658	-1.96957	0.0488881	0.999867			ort001309	18.3812	-7.88868	3.8116	-2.06965	0.0384849	NA			ort006711	104.594	-4.0393	1.96555	-2.05505	0.0398745	NA			ort011434	434.256	-3.4193	1.62338	-2.10628
ort003450	21.3887	7.30287	3.40544	2.14447	0.0319952	NA			ort010568	17.3579	7.7234	3.857	2.00244	0.0452377	NA			ort000930	70.9319	3.75001	1.90412	1.96942	0.0489049	0.999867			ort007136	18.3812	-7.88868	3.8116	-2.06965	0.0384849	NA			ort006458	743.001	-3.08146	1.5023	-2.05116	0.0402512	0.945114			ort000307	352.908	-3.4884	1.65851	-2.10334
ort000160	89.9731	4.2753	1.99476	2.14327	0.0320913	NA			ort004159	33.929	5.20926	2.6065	1.99856	0.0456557	NA			ort003815	430.24	-2.94268	1.49616	-1.96683	0.049203	0.999867			ort000281	3749.48	-3.14181	1.51844	-2.06911	0.038536	0.531181			ort002099	115.315	-3.93274	1.9174	-2.05108	0.0402587	NA			ort009952	23.3724	8.44854	4.01783	2.10276
ort006385	70.5067	4.51961	2.10895	2.14306	0.0321086	NA			ort007931	488.638	2.95519	1.48191	1.99418	0.0461327	NA			ort003770	14.0608	7.54621	3.83795	1.96621	0.0492744	0.999867			ort008766	43.7701	5.16626	2.49859	2.06767	0.038671	NA			ort008824	2972.29	-2.94405	1.43537	-2.05107	0.0402601	0.945114			ort008024	435.154	3.39303	1.61457	2.1015
ort009550	99.197	4.18937	1.95665	2.14109	0.0322666	NA			ort000206	334.609	3.04479	1.52744	1.9934	0.0462176	NA			ort007300	14.0608	7.54621	3.83795	1.96621	0.0492744	0.999867			ort005896	1865.86	3.16321	1.53039	2.06694	0.0387402	NA			ort009518	60.6237	4.66896	2.28008	2.04772	0.0405875	NA			ort005971	41.9728	5.82539	2.77319	2.10061
ort007116	5432.45	-3.45285	1.61274	-2.14098	0.0322759	0.718598			ort002314	334.609	3.04479	1.52744	1.9934	0.0462176	NA			ort009205	341.947	-2.97789	1.51788	-1.96188	0.0497769	0.999867			ort000984	2464.85	3.1496	1.52406	2.06658	0.0387736	NA			ort005728	590.271	-3.11562	1.52227	-2.0467	0.0406877	NA			ort002645	30.1851	-7.89905	3.76102	-2.10024
ort006138	256.181	-3.69748	1.72782	-2.13997	0.0323575	0.718598			ort005207	95.1227	-3.71772	1.86516	-1.99325	0.0462346	NA			ort011588	1424.75	-2.79784	1.42665	-1.96113	0.0498643	0.999867			ort004798	2.03017e+06	-3.1092	1.50469	-2.06634	0.0387965	0.531181			ort005376	368.942	3.24004	1.58345	2.04619	0.0407374	NA			ort011097	30.1851	-7.89905	3.76102	-2.10024
ort004939	49.6822	5.03272	2.35631	2.13585	0.0326915	NA			ort002910	1936.46	2.79566	1.40307	1.99253	0.0463124	0.911583			ort002397	71.5477	-3.76861	1.92206	-1.96071	0.0499126	0.999867			ort004711	464.759	-3.30943	1.60172	-2.06617	0.0388121	NA			ort006474	561.778	-3.1246	1.52727	-2.04587	0.0407693	NA			ort008813	4329.93	-3.08265	1.46782	-2.10016
ort006652	21.0492	7.27979	3.41268	2.13316	0.0329115	NA			ort004529	104.726	-3.62752	1.82282	-1.99006	0.0465841	NA			ort005909	41.91	-4.44962	2.27195	-1.9585	0.0501714	0.999867			ort003222	29.4758	-6.10656	2.9563	-2.06561	0.0388655	NA			ort010198	342.172	-3.26878	1.59777	-2.04584	0.0407722	NA			ort007948	844.797	-3.22142	1.53737	-2.09541
ort006964	14.7274	-7.8815	3.69697	-2.13188	0.0330166	NA			ort003358	73.6842	-3.94945	1.98715	-1.98749	0.046868	NA			ort006322	35.1646	-4.79491	2.45094	-1.95636	0.050423	0.999867			ort008152	21.0813	7.5945	3.68121	2.06304	0.0391085	NA			ort008723	21.8059	8.01391	3.924	2.04228	0.0411237	NA			ort005999	292.058	3.52957	1.68446	2.09537
ort009670	2645.77	-3.44594	1.61642	-2.13183	0.0330207	0.720715			ort007740	27.3233	5.91156	2.97468	1.98729	0.04689	NA			ort005507	1080.77	-2.79978	1.4328	-1.95407	0.0506935	0.999867			ort004077	337.434	3.37597	1.63802	2.06101	0.0393021	NA			ort008766	21.8059	8.01391	3.924	2.04228	0.0411237	NA			ort009014	136.549	4.006	1.91272	2.0944
ort002283	2983.48	3.4392	1.61533	2.12911	0.0332454	0.720715			ort005617	1073.89	-2.82625	1.42259	-1.9867	0.0469559	0.911583			ort009215	10898.1	-2.72997	1.3974	-1.95361	0.0507473	0.999867			ort008704	43.3485	5.1519	2.49989	2.06085	0.0393174	NA			ort009203	581.93	-3.10715	1.52143	-2.04226	0.0411262	NA			ort011225	58.1084	-5.3668	2.56537	-2.09202
ort010054	386.952	3.60136	1.69256	2.12776	0.0333568	0.720715			ort005489	1909.62	-2.78162	1.40071	-1.98586	0.0470493	0.911583			ort007626	59.6926	-3.93295	2.01359	-1.9532	0.0507955	0.999867			ort006566	1427.34	3.16144	1.53466	2.06002	0.0393962	NA			ort003028	1471.92	2.96229	1.45217	2.03991	0.0413595	0.957844			ort007886	171.016	-3.86279	1.8474	-2.09094
ort004235	367.146	3.59941	1.69574	2.12262	0.0337861	0.720715			ort006783	135.354	3.41411	1.72048	1.98439	0.0472118	NA			ort008643	421.652	-2.90977	1.49092	-1.95166	0.0509791	0.999867			ort000441	3437.29	-3.11996	1.51484	-2.0596	0.039437	0.531181			ort009839	15715.5	2.87699	1.4105	2.03969	0.0413812	0.957844			ort009496	171.016	-3.86279	1.8474	-2.09094
ort008172	246.159	3.69249	1.74094	2.12098	0.0339238	0.720715			ort009395	306.73	-3.05043	1.53791	-1.9835	0.0473118	NA			ort004072	111.297	3.37016	1.72685	1.95163	0.0509827	0.999867			ort001263	2250.95	-3.13386	1.52178	-2.05934	0.0394618	NA			ort006915	520.76	3.10826	1.52843	2.03363	0.041989	NA			ort010881	240.079	-3.63602	1.73978	-2.08993
ort000246	3164.12	-3.41668	1.61135	-2.12038	0.0339738	0.720715			ort001476	16.798	7.6761	3.87736	1.97972	0.047735	NA			ort002879	908.685	-2.80555	1.43843	-1.95042	0.0511258	0.999867			ort002193	2203.59	3.13421	1.52241	2.05871	0.0395221	NA			ort000628	431.122	-3.15143	1.5524	-2.03003	0.0423536	NA			ort006384	110.602	-4.25635	2.03907	-2.0874
ort001921	257.596	-3.64948	1.72131	-2.12018	0.0339912	0.720715			ort007226	16.798	7.6761	3.87736	1.97972	0.047735	NA			ort008535	998.334	2.79207	1.43258	1.94899	0.0512969	0.999867			ort000562	556.615	3.25514	1.58317	2.05609	0.0397743	NA			ort006094	22.9296	-7.83697	3.86285	-2.02881	0.0424781	NA			ort007080	29.4578	-7.86386	3.77344	-2.084
ort005971	48.6637	5.00191	2.35957	2.11984	0.0340197	NA			ort009421	119.569	3.48192	1.75884	1.97968	0.0477399	NA			ort007683	28.0102	-5.48594	2.81495	-1.94886	0.0513123	0.999867			ort008615	58.4481	4.56334	2.21972	2.05582	0.0398001	NA			ort004529	71.6011	-4.38473	2.1633	-2.02687	0.0426757	NA			ort008085	287.246	3.50351	1.68161	2.08343
ort004227	2532.43	-3.41344	1.61279	-2.11648	0.0343037	0.720715			ort001399	203.19	3.18794	1.61038	1.97963	0.0477456	NA			ort004934	61.5552	3.81274	1.95826	1.947	0.0515346	0.999867			ort009602	148.123	3.68687	1.79549	2.0534	0.0400335	NA			ort003094	387.694	-3.17255	1.56603	-2.02586	0.0427795	NA			ort007453	9569.83	-3.01876	1.44929	-2.08292
ort006118	105.026	4.07281	1.92572	2.11496	0.0344335	NA			ort010603	61.8488	-4.12178	2.08472	-1.97714	0.0480261	NA			ort010197	348.688	-2.93392	1.50792	-1.94567	0.0516945	0.999867			ort006647	50.6875	4.78107	2.32943	2.05246	0.0401249	NA			ort008047	187.236	-3.49393	1.72494	-2.02554	0.0428124	NA			ort001102	22.685	8.40547	4.03687	2.08218
ort006276	244.122	3.67957	1.74007	2.11461	0.0344628	NA			ort009931	37.2849	-5.01315	2.53639	-1.97649	0.048099	NA			ort001030	232.598	3.03103	1.55824	1.94516	0.0517554	0.999867			ort007730	844.055	-3.17946	1.55081	-2.05019	0.0403459	NA			ort001449	83.239	-4.1768	2.06485	-2.02281	0.0430924	NA			ort010792	283.805	-3.52488	1.69309	-2.08192
ort011650	17309.3	-3.38674	1.60162	-2.11457	0.0344665	0.720715			ort002130	225.66	-3.14233	1.58989	-1.97644	0.0481051	NA			ort001015	974.9	-2.78544	1.43257	-1.94437	0.051851	0.999867			ort004557	165.628	-3.59624	1.75452	-2.0497	0.0403935	NA			ort005773	103.456	3.91781	1.93863	2.02091	0.0432888	NA			ort004128	47.238	-6.08138	2.9212	-2.08181
ort011156	99.2905	-4.0182	1.90041	-2.11438	0.0344828	NA			ort004282	381.102	-2.9707	1.50334	-1.97607	0.0481469	NA			ort006779	375.665	-2.91353	1.49886	-1.94383	0.0519163	0.999867			ort011379	17.7883	-7.84137	3.82886	-2.04796	0.0405636	NA			ort008146	2965.08	-2.86865	1.41959	-2.02076	0.0433047	0.993092			ort008515	1090.18	3.13689	1.50786	2.08036
ort011638	171.675	-3.74925	1.77632	-2.11069	0.0347992	NA			ort010398	149.615	-3.34103	1.69131	-1.97541	0.0482216	NA			ort005667	351.863	2.91056	1.50067	1.9395	0.0524399	0.999867			ort005948	473.858	3.25025	1.59073	2.04324	0.0410286	NA			ort002827	6086.15	-2.83894	1.40656	-2.01836	0.0435539	0.993092			ort008699	174.921	3.76289	1.81208	2.07656
ort010957	11936.5	-3.37853	1.60121	-2.10999	0.0348592	0.720715			ort004851	18.3058	-7.47346	3.78494	-1.97453	0.0483218	NA			ort010296	208.95	3.05139	1.57336	1.93941	0.0524517	0.999867			ort006811	81.7204	-4.05483	1.98512	-2.04261	0.041091	NA			ort000562	779.383	2.98148	1.47894	2.01596	0.043804	0.993092			ort007319	471.219	3.29242	1.58796	2.07336
ort008395	60305.2	-3.36608	1.59808	-2.10632	0.0351764	0.720715			ort011159	18.3058	-7.47346	3.78494	-1.97453	0.0483218	NA			ort011040	671.398	-2.81071	1.44937	-1.93927	0.0524687	0.999867			ort003185	34.323	5.82996	2.85537	2.04175	0.0411761	NA			ort000062	281.689	-3.25478	1.61677	-2.01313	0.0441007	NA			ort006377	3315.11	3.02231	1.45852	2.07217
ort000242	42085.8	-3.36572	1.59821	-2.10593	0.0352101	0.720715			ort007464	886.908	2.81604	1.42635	1.97429	0.0483486	0.911583			ort004691	34.3467	-4.75972	2.45498	-1.9388	0.0525256	0.999867			ort005282	26660.8	-3.04983	1.49407	-2.04128	0.0412226	0.531181			ort001592	20.7156	7.93991	3.95432	2.00791	0.044653	NA			ort008169	1583.79	3.07141	1.48264	2.07159
ort005703	53921.3	-3.36243	1.59768	-2.10458	0.0353283	0.720715			ort009579	510.973	-2.89716	1.46861	-1.97271	0.0485282	NA			ort006647	41.1704	4.25815	2.1972	1.93799	0.0526243	0.999867			ort002379	243.435	-3.3988	1.66914	-2.03626	0.0417246	NA			ort003707	20.7156	7.93991	3.95432	2.00791	0.044653	NA			ort000562	640.676	3.20824	1.54874	2.07152
ort011125	4364.79	-3.37394	1.60401	-2.10344	0.0354274	0.720715			ort001696	615.608	-2.86122	1.45126	-1.97154	0.048662	0.911583			ort010020	280.101	2.96002	1.52752	1.9378	0.0526481	0.999867			ort000983	138.676	3.67327	1.80406	2.03612	0.0417385	NA			ort009168	177.978	-3.47139	1.72943	-2.00725	0.0447232	NA			ort005780	73.0267	4.59095	2.22096	2.0671
ort002810	414.738	3.52557	1.67847	2.10046	0.0356882	0.720715			ort005471	1080.04	-2.78767	1.41478	-1.97039	0.0487932	0.911583			ort007132	1691.51	2.73243	1.41054	1.93715	0.0527267	0.999867			ort005469	525.792	-3.20502	1.57491	-2.03506	0.0418451	NA			ort006907	86.9943	-4.06442	2.02687	-2.00527	0.0449345	NA			ort001051	1111.19	-3.09841	1.50059	-2.0648
ort009421	111.873	3.98919	1.89954	2.10008	0.035722	NA			ort010733	824.429	-2.81674	1.42961	-1.97028	0.0488064	0.911583			ort001100	15.9486	-7.14789	3.69225	-1.93592	0.0528779	0.999867			ort001051	1305.47	-3.10196	1.52434	-2.03496	0.0418551	NA			ort006995	1810.4	2.85632	1.42522	2.00412	0.0450571	0.999494			ort001352	55.9263	-5.31022	2.57233	-2.06436
ort003983	212.228	-3.65411	1.74013	-2.09991	0.0357371	NA			ort005760	1167.7	-2.7802	1.41109	-1.97026	0.0488091	0.911583			ort000428	13.4495	7.48208	3.86559	1.93556	0.0529219	0.999867			ort007103	935.144	-3.1256	1.53719	-2.03333	0.0420195	NA			ort010797	37509.3	2.78524	1.38979	2.00407	0.0450623	0.999494			ort001802	500.573	-3.256	1.5786	-2.06258
ort007778	205.868	3.69806	1.7611	2.09986	0.0357414	NA			ort008171	309.189	-3.00938	1.52912	-1.96805	0.0490626	NA			ort001744	13.4495	7.48208	3.86559	1.93556	0.0529219	0.999867			ort006968	1383.93	3.07885	1.51909	2.02677	0.0426855	NA			ort002012	417.451	3.08443	1.54059	2.00211	0.0452729	NA			ort001335	322.221	3.39322	1.64592	2.0616
ort001631	163.483	3.78667	1.80354	2.09958	0.0357658	NA			ort005375	1976.19	-2.7346	1.3908	-1.96621	0.0492742	0.911583			ort002334	13.4495	7.48208	3.86559	1.93556	0.0529219	0.999867			ort004601	1241.6	3.08321	1.52226	2.02542	0.0428239	NA			ort005579	22.0124	-7.77807	3.88605	-2.00154	0.0453344	NA			ort011648	21.9976	8.36107	4.05693	2.06093
ort009793	40.3856	-4.84488	2.30847	-2.09874	0.0358398	NA			ort005845	1200.98	-2.76542	1.40739	-1.96492	0.0494234	0.911583			ort007486	13.4495	7.48208	3.86559	1.93556	0.0529219	0.999867			ort002201	45.5642	-4.70134	2.32155	-2.02508	0.0428587	NA			ort008773	2577.02	-2.82387	1.41219	-1.99964	0.0455387	0.999494			ort003220	6474.92	-2.97161	1.44203	-2.06071
ort001476	20.0307	7.20823	3.43581	2.09797	0.0359074	NA			ort000191	439.825	2.90538	1.479	1.96443	0.0494805	NA			ort007019	484.596	-2.84235	1.47005	-1.93351	0.0531735	0.999867			ort007754	262.567	-3.33919	1.6501	-2.02363	0.0430085	NA			ort010398	302.845	-3.18593	1.59403	-1.99866	0.0456447	NA			ort000579	55.5626	-5.30057	2.57355	-2.05963
ort002386	187.42	3.71588	1.77508	2.09336	0.0363167	NA			ort011232	147.383	-3.31719	1.68943	-1.96349	0.0495889	NA			ort005328	85.2033	3.49262	1.80728	1.93253	0.0532944	0.999867			ort001596	19.8164	7.50523	3.71077	2.02256	0.043119	NA			ort009759	400.352	3.08562	1.54446	1.99787	0.0457312	NA			ort002717	142.769	-3.90455	1.89735	-2.0579
ort005404	13.991	-7.80749	3.73002	-2.09315	0.0363359	NA			ort006854	142.805	-3.33464	1.69871	-1.96305	0.0496406	NA			ort003482	767.152	2.77594	1.43694	1.93185	0.0533784	0.999867			ort009463	250.036	-3.34895	1.65679	-2.02135	0.0432436	NA			ort009361	86.0771	-4.04821	2.02713	-1.99702	0.0458229	NA			ort001205	1901.89	-3.01807	1.46802	-2.05588
ort009587	13.991	-7.80749	3.73002	-2.09315	0.0363359	NA			ort005821	3009.48	-2.70654	1.37958	-1.96185	0.0497795	0.911583			ort006744	99.3431	-3.40695	1.76626	-1.92891	0.0537424	0.999867			ort006760	236.626	3.37879	1.6716	2.02129	0.0432498	NA			ort009272	5509.62	-2.78829	1.39658	-1.99651	0.0458784	0.999494			ort008535	4045.5	2.97261	1.44612	2.05557
ort008510	203.491	3.68001	1.76006	2.09084	0.0365426	NA			ort008187	431.653	2.90315	1.47985	1.96179	0.0497871	NA			ort007739	992.026	2.74441	1.42338	1.92809	0.0538434	0.999867			ort011558	236.204	3.37597	1.67124	2.02003	0.0433799	NA			ort011557	2417.01	2.8119	1.41055	1.99348	0.0462092	0.999494			ort006939	239.251	3.51255	1.70928	2.05498
ort010723	153.24	3.79331	1.81427	2.09082	0.0365443	NA			ort006566	382.222	-2.9337	1.49585	-1.96123	0.0498519	NA			ort011244	939.942	-2.74978	1.42653	-1.9276	0.0539053	0.999867			ort005836	60.4668	-4.28445	2.12268	-2.01842	0.0435479	NA			ort008362	212.243	3.32472	1.66825	1.99294	0.0462681	NA			ort007226	71.6518	4.56238	2.22301	2.05234
ort007387	29.3974	-5.40235	2.58793	-2.08752	0.0368412	NA			ort006800	96.1291	-3.60951	1.84104	-1.96059	0.0499274	NA			ort004583	541.671	2.8031	1.45563	1.92569	0.0541428	0.999867			ort004843	984.284	-13.6307	6.76656	-2.01443	0.0439647	NA			ort011542	316.123	3.14529	1.5798	1.99095	0.0464868	NA			ort009839	30520.4	2.9274	1.42752	2.05069
ort009496	75.5019	-4.13192	1.97996	-2.08688	0.0368994	NA			ort007934	78.149	3.76405	1.92257	1.95782	0.050251	NA			ort000281	1622.76	-2.70949	1.40705	-1.92566	0.0541472	0.999867			ort005555	173.244	-3.47053	1.72379	-2.01331	0.0440821	NA			ort001065	1582.77	-2.83444	1.42387	-1.99066	0.0465179	0.999494			ort007103	1085.74	-3.06102	1.494	-2.04888
ort001551	19.6912	7.18357	3.44403	2.0858	0.0369964	NA			ort004214	17.8593	-7.43784	3.79923	-1.95772	0.0502627	NA			ort000267	8796.92	-2.66569	1.38527	-1.9243	0.0543165	0.999867			ort003558	87.3072	-3.89998	1.93769	-2.0127	0.044146	NA			ort000588	145.026	3.54221	1.78116	1.98871	0.0467329	NA			ort007066	45.0862	5.33355	2.61002	2.04349
ort004249	1540.07	3.36529	1.61403	2.08502	0.037067	0.720715			ort010876	17.8593	-7.43784	3.79923	-1.95772	0.0502627	NA			ort008562	286.627	2.91602	1.51707	1.92214	0.0545885	0.999867			ort008466	2878.06	-3.00739	1.49426	-2.01263	0.0441539	0.531181			ort006674	172.933	-3.42611	1.72554	-1.98553	0.0470858	NA			ort002652	5493.89	2.92654	1.43392	2.04093
ort011232	87.5659	-4.01744	1.92791	-2.08383	0.0371752	NA			ort002962	26.2034	5.85016	2.98836	1.95765	0.0502712	NA			ort006683	2724.53	-2.67598	1.39394	-1.91972	0.0548929	0.999867			ort007831	18463.2	2.97753	1.48028	2.01147	0.0442758	0.531181			ort005199	76.0868	4.12389	2.07718	1.98534	0.0471071	NA			ort003018	236.726	-3.49808	1.71483	-2.0399
ort000459	324.196	3.53343	1.69612	2.08325	0.0372288	0.720715			ort005472	4124.85	-2.68729	1.37282	-1.9575	0.0502885	0.911583			ort010947	390.196	2.83901	1.48004	1.91819	0.0550865	0.999867			ort001181	128.879	-3.61939	1.79967	-2.01114	0.0443109	NA			ort003979	175.407	3.40471	1.71626	1.98379	0.047279	NA			ort001711	192.274	-3.6228	1.77621	-2.03963
ort008015	64124	-3.31374	1.59149	-2.08216	0.0373277	0.720715			ort007817	11554.1	-2.66998	1.36426	-1.95708	0.0503376	0.911583			ort005871	1495.22	-2.69079	1.40471	-1.91554	0.0554232	0.999867			ort008312	1068.16	3.059	1.52111	2.01103	0.0443227	NA			ort000054	2250.46	-2.7915	1.40756	-1.98322	0.0473433	0.999494			ort001331	261.297	-3.44338	1.68876	-2.039
ort003399	44744.8	-3.3127	1.59152	-2.08147	0.0373907	0.720715			ort002574	2742.82	-2.69821	1.37897	-1.95669	0.0503838	0.911583			ort009447	382.653	2.83526	1.48053	1.91504	0.0554877	0.999867			ort011216	59.8738	-4.2695	2.12308	-2.011	0.0443259	NA			ort011022	474.682	3.00014	1.51276	1.98321	0.0473436	NA			ort010527	31.9852	6.44204	3.15973	2.03879
ort001785	12323	3.31501	1.59334	2.08054	0.0374761	0.720715			ort008813	6243.24	-2.67668	1.36801	-1.95662	0.0503924	0.911583			ort004159	26.4941	4.97238	2.59799	1.91393	0.0556289	0.999867			ort011439	59.8738	-4.2695	2.12308	-2.011	0.0443259	NA			ort009232	1265.38	2.83582	1.43002	1.98306	0.0473611	0.999494			ort011233	198.416	-3.59928	1.76558	-2.03858
ort009415	65.0746	4.39868	2.11545	2.07931	0.0375886	NA			ort000930	61.2449	4.01314	2.0534	1.95439	0.0506552	NA			ort010000	26.4941	4.97238	2.59799	1.91393	0.0556289	0.999867			ort002460	935.699	3.06923	1.5268	2.01024	0.044406	NA			ort001010	905.517	-2.87714	1.45087	-1.98304	0.0473625	0.999494			ort005526	43.9649	-5.9762	2.93912	-2.03333
ort003923	705.434	-3.39827	1.63446	-2.07914	0.0376041	0.720715			ort007831	7356.27	-2.66716	1.36531	-1.95352	0.0507586	0.911583			ort001984	4829.36	-2.64939	1.38449	-1.91362	0.055669	0.999867			ort009643	2813.57	3.00072	1.49338	2.00935	0.0444999	0.531181			ort009504	208.972	3.30006	1.66567	1.98122	0.0475669	NA			ort005600	2044.83	-2.95398	1.45342	-2.03243
ort001247	714.72	3.39982	1.63721	2.07659	0.0378394	0.720715			ort000281	2673.81	-2.69181	1.37799	-1.95343	0.0507685	0.911583			ort006746	128.22	3.18813	1.6665	1.91308	0.0557383	0.999867			ort004066	27.104	-5.98371	2.97806	-2.00926	0.0445095	NA			ort010557	289.385	3.14728	1.59024	1.97912	0.0478024	NA			ort003581	2046.61	-2.95061	1.45272	-2.0311
ort007302	64179.2	-3.30081	1.58987	-2.07615	0.0378796	0.720715			ort002876	85.6331	-3.68963	1.88882	-1.95341	0.0507714	NA			ort000926	159.208	3.08672	1.61387	1.91262	0.0557969	0.999867			ort000492	4458.75	2.98746	1.48706	2.00897	0.04454	0.531181			ort011510	542.73	2.95726	1.49434	1.97897	0.0478193	NA			ort010724	2718.95	2.92475	1.44168	2.02872
ort000559	456.559	3.44934	1.66321	2.07391	0.0380879	0.720715			ort006746	151.471	3.26329	1.67069	1.95326	0.0507888	NA			ort005783	194.787	-3.01853	1.57892	-1.91177	0.0559055	0.999867			ort003807	177.993	3.4604	1.72284	2.00855	0.0445848	NA			ort011434	636.832	-2.924	1.47795	-1.97841	0.0478821	NA			ort010739	4080.5	-2.903	1.43217	-2.02699
ort009021	73.6196	4.24756	2.04831	2.07369	0.038108	NA			ort008674	147.665	3.27332	1.67715	1.95171	0.0509725	NA			ort007831	2447.8	-2.65989	1.39183	-1.91107	0.0559961	0.999867			ort002575	262.817	-3.28498	1.63949	-2.00366	0.0451063	NA			ort003760	375.113	-3.05285	1.5444	-1.97673	0.0480727	NA			ort001856	1163.76	2.98434	1.47483	2.02352
ort008713	19.3517	7.15848	3.45253	2.0734	0.0381352	NA			ort006488	448.217	2.86722	1.47022	1.9502	0.0511518	NA			ort006988	61.9397	-3.75208	1.9634	-1.91101	0.0560027	0.999867			ort008292	107.204	-3.71429	1.8541	-2.00329	0.0451463	NA			ort001056	83.7841	-4.00687	2.02738	-1.97639	0.0481112	NA			ort003391	1715.64	-2.94409	1.45556	-2.02265
ort008637	206.944	3.63023	1.75143	2.07272	0.0381984	NA			ort001331	230.465	-3.06252	1.57168	-1.94856	0.0513478	NA			ort005420	611.71	-2.75629	1.44234	-1.91098	0.0560073	0.999867			ort004293	16.6024	-7.74183	3.86753	-2.00175	0.0453112	NA			ort001346	33.5638	-5.92042	2.99685	-1.97555	0.0482058	NA			ort010517	43.2376	-5.95175	2.94348	-2.02201
ort009203	219.477	-3.57641	1.72693	-2.07096	0.0383623	NA			ort004336	29.1348	-5.67328	2.91177	-1.9484	0.0513673	NA			ort003865	2422.25	-2.6577	1.39151	-1.90994	0.0561415	0.999867			ort000437	2707.86	-2.97648	1.48873	-1.99933	0.0455722	0.531181			ort001856	1243.2	2.81645	1.42649	1.9744	0.0483365	0.999494			ort008939	198.857	3.51439	1.74015	2.01959
ort005499	28.6611	-5.36488	2.59597	-2.06661	0.0387705	NA			ort010662	201.843	3.10745	1.59572	1.94736	0.0514911	NA			ort010054	367.568	2.82733	1.48155	1.90836	0.0563442	0.999867			ort006375	185.01	-3.3988	1.70103	-1.99808	0.0457081	NA			ort005760	2092.78	-2.77282	1.40492	-1.97366	0.0484207	0.999494			ort009202	325.454	3.27106	1.62072	2.01828
ort009798	291.804	-3.49549	1.69188	-2.06604	0.0388246	0.720715			ort009946	77.0292	3.74168	1.92265	1.94611	0.0516416	NA			ort006915	392.034	2.80506	1.47311	1.90417	0.0568883	0.999867			ort005755	5358.59	2.95551	1.47965	1.99744	0.0457774	0.531181			ort000445	21.0952	-7.71667	3.91074	-1.9732	0.0484727	NA			ort010401	121.756	-3.91662	1.94187	-2.01693
ort001169	65.2501	-4.18736	2.02858	-2.06419	0.0389999	NA			ort006118	99.8656	3.51427	1.80669	1.94514	0.0517578	NA			ort010733	330.286	-2.84514	1.49447	-1.90378	0.0569386	0.999867			ort004819	751.148	-3.05786	1.53091	-1.99742	0.0457799	NA			ort006837	326.467	-3.08842	1.56572	-1.97252	0.04855	NA			ort004122	26.5484	-7.71383	3.82898	-2.01459
ort011186	3763.84	-3.28582	1.59381	-2.06161	0.0392445	0.720715			ort008411	500.602	2.83284	1.45639	1.9451	0.0517626	NA			ort001596	12.8381	7.41496	3.89536	1.90354	0.0569707	0.999867			ort002499	650.823	-3.07246	1.53926	-1.99607	0.0459266	NA			ort011420	833.223	-2.86031	1.45082	-1.97151	0.0486653	0.999494			ort009832	68.2147	4.48838	2.22863	2.01396
ort006981	187.306	-3.60118	1.74707	-2.06127	0.0392776	NA			ort005358	167.142	3.18866	1.63965	1.94472	0.0518083	NA			ort002757	12.8381	7.41496	3.89536	1.90354	0.0569707	0.999867			ort009164	653.748	3.07442	1.54047	1.99577	0.0459589	NA			ort000188	19.6253	7.8619	3.98795	1.97141	0.0486766	NA			ort006550	455.921	-3.15362	1.56613	-2.01364
ort003979	106.441	3.91274	1.89898	2.06044	0.0393567	NA			ort000353	2075.09	2.68089	1.37912	1.94391	0.0519059	0.919846			ort003207	91.3708	-3.39187	1.78229	-1.90309	0.0570282	0.999867			ort006613	26.5111	-5.95129	2.98422	-1.99425	0.0461242	NA			ort004837	19.6253	7.8619	3.98795	1.97141	0.0486766	NA			ort002016	54.0626	4.84452	2.40596	2.01355
ort006921	46782.6	-3.26543	1.58556	-2.05948	0.0394485	0.720715			ort011339	634.155	-2.79075	1.43584	-1.94364	0.0519395	0.919846			ort005337	174.348	-3.03555	1.5962	-1.90174	0.0572052	0.999867			ort000110	18.9732	7.4425	3.73229	1.99408	0.0461431	NA			ort004489	157.218	3.43585	1.74325	1.97095	0.0487299	NA			ort009232	350.037	3.22488	1.60334	2.01135
ort004092	47.6919	-4.4862	2.18006	-2.05784	0.0396057	NA			ort004958	476.759	2.83819	1.46047	1.94334	0.051975	NA			ort007233	94.7865	3.32732	1.75127	1.89995	0.05744	0.999867			ort004355	18.9732	7.4425	3.73229	1.99408	0.0461431	NA			ort007629	103.391	-3.76434	1.91298	-1.96779	0.0490924	NA			ort008806	1890.79	-2.88974	1.44209	-2.00385
ort011169	44.9292	4.88297	2.373	2.05772	0.0396173	NA			ort001219	5910.07	-2.64368	1.36169	-1.94147	0.0522014	0.919846			ort007319	159.006	3.04575	1.60604	1.89644	0.0579021	0.999867			ort009272	3284.39	-2.95649	1.48299	-1.99361	0.0461949	0.531181			ort003866	5627.87	-2.71801	1.38154	-1.96737	0.0491402	0.999494			ort003850	1675.92	-2.89449	1.44605	-2.00164
ort004828	27602.7	-3.25826	1.58501	-2.05568	0.0398136	0.720715			ort003983	379.323	-2.88038	1.48595	-1.93841	0.0525727	NA			ort005971	25.8828	4.93761	2.60415	1.89605	0.0579532	0.999867			ort000061	2703.87	-2.96065	1.48561	-1.99289	0.0462733	0.531181			ort004092	33.1052	-5.90024	3.00083	-1.9662	0.0492755	NA			ort010633	8177.13	2.81358	1.40819	1.99801
ort002879	371.04	-3.42645	1.66689	-2.0556	0.0398215	0.720715			ort004889	2819.45	2.65157	1.36918	1.93662	0.0527919	0.924511			ort001856	344.329	2.81129	1.4828	1.89593	0.0579687	0.999867			ort002658	489.794	-3.10443	1.55889	-1.99143	0.0464338	NA			ort000844	200.336	3.27126	1.66653	1.96292	0.0496556	NA			ort008812	964.951	-2.94835	1.47607	-1.99743
ort011340	39477.9	-3.25488	1.58433	-2.05443	0.0399344	0.720715			ort009405	36.6152	4.71894	2.44022	1.93382	0.0531353	NA			ort007280	1477.69	2.63518	1.39347	1.89109	0.058612	0.999867			ort005492	755.585	3.0416	1.52834	1.99013	0.0465764	NA			ort000426	189.875	-3.30513	1.68428	-1.96234	0.049723	NA			ort007183	211.349	-3.43628	1.72178	-1.99577
ort005176	1733.81	-3.28893	1.60141	-2.05377	0.0399977	0.720715			ort006474	348.615	-2.89014	1.49483	-1.93343	0.0531833	NA			ort006557	1807.68	-2.62282	1.38823	-1.88932	0.0588485	0.999867			ort008835	5924.99	2.93434	1.47493	1.98948	0.0466485	0.531181			ort000248	210.98	3.24121	1.65224	1.96171	0.0497958	NA			ort006385	109.336	3.88978	1.94934	1.99543
ort003907	139500	-3.24992	1.58328	-2.05265	0.0401063	0.720715			ort011119	4259.25	-2.63144	1.36137	-1.93294	0.0532432	0.926693			ort007645	711.31	2.68557	1.42167	1.88902	0.058889	0.999867			ort005652	323.771	-3.18649	1.6021	-1.98894	0.0467075	NA			ort009701	415.841	2.98002	1.51926	1.96149	0.0498219	NA			ort001181	205.206	-3.4516	1.73012	-1.99501
ort007080	13.2547	-7.72949	3.7664	-2.05222	0.0401482	NA			ort000945	15.6781	7.57656	3.92174	1.93194	0.053367	NA			ort003079	1173.92	-2.63666	1.3987	-1.88508	0.0594195	0.999867			ort010100	631.731	3.06105	1.53928	1.98863	0.0467422	NA			ort008817	65.6394	-4.25303	2.16931	-1.96055	0.0499317	NA			ort003835	1231.24	2.90401	1.45653	1.99379
ort007587	13.2547	-7.72949	3.7664	-2.05222	0.0401482	NA			ort006964	16.9663	-7.36384	3.8306	-1.92237	0.0545589	NA			ort004478	1160.64	-2.6366	1.39894	-1.88471	0.059469	0.999867			ort001714	62.6672	-4.13575	2.08058	-1.98778	0.0468356	NA			ort010662	549.297	2.90592	1.48288	1.95965	0.0500362	NA			ort011123	192.921	-3.48565	1.7484	-1.99362
ort009010	38.1765	-4.76082	2.32108	-2.05112	0.0402554	NA			ort003058	241.13	2.97334	1.54694	1.92207	0.0545963	NA			ort006488	438.116	2.7339	1.45267	1.88198	0.0598381	0.999867			ort002522	323.784	3.18781	1.60443	1.98688	0.0469352	NA			ort006405	2157.02	-2.73406	1.39603	-1.95845	0.0501776	0.999494			ort004837	19.9353	8.21905	4.12405	1.99295
ort007493	67582.4	-3.24532	1.58288	-2.05027	0.0403385	0.720715			ort011300	36.0553	4.69586	2.44361	1.92169	0.0546447	NA			ort003095	14.7218	-7.03241	3.73736	-1.88165	0.0598831	0.999867			ort006282	4686.01	-2.91884	1.47297	-1.9816	0.0475243	0.531181			ort011619	20.6366	-7.68496	3.92408	-1.95841	0.0501818	NA			ort005774	19.9353	8.21905	4.12405	1.99295
ort010591	208.699	3.57077	1.74253	2.04919	0.0404439	NA			ort009178	839.833	-12.9925	6.76655	-1.92011	0.0548441	0.948736			ort005839	14.7218	-7.03241	3.73736	-1.88165	0.0598831	0.999867			ort005565	729.381	-3.01877	1.52424	-1.9805	0.0476469	NA			ort009295	534.379	2.90796	1.48515	1.95803	0.0502266	NA			ort010213	359.093	3.1657	1.58885	1.99245
ort000580	4334.14	3.25807	1.58996	2.04915	0.040447	0.720715			ort004077	503.281	2.77144	1.44392	1.91939	0.0549349	NA			ort005908	165.558	-3.00486	1.59725	-1.88127	0.0599352	0.999867			ort003707	18.5516	7.41008	3.7438	1.97929	0.047783	NA			ort003463	819.901	13.246	6.76654	1.95758	0.0502792	0.999494			ort001227	239.516	-3.35606	1.68481	-1.99195
ort009159	184.361	-3.57641	1.74578	-2.04861	0.0405006	NA			ort000982	110.61	3.35907	1.75239	1.91685	0.0552572	NA			ort001010	979.766	-2.63671	1.40305	-1.87927	0.0602073	0.999867			ort000043	5380.26	2.91074	1.4707	1.97915	0.0477989	0.531181			ort008852	32.6466	-5.87977	3.00478	-1.95681	0.0503702	NA			ort008312	786.876	2.95602	1.48622	1.98895
ort010638	37794.4	-3.24132	1.58265	-2.04804	0.0405564	0.720715			ort004455	448.096	2.78712	1.4544	1.91633	0.0553233	NA			ort009405	25.2714	4.90199	2.61024	1.87798	0.060384	0.999867			ort008750	25.9181	-5.91812	2.99075	-1.97881	0.0478375	NA			ort005098	6235.43	-2.68853	1.37446	-1.95606	0.0504581	0.999494			ort000744	155.338	-3.61968	1.82042	-1.98838
ort005251	406.439	-3.39382	1.65752	-2.04753	0.040606	0.720715			ort008724	74.2295	3.6842	1.92283	1.91603	0.0553613	NA			ort001608	581.655	-2.68551	1.43048	-1.87734	0.0604709	0.999867			ort006966	32456.8	2.89043	1.46226	1.97669	0.0480768	0.531181			ort009730	965.794	-13.2327	6.76654	-1.95561	0.050511	0.999494			ort008824	876.046	-2.93908	1.47871	-1.98759
ort011483	71.243	4.19768	2.05052	2.04713	0.0406456	NA			ort000826	564.035	-2.74189	1.43219	-1.91447	0.0555599	0.949226			ort010830	460.136	2.71186	1.44568	1.87584	0.0606769	0.999867			ort006915	490.249	3.06962	1.55333	1.97616	0.048137	NA			ort001554	7078.6	2.68279	1.37244	1.95475	0.0506125	0.999494			ort008531	4613.55	2.79671	1.40876	1.98523
ort003323	104.404	3.88299	1.89892	2.04484	0.0408706	NA			ort006557	2528.37	-2.60611	1.36148	-1.91417	0.0555979	0.949226			ort003961	1222.76	-2.61302	1.39312	-1.87566	0.0607022	0.999867			ort009646	702.54	-3.01	1.5239	-1.9752	0.048246	NA			ort008152	19.0802	7.82126	4.00578	1.95249	0.0508798	NA			ort002522	217.94	3.36555	1.69548	1.98502
ort011458	10787.5	-3.23275	1.58311	-2.04202	0.0411496	0.720715			ort011551	424.253	2.79045	1.45882	1.91281	0.0557727	NA			ort003523	506.65	-2.69291	1.43824	-1.87237	0.0611551	0.999867			ort003851	42.5995	-4.60041	2.32979	-1.9746	0.0483133	NA			ort001148	107.013	3.66976	1.87962	1.9524	0.0508911	NA			ort009782	52.0003	4.78642	2.41361	1.9831
ort003330	70.564	4.18311	2.05121	2.03934	0.0414162	NA			ort009915	698.379	-2.70344	1.41393	-1.912	0.0558762	0.949226			ort005132	5028.7	-2.55523	1.36552	-1.87125	0.06131	0.999867			ort001239	193.812	-3.31391	1.67858	-1.97424	0.0483548	NA			ort004604	152.037	-3.40875	1.74715	-1.95103	0.0510532	NA			ort005026	41.6491	5.21619	2.63078	1.98275
ort010251	791.69	-3.29953	1.61853	-2.0386	0.04149	0.720715			ort010591	61.9622	-3.88833	2.0358	-1.90998	0.0561358	NA			ort000634	197.848	-2.91006	1.55571	-1.87057	0.0614046	0.999867			ort009635	388.533	-3.10416	1.57259	-1.97392	0.0483906	NA			ort010195	67.9961	4.13207	2.12017	1.94893	0.0513035	NA			ort002873	387.545	-3.12432	1.576	-1.98244
ort007469	102203	-3.21364	1.57877	-2.03553	0.0417974	0.720715			ort010148	359.33	2.81722	1.47678	1.90768	0.0564325	NA			ort002696	12.2268	7.34457	3.9282	1.8697	0.061525	0.999867			ort007226	30.95	5.67795	2.87765	1.97312	0.0484815	NA			ort007645	1796.84	2.72102	1.39673	1.94813	0.0513994	0.999494			ort000801	469.501	-3.06279	1.54527	-1.98204
ort000466	67.0623	-4.08381	2.00627	-2.03552	0.0417984	NA			ort009628	15.1182	7.52409	3.94636	1.90659	0.0565734	NA			ort000559	414.265	2.71367	1.45175	1.86924	0.0615897	0.999867			ort003663	1237.25	-2.94627	1.4947	-1.97114	0.0487079	NA			ort009977	773.019	13.1611	6.76655	1.94503	0.0517719	0.999494			ort001818	606.948	2.98636	1.50784	1.98055
ort004222	52256.7	-3.20875	1.57838	-2.03295	0.0420579	0.720715			ort007118	1744.28	2.60345	1.36648	1.90522	0.056751	0.958348			ort003599	687.872	2.64395	1.41462	1.86902	0.06162	0.999867			ort007158	12684.1	-2.88038	1.46156	-1.97075	0.0487523	0.531181			ort007754	423.274	-2.93112	1.50833	-1.94329	0.0519811	NA			ort002252	163.638	3.5234	1.77946	1.98005
ort008963	598.376	3.3192	1.6337	2.03171	0.0421827	0.720715			ort007037	88.9854	-3.48859	1.83806	-1.89797	0.0576999	NA			ort000768	600.044	-2.66101	1.42419	-1.86844	0.0617008	0.999867			ort004910	45.2063	4.60959	2.34129	1.96883	0.0489732	NA			ort001664	41.7167	4.8739	2.51309	1.93941	0.052452	NA			ort007428	694.758	-2.96131	1.49593	-1.97958
ort003322	749.267	-3.28769	1.61867	-2.0311	0.0422444	0.720715			ort009169	2967.13	2.56269	1.35071	1.8973	0.0577884	0.963386			ort007807	130.058	3.06248	1.63993	1.86745	0.0618391	0.999867			ort004816	18.1299	7.37691	3.75581	1.96413	0.0495146	NA			ort000667	241.991	-3.11268	1.60734	-1.93654	0.052802	NA			ort011032	140.508	-3.65835	1.85216	-1.97519
ort008779	771.144	3.29221	1.62097	2.03102	0.0422534	0.720715			ort000888	599.688	12.8334	6.76658	1.89659	0.057882	0.963386			ort006381	1783.94	-2.56834	1.37756	-1.86441	0.0622641	0.999867			ort000571	42.0066	-4.57935	2.33163	-1.96401	0.0495285	NA			ort008292	161.927	-3.32209	1.71694	-1.93489	0.053004	NA			ort004487	40.3282	-5.84957	2.96247	-1.97456
ort000425	226.329	-3.47517	1.71114	-2.03091	0.0422638	NA			ort004296	462.753	2.72703	1.44023	1.89347	0.0582953	NA			ort002100	24.7387	-5.30249	2.84638	-1.86289	0.0624776	0.999867			ort007397	57.7761	4.2085	2.14579	1.96128	0.0498459	NA			ort003599	1357.83	2.71221	1.40176	1.93486	0.0530079	0.999494			ort007615	1325.24	-13.3546	6.76651	-1.97363
ort009169	5606.74	3.2091	1.58246	2.02791	0.0425694	0.720715			ort005288	79.3823	-3.57144	1.88786	-1.8918	0.0585176	NA			ort004504	14.3128	-6.99177	3.75396	-1.86251	0.0625318	0.999867			ort008040	31.0833	-5.1643	2.63401	-1.96062	0.0499234	NA			ort005652	619.838	-2.82045	1.45788	-1.93463	0.0530361	NA			ort001714	730.915	2.93088	1.48516	1.97345
ort006576	3077.09	-3.21712	1.58654	-2.02776	0.0425853	0.720715			ort008266	130.534	3.18291	1.68295	1.89127	0.0585879	NA			ort009102	14.3128	-6.99177	3.75396	-1.86251	0.0625318	0.999867			ort000607	4606.93	-2.86347	1.46188	-1.95876	0.0501408	0.538276			ort006381	2564.81	-2.66702	1.37891	-1.93416	0.0530941	0.999494			ort002460	1037.64	2.87152	1.45621	1.97192
ort002631	69.5455	4.16097	2.05228	2.02748	0.0426129	NA			ort001785	6398.17	2.53075	1.33842	1.89085	0.0586438	0.963386			ort004733	182.519	-2.91266	1.56615	-1.85977	0.0629187	0.999867			ort005852	751.258	-13.241	6.76659	-1.95682	0.0503686	NA			ort010077	174.11	-3.26992	1.69254	-1.93196	0.0533643	NA			ort004137	334.59	3.13545	1.59069	1.97113
ort009405	69.5455	4.16097	2.05228	2.02748	0.0426129	NA			ort002049	29.4495	4.99904	2.64408	1.89065	0.0586708	NA			ort009400	12984.8	-2.51906	1.35508	-1.85898	0.0630306	0.999867			ort002967	37.4457	4.93431	2.52214	1.9564	0.0504179	NA			ort009596	190.507	-3.21383	1.665	-1.93023	0.0535785	NA			ort008704	40.9616	5.19153	2.63535	1.96996
ort009850	77.751	4.05291	2.00031	2.02614	0.0427503	NA			ort005755	1866.49	2.56312	1.35715	1.88861	0.0589444	0.963386			ort002584	303.3	-2.75529	1.48325	-1.8576	0.0632257	0.999867			ort000905	437.44	3.03946	1.55384	1.95609	0.0504546	NA			ort001847	1414.06	-2.69492	1.39716	-1.92886	0.0537484	0.999494			ort010939	19.2479	8.16842	4.14922	1.96867
ort010733	491.791	-3.31814	1.63838	-2.02526	0.0428404	0.720715			ort003028	511.219	2.6968	1.42801	1.8885	0.0589594	NA			ort001269	139.192	-3.01921	1.62618	-1.85662	0.0633647	0.999867			ort006744	284.65	-3.13493	1.60268	-1.95605	0.0504587	NA			ort009711	394.667	2.9109	1.50945	1.92845	0.0537996	NA			ort004625	163.259	-3.5235	1.79008	-1.96835
ort004626	1445.18	-3.23381	1.59714	-2.02476	0.0428921	0.720715			ort007058	1664.04	-2.56739	1.36028	-1.88739	0.0591078	0.963386			ort002049	40.968	3.97239	2.14008	1.85619	0.0634263	0.999867			ort008187	363.194	3.07442	1.5732	1.95424	0.0506725	NA			ort011032	231.27	-3.11129	1.61346	-1.92833	0.0538141	NA			ort005414	49.0165	-5.11482	2.59913	-1.9679
ort004958	360.643	3.37708	1.66822	2.02437	0.0429325	0.720715			ort008113	743.7	2.63478	1.39686	1.88621	0.0592671	0.963386			ort003602	36.5938	-4.2443	2.28983	-1.85355	0.0638038	0.999867			ort005869	415.11	-3.03584	1.55484	-1.95251	0.0508781	NA			ort000363	134.123	3.41936	1.77343	1.9281	0.0538424	NA			ort011420	102.098	3.86755	1.96533	1.96789
ort001345	828.416	-13.6946	6.7666	-2.02385	0.042986	0.720715			ort008949	16.0734	-7.28583	3.86487	-1.88514	0.0594107	NA			ort007730	555.078	-2.63368	1.42217	-1.85187	0.0640451	0.999867			ort000032	15.4165	-7.63492	3.91127	-1.95203	0.0509346	NA			ort002997	2196.49	2.66075	1.38	1.92808	0.0538451	0.999494			ort009440	139.053	-3.64214	1.85152	-1.96712
ort003345	164.593	-3.55555	1.75712	-2.02351	0.0430207	NA			ort007757	1594.25	-2.56332	1.36031	-1.88437	0.0595151	0.963386			ort005162	147.593	2.964	1.60097	1.85138	0.0641145	0.999867			ort004905	15.4165	-7.63492	3.91127	-1.95203	0.0509346	NA			ort003383	19.7194	-7.61937	3.95221	-1.92788	0.0538702	NA			ort000844	144.634	3.56426	1.81453	1.96429
ort005070	741.096	3.27896	1.62059	2.02332	0.0430401	0.720715			ort003705	26.4559	-5.53126	2.94104	-1.88072	0.0600102	NA			ort006134	226.457	-2.81817	1.52255	-1.85096	0.0641757	0.999867			ort005913	15.4165	-7.63492	3.91127	-1.95203	0.0509346	NA			ort008258	19.7194	-7.61937	3.95221	-1.92788	0.0538702	NA			ort006981	421.048	-3.04967	1.55263	-1.9642
ort010501	352.098	3.37637	1.66977	2.02206	0.04317	0.720715			ort010715	168.942	-3.02554	1.60872	-1.88071	0.0600113	NA			ort005785	1079.27	-2.56637	1.38652	-1.85094	0.0641784	0.999867			ort008949	15.4165	-7.63492	3.91127	-1.95203	0.0509346	NA			ort007745	526.401	2.8361	1.47114	1.92783	0.0538764	NA			ort011644	658.55	-2.93178	1.49326	-1.96334
ort002634	585.979	-3.29091	1.62754	-2.02201	0.0431754	0.720715			ort005256	14.5582	7.46964	3.97251	1.88033	0.0600625	NA			ort009295	235.874	2.78687	1.5093	1.84647	0.0648245	0.999867			ort009529	1229.27	2.89955	1.48589	1.95139	0.0510104	NA			ort006488	985.749	2.72735	1.41551	1.92677	0.0540084	0.999494			ort006674	137.962	-3.62987	1.85104	-1.96099
ort002497	160.572	-3.55858	1.76076	-2.02105	0.0432743	NA			ort008028	14.5582	7.46964	3.97251	1.88033	0.0600625	NA			ort010846	319.443	-2.71651	1.47153	-1.84605	0.0648851	0.999867			ort003704	841.96	-2.9274	1.50106	-1.95022	0.0511503	NA			ort008704	46.5364	4.60697	2.39169	1.92624	0.0540748	NA			ort000626	234.385	-3.27126	1.6712	-1.95743
ort003578	35129.8	-3.18271	1.57531	-2.02037	0.0433451	0.720715			ort006498	12353.3	2.49851	1.32943	1.87938	0.060192	0.963386			ort003484	1245.3	2.53917	1.37744	1.8434	0.06527	0.999867			ort003979	169.31	3.31938	1.70228	1.94997	0.0511799	NA			ort001484	721.277	2.77081	1.4386	1.92605	0.0540976	0.999494			ort009141	223.191	-3.29608	1.68426	-1.95699
ort006052	76192.4	-3.18088	1.57472	-2.01996	0.0433871	0.720715			ort005945	319.476	2.77886	1.47929	1.87851	0.0603113	NA			ort000020	536.886	-2.61821	1.42064	-1.84298	0.0653315	0.999867			ort001856	831.966	2.92753	1.5022	1.94883	0.0513159	NA			ort006744	659.399	-2.78778	1.44741	-1.92605	0.0540976	NA			ort000502	24.3663	-7.59009	3.87856	-1.95694
ort002788	49645.1	-3.18043	1.57483	-2.01954	0.0434308	0.720715			ort000378	1129.57	-2.56861	1.36952	-1.87555	0.0607171	0.963386			ort005562	13.9039	-6.94995	3.77146	-1.84277	0.0653619	0.999867			ort005747	353.392	-3.05534	1.56957	-1.94661	0.051582	NA			ort003191	68.0189	-4.07246	2.11651	-1.92414	0.0543375	NA			ort003851	79.4056	-4.18995	2.14214	-1.95596
ort011607	139.66	3.64928	1.80931	2.01694	0.0437015	NA			ort009354	667.937	-12.6621	6.76657	-1.87128	0.0613063	0.963386			ort010821	13.9039	-6.94995	3.77146	-1.84277	0.0653619	0.999867			ort009596	95.516	-3.62361	1.86192	-1.94617	0.0516344	NA			ort007615	826.382	-13.0078	6.76655	-1.92237	0.054559	0.999494			ort007539	609.773	-2.92827	1.49765	-1.95524
ort001399	116.402	3.74097	1.85554	2.01611	0.0437886	NA			ort002387	2074.81	-2.51725	1.34621	-1.86989	0.0614997	0.963386			ort002827	4435.74	-2.48906	1.35286	-1.83985	0.0657908	0.999867			ort009806	56.5113	4.17482	2.14685	1.94462	0.0518202	NA			ort010934	62.4292	-4.17679	2.17351	-1.92168	0.054646	NA			ort007931	575.247	2.93423	1.50099	1.95487
ort003158	1024.07	-3.23284	1.60356	-2.01604	0.0437959	0.720715			ort003396	2461.88	-2.50896	1.34207	-1.86946	0.0615584	0.963386			ort001212	235.652	-2.7796	1.51084	-1.83977	0.0658018	0.999867			ort011510	400.574	3.02313	1.55621	1.94263	0.0520609	NA			ort006630	247.928	3.05679	1.59112	1.92115	0.0547122	NA			ort004604	136.507	-3.61333	1.85041	-1.95272
ort003627	154.373	3.59724	1.78613	2.01399	0.0440108	NA			ort008308	55.0857	3.8502	2.06144	1.86773	0.0617998	NA			ort008280	493.15	-2.61792	1.42472	-1.83749	0.0661372	0.999867			ort010590	182.473	3.2648	1.68088	1.94232	0.0520988	NA			ort003026	44.7431	-4.72015	2.45748	-1.92072	0.0547666	NA			ort004545	596.069	2.90541	1.49266	1.94646
ort006366	766.846	3.25082	1.61587	2.0118	0.0442406	0.720715			ort005857	194.67	2.91632	1.56339	1.86539	0.062127	NA			ort004588	36.2797	4.0655	2.2142	1.83611	0.0663421	0.999867			ort005736	1228.16	-2.86299	1.47811	-1.93692	0.0527547	NA			ort000161	819.962	-12.9966	6.76655	-1.92071	0.0547685	0.999494			ort011512	555.945	-2.92666	1.50395	-1.94599
ort006522	138.641	3.63788	1.80897	2.01102	0.0443237	NA			ort005995	38683.5	-2.46256	1.32024	-1.86524	0.0621475	0.963386			ort004308	81.7418	3.25102	1.77066	1.83605	0.0663506	0.999867			ort008171	179.753	-3.23239	1.67244	-1.93274	0.0532687	NA			ort001181	228.977	-3.09524	1.61159	-1.92062	0.0547796	NA			ort002197	47.5618	-5.07009	2.60558	-1.94586
ort005008	49188.3	-3.16209	1.57252	-2.01085	0.0443417	0.720715			ort004478	1078.55	-2.54361	1.36581	-1.86235	0.0625545	0.963386			ort006903	500.098	-2.61195	1.42283	-1.83574	0.0663956	0.999867			ort004159	17.2867	7.3082	3.78147	1.93264	0.0532811	NA			ort010401	110.988	-3.55144	1.8499	-1.9198	0.0548832	NA			ort004249	1079.12	2.8025	1.44051	1.9455
ort009291	33.3287	5.46792	2.7199	2.01034	0.0443951	NA			ort011532	435.657	2.66369	1.43165	1.86057	0.0628053	NA			ort007295	185.377	-2.84707	1.55126	-1.83532	0.0664578	0.999867			ort007319	342.191	3.02865	1.56856	1.93084	0.0535022	NA			ort009276	230.371	3.08376	1.60688	1.9191	0.0549715	NA			ort006141	379.101	-3.03408	1.56008	-1.94483
ort010132	46842.4	-3.15974	1.57225	-2.0097	0.0444629	0.720715			ort003107	22.8438	5.64853	3.03611	1.86045	0.0628218	NA			ort003707	11.6154	7.27057	3.96389	1.8342	0.0666239	0.999867			ort004625	175.774	-3.23607	1.6762	-1.9306	0.0535325	NA			ort010792	568.528	-2.79927	1.45877	-1.91892	0.0549939	NA			ort003005	18.5605	8.11595	4.17602	1.94347
ort000451	12.5183	-7.64703	3.80681	-2.00878	0.0445607	NA			ort001419	513.784	2.63043	1.41446	1.85967	0.0629319	NA			ort005091	11.6154	7.27057	3.96389	1.8342	0.0666239	0.999867			ort003599	565.865	2.92555	1.5172	1.92826	0.0538232	NA			ort007211	2586.52	-2.62205	1.36916	-1.91508	0.0554823	0.999494			ort008181	18.5605	8.11595	4.17602	1.94347
ort004556	12.5183	-7.64703	3.80681	-2.00878	0.0445607	NA			ort007192	33.2556	4.57456	2.46233	1.85781	0.0631956	NA			ort008222	11.6154	7.27057	3.96389	1.8342	0.0666239	0.999867			ort008258	14.8236	-7.57833	3.93557	-1.9256	0.0541545	NA			ort007003	96.5123	-3.65743	1.91075	-1.91413	0.0556031	NA			ort006915	571.162	2.90483	1.49552	1.94236
ort007486	17.6542	7.02603	3.49976	2.00757	0.0446886	NA			ort008381	96.2791	3.29012	1.77247	1.85624	0.0634194	NA			ort001341	408.986	12.408	6.76667	1.8337	0.0666992	0.999867			ort002099	53.3515	-4.09393	2.12894	-1.92299	0.0544814	NA			ort001702	1513.83	2.6487	1.38532	1.91197	0.0558796	0.999494			ort010846	261.057	-3.1689	1.63403	-1.93932
ort009678	2922.34	-3.17507	1.58164	-2.00745	0.0447012	0.720715			ort002631	46.3536	4.02708	2.17065	1.85524	0.0635616	NA			ort006089	39.7453	3.92585	2.14374	1.83131	0.0670549	0.999867			ort000768	845.662	-2.84529	1.48449	-1.91667	0.0552796	NA			ort001263	604.791	-2.76822	1.44833	-1.91132	0.0559632	NA			ort009571	363.781	3.01677	1.55755	1.93687
ort003280	64.8532	-4.03258	2.00919	-2.00706	0.0447429	NA			ort001133	279.615	-2.76609	1.49106	-1.85512	0.0635798	NA			ort011401	39.7453	3.92585	2.14374	1.83131	0.0670549	0.999867			ort001689	298.525	-3.01386	1.57463	-1.91401	0.0556184	NA			ort005460	280.775	2.97696	1.55872	1.90988	0.0561493	NA			ort001100	23.639	-7.54637	3.89666	-1.93662
ort009876	1784.28	3.18526	1.58903	2.00453	0.0450134	0.720715			ort009486	1188.67	-2.51549	1.35739	-1.85318	0.0638559	0.963386			ort011138	81.1305	3.23905	1.7702	1.82977	0.0672847	0.999867			ort006458	418.483	-2.93182	1.53367	-1.91164	0.0559228	NA			ort009524	329.085	2.91511	1.52795	1.90786	0.0564091	NA			ort005234	2399.05	2.70908	1.39939	1.9359
ort002315	72.1595	-3.9401	1.9662	-2.00391	0.0450794	NA			ort002104	13.9983	7.41306	4.00053	1.85302	0.0638794	NA			ort003512	2811.57	2.47519	1.35328	1.82903	0.0673954	0.999867			ort005971	41.8333	4.49295	2.35076	1.91128	0.055969	NA			ort003380	2700.24	-2.60312	1.36446	-1.90781	0.0564163	0.999494			ort007371	2329.6	-2.71096	1.40075	-1.93536
ort001484	445.585	3.2936	1.64452	2.00278	0.0452013	0.720715			ort006377	1253.07	2.50647	1.35392	1.85127	0.0641306	0.963386			ort000694	1970.89	-2.48704	1.35982	-1.82895	0.0674068	0.999867			ort007182	39.0419	-4.46917	2.34207	-1.90821	0.0563637	NA			ort008177	3335.98	-2.59112	1.35911	-1.90648	0.0565883	0.999494			ort003380	584.998	13.0936	6.76662	1.93503
ort004929	166.71	3.53325	1.76614	2.00055	0.0454413	NA			ort004584	98.9654	3.25626	1.75895	1.85125	0.0641338	NA			ort006280	528.656	2.58204	1.41302	1.82732	0.0676515	0.999867			ort010530	39.0419	-4.46917	2.34207	-1.90821	0.0563637	NA			ort002805	1616.84	2.62434	1.37849	1.90378	0.0569394	0.999494			ort002675	1189.45	-2.76427	1.42987	-1.93324
ort007865	1250.18	3.18678	1.5952	1.99773	0.0457454	0.720715			ort006380	98.9654	3.25626	1.75895	1.85125	0.0641338	NA			ort010313	457.092	2.60274	1.42436	1.82731	0.0676534	0.999867			ort011339	1060.17	-2.80373	1.46969	-1.9077	0.05643	NA			ort000348	519.51	-2.78151	1.46108	-1.90374	0.0569445	NA			ort003599	610.705	2.86239	1.48226	1.9311
ort000348	226.611	-3.39343	1.70057	-1.99546	0.0459927	NA			ort002622	4677.77	2.44766	1.32329	1.84968	0.0643599	0.963386			ort008963	635.9	2.55595	1.39998	1.82571	0.0678947	0.999867			ort006765	1243.37	-2.78343	1.46183	-1.90407	0.0569011	NA			ort011576	7254.79	-2.56217	1.3465	-1.90284	0.0570614	0.999494			ort007001	38.8994	5.11491	2.6498	1.9303
ort005728	402.924	-3.27676	1.64325	-1.99407	0.0461445	0.720715			ort010349	1001.46	2.51998	1.36297	1.84889	0.0644744	0.963386			ort009105	13.495	-6.90688	3.78993	-1.82243	0.0683903	0.999867			ort010517	28.7115	-5.04646	2.65293	-1.90222	0.0571421	NA			ort005080	2946.23	-2.58727	1.35984	-1.90263	0.0570883	0.999494			ort010041	61.3405	4.32792	2.24255	1.92991
ort001596	17.3147	6.99801	3.51027	1.99358	0.0461975	NA			ort001194	75.364	-3.49002	1.88785	-1.84868	0.0645047	NA			ort010306	254.041	-2.71268	1.49026	-1.82027	0.0687177	0.999867			ort007387	169.251	-3.1756	1.66946	-1.90217	0.0571488	NA			ort010247	632.371	12.8714	6.76657	1.9022	0.0571447	NA			ort005224	264.437	3.12018	1.61743	1.9291
ort007666	317.636	3.33061	1.67121	1.99293	0.0462687	0.720715			ort010247	478.742	12.5085	6.76662	1.84856	0.0645216	NA			ort011617	367.588	2.61683	1.44002	1.81722	0.0691829	0.999867			ort007452	75.3264	3.71318	1.95318	1.9011	0.057289	NA			ort004249	1820.93	2.60957	1.37266	1.90111	0.057288	0.999494			ort010463	1191.92	-2.75285	1.42743	-1.92854
ort007685	2176.45	3.14603	1.58153	1.98923	0.0466757	0.720715			ort001341	477.063	12.5034	6.76662	1.84781	0.06463	NA			ort003760	181.288	-2.81035	1.54673	-1.81697	0.0692222	0.999867			ort007455	634.222	2.84097	1.49505	1.90025	0.0574003	NA			ort002772	756.638	-2.70097	1.42173	-1.89978	0.0574624	0.999494			ort001345	1070.66	-13.0469	6.76652	-1.92815
ort006854	357.274	-3.28363	1.6511	-1.98875	0.0467284	0.720715			ort010422	1664.87	-2.47978	1.34243	-1.84723	0.0647143	0.963386			ort007596	742.538	2.5173	1.38668	1.81534	0.0694715	0.999867			ort010905	214.881	-3.07687	1.61954	-1.89985	0.0574534	NA			ort007280	3563.46	2.56545	1.35276	1.89646	0.0578994	0.999494			ort006884	2455.33	-2.69079	1.39558	-1.92808
ort006521	386.839	-3.27033	1.64464	-1.98848	0.0467587	0.720715			ort002675	565.51	-2.58822	1.40117	-1.84719	0.0647197	0.963386			ort006908	2843.2	2.44456	1.34703	1.81478	0.0695573	0.999867			ort004122	14.2306	-7.51944	3.96171	-1.89803	0.0576924	NA			ort001341	614.926	12.831	6.76657	1.89624	0.0579287	NA			ort000768	912.666	-2.78715	1.44561	-1.92802
ort003185	32.3102	5.42212	2.72781	1.98772	0.0468427	NA			ort003094	1060.8	-2.50953	1.35941	-1.84605	0.0648854	0.963386			ort011645	210.189	2.738	1.51151	1.81143	0.0700738	0.999867			ort004871	14.2306	-7.51944	3.96171	-1.89803	0.0576924	NA			ort008983	858.973	2.67226	1.40939	1.89604	0.057955	0.999494			ort008615	83.4578	3.94407	2.04602	1.92768
ort002929	1921.85	3.14547	1.58298	1.98705	0.0469165	0.720715			ort005971	27.7697	4.91158	2.66164	1.84532	0.0649908	NA			ort010827	2389.75	2.44064	1.34794	1.81064	0.070196	0.999867			ort001573	304.955	-2.96725	1.56343	-1.8979	0.0577086	NA			ort005780	49.7208	4.37043	2.30591	1.89532	0.0580501	NA			ort006967	565.063	13.0436	6.76662	1.92763
ort009124	436.419	3.26052	1.6413	1.98655	0.0469728	0.720715			ort008523	335.7	2.68803	1.45681	1.84515	0.0650158	NA			ort009354	544.706	-12.2412	6.76658	-1.80907	0.0704402	0.999867			ort007165	207.515	-3.08149	1.62451	-1.89687	0.0578447	NA			ort003387	116.206	-3.4386	1.81479	-1.89476	0.0581237	NA			ort004187	1008.32	2.76767	1.43608	1.92724
ort001117	307.733	3.32157	1.67249	1.986	0.0470331	0.720715			ort008040	25.1165	-5.45464	2.95815	-1.84394	0.0651922	NA			ort009343	35.057	4.01303	2.21924	1.80829	0.0705611	0.999867			ort000831	267.444	3.00377	1.58472	1.89546	0.0580319	NA			ort000438	189.763	-3.1159	1.64542	-1.89368	0.058268	NA			ort008415	137.558	-3.52437	1.83058	-1.92528
ort008933	706.127	3.20185	1.61239	1.98578	0.0470583	0.720715			ort011569	8232.04	2.42578	1.31584	1.84352	0.0652527	0.963386			ort007116	5419.84	-2.41847	1.3376	-1.80807	0.070595	0.999867			ort001702	904.987	2.78829	1.47155	1.8948	0.0581185	NA			ort000307	209.456	-3.06542	1.61883	-1.8936	0.0582778	NA			ort003028	2096.29	2.68868	1.39776	1.92357
ort000922	621.148	-3.20492	1.61451	-1.98508	0.047136	0.720715			ort001229	179.779	-2.89708	1.57342	-1.84126	0.0655838	NA			ort006365	21316.1	-2.39966	1.33018	-1.804	0.0712308	0.999867			ort009977	787.176	12.8166	6.76652	1.89412	0.0582084	NA			ort000027	185.549	-3.12509	1.65118	-1.89264	0.0584062	NA			ort001593	890.965	-2.77716	1.44469	-1.92233
ort002772	170.37	-3.45258	1.73954	-1.98476	0.0471708	NA			ort006796	36.9519	-4.39213	2.38628	-1.84057	0.0656841	NA			ort001190	1641.84	-2.43961	1.35293	-1.80321	0.0713558	0.999867			ort006085	639.003	-2.81996	1.4896	-1.8931	0.0583442	NA			ort006967	595.301	12.7842	6.76658	1.88932	0.0588488	NA			ort003288	502.708	2.88314	1.50058	1.92135
ort007817	1879.92	-3.13471	1.58094	-1.98282	0.0473872	0.720715			ort008951	290.367	2.71417	1.47558	1.83939	0.0658579	NA			ort008487	1978.52	2.43063	1.34814	1.80295	0.0713967	0.999867			ort011470	1069.61	2.76746	1.46265	1.89208	0.0584798	NA			ort001715	334.298	-2.86527	1.51683	-1.88898	0.0588939	NA			ort006968	1426.8	2.71354	1.41255	1.92103
ort005687	912.379	-3.16835	1.59817	-1.98249	0.0474243	0.720715			ort003941	6480.34	-2.41914	1.3156	-1.83881	0.0659431	0.963386			ort008169	183.889	2.75553	1.53044	1.80049	0.0717839	0.999867			ort009428	1541.93	-2.74047	1.44891	-1.8914	0.0585707	NA			ort004150	168.519	3.15892	1.67348	1.88764	0.0590746	NA			ort007278	299.775	3.04644	1.58599	1.92084
ort002416	249.219	3.36197	1.69614	1.98213	0.0474646	0.720715			ort010846	324.066	-2.68255	1.45996	-1.83742	0.0661482	NA			ort002675	651.108	-2.49991	1.38879	-1.80007	0.0718492	0.999867			ort000588	99.3725	3.4556	1.82846	1.88989	0.0587721	NA			ort002643	156.052	-3.20528	1.70004	-1.88542	0.0593737	NA			ort001341	545.127	12.9917	6.76663	1.91997
ort009837	695.57	-3.18466	1.60792	-1.98061	0.0476345	0.720715			ort008703	94.0394	3.25265	1.77125	1.83635	0.0663052	NA			ort003386	30.98	4.16503	2.31438	1.79963	0.0719187	0.999867			ort007888	497.12	-2.84555	1.50639	-1.88899	0.0588938	NA			ort001456	806.674	2.65509	1.40854	1.885	0.0594299	0.999494			ort001383	299.088	3.04272	1.58554	1.91905
ort008704	31.9707	5.40652	2.73066	1.97993	0.0477111	NA			ort010146	70.7565	3.48419	1.89919	1.83456	0.0665709	NA			ort004888	30.98	4.16503	2.31438	1.79963	0.0719187	0.999867			ort000372	40.5684	4.44665	2.3549	1.88825	0.058992	NA			ort007066	66.8192	3.92499	2.0839	1.88348	0.0596353	NA			ort010525	202.493	3.21894	1.67906	1.9171
ort003906	16.9752	6.96945	3.52117	1.9793	0.0477828	NA			ort009992	23839.9	2.39176	1.3063	1.83095	0.0671086	0.963386			ort008951	222.424	2.68947	1.49598	1.7978	0.0722083	0.999867			ort006704	74.0616	3.68687	1.95287	1.88793	0.0590358	NA			ort001486	20199	-2.50305	1.3302	-1.88171	0.0598751	0.999494			ort002216	284.457	-3.07115	1.60213	-1.91692
ort000606	63652.9	-3.09535	1.56397	-1.97915	0.0477987	0.720715			ort003815	445.015	-2.59294	1.41679	-1.83014	0.0672285	NA			ort009168	957.44	-2.45902	1.36806	-1.79745	0.0722635	0.999867			ort009976	54.959	-3.93484	2.08573	-1.88655	0.0592206	NA			ort007050	209.915	3.02764	1.60908	1.8816	0.0598898	NA			ort008406	38.2119	5.08844	2.65504	1.91652
ort002853	110.97	3.66673	1.85471	1.97698	0.048044	NA			ort003436	298.828	-2.68083	1.46719	-1.82719	0.067671	NA			ort002364	11.0041	7.19257	4.00317	1.79672	0.0723807	0.999867			ort008983	647.899	2.80236	1.48622	1.88556	0.0593539	NA			ort007931	737.077	2.65667	1.41322	1.87987	0.0601257	0.999494			ort000333	338.569	-2.99182	1.56399	-1.91294
ort003913	30.4733	-4.85392	2.45648	-1.97597	0.0481585	NA			ort001170	468.331	2.57206	1.40846	1.82615	0.0678274	NA			ort003246	11.0041	7.19257	4.00317	1.79672	0.0723807	0.999867			ort008535	2761.62	2.70312	1.43368	1.88544	0.0593698	0.628042			ort010953	18.3437	-7.51504	3.99896	-1.87925	0.060211	NA			ort002379	312.947	-3.01878	1.57901	-1.91182
ort002397	47.2951	-4.24035	2.1468	-1.9752	0.0482455	NA			ort008960	14.7339	-7.1603	3.92333	-1.82506	0.0679921	NA			ort006983	11.0041	7.19257	4.00317	1.79672	0.0723807	0.999867			ort010195	27.1554	5.48531	2.90972	1.88517	0.0594075	NA			ort000873	189.719	3.07077	1.63433	1.87892	0.0602556	NA			ort005309	1299.17	-2.70035	1.4134	-1.91053
ort005948	331.049	3.27858	1.66138	1.97341	0.0484487	0.720715			ort002696	13.4384	7.35416	4.03062	1.82457	0.0680654	NA			ort009218	11.0041	7.19257	4.00317	1.79672	0.0723807	0.999867			ort003906	16.0218	7.19857	3.82439	1.88228	0.059798	NA			ort009260	253.951	2.93594	1.5628	1.87864	0.0602942	NA			ort011257	2351.31	-2.6502	1.38778	-1.90966
ort009854	103.104	3.70061	1.87529	1.97336	0.0484546	NA			ort005165	13.4384	7.35416	4.03062	1.82457	0.0680654	NA			ort002016	18.1378	5.43802	3.0268	1.79662	0.0723953	0.999867			ort008706	2534.99	2.69472	1.43287	1.88064	0.0600205	NA			ort004340	250.221	2.93749	1.56508	1.87689	0.0605328	NA			ort008373	516.943	12.9152	6.76664	1.90865
ort007751	672.684	3.1761	1.61073	1.97184	0.0486284	0.720715			ort000061	2622.1	-2.4067	1.32046	-1.82263	0.0683594	0.963386			ort000781	51.1625	3.52494	1.96347	1.79526	0.0726117	0.999867			ort001946	78.4491	3.6124	1.92091	1.88056	0.0600311	NA			ort004710	105.027	-3.46479	1.84691	-1.87599	0.060657	NA			ort003519	81.3955	3.9056	2.04738	1.90761
ort002007	1553.8	-3.11698	1.58116	-1.97132	0.0486869	0.720715			ort001853	308.944	2.65161	1.45697	1.81995	0.068767	NA			ort007103	736.526	-2.47187	1.37852	-1.79314	0.0729504	0.999867			ort000335	1148.02	-2.73299	1.45343	-1.88038	0.060056	NA			ort005255	787.287	-2.6371	1.40614	-1.87541	0.0607362	0.999494			ort008432	167.14	-3.32936	1.74605	-1.90679
ort011538	322.843	3.27699	1.66303	1.97049	0.0487818	0.720715			ort009165	508.898	-2.54435	1.39838	-1.8195	0.0688349	NA			ort008724	68.8996	3.25251	1.81582	1.7912	0.0732604	0.999867			ort007280	2815.3	2.68752	1.43017	1.87916	0.0602232	0.628042			ort003125	28.9778	-5.70469	3.0422	-1.87518	0.0607677	NA			ort003371	26.4858	6.1664	3.23393	1.90678
ort007615	639.905	-13.3221	6.76664	-1.96879	0.0489774	0.720715			ort007559	4825.33	-2.38215	1.30976	-1.81876	0.0689474	0.963386			ort009820	559.551	-2.49377	1.39379	-1.7892	0.0735825	0.999867			ort009496	118.285	-3.29131	1.75163	-1.879	0.0602451	NA			ort007732	182.26	3.08112	1.64333	1.87493	0.060803	NA			ort007718	26.4858	6.1664	3.23393	1.90678
ort000284	145.886	3.5087	1.78289	1.96798	0.04907	NA			ort003835	349.797	2.61407	1.43837	1.81738	0.0691587	NA			ort000149	248.519	-2.64596	1.47902	-1.789	0.0736154	0.999867			ort008351	1306.13	2.72156	1.44854	1.87883	0.0602683	NA			ort003519	100.385	3.48038	1.85856	1.87263	0.0611197	NA			ort001664	59.2782	4.27608	2.24743	1.90265
ort007282	1172.89	3.12303	1.58829	1.96628	0.049266	0.720715			ort010881	269.906	-2.68163	1.47787	-1.81453	0.0695961	NA			ort004291	752.463	-2.45367	1.37414	-1.7856	0.0741636	0.999867			ort011552	33.6511	4.77483	2.54141	1.87881	0.06027	NA			ort011600	70.0036	3.83439	2.04761	1.87262	0.0611216	NA			ort004529	93.1055	-3.81237	2.00452	-1.90189
ort000274	624.658	-3.16114	1.60867	-1.96506	0.0494069	0.720715			ort001595	5393.53	2.36654	1.30579	1.81234	0.0699332	0.963386			ort000855	44.2312	3.64617	2.04232	1.78531	0.0742116	0.999867			ort008445	22.3605	-5.70131	3.03597	-1.87792	0.0603921	NA			ort009896	11842.1	-2.48403	1.32744	-1.87128	0.0613056	0.999494			ort005002	751.545	-2.75567	1.44902	-1.90175
ort004955	1686.78	3.10172	1.57913	1.9642	0.0495071	0.720715			ort000412	335.015	-2.61417	1.44315	-1.81143	0.0700742	NA			ort005241	162.278	-2.76706	1.5531	-1.78164	0.0748086	0.999867			ort006488	369.123	2.86797	1.53065	1.8737	0.060972	NA			ort002803	16.8996	7.64617	4.08822	1.87029	0.061443	NA			ort002631	118.756	3.53098	1.8572	1.90124
ort009524	31.2917	5.37481	2.73656	1.96408	0.0495213	NA			ort000459	363.674	2.5902	1.43037	1.81086	0.070162	NA			ort008956	213.048	2.66396	1.49552	1.7813	0.074864	0.999867			ort010510	801.442	-2.74321	1.46552	-1.87184	0.0612288	NA			ort000768	1215.25	-2.56109	1.37296	-1.86538	0.0621278	0.999494			ort011290	774.62	-2.74804	1.44576	-1.90076
ort006381	3450.69	-3.07825	1.56808	-1.96307	0.0496378	0.720715			ort005956	237.185	-2.7146	1.49924	-1.81065	0.0701946	NA			ort004349	4061.59	-2.36661	1.32861	-1.78126	0.0748695	0.999867			ort010984	27.5256	-4.98373	2.66345	-1.87115	0.0613241	NA			ort007001	52.3599	4.17225	2.23858	1.86379	0.0623507	NA			ort003974	44.6524	-4.97622	2.62037	-1.89905
ort009784	65.1927	-3.90705	1.99048	-1.96287	0.0496617	NA			ort006761	647.161	-2.48657	1.37359	-1.81027	0.0702543	0.963386			ort000375	479.441	-2.49726	1.40198	-1.78124	0.0748739	0.999867			ort005526	13.6377	-7.45804	3.9899	-1.86923	0.0615911	NA			ort005752	1194.64	-2.55855	1.37295	-1.86355	0.062385	0.999494			ort006907	52.6133	-4.61539	2.43082	-1.8987
ort010458	265.577	-3.2803	1.67211	-1.96177	0.0497892	0.720715			ort008915	80.0557	-3.32162	1.83579	-1.80937	0.0703942	NA			ort011489	173.901	2.7211	1.53073	1.77765	0.0754607	0.999867			ort011440	13.6377	-7.45804	3.9899	-1.86923	0.0615911	NA			ort008448	17.8851	-7.47851	4.01609	-1.86214	0.0625836	NA			ort000872	640.703	2.77188	1.46046	1.89795
ort007352	655.991	3.15353	1.60878	1.96019	0.0499734	0.720715			ort002748	392.754	-2.57163	1.42145	-1.80916	0.0704269	NA			ort001921	149.812	-2.78763	1.56887	-1.77684	0.0755947	0.999867			ort009350	706.466	2.75205	1.47258	1.86887	0.0616411	NA			ort006779	1039.12	-2.56836	1.37982	-1.86137	0.062692	0.999494			ort009263	538.166	2.80713	1.47979	1.89697
ort008606	168.5	-3.39808	1.73403	-1.95964	0.0500383	NA			ort007068	715.235	2.4695	1.36509	1.80904	0.070444	0.963386			ort006327	467.826	-12.0217	6.7666	-1.77663	0.0756297	0.999867			ort002111	392.075	2.84065	1.52095	1.86768	0.0618073	NA			ort008182	2370.03	-2.50281	1.34487	-1.861	0.0627436	0.999494			ort007577	482.438	-2.84005	1.49742	-1.89662
ort007365	936.22	-3.11698	1.59094	-1.95921	0.0500878	0.720715			ort006238	54.8185	-3.69886	2.04474	-1.80896	0.0704567	NA			ort004282	326.172	-2.54601	1.43596	-1.77303	0.0762234	0.999867			ort004533	174.495	-3.07139	1.64463	-1.86753	0.0618279	NA			ort010736	260.369	-2.88344	1.5497	-1.86065	0.0627939	NA			ort006622	1008.65	-2.69735	1.4224	-1.89633
ort006712	109.37	-3.57116	1.82329	-1.95864	0.0501552	NA			ort000333	155.101	-2.88633	1.59559	-1.80893	0.0704612	NA			ort009395	187.005	-2.6917	1.51934	-1.77162	0.0764578	0.999867			ort006779	700.023	-2.74124	1.46996	-1.86485	0.0622031	NA			ort011061	1273.67	2.542	1.36718	1.8593	0.0629842	0.999494			ort010479	419.314	-2.87888	1.51813	-1.89633
ort006558	405.749	3.20225	1.63803	1.95494	0.0505899	0.720715			ort004716	340.6	-2.60242	1.43934	-1.80807	0.0705961	NA			ort009036	392.382	-2.50736	1.41552	-1.77133	0.0765051	0.999867			ort003770	15.6002	7.1601	3.84026	1.86448	0.0622542	NA			ort010059	603.451	-2.64037	1.42125	-1.85777	0.0632011	NA			ort009830	175.425	-3.26796	1.72352	-1.8961
ort004682	71.3004	3.92008	2.00543	1.95473	0.050615	NA			ort011240	363.718	-2.58126	1.42951	-1.8057	0.0709657	NA			ort003436	86.0505	-3.06759	1.73218	-1.77094	0.0765707	0.999867			ort004887	15.6002	7.1601	3.84026	1.86448	0.0622542	NA			ort009782	108.847	3.36491	1.81294	1.85605	0.0634465	NA			ort010089	35.964	-5.6813	2.99632	-1.89609
ort002611	199.307	3.36143	1.71999	1.95432	0.0506629	NA			ort001486	289.913	2.6357	1.45999	1.80528	0.0710304	NA			ort009182	17955.2	-2.33114	1.31644	-1.77079	0.0765949	0.999867			ort006384	41.2423	-4.21436	2.2608	-1.8641	0.0623081	NA			ort004296	392.624	2.7321	1.47222	1.85577	0.0634869	NA			ort002956	33052.9	-2.56177	1.35152	-1.89547
ort001189	202.426	-3.32788	1.70376	-1.95325	0.0507896	NA			ort002058	14.2874	-7.11591	3.94499	-1.80378	0.0712656	NA			ort003663	2343.15	-2.35689	1.33139	-1.77025	0.0766853	0.999867			ort003835	671.958	2.74616	1.47336	1.86387	0.0623399	NA			ort008643	1950.09	-2.50115	1.34802	-1.85542	0.063536	0.999494			ort004612	42.0127	4.80116	2.53306	1.8954
ort005857	129.135	3.52685	1.80599	1.95287	0.0508355	NA			ort005216	14.2874	-7.11591	3.94499	-1.80378	0.0712656	NA			ort008884	322.539	2.53589	1.43294	1.76971	0.0767746	0.999867			ort000363	91.1903	3.43699	1.84536	1.8625	0.0625328	NA			ort008960	28.0607	-5.65738	3.05304	-1.85303	0.0638776	NA			ort011654	54.79	4.3591	2.30059	1.89478
ort011388	2460.83	3.06366	1.56966	1.9518	0.0509614	0.720715			ort007966	14.2874	-7.11591	3.94499	-1.80378	0.0712656	NA			ort004014	428.768	2.48395	1.40412	1.76905	0.0768859	0.999867			ort001322	1663.7	-2.6663	1.43242	-1.86139	0.0626885	NA			ort003704	176.377	-3.04333	1.64312	-1.85216	0.0640025	NA			ort001309	22.1843	-7.45474	3.93675	-1.89363
ort001192	685.485	-3.12218	1.60052	-1.95072	0.0510903	0.720715			ort000392	35.3819	4.23352	2.34986	1.8016	0.0716077	NA			ort000716	27.3947	-4.41987	2.50115	-1.76713	0.0772057	0.999867			ort009221	901.24	-2.7063	1.45433	-1.86086	0.0627646	NA			ort004435	1157.61	-2.52672	1.36704	-1.84831	0.064557	0.999494			ort010536	670.542	2.7473	1.45255	1.89136
ort003107	16.2962	6.91055	3.54428	1.94978	0.0512029	NA			ort009436	2328.42	-2.36242	1.31283	-1.79948	0.0719428	0.963386			ort006498	13142.8	2.3237	1.31543	1.7665	0.0773122	0.999867			ort009932	219.361	-2.96682	1.59536	-1.85965	0.0629352	NA			ort011648	16.3544	7.59887	4.11196	1.84799	0.0646039	NA			ort008266	168.61	3.25353	1.72057	1.89096
ort003770	16.2962	6.91055	3.54428	1.94978	0.0512029	NA			ort001220	58.5038	-3.59219	1.99716	-1.79865	0.0720739	NA			ort001350	295.888	11.941	6.76676	1.76466	0.0776207	0.999867			ort001225	137.839	-3.15487	1.69714	-1.85894	0.0630362	NA			ort004946	4233.76	2.45024	1.32607	1.84775	0.0646387	0.999494			ort005565	840.17	-2.71026	1.43363	-1.89048
ort009120	114.422	3.5788	1.83595	1.94929	0.0512604	NA			ort009231	26607.3	-2.32383	1.29223	-1.79831	0.0721273	0.963386			ort005376	228.546	2.60274	1.47611	1.76324	0.0778597	0.999867			ort003611	85.9594	3.47	1.86707	1.85853	0.0630936	NA			ort008603	388.263	2.71354	1.46928	1.84686	0.0647678	NA			ort006610	153.037	-3.3407	1.768	-1.88954
ort010583	952.53	-3.09473	1.58771	-1.94918	0.051274	0.720715			ort007240	346.77	2.56915	1.43012	1.79645	0.0724228	NA			ort003810	546.259	-2.44051	1.38422	-1.76309	0.0778852	0.999867			ort003863	907.715	2.70138	1.45371	1.85827	0.0631309	NA			ort002201	66.2711	-3.82735	2.07449	-1.84496	0.0650432	NA			ort008084	465.386	12.7636	6.76666	1.88625
ort009638	276.847	-3.24097	1.66378	-1.94796	0.0514195	0.720715			ort001049	12.8785	7.29276	4.06303	1.79491	0.0726682	NA			ort000951	756.02	2.40279	1.36303	1.76283	0.07793	0.999867			ort000206	839.622	2.70754	1.45741	1.85777	0.0632016	NA			ort004579	79.8299	-3.62202	1.96337	-1.8448	0.0650661	NA			ort003463	462.636	12.755	6.76667	1.88498
ort006683	2519.06	-3.05275	1.56735	-1.94772	0.0514489	0.720715			ort001744	12.8785	7.29276	4.06303	1.79491	0.0726682	NA			ort006571	192.317	-2.65897	1.5094	-1.7616	0.0781364	0.999867			ort002314	839.622	2.70754	1.45741	1.85777	0.0632016	NA			ort004122	17.4265	-7.44104	4.034	-1.84458	0.0650986	NA			ort008028	119.12	3.47654	1.84585	1.88343
ort005988	47.3631	4.3533	2.23612	1.94681	0.0515571	NA			ort011172	12.8785	7.29276	4.06303	1.79491	0.0726682	NA			ort004825	37.6141	-3.84614	2.18394	-1.7611	0.0782211	0.999867			ort001064	788.819	-2.71014	1.45936	-1.85708	0.0633001	NA			ort005526	17.4265	-7.44104	4.034	-1.84458	0.0650986	NA			ort004953	1548.66	2.61657	1.38989	1.88257
ort004690	576.992	3.13661	1.61175	1.94609	0.0516438	0.720715			ort004489	64.1507	3.45593	1.92673	1.79368	0.0728647	NA			ort000161	2790.25	-2.32806	1.32378	-1.75865	0.0786375	0.999867			ort001286	358.53	-2.82751	1.52298	-1.85656	0.0633732	NA			ort003085	605.173	-2.60186	1.41274	-1.84172	0.0655164	NA			ort008448	21.8206	-7.43089	3.94753	-1.88242
ort002168	316.606	-3.2091	1.64972	-1.94524	0.0517458	0.720715			ort005852	463.002	-12.1335	6.76661	-1.79314	0.0729506	NA			ort007808	1750.01	2.34201	1.33185	1.75847	0.078668	0.999867			ort005309	1112.27	-2.67569	1.44243	-1.85499	0.0635976	NA			ort005328	202.742	2.93895	1.59603	1.84142	0.0655606	NA			ort004581	202.461	-3.14033	1.66996	-1.88048
ort009183	629.734	3.12401	1.60658	1.94451	0.0518337	0.720715			ort007066	42.994	3.9116	2.1816	1.793	0.072973	NA			ort001478	236.048	-2.58982	1.47294	-1.75827	0.0787016	0.999867			ort004375	159.171	-3.07687	1.65887	-1.8548	0.063625	NA			ort003207	162.818	-3.05888	1.66128	-1.84128	0.0655802	NA			ort004453	2380.1	-2.58026	1.37293	-1.87938
ort006519	133.441	-3.44763	1.7733	-1.94419	0.0518728	NA			ort003444	367.316	12.1263	6.76667	1.79206	0.0731235	NA			ort003352	640.006	2.40889	1.37022	1.75803	0.0787423	0.999867			ort005396	1807.79	2.64597	1.42725	1.85389	0.0637549	NA			ort004583	246.897	-2.85488	1.55072	-1.841	0.0656211	NA			ort001056	58.3922	-4.3388	2.31161	-1.87696
ort009352	1175.74	-3.07219	1.58028	-1.94408	0.0518863	0.720715			ort000407	162.585	-2.82082	1.57453	-1.79153	0.0732084	NA			ort001153	10.3928	7.1101	4.04657	1.75707	0.0789059	0.999867			ort005461	4367.76	2.61774	1.4124	1.8534	0.0638252	0.648054			ort002049	106.667	3.33285	1.81171	1.83961	0.0658256	NA			ort008270	123.778	-3.45994	1.84515	-1.87515
ort009200	55900.3	-3.02173	1.55461	-1.94372	0.0519295	0.720715			ort005414	23.3305	-5.34571	2.98397	-1.79147	0.0732174	NA			ort001883	10.3928	7.1101	4.04657	1.75707	0.0789059	0.999867			ort001484	447.77	2.77954	1.50018	1.8528	0.0639109	NA			ort002658	253.49	-2.8395	1.54393	-1.83913	0.0658959	NA			ort010934	34.873	-5.63597	3.00602	-1.8749
ort004067	51421.5	-3.01995	1.55442	-1.94281	0.0520396	0.720715			ort006031	39.7442	-4.06563	2.27166	-1.78972	0.0734996	NA			ort002349	10.3928	7.1101	4.04657	1.75707	0.0789059	0.999867			ort002861	619.765	-2.726	1.47179	-1.85216	0.0640025	NA			ort002168	1071.87	-2.51362	1.36677	-1.83909	0.0659013	0.999494			ort008329	312.464	-2.92147	1.55935	-1.87352
ort002857	148.32	3.43939	1.77085	1.94223	0.0521097	NA			ort000215	272.032	-2.61929	1.46456	-1.78845	0.0737028	NA			ort003906	10.3928	7.1101	4.04657	1.75707	0.0789059	0.999867			ort005182	3427.62	2.61539	1.41368	1.85005	0.0643059	0.648054			ort001133	627.332	-2.58898	1.40781	-1.83901	0.0659131	NA			ort010154	1057.79	-2.6379	1.40804	-1.87346
ort011270	202.765	-3.30141	1.70024	-1.94173	0.0521694	NA			ort006159	93.4575	-3.14045	1.75607	-1.78835	0.0737199	NA			ort006907	26.9858	-4.39715	2.50461	-1.75562	0.0791534	0.999867			ort001802	357.173	-2.80565	1.51885	-1.84722	0.0647158	NA			ort003446	40.1571	-4.55787	2.47959	-1.83815	0.0660397	NA			ort004571	30.974	5.37793	2.87078	1.87333
ort003523	432.599	-3.15015	1.62336	-1.94051	0.0523175	0.720715			ort006114	1605.18	-2.354	1.31738	-1.78688	0.0739574	0.963386			ort004929	179.205	2.65619	1.51414	1.75426	0.0793863	0.999867			ort002188	19515.6	-2.58733	1.40113	-1.8466	0.0648054	0.648054			ort002188	18975.6	-2.40229	1.30836	-1.8361	0.0663421	0.999494			ort009221	602.384	-2.7268	1.45693	-1.8716
ort007665	1629.35	3.05259	1.57342	1.9401	0.0523673	0.720715			ort000315	226.784	2.66934	1.49417	1.7865	0.074018	NA			ort003469	2796.99	-2.31631	1.32138	-1.75295	0.0796102	0.999867			ort004016	15.1785	7.12057	3.85694	1.84617	0.0648679	NA			ort006183	844.283	-2.53421	1.38073	-1.83541	0.0664451	0.999494			ort002575	439.036	-2.8039	1.49835	-1.87132
ort009178	557.432	-13.123	6.76667	-1.93936	0.052457	0.720715			ort008884	406.76	2.51065	1.40572	1.78603	0.0740945	NA			ort008812	76.2401	-3.10316	1.77026	-1.75294	0.0796121	0.999867			ort008280	766.801	-2.68327	1.45487	-1.84433	0.0651352	NA			ort006796	95.7682	-3.42108	1.86397	-1.83538	0.0664499	NA			ort011428	120.171	3.43311	1.83491	1.871
ort008985	678.403	3.10378	1.60119	1.93842	0.0525724	0.720715			ort009471	230.487	-2.66688	1.49323	-1.78598	0.0741026	NA			ort000043	3076.98	2.31099	1.31927	1.75171	0.0798232	0.999867			ort002315	59.3599	-3.70913	2.01305	-1.84255	0.0653955	NA			ort008169	1667.83	2.46405	1.34308	1.83463	0.0665598	0.999494			ort006111	265.972	2.96557	1.58562	1.8703
ort004251	112.724	3.55542	1.83569	1.93683	0.0527662	NA			ort006302	46.2402	3.78607	2.12236	1.7839	0.07444	NA			ort002032	2308.29	2.31782	1.32343	1.75137	0.0798814	0.999867			ort000565	304.349	-2.82996	1.53615	-1.84224	0.0654403	NA			ort005234	2732	2.43635	1.32801	1.83458	0.066568	0.999494			ort003400	1658.77	-2.58357	1.38171	-1.86984
ort006571	331.162	-3.17885	1.64282	-1.935	0.0529904	0.720715			ort007280	2696.73	2.32307	1.30276	1.78318	0.0745566	0.963386			ort009898	646.795	-2.39514	1.36791	-1.75095	0.0799549	0.999867			ort007615	436.998	-12.4594	6.76667	-1.84128	0.06558	NA			ort007272	2041.78	-2.45118	1.33616	-1.8345	0.0665801	0.999494			ort004159	40.6379	4.75141	2.54194	1.86921
ort010628	5850.68	-3.00829	1.55648	-1.93275	0.053267	0.720715			ort000730	1344.18	-2.35726	1.32194	-1.78318	0.0745573	0.963386			ort004946	1313.48	2.33921	1.33611	1.75076	0.0799875	0.999867			ort005499	48.015	-3.93247	2.13644	-1.84067	0.0656706	NA			ort003325	1385.2	2.47675	1.35052	1.83392	0.0666657	0.999494			ort004455	381.002	2.83213	1.51532	1.869
ort009669	274.686	3.2268	1.66957	1.93272	0.0532712	0.720715			ort008615	53.2924	3.61615	2.02795	1.78316	0.0745605	NA			ort007455	168.399	2.66755	1.52441	1.74989	0.0801365	0.999867			ort001554	4659.18	2.58727	1.40575	1.84049	0.0656968	0.64809			ort009178	543.431	-12.4032	6.7666	-1.833	0.0668029	NA			ort002254	1468.02	-2.5909	1.38669	-1.86841
ort003916	38724.9	-2.99674	1.55164	-1.93134	0.0534412	0.720715			ort009018	2508.25	2.32434	1.30392	1.78257	0.0746559	0.963386			ort003383	21.0583	-5.06371	2.89412	-1.74966	0.0801778	0.999867			ort003895	13.0447	-7.3939	4.02016	-1.83921	0.0658849	NA			ort010962	427.219	2.65032	1.44748	1.83098	0.0671031	NA			ort001685	343.461	-2.87325	1.53808	-1.86808
ort001410	260.312	3.23224	1.67508	1.92961	0.0536556	0.720715			ort001704	1134.78	-2.36735	1.3284	-1.7821	0.0747323	0.963386			ort008835	1901.32	2.31947	1.32614	1.74905	0.0802829	0.999867			ort010262	13.0447	-7.3939	4.02016	-1.83921	0.0658849	NA			ort004134	1204.58	2.4811	1.35558	1.83028	0.0672081	0.999494			ort008818	2513.41	2.54999	1.3652	1.86784
ort006974	255.267	-3.21718	1.66749	-1.92935	0.0536871	0.720715			ort006458	333.123	-2.54554	1.42988	-1.78025	0.0750344	NA			ort002890	1431.71	-2.33223	1.33348	-1.74898	0.0802951	0.999867			ort002464	111.02	3.23296	1.75932	1.83762	0.066118	NA			ort000761	27.1435	-5.60847	3.06458	-1.8301	0.0672354	NA			ort009673	77.271	3.82543	2.05054	1.86557
ort005220	46.3446	4.32039	2.23955	1.92913	0.053715	NA			ort001721	285.994	-2.58417	1.45226	-1.77941	0.0751721	NA			ort002577	185.323	2.63072	1.50496	1.74803	0.0804592	0.999867			ort003760	179.739	-2.97841	1.62212	-1.83612	0.0663393	NA			ort006563	872.272	2.51629	1.37514	1.82984	0.0672732	0.999494			ort009094	408.052	2.79859	1.50164	1.86368
ort003669	53329.5	-2.98926	1.55052	-1.9279	0.0538675	0.720715			ort003205	65.4279	-3.41749	1.92063	-1.77936	0.0751813	NA			ort010510	712.391	-2.37805	1.36085	-1.74747	0.0805558	0.999867			ort001711	96.0166	-3.29926	1.79705	-1.83593	0.0663682	NA			ort007888	684.466	-2.55113	1.39471	-1.82914	0.067378	NA			ort001225	116.545	-3.47375	1.86473	-1.86287
ort003170	172.654	3.34554	1.73596	1.92721	0.0539539	NA			ort011663	431.302	-12.0312	6.76662	-1.77802	0.0754012	NA			ort001075	3357.51	-2.29811	1.31613	-1.74611	0.0807915	0.999867			ort001478	242.551	-2.87524	1.56627	-1.83573	0.0663979	NA			ort007132	3088.47	2.41725	1.32219	1.82822	0.0675168	0.999494			ort001744	16.4982	7.94603	4.26784	1.86184
ort000473	165.158	-3.32998	1.72797	-1.92711	0.0539664	NA			ort008775	425.944	-12.0131	6.76663	-1.77535	0.07584	NA			ort011569	9189.64	2.28178	1.30779	1.74477	0.0810256	0.999867			ort011171	58.7669	-3.69353	2.01321	-1.83465	0.0665581	NA			ort008266	370.533	2.68092	1.46663	1.82794	0.067558	NA			ort011192	16.4982	7.94603	4.26784	1.86184
ort005282	1566.13	-3.02406	1.56931	-1.927	0.05398	0.720715			ort004946	1802.11	2.31861	1.30777	1.77294	0.0762381	0.963386			ort000056	695.224	-2.37308	1.36073	-1.74397	0.0811638	0.999867			ort010198	292.411	-2.82053	1.53765	-1.83431	0.0666075	NA			ort006596	50.4193	-4.12904	2.25906	-1.82777	0.0675846	NA			ort004253	50.0676	-4.54084	2.44054	-1.86059
ort003175	272.649	3.21491	1.66867	1.92663	0.0540255	0.720715			ort009460	522.428	-2.43042	1.37366	-1.7693	0.0768432	NA			ort010247	265.321	11.7837	6.76679	1.74141	0.0816126	0.999867			ort007788	745.376	-2.65653	1.45043	-1.83154	0.0670193	NA			ort008562	433.501	2.63597	1.4432	1.82647	0.0677791	NA			ort006458	497.393	-2.7436	1.47495	-1.86013
ort004557	139.614	-3.38168	1.75782	-1.92379	0.0543809	NA			ort000105	146.53	2.8083	1.58765	1.76884	0.0769203	NA			ort004604	62.9558	-3.2169	1.84886	-1.73994	0.0818699	0.999867			ort001721	246.952	-2.85786	1.56095	-1.83085	0.067123	NA			ort002842	525.546	-12.3549	6.7666	-1.82586	0.0678711	NA			ort008580	406.955	12.57	6.7667	1.85763
ort003436	406.601	-3.11407	1.62213	-1.91975	0.0548899	0.724487			ort008373	328.68	11.9659	6.7667	1.76836	0.077001	NA			ort010220	850.323	-2.34308	1.34798	-1.73821	0.0821739	0.999867			ort000248	165.95	3.00509	1.64248	1.8296	0.0673095	NA			ort006664	513.395	2.59477	1.42151	1.82536	0.0679462	NA			ort001971	572.723	-2.70171	1.4553	-1.85646
ort004559	445.624	-3.1011	1.61565	-1.91941	0.054932	0.724487			ort004318	245.92	2.59967	1.47054	1.76783	0.0770889	NA			ort007934	67.4745	3.12198	1.79639	1.73792	0.082225	0.999867			ort007292	343.285	-2.77161	1.51489	-1.82958	0.0673122	NA			ort004544	3615.05	-2.40368	1.31744	-1.82451	0.0680754	0.999494			ort004711	42.1066	-4.88876	2.63499	-1.85532
ort008495	144.246	3.39544	1.76919	1.91921	0.0549583	NA			ort001745	263.604	2.5719	1.45718	1.76499	0.0775659	NA			ort007289	176.17	-2.63324	1.51535	-1.73772	0.0822607	0.999867			ort002329	54.7877	-3.74824	2.04875	-1.82952	0.0673212	NA			ort002584	678.963	-2.53749	1.3922	-1.82265	0.0683566	NA			ort009547	304.827	-2.88099	1.55417	-1.85372
ort000087	82.6187	3.70317	1.92961	1.91913	0.054968	NA			ort003391	3327.59	-2.27946	1.29163	-1.76479	0.0775986	0.963386			ort005869	1075.92	-2.32383	1.33776	-1.73711	0.0823677	0.999867			ort010744	482.704	-2.70751	1.48011	-1.82925	0.0673615	NA			ort002438	53.9088	3.98123	2.18463	1.82238	0.0683972	NA			ort009978	2582.33	-2.51602	1.35793	-1.85283
ort011176	361.009	-3.13016	1.63111	-1.91904	0.0549795	0.724487			ort001906	12.3185	7.22863	4.09803	1.76393	0.077744	NA			ort008113	503.607	2.39267	1.3774	1.73709	0.0823715	0.999867			ort004795	1247.86	-2.60819	1.42601	-1.82901	0.0673976	NA			ort005414	44.8296	-4.28968	2.35488	-1.82162	0.0685134	NA			ort008171	312.748	-2.86232	1.54708	-1.85014
ort000007	170.617	3.32673	1.73507	1.91734	0.0551944	NA			ort002313	12.3185	7.22863	4.09803	1.76393	0.077744	NA			ort003705	50.0805	-3.41989	1.96951	-1.73641	0.0824905	0.999867			ort011177	2951.35	-2.56984	1.40549	-1.82842	0.067486	0.654663			ort004582	35.72	4.64173	2.54937	1.82074	0.0686471	NA			ort001649	680.889	2.64541	1.43051	1.84928
ort010992	354.536	3.14173	1.63884	1.91705	0.0552319	0.724487			ort008704	24.9701	4.75288	2.6958	1.76307	0.0778885	NA			ort010389	1646.06	-2.29796	1.32419	-1.73538	0.0826735	0.999867			ort000022	843.145	-2.63673	1.44222	-1.82824	0.0675129	NA			ort001760	26.6849	-5.58338	3.07042	-1.81844	0.0689968	NA			ort007280	3345.18	2.49481	1.34923	1.84906
ort002097	75141.1	-2.96136	1.54686	-1.91443	0.0555656	0.724487			ort011449	33.7021	4.15952	2.36096	1.7618	0.0781039	NA			ort005540	11.8592	-6.72046	3.87542	-1.73413	0.0828958	0.999867			ort005620	14.7569	7.07992	3.8745	1.82731	0.0676526	NA			ort003651	502.158	-12.2892	6.76661	-1.81615	0.0693466	NA			ort007635	97.0023	3.54859	1.9192	1.84899
ort006903	196.138	-3.24851	1.69701	-1.91426	0.0555875	NA			ort008233	115.683	-2.92757	1.6619	-1.76159	0.0781391	NA			ort007587	11.8592	-6.72046	3.87542	-1.73413	0.0828958	0.999867			ort006100	1974.82	2.5807	1.41258	1.82694	0.0677081	NA			ort007105	353.435	2.66447	1.46767	1.81545	0.0694553	NA			ort006375	440.371	-2.74806	1.48652	-1.84866
ort002973	2008.24	-2.98828	1.56154	-1.91368	0.0556613	0.724487			ort010369	170.629	-2.72644	1.5478	-1.76149	0.078155	NA			ort001500	617.792	2.36209	1.36221	1.73402	0.0829151	0.999867			ort011073	135.295	-3.07687	1.68491	-1.82613	0.0678306	NA			ort000116	307.328	-2.70412	1.49165	-1.81285	0.0698555	NA			ort008960	20.7296	-7.35689	3.98165	-1.8477
ort008245	1233.5	3.00983	1.57286	1.9136	0.0556716	0.724487			ort004546	156.155	2.75961	1.56683	1.76126	0.0781937	NA			ort005290	4207.16	-2.26674	1.30818	-1.73274	0.0831421	0.999867			ort001464	305.852	2.79405	1.53036	1.82574	0.0678895	NA			ort008022	572.374	2.54109	1.40265	1.81163	0.0700431	NA			ort011271	534.452	-2.69502	1.4591	-1.84704
ort000032	11.0455	-7.46645	3.90215	-1.91342	0.0556942	NA			ort006074	262.484	2.56472	1.4562	1.76124	0.0781979	NA			ort009021	47.4944	3.4079	1.9674	1.73218	0.0832414	0.999867			ort000027	78.492	-3.41077	1.86904	-1.82488	0.0680193	NA			ort002216	248.074	-2.77521	1.5332	-1.81007	0.0702842	NA			ort002882	1815.1	-2.51998	1.36602	-1.84476
ort004475	11.0455	-7.46645	3.90215	-1.91342	0.0556942	NA			ort003401	2658.95	-2.27742	1.29368	-1.76042	0.078336	0.963386			ort001078	2759.14	-2.27234	1.31259	-1.73118	0.0834189	0.999867			ort005514	64.9467	-3.56515	1.95482	-1.82377	0.0681868	NA			ort008707	92.2073	3.34629	1.85546	1.80348	0.0713123	NA			ort003896	1766.07	-2.52181	1.36708	-1.84467
ort005812	11.0455	-7.46645	3.90215	-1.91342	0.0556942	NA			ort008770	1039.08	-2.32913	1.32318	-1.76026	0.0783642	0.963386			ort008004	89.7268	-2.93234	1.69525	-1.72974	0.0836759	0.999867			ort009242	296.656	2.79524	1.53323	1.8231	0.0682879	NA			ort008593	3038.72	-2.36334	1.31062	-1.80322	0.0713537	0.999494			ort009635	688.708	-2.63404	1.42886	-1.84345
ort007216	11.0455	-7.46645	3.90215	-1.91342	0.0556942	NA			ort005453	217.378	2.62289	1.49028	1.76	0.0784072	NA			ort010975	6393.27	-2.25055	1.30276	-1.72753	0.084072	0.999867			ort009094	263.663	2.82475	1.55008	1.82233	0.0684052	NA			ort004355	23.8999	5.67564	3.14771	1.8031	0.0713721	NA			ort010744	464.498	-2.72075	1.47604	-1.84328
ort008445	11.0455	-7.46645	3.90215	-1.91342	0.0556942	NA			ort003158	607.311	-2.38774	1.35669	-1.75997	0.0784122	0.963386			ort009178	370.907	-11.6868	6.76664	-1.72713	0.084145	0.999867			ort002842	399.05	-12.3283	6.76669	-1.82191	0.0684684	NA			ort004362	694.504	-2.48565	1.37972	-1.80156	0.0716144	0.999494			ort004044	78.3221	3.73957	2.0288	1.84324
ort010091	11.0455	-7.46645	3.90215	-1.91342	0.0556942	NA			ort000920	13.3945	-7.0228	3.99219	-1.75913	0.0785547	NA			ort007158	32659.8	-2.2391	1.29711	-1.72622	0.0843071	0.999867			ort009800	6647.13	-2.53928	1.394	-1.82158	0.0685189	0.654663			ort002565	799.975	2.4618	1.36715	1.80068	0.0717534	0.999494			ort000865	910.737	-2.5873	1.40401	-1.8428
ort005871	1287.99	-3.00201	1.56971	-1.91246	0.0558168	0.724487			ort003463	313.562	11.898	6.76671	1.75832	0.0786937	NA			ort010948	456.536	-2.38491	1.38206	-1.72562	0.0844154	0.999867			ort003665	25.7468	-4.88419	2.68134	-1.82155	0.0685231	NA			ort002640	489.191	-2.54843	1.41548	-1.8004	0.0717978	NA			ort009159	712.806	-12.46	6.76654	-1.84141
ort010998	1786.45	-2.98521	1.56258	-1.91044	0.0560767	0.7254			ort004204	3795.68	-2.26117	1.28666	-1.7574	0.0788491	0.963386			ort003581	981.303	-2.30598	1.33645	-1.72545	0.0844463	0.999867			ort002813	31.1214	4.6578	2.55734	1.82135	0.0685544	NA			ort009446	251.457	-2.7415	1.52421	-1.79864	0.0720764	NA			ort006680	74.6379	-3.85903	2.09661	-1.8406
ort009471	188.831	-3.24704	1.70109	-1.9088	0.0562874	NA			ort004331	436.747	2.43121	1.38459	1.7559	0.0791054	NA			ort006552	360.067	2.41535	1.40116	1.72382	0.0847409	0.999867			ort004827	211.481	-2.87964	1.58209	-1.82015	0.0687356	NA			ort004066	48.5849	-4.07246	2.26457	-1.79834	0.0721237	NA			ort008187	304.867	2.83567	1.54133	1.83975
ort001432	41770.9	-2.94875	1.54552	-1.90794	0.0563986	0.7254			ort001858	124.927	2.8539	1.6275	1.75355	0.0795084	NA			ort009516	863.496	2.30686	1.33958	1.72208	0.0850558	0.999867			ort011557	1649.37	2.5697	1.4131	1.81849	0.0689892	NA			ort009135	590.589	2.50404	1.39266	1.79802	0.0721734	NA			ort008773	2134.28	-2.49416	1.35692	-1.83811
ort004121	185.546	-3.24943	1.70341	-1.90761	0.0564422	NA			ort010133	659.696	2.35921	1.34633	1.75232	0.0797183	0.963386			ort002526	88.9089	-2.91739	1.69442	-1.72177	0.0851118	0.999867			ort006793	1000.25	-2.59944	1.42958	-1.81832	0.0690151	NA			ort004557	186.068	-2.87278	1.59788	-1.79787	0.0721983	NA			ort007346	128.063	-3.3159	1.8067	-1.83533
ort003612	108.65	3.4977	1.83506	1.90604	0.0566454	NA			ort000559	357.841	2.46362	1.40624	1.75192	0.0797873	NA			ort003814	88.9089	-2.91739	1.69442	-1.72177	0.0851118	0.999867			ort006077	6077.26	-2.53259	1.39301	-1.81807	0.0690535	0.654663			ort001714	2639.47	2.35699	1.31108	1.79774	0.0722181	0.999494			ort009644	474.036	2.68892	1.46552	1.83479
ort008523	291.551	3.15352	1.65487	1.9056	0.0567023	0.7254			ort010736	318.722	-2.49024	1.42274	-1.75031	0.0800647	NA			ort005414	20.2404	-5.00481	2.90717	-1.72154	0.0851524	0.999867			ort005391	506.601	2.65591	1.46808	1.8091	0.0704354	NA			ort003718	206.67	2.81712	1.5674	1.79732	0.0722841	NA			ort000760	15.8108	7.88462	4.30283	1.83243
ort011657	28.9152	5.258	2.75952	1.9054	0.0567276	NA			ort010838	196.335	2.63432	1.5063	1.74887	0.0803132	NA			ort005852	360.684	-11.6465	6.76664	-1.72117	0.0852207	0.999867			ort011512	521.127	-2.64857	1.4641	-1.80901	0.07045	NA			ort010715	318.308	-2.65503	1.47726	-1.79726	0.0722936	NA			ort003651	683.348	-12.3991	6.76655	-1.83241
ort008721	18.7487	-5.76079	3.02695	-1.90317	0.0570187	NA			ort007679	174.845	2.67555	1.53179	1.74668	0.0806922	NA			ort009428	1295.99	-2.2798	1.32476	-1.72092	0.0852657	0.999867			ort002156	274.889	2.77772	1.53666	1.80763	0.0706638	NA			ort008848	470.415	-2.54806	1.41835	-1.7965	0.0724157	NA			ort001484	667.504	2.60564	1.42342	1.83055
ort006588	163.288	-3.27618	1.72252	-1.90197	0.0571749	NA			ort011386	158.728	2.71458	1.55521	1.74547	0.0809029	NA			ort003401	2399.06	-2.25428	1.31034	-1.72037	0.0853656	0.999867			ort011479	667.097	2.61369	1.44664	1.80673	0.0708038	NA			ort005337	908.045	-2.43468	1.35593	-1.79558	0.0725619	0.999494			ort005391	564.887	2.63796	1.44128	1.83029
ort000219	37264.4	-2.93623	1.54399	-1.90171	0.0572093	0.7254			ort008604	200.339	-2.62194	1.50284	-1.74465	0.0810455	NA			ort007436	1336.46	-2.27655	1.32349	-1.7201	0.0854134	0.999867			ort000333	253.211	-2.78701	1.54428	-1.80473	0.0711162	NA			ort002564	901.268	2.43339	1.3557	1.79493	0.0726651	0.999494			ort002861	487.857	-2.67639	1.46267	-1.82979
ort006241	302.87	3.13634	1.64958	1.90129	0.0572637	0.7254			ort001189	232.727	-2.56734	1.47218	-1.74391	0.0811756	NA			ort008986	1360.97	-2.27135	1.32209	-1.718	0.0857963	0.999867			ort000908	207.331	-2.84711	1.57794	-1.80432	0.0711813	NA			ort007987	25.7677	-5.53185	3.08319	-1.7942	0.072782	NA			ort005460	153.81	3.14333	1.71806	1.82958
ort008813	2963.25	-2.95337	1.5534	-1.90123	0.057272	0.7254			ort006163	1491.42	-2.26772	1.30122	-1.74277	0.0813743	0.963386			ort002228	1298.44	-2.2735	1.32344	-1.71787	0.0858207	0.999867			ort003028	396.147	2.68333	1.48832	1.80293	0.0713997	NA			ort010633	4171.86	2.33245	1.30025	1.79385	0.0728373	0.999494			ort005909	153.81	3.14333	1.71806	1.82958
ort004376	895.545	3.00155	1.57936	1.90049	0.0573685	0.7254			ort002884	15436	-2.21335	1.27026	-1.74244	0.0814314	0.963386			ort007694	390.245	2.38879	1.39066	1.71773	0.0858451	0.999867			ort001712	1175.67	2.55111	1.41603	1.80159	0.07161	NA			ort000152	6709.67	2.31379	1.29257	1.79007	0.0734428	0.999494			ort005376	288.612	2.8274	1.54657	1.82817
ort004582	36.7811	4.58341	2.41453	1.89827	0.0576609	NA			ort003866	1689.21	-2.26014	1.29712	-1.74243	0.0814338	0.963386			ort003268	1473.57	-2.26548	1.31944	-1.717	0.0859793	0.999867			ort010197	612.966	-2.60685	1.44798	-1.80033	0.0718082	NA			ort008084	372.336	12.1073	6.76666	1.78925	0.0735745	NA			ort004057	419.722	-2.70882	1.48297	-1.82662
ort004047	44.647	4.2638	2.24619	1.89824	0.0576646	NA			ort011590	158.168	2.7087	1.55463	1.74234	0.081449	NA			ort008045	1810.74	-2.2551	1.31405	-1.71615	0.0861342	0.999867			ort008266	139.375	3.00731	1.67054	1.8002	0.0718297	NA			ort001678	907.301	-2.42017	1.35279	-1.78902	0.073612	0.999494			ort011478	1400.3	-2.50001	1.36896	-1.82621
ort009504	134.003	3.37485	1.77848	1.8976	0.0577484	NA			ort001418	487.892	2.38095	1.36713	1.74157	0.0815836	NA			ort007292	472.472	-2.35999	1.37519	-1.71612	0.0861399	0.999867			ort006712	234.672	-2.79725	1.55408	-1.79995	0.071869	NA			ort009242	436.08	2.54624	1.4234	1.78884	0.0736408	NA			ort001216	136.347	-3.23865	1.77482	-1.82477
ort010418	549.21	3.037	1.601	1.89694	0.0578358	0.7254			ort008953	248.826	2.53515	1.45625	1.74088	0.0817054	NA			ort008593	451.629	-2.36632	1.3789	-1.71609	0.0861464	0.999867			ort011061	837.132	2.57406	1.43021	1.79978	0.0718953	NA			ort010984	42.9953	-4.22626	2.36267	-1.78877	0.0736524	NA			ort006327	32.3273	-5.52433	3.03153	-1.82229
ort004821	364.894	3.09245	1.63043	1.89671	0.057866	0.7254			ort003750	515.178	-2.37154	1.3625	-1.74058	0.0817575	NA			ort006419	35.5694	-3.75973	2.19168	-1.71545	0.0862623	0.999867			ort006140	211.139	-2.82311	1.57096	-1.79706	0.0723262	NA			ort008088	184.38	2.84904	1.59274	1.78877	0.0736526	NA			ort004528	40.2882	-4.82287	2.64676	-1.82218
ort011266	578.946	-3.0213	1.59389	-1.89555	0.0580195	0.7254			ort001435	812.462	2.30648	1.32668	1.73853	0.0821178	0.963386			ort001685	202.528	-2.52629	1.47688	-1.71056	0.0871624	0.999867			ort001015	1498.38	-2.52512	1.40528	-1.79689	0.0723536	NA			ort006966	32118.8	-2.29643	1.28409	-1.78837	0.0737164	0.999494			ort001554	5869.47	2.41861	1.32738	1.82209
ort009042	8967.88	-2.92782	1.5449	-1.89515	0.0580727	0.7254			ort009221	534.725	-2.3566	1.35726	-1.73629	0.0825128	NA			ort004275	11.4503	-6.66983	3.89997	-1.71023	0.0872239	0.999867			ort010247	497.941	12.156	6.76657	1.79647	0.0724195	NA			ort010305	173.427	-2.882	1.61221	-1.78761	0.0738386	NA			ort001303	344.399	12.3293	6.76674	1.82204
ort007645	875.06	2.98822	1.5783	1.89332	0.0583157	0.7254			ort002955	12.948	-6.97388	4.01767	-1.7358	0.0825983	NA			ort009744	418.59	2.35878	1.38043	1.70873	0.0875016	0.999867			ort011645	372.944	2.678	1.49146	1.79555	0.072566	NA			ort007452	163.725	2.90697	1.62638	1.78738	0.0738754	NA			ort005632	192.965	-3.00988	1.65223	-1.82171
ort009659	242.601	3.16728	1.67316	1.89299	0.0583595	NA			ort001500	890.469	2.28783	1.31948	1.73389	0.0829377	0.963386			ort004867	302.862	-2.4199	1.41655	-1.7083	0.08758	0.999867			ort000491	85.0934	-3.26634	1.81932	-1.79537	0.0725951	NA			ort009952	23.3548	5.6417	3.15702	1.78703	0.073932	NA			ort007211	1689.21	-2.47321	1.35792	-1.82132
ort011273	36827.5	-2.91788	1.54168	-1.89267	0.0584021	0.7254			ort008287	114.069	2.85627	1.64738	1.73382	0.0829498	NA			ort000761	19.8314	-4.97444	2.9141	-1.70702	0.0878174	0.999867			ort007504	218.926	-2.80493	1.56316	-1.7944	0.0727498	NA			ort009785	55.4577	3.81928	2.13792	1.78644	0.0740274	NA			ort006461	28.9117	5.27606	2.89712	1.82114
ort008853	113.461	3.43994	1.81824	1.89191	0.0585029	NA			ort009021	36.3883	3.93545	2.27033	1.73342	0.0830205	NA			ort008428	129.459	2.66952	1.56403	1.70682	0.0878552	0.999867			ort001848	682.458	-2.57937	1.43793	-1.79381	0.0728439	NA			ort010197	669.939	-2.45099	1.37412	-1.78367	0.0744766	NA			ort005412	569.613	-2.61899	1.4385	-1.82064
ort003975	63.3231	-3.73846	1.97662	-1.89135	0.0585782	NA			ort007211	1079.64	-2.2706	1.31001	-1.73327	0.0830483	0.963386			ort010055	253.838	2.45045	1.43581	1.70667	0.0878841	0.999867			ort001341	490.773	12.135	6.76657	1.79338	0.0729121	NA			ort003224	430.159	-12.0659	6.76663	-1.78315	0.0745611	NA			ort007934	149.322	3.13356	1.72267	1.81902
ort011098	426.876	-3.04354	1.61048	-1.88984	0.0587793	0.7254			ort000934	11.7586	7.16151	4.13595	1.73153	0.083358	NA			ort004495	922.234	-2.27037	1.33091	-1.70588	0.08803	0.999867			ort010652	284.782	-2.72008	1.51971	-1.78987	0.0734755	NA			ort011033	264.732	2.67828	1.50299	1.78196	0.0747549	NA			ort010459	238.026	-2.89631	1.59259	-1.81862
ort004007	152.169	3.30395	1.74842	1.88968	0.0588007	NA			ort003450	11.7586	7.16151	4.13595	1.73153	0.083358	NA			ort009977	223.75	11.5379	6.76686	1.70506	0.0881835	0.999867			ort009871	56.0106	3.64322	2.03605	1.78936	0.073557	NA			ort001367	25.3091	-5.50538	3.0899	-1.78173	0.0747931	NA			ort005934	176.695	3.02983	1.66661	1.81796
ort003870	41646.1	-2.91146	1.54079	-1.88959	0.0588128	0.7254			ort006983	11.7586	7.16151	4.13595	1.73153	0.083358	NA			ort008328	114.779	2.71936	1.59492	1.70502	0.0881907	0.999867			ort003288	377.503	2.65946	1.4868	1.78871	0.0736612	NA			ort010648	269.031	-2.6703	1.50025	-1.77991	0.075091	NA			ort007074	336.838	12.2972	6.76675	1.8173
ort004956	139.153	3.33856	1.76725	1.88913	0.0588745	NA			ort005691	77.4683	3.11092	1.7978	1.73041	0.0835576	NA			ort004586	7339.08	-2.20386	1.29271	-1.70484	0.0882248	0.999867			ort009168	137.746	-2.96895	1.66022	-1.78829	0.0737285	NA			ort008884	728.025	2.42643	1.36402	1.77888	0.0752587	0.999494			ort010168	2199.67	-2.44316	1.34547	-1.81585
ort009634	132.645	3.35873	1.77807	1.88897	0.0588957	NA			ort009330	1647.9	-2.23713	1.29286	-1.73038	0.0835632	0.963386			ort004462	3306.06	2.2122	1.29863	1.70349	0.0884761	0.999867			ort001592	13.9137	6.99503	3.91232	1.78795	0.0737838	NA			ort000412	334.048	-2.59532	1.45929	-1.77848	0.0753257	NA			ort007629	83.6499	-3.64621	2.00801	-1.81584
ort011437	35499.4	-2.90973	1.54067	-1.88862	0.0589433	0.7254			ort000837	5200.07	2.19892	1.27141	1.72951	0.0837173	0.963386			ort002399	1664.62	-2.23156	1.31052	-1.70281	0.0886045	0.999867			ort003207	93.4736	-3.18222	1.77986	-1.78791	0.0737912	NA			ort007183	280.842	-2.6452	1.48955	-1.77583	0.0757607	NA			ort009479	869.421	2.52916	1.39302	1.8156
ort011560	879.29	-2.97071	1.57391	-1.88747	0.0590969	0.7254			ort009854	153.242	2.69183	1.55671	1.72918	0.0837768	NA			ort009421	131.091	2.65204	1.55852	1.70164	0.0888221	0.999867			ort003119	3688.39	2.47194	1.38353	1.78669	0.0739873	0.692446			ort006128	104.858	3.1605	1.78063	1.77493	0.075909	NA			ort009460	517.683	-2.62576	1.44719	-1.81438
ort004691	31.5492	-4.47452	2.37091	-1.88726	0.0591256	NA			ort006636	1316.43	2.24717	1.29963	1.72908	0.0837947	0.963386			ort008373	218.859	11.506	6.76687	1.70034	0.0890662	0.999867			ort003562	58.5956	-3.54026	1.98331	-1.78503	0.0742568	NA			ort010041	104.858	3.1605	1.78063	1.77493	0.075909	NA			ort003280	124.79	-3.27474	1.80518	-1.81408
ort004014	189.519	3.21642	1.70666	1.88463	0.0594805	NA			ort000951	1165.9	2.25232	1.30381	1.72749	0.0840794	0.963386			ort011022	128.237	2.65367	1.5625	1.69835	0.0894411	0.999867			ort002198	677.543	-2.55994	1.43433	-1.78477	0.0742989	NA			ort000151	247.72	2.678	1.5115	1.77175	0.0764357	NA			ort003883	33.4	4.88814	2.69766	1.812
ort001211	197.893	-3.17787	1.68715	-1.88357	0.0596237	NA			ort005220	23.8502	4.68417	2.71181	1.72732	0.0841096	NA			ort011641	1252.45	-2.2347	1.31629	-1.69773	0.0895591	0.999867			ort005377	927.42	-2.52808	1.41711	-1.78396	0.0744297	NA			ort001116	4976.75	-2.27969	1.2871	-1.77119	0.0765296	0.999494			ort006488	391.633	2.68408	1.4821	1.81099
ort001343	36.1021	4.5554	2.41899	1.88318	0.0596757	NA			ort008736	62.3575	3.28442	1.90279	1.72611	0.0843278	NA			ort008299	69.5151	2.99037	1.76237	1.69679	0.0897357	0.999867			ort009353	1006.06	-2.52116	1.41341	-1.78374	0.0744665	NA			ort009976	95.9413	-3.22532	1.82265	-1.76957	0.0767982	NA			ort000372	49.2906	4.19864	2.32028	1.80954
ort003094	488.439	-3.00867	1.59943	-1.88109	0.0599598	0.727518			ort008152	18.9243	5.37099	3.11244	1.72565	0.0844097	NA			ort007001	27.312	3.97239	2.34123	1.69671	0.089752	0.999867			ort004971	128.18	-2.98941	1.67678	-1.78282	0.0746154	NA			ort005913	15.5921	-7.28057	4.11522	-1.76918	0.0768639	NA			ort004312	71.7284	-3.79763	2.09975	-1.80861
ort009346	195.008	3.19936	1.70095	1.88093	0.0599816	NA			ort003406	429.688	2.36993	1.37338	1.72562	0.0844164	NA			ort003458	469.162	2.3148	1.36538	1.69536	0.0900078	0.999867			ort005644	506.725	-2.59173	1.45399	-1.7825	0.074668	NA			ort010364	15.5921	-7.28057	4.11522	-1.76918	0.0768639	NA			ort006933	39.5609	-4.79565	2.65179	-1.80846
ort001478	240.54	-3.12192	1.66062	-1.87997	0.0601126	NA			ort004428	88.2132	2.9965	1.73812	1.72399	0.0847091	NA			ort011315	361.909	2.35147	1.38807	1.69406	0.0902548	0.999867			ort001386	454.243	-2.60593	1.46285	-1.7814	0.0748473	NA			ort007622	206.48	-2.75055	1.55471	-1.76918	0.0768646	NA			ort006586	98.8045	-3.45647	1.91133	-1.80841
ort009094	288.893	3.09909	1.6486	1.87984	0.0601305	0.727518			ort002032	9988.09	2.17879	1.26423	1.72341	0.0848151	0.963386			ort004545	245.684	2.43064	1.43488	1.69397	0.0902703	0.999867			ort010911	37913.1	-2.43759	1.36949	-1.77992	0.0750884	0.693855			ort011307	586.253	2.43936	1.37905	1.76887	0.0769152	NA			ort007091	29495.6	2.36963	1.31086	1.8077
ort009205	349.906	-3.05049	1.62291	-1.87964	0.0601567	0.727518			ort011023	30112.4	-2.17061	1.26036	-1.72221	0.0850306	0.963386			ort004836	76.8553	2.91507	1.72092	1.6939	0.0902836	0.999867			ort010008	270.05	-2.70823	1.52204	-1.77934	0.0751833	NA			ort004923	379.766	2.53302	1.43256	1.76818	0.0770307	NA			ort004884	8669.26	2.37754	1.31617	1.80641
ort008724	98.7475	3.48426	1.85402	1.8793	0.0602039	NA			ort009977	264.288	11.6514	6.76676	1.72186	0.0850957	NA			ort006432	1591.45	-2.21246	1.30735	-1.69233	0.0905837	0.999867			ort001921	297.391	-2.68361	1.50845	-1.77904	0.0752325	NA			ort004273	204.861	2.7446	1.55333	1.76691	0.0772435	NA			ort009351	764.082	-2.53044	1.40107	-1.80608
ort009370	27.8966	5.20489	2.77061	1.8786	0.0602987	NA			ort006183	396.015	-2.3796	1.38204	-1.7218	0.0851052	NA			ort008937	1964.79	-2.20441	1.3026	-1.69232	0.0905846	0.999867			ort007211	1899.5	-2.47448	1.39105	-1.77886	0.0752627	NA			ort001551	335.266	11.956	6.76669	1.76689	0.0772474	NA			ort005555	229.337	-2.87585	1.59434	-1.80379
ort009995	418.769	3.03078	1.614	1.8778	0.0604079	0.727518			ort009367	320.962	-2.42466	1.40888	-1.72098	0.085254	NA			ort000205	286.057	2.39112	1.41349	1.69164	0.0907142	0.999867			ort001664	35.0873	4.22687	2.37718	1.77811	0.0753864	NA			ort005167	1012.2	-2.35835	1.3349	-1.76668	0.0772822	0.999494			ort006290	204.108	2.90757	1.61525	1.80008
ort006311	184.753	-3.18227	1.69546	-1.87694	0.0605265	NA			ort011434	235.746	-2.50663	1.45833	-1.71883	0.0856457	NA			ort004296	342.743	2.3555	1.39258	1.69146	0.0907485	0.999867			ort000153	1466.61	-2.48232	1.39691	-1.77701	0.0755667	NA			ort008699	330.08	2.56581	1.45333	1.76547	0.077485	NA			ort007240	246.4	2.82085	1.5672	1.79993
ort008937	4381.02	-2.89628	1.54351	-1.87642	0.060597	0.727518			ort001544	1619.1	-2.21307	1.28824	-1.7179	0.0858148	0.963386			ort007818	1178.55	2.2244	1.31515	1.69136	0.0907672	0.999867			ort004870	315.166	-2.66184	1.49921	-1.7755	0.0758161	NA			ort008373	331.995	11.9418	6.76669	1.76479	0.0775983	NA			ort000102	308.653	12.1712	6.76678	1.79867
ort011489	181.314	3.21092	1.71155	1.87603	0.0606513	NA			ort002676	254.286	-2.48069	1.44418	-1.71771	0.0858488	NA			ort005159	2686.73	-2.18999	1.29608	-1.6897	0.0910845	0.999867			ort006967	451.14	12.0136	6.76658	1.77543	0.0758277	NA			ort007455	388.687	2.51771	1.42712	1.76419	0.0777008	NA			ort000267	409.862	-2.6487	1.47264	-1.7986
ort010639	50.8155	4.02254	2.14451	1.87573	0.060692	NA			ort006081	800.323	-2.2661	1.31934	-1.71759	0.0858708	0.963386			ort009355	14224.1	-2.16633	1.2833	-1.68809	0.0913947	0.999867			ort000445	11.8588	-7.2564	4.08914	-1.77455	0.0759719	NA			ort001669	343.652	-2.54892	1.44627	-1.76241	0.0780006	NA			ort004447	178.498	-2.99164	1.66366	-1.79822
ort002049	35.7626	4.54119	2.4213	1.87552	0.0607213	NA			ort007758	227.109	2.50918	1.46202	1.71624	0.0861179	NA			ort004843	305.886	-11.4088	6.76667	-1.68603	0.0917907	0.999867			ort002303	11.8588	-7.2564	4.08914	-1.77455	0.0759719	NA			ort011552	90.4853	3.23032	1.83716	1.75832	0.0786924	NA			ort009749	19.2749	-7.25192	4.03306	-1.79812
ort005162	35.7626	4.54119	2.4213	1.87552	0.0607213	NA			ort003762	2598.16	-2.18808	1.27552	-1.71544	0.0862643	0.963386			ort005812	11.0413	-6.61737	3.9265	-1.68531	0.091929	0.999867			ort003383	11.8588	-7.2564	4.08914	-1.77455	0.0759719	NA			ort007635	120.693	3.0135	1.71416	1.75801	0.0787462	NA			ort009123	81.8315	-3.61194	2.00889	-1.79798
ort005942	9625.23	2.88763	1.53968	1.87548	0.0607271	0.727518			ort011381	3708.78	-2.17768	1.2696	-1.71524	0.0863004	0.963386			ort008960	11.0413	-6.61737	3.9265	-1.68531	0.091929	0.999867			ort008818	2046.35	-2.4587	1.38672	-1.77303	0.0762242	NA			ort001862	169.375	2.81334	1.60036	1.75794	0.0787569	NA			ort011238	1338.96	-2.4405	1.35781	-1.79738
ort003534	615.984	-2.97278	1.58529	-1.87522	0.0607622	0.727518			ort001286	122.014	2.76722	1.61519	1.71325	0.0866673	NA			ort008577	189.855	-2.48736	1.47678	-1.68432	0.0921206	0.999867			ort003158	932.151	-2.50058	1.41125	-1.77188	0.0764137	NA			ort004235	1193.38	2.32078	1.32073	1.75719	0.0788848	0.999494			ort010590	71.0842	3.69614	2.05679	1.79704
ort011572	64.8498	3.77376	2.01269	1.87498	0.0607952	NA			ort003292	227.929	-2.50415	1.462	-1.71283	0.0867445	NA			ort000387	30.1663	3.78171	2.24576	1.68393	0.0921952	0.999867			ort007240	357.173	2.62553	1.48371	1.76957	0.0767982	NA			ort000772	24.3919	-5.45093	3.10377	-1.75623	0.079049	NA			ort003666	182.095	-2.96896	1.65502	-1.79391
ort002974	22.7701	-5.02384	2.67941	-1.87498	0.0607957	NA			ort005429	71.5726	-3.14281	1.83497	-1.71273	0.0867616	NA			ort008713	30.1663	3.78171	2.24576	1.68393	0.0921952	0.999867			ort000549	342.336	-2.62883	1.48604	-1.76902	0.0768911	NA			ort005404	24.3919	-5.45093	3.10377	-1.75623	0.079049	NA			ort008889	830.442	2.48533	1.38593	1.79326
ort009566	380.061	3.03854	1.62087	1.87463	0.0608434	0.727518			ort008084	253.09	11.5889	6.76678	1.71262	0.0867822	NA			ort008208	51.1008	-3.24007	1.9245	-1.68359	0.0922614	0.999867			ort011594	1155.36	-2.47801	1.40098	-1.76877	0.0769326	NA			ort001194	122.774	-3.00151	1.71017	-1.75509	0.0792439	NA			ort010648	163.707	-3.02845	1.68924	-1.79279
ort000184	255.674	3.11181	1.66081	1.87367	0.0609761	0.727518			ort006961	170.812	2.60519	1.5214	1.71236	0.0868304	NA			ort003431	220.302	-2.44227	1.45066	-1.68355	0.0922687	0.999867			ort006186	39.8965	3.98379	2.2541	1.76736	0.0771683	NA			ort003087	316.731	11.8739	6.7667	1.75476	0.0793009	NA			ort002809	623.389	2.52988	1.41186	1.79187
ort010163	317.019	3.06334	1.63664	1.87173	0.0612444	0.727518			ort011619	12.5015	-6.92326	4.04512	-1.71151	0.0869869	NA			ort008607	505.361	-2.28176	1.35598	-1.68273	0.0924271	0.999867			ort001883	13.492	6.95064	3.93283	1.76734	0.0771717	NA			ort000096	36.0298	-4.39438	2.50481	-1.75438	0.0793657	NA			ort003417	3573.53	-2.36308	1.32062	-1.78937
ort007694	390.7	3.02642	1.61759	1.87095	0.0613524	0.727518			ort004340	95.152	2.91161	1.70144	1.71126	0.0870332	NA			ort005425	158.59	-2.54266	1.51168	-1.68201	0.0925675	0.999867			ort002866	442.908	2.58039	1.46014	1.76722	0.0771906	NA			ort007783	125.972	2.97472	1.69589	1.75407	0.0794178	NA			ort001692	669.194	-2.5144	1.40546	-1.78902
ort005235	64.5103	3.76563	2.01316	1.87051	0.0614131	NA			ort008534	78.4747	3.0445	1.78082	1.70961	0.0873375	NA			ort009460	494.939	-2.28292	1.35726	-1.682	0.0925687	0.999867			ort010549	623.612	-2.52448	1.43036	-1.76493	0.0775755	NA			ort011551	630.773	2.39289	1.3644	1.75381	0.0794637	NA			ort006033	256.831	2.77542	1.55182	1.7885
ort002349	14.5986	6.75185	3.61087	1.86987	0.0615018	NA			ort004682	69.8562	3.134	1.8346	1.70828	0.0875852	NA			ort008509	934.684	-2.22113	1.32059	-1.68192	0.0925841	0.999867			ort001853	503.584	2.54823	1.44626	1.76195	0.0780778	NA			ort010890	315.095	11.8664	6.7667	1.75365	0.07949	NA			ort002201	58.3523	-3.9979	2.23565	-1.78825
ort011600	14.5986	6.75185	3.61087	1.86987	0.0615018	NA			ort009314	259.677	2.44951	1.43427	1.70784	0.0876662	NA			ort009945	24.5322	-4.25276	2.52876	-1.68175	0.0926165	0.999867			ort005328	96.935	3.10711	1.76357	1.76183	0.0780978	NA			ort011128	266.911	-2.60781	1.48776	-1.75285	0.0796284	NA			ort003295	220.649	-2.85403	1.59623	-1.78797
ort010055	161.111	3.23551	1.73091	1.86926	0.0615873	NA			ort010512	453.315	-2.32103	1.36036	-1.70619	0.0879723	NA			ort007920	610.392	-2.2544	1.34184	-1.68008	0.0929412	0.999867			ort008525	225.282	2.7222	1.54559	1.76127	0.0781925	NA			ort007920	1986.14	-2.2718	1.29719	-1.75133	0.0798899	0.999494			ort006934	22.3612	5.91848	3.3115	1.78725
ort008506	35.4231	4.52683	2.42365	1.86777	0.0617934	NA			ort006914	78.0502	-3.05184	1.78951	-1.70541	0.0881184	NA			ort003001	130.277	2.60394	1.54999	1.67997	0.0929629	0.999867			ort007453	9759.34	-2.4023	1.36431	-1.76081	0.0782704	0.71107			ort001639	249.641	2.62356	1.49884	1.75039	0.0800509	NA			ort007392	148.916	-3.07357	1.71973	-1.78724
ort007875	2935.76	-2.88342	1.54451	-1.86689	0.0619174	0.730843			ort003724	244.131	11.5369	6.76679	1.70493	0.0882066	NA			ort006642	38516.8	-2.14622	1.2781	-1.67922	0.093109	0.999867			ort009178	297.064	-11.9026	6.76677	-1.75897	0.0785826	NA			ort004253	58.9336	-3.64535	2.08345	-1.74967	0.0801746	NA			ort008703	205.523	2.87	1.60641	1.78659
ort011147	57.3234	3.86484	2.07055	1.86657	0.0619614	NA			ort009355	34854.9	2.13477	1.25275	1.70406	0.0883699	0.963386			ort007179	747.499	2.23094	1.32876	1.67897	0.0931577	0.999867			ort001301	428.417	-2.5637	1.45755	-1.75891	0.0785928	NA			ort001881	15.1335	-7.2375	4.13801	-1.74903	0.0802858	NA			ort001390	47.9157	4.15557	2.3261	1.78649
ort004738	449.669	2.99643	1.60563	1.8662	0.0620132	0.730843			ort001639	80.601	3.00472	1.76512	1.70227	0.0887043	NA			ort010716	23.235	4.16503	2.48281	1.67755	0.0934354	0.999867			ort010628	3208.91	-2.41033	1.37176	-1.75711	0.0788996	0.71107			ort004196	562.212	-2.40283	1.37405	-1.74872	0.0803402	NA			ort009977	291.468	12.0885	6.7668	1.78645
ort001334	77.5262	3.60409	1.93226	1.86522	0.0621506	NA			ort004890	245.686	2.45254	1.44107	1.70188	0.0887771	NA			ort009935	2875.52	-2.16416	1.29023	-1.67734	0.0934765	0.999867			ort003493	855.872	-2.472	1.40783	-1.75589	0.0791069	NA			ort005107	2279.87	-2.25832	1.29168	-1.74837	0.0804003	0.999494			ort000359	2675.6	2.36641	1.3252	1.7857
ort000692	1049.14	2.91292	1.56395	1.86255	0.0625263	0.73356			ort010890	239.651	11.5102	6.7668	1.70099	0.0889458	NA			ort003369	484.053	2.27231	1.35517	1.67677	0.0935879	0.999867			ort003809	96.0918	3.09303	1.76274	1.75468	0.0793144	NA			ort001335	742.449	2.35314	1.34688	1.7471	0.0806195	0.999494			ort000772	18.9112	-7.22444	4.04634	-1.78542
ort001909	926.789	2.91874	1.56778	1.8617	0.0626456	0.73356			ort000173	133.205	2.69122	1.58235	1.70078	0.0889852	NA			ort006016	833.549	2.21609	1.32227	1.67597	0.0937439	0.999867			ort011651	71.9697	-3.27326	1.86567	-1.75447	0.0793498	NA			ort001721	415.064	-2.46139	1.40962	-1.74613	0.0807883	NA			ort003424	148.553	-3.06963	1.71949	-1.78519
ort003031	90.2025	3.4918	1.87616	1.86114	0.0627247	NA			ort009036	749.402	-2.23864	1.31643	-1.70054	0.0890292	0.963386			ort003721	136.928	-2.5848	1.54261	-1.6756	0.0938169	0.999867			ort009351	549.627	-2.51588	1.43423	-1.75417	0.079401	NA			ort009094	319.809	2.52872	1.4487	1.74551	0.0808961	NA			ort002851	661.96	-2.50771	1.40473	-1.78519
ort008513	10.3092	-7.36691	3.95894	-1.86083	0.0627685	NA			ort005856	143.273	-2.65779	1.56437	-1.69895	0.0893287	NA			ort005761	112.611	-2.67086	1.59455	-1.67499	0.093936	0.999867			ort003017	103.883	-3.02242	1.72444	-1.7527	0.0796541	NA			ort010479	550.488	-2.39834	1.37446	-1.74493	0.0809963	NA			ort001502	225.981	2.82168	1.58074	1.78504
ort009492	10.3092	-7.36691	3.95894	-1.86083	0.0627685	NA			ort011024	508.807	2.28516	1.34508	1.6989	0.0893377	NA			ort010419	44.4378	3.30255	1.97183	1.67487	0.0939602	0.999867			ort004253	31.9266	-4.16431	2.37702	-1.7519	0.0797904	NA			ort001487	2320.38	2.24985	1.2894	1.74488	0.0810058	0.999494			ort005761	326.208	-2.68135	1.50436	-1.78239
ort000815	126.756	-3.2731	1.75923	-1.86053	0.0628106	NA			ort006627	2886.79	-2.15189	1.26684	-1.69863	0.0893893	0.963386			ort007493	28286.5	-2.13717	1.27649	-1.67426	0.0940786	0.999867			ort007134	258.363	-2.65418	1.51521	-1.75169	0.0798266	NA			ort011225	70.6581	-3.43066	1.96635	-1.74468	0.0810405	NA			ort006557	1195.01	-2.41804	1.35688	-1.78206
ort008956	349.276	3.02176	1.62418	1.86049	0.0628165	0.73356			ort005864	346.32	-2.3572	1.38828	-1.69793	0.0895218	NA			ort007926	433.838	-2.28239	1.36426	-1.67299	0.0943299	0.999867			ort008952	33.8224	4.17102	2.38378	1.74975	0.0801613	NA			ort010911	10127.1	-2.21026	1.26761	-1.74364	0.081222	0.999494			ort003322	3273.91	-2.34993	1.31889	-1.78175
ort003207	103.422	-3.36209	1.80717	-1.86042	0.062826	NA			ort000205	215.131	2.48556	1.46408	1.6977	0.089565	NA			ort006521	183.927	-2.46998	1.47716	-1.67211	0.0945018	0.999867			ort003325	714.978	2.47336	1.41494	1.74803	0.0804581	NA			ort000149	735.994	-2.34523	1.34589	-1.74251	0.0814186	0.999494			ort005813	135.17	3.09257	1.73766	1.77973
ort008316	184.087	3.16988	1.70425	1.85998	0.0628881	NA			ort011600	11.1987	7.09112	4.17695	1.69768	0.089568	NA			ort006769	119.15	-2.63655	1.57707	-1.67181	0.0945622	0.999867			ort005425	103.29	-3.01314	1.7238	-1.74796	0.0804704	NA			ort010258	29.9816	-4.72779	2.71337	-1.74241	0.0814373	NA			ort011215	119.698	-3.20829	1.80294	-1.77948
ort001181	102.686	-3.35078	1.80716	-1.85417	0.0637145	NA			ort004545	219.944	2.47721	1.45954	1.69726	0.0896481	NA			ort004490	9.17008	6.92953	4.14831	1.67045	0.0948312	0.999867			ort006432	1697.99	-2.40932	1.3791	-1.74702	0.0806335	NA			ort009542	40.9984	4.07724	2.34009	1.74234	0.0814487	NA			ort004910	66.596	3.70995	2.0856	1.77884
ort006971	213.232	3.1131	1.67944	1.85365	0.0637897	NA			ort008503	861.572	2.21486	1.30571	1.69629	0.0898306	0.963386			ort004582	9.17008	6.92953	4.14831	1.67045	0.0948312	0.999867			ort011648	13.0704	6.90484	3.95496	1.74587	0.080834	NA			ort007608	354.95	-11.7887	6.76666	-1.74217	0.0814779	NA			ort009788	1750.33	-2.37716	1.33652	-1.77861
ort008262	556.684	2.94289	1.58829	1.85287	0.063901	0.740456			ort010827	2009.62	2.15782	1.27285	1.69528	0.0900232	0.963386			ort005833	1809.66	-2.16406	1.29555	-1.67038	0.0948444	0.999867			ort010890	391.691	11.8097	6.7666	1.74529	0.0809338	NA			ort006760	262.75	2.58188	1.48323	1.74072	0.0817332	NA			ort001321	124.022	-3.1736	1.78612	-1.77681
ort010072	729.796	2.91528	1.57436	1.85173	0.064065	0.740456			ort009876	1478.8	2.17052	1.2812	1.69413	0.090241	0.963386			ort009702	69.924	2.91637	1.74611	1.67021	0.0948776	0.999867			ort009990	22.0959	5.18045	2.97056	1.74393	0.0811715	NA			ort011558	388.341	2.46308	1.41528	1.74035	0.0817976	NA			ort002013	57.2558	3.88201	2.18483	1.7768
ort008550	354.888	-2.98809	1.61405	-1.85129	0.0641272	0.740456			ort002347	216.698	2.47475	1.46096	1.69393	0.0902795	NA			ort004353	50.2829	-3.2143	1.92504	-1.66973	0.0949722	0.999867			ort004196	321.082	-2.58171	1.48131	-1.74285	0.0813599	NA			ort008494	138.077	2.88041	1.65545	1.73995	0.0818673	NA			ort004946	3484.56	2.33598	1.31482	1.77665
ort003891	52255.8	-2.83267	1.5306	-1.85069	0.0642136	0.740456			ort008550	1132.5	-2.18791	1.29163	-1.69392	0.0902811	0.963386			ort003979	49.535	3.18495	1.9078	1.66944	0.0950308	0.999867			ort000744	130.038	-2.87491	1.65123	-1.74107	0.0816716	NA			ort007292	268.919	-2.57235	1.47919	-1.73903	0.0820298	NA			ort006765	822.887	-2.45168	1.38033	-1.77615
ort001539	416.507	2.97046	1.60649	1.84903	0.0644533	0.740456			ort005098	4366.79	-2.13041	1.25853	-1.69279	0.0904962	0.963386			ort006090	335.957	-2.31419	1.38728	-1.66815	0.0952854	0.999867			ort001760	11.2659	-7.1824	4.12852	-1.7397	0.0819115	NA			ort010392	274.856	2.55804	1.47246	1.73725	0.0823427	NA			ort009178	524.785	-12.0182	6.76657	-1.77612
ort001371	49936.7	-2.82788	1.53002	-1.84827	0.0645635	0.740456			ort007535	491.628	-2.27899	1.34642	-1.69263	0.0905267	NA			ort000751	187.681	11.2843	6.76694	1.66756	0.0954026	0.999867			ort005524	11.2659	-7.1824	4.12852	-1.7397	0.0819115	NA			ort001699	2101.36	-2.2385	1.28864	-1.7371	0.0823689	0.999494			ort000135	151.464	3.00969	1.69467	1.77598
ort010715	214.939	-3.0788	1.66593	-1.84809	0.0645888	NA			ort008022	310.821	2.36756	1.39922	1.69206	0.0906339	NA			ort009949	42.1082	-3.38951	2.03271	-1.66748	0.0954185	0.999867			ort005269	2124.49	-2.38424	1.37063	-1.73953	0.0819421	NA			ort009354	344.861	-11.7471	6.76667	-1.73603	0.0825593	NA			ort011171	68.819	-3.7335	2.10355	-1.77486
ort006322	37.3828	-4.11697	2.22927	-1.84678	0.0647796	NA			ort004827	607.516	2.24527	1.32702	1.69196	0.0906527	0.963386			ort004362	279.714	-11.2798	6.76669	-1.66695	0.0955238	0.999867			ort007931	482.581	2.50363	1.43934	1.73943	0.0819587	NA			ort004318	337.106	2.49119	1.43505	1.73596	0.0825703	NA			ort003235	13041	2.30504	1.29887	1.77465
ort000185	95.0129	3.42356	1.85406	1.84652	0.0648169	NA			ort007179	673.211	2.22955	1.31881	1.69057	0.0909188	0.963386			ort001605	278.896	-11.2755	6.76669	-1.66633	0.0956481	0.999867			ort000348	384.395	-2.53696	1.45897	-1.73887	0.0820569	NA			ort009042	32523.3	-2.18413	1.25899	-1.73483	0.0827714	0.999494			ort009843	63.0401	-3.83631	2.16414	-1.77267
ort003869	66896	-2.82367	1.52936	-1.8463	0.0648483	0.740554			ort003451	56.8716	3.26524	1.93277	1.68941	0.0911401	NA			ort005008	20371.5	-2.1223	1.27378	-1.66614	0.0956858	0.999867			ort000135	78.1198	3.19133	1.83554	1.73863	0.082099	NA			ort007240	499.013	2.39333	1.37974	1.73462	0.0828073	NA			ort000935	79.2858	-3.56255	2.01052	-1.77195
ort001714	30.0764	-4.40237	2.38537	-1.84557	0.064955	NA			ort001977	93.3514	-2.87496	1.70343	-1.68775	0.0914594	NA			ort005497	67.0697	2.93207	1.76086	1.66514	0.0958856	0.999867			ort003022	549.535	-2.48094	1.42701	-1.73856	0.0821123	NA			ort004376	1883.4	2.23634	1.29019	1.73334	0.0830349	0.999494			ort007730	392.446	-2.59646	1.46604	-1.77107
ort003233	858.769	2.88559	1.56556	1.84316	0.0653052	0.740554			ort007608	282.177	-11.4191	6.76671	-1.68754	0.091499	NA			ort009753	717.459	-2.20639	1.32588	-1.66409	0.0960935	0.999867			ort001346	27.3543	-4.36635	2.51275	-1.73768	0.0822674	NA			ort009512	87.7596	3.18141	1.83635	1.73247	0.0831901	NA			ort008499	194.808	2.85618	1.61308	1.77064
ort001696	512.62	-2.922	1.58624	-1.84208	0.0654627	0.740554			ort001075	11923.3	-2.10776	1.24903	-1.68752	0.0915032	0.963386			ort011002	1193.45	2.16867	1.3035	1.66373	0.0961666	0.999867			ort010213	27.3543	-4.36635	2.51275	-1.73768	0.0822674	NA			ort005168	977.977	-2.28742	1.3205	-1.73224	0.0832302	0.999494			ort001247	804.095	-2.44015	1.37909	-1.76939
ort010122	488.549	2.92909	1.59266	1.83912	0.0658982	0.740554			ort010154	2881.23	-2.12989	1.26227	-1.68735	0.0915362	0.963386			ort007745	252.826	2.35651	1.41729	1.66269	0.0963753	0.999867			ort007769	76.3706	-3.17996	1.83039	-1.73731	0.0823316	NA			ort010459	557.341	-2.36703	1.36679	-1.73182	0.0833062	NA			ort007968	1485.72	2.36528	1.33788	1.76793
ort003286	155.339	3.17718	1.7283	1.83832	0.0660146	NA			ort003501	96.5902	-2.85087	1.68974	-1.68716	0.0915717	NA			ort011130	49.8739	-3.20125	1.9254	-1.66264	0.0963842	0.999867			ort007034	589.754	2.47082	1.42244	1.73703	0.0823825	NA			ort005090	62.285	3.50424	2.02355	1.73173	0.083322	NA			ort005625	147.663	3.00412	1.69923	1.76793
ort005376	185.163	3.11625	1.69652	1.83685	0.0662326	NA			ort005458	669.998	-2.2237	1.31825	-1.68685	0.0916318	0.963386			ort002188	11528	-2.11732	1.27375	-1.66227	0.0964579	0.999867			ort007886	156.193	-2.78281	1.60272	-1.73631	0.0825092	NA			ort000314	29.523	-4.70471	2.71803	-1.73093	0.0834645	NA			ort009730	502.965	-11.957	6.76658	-1.76706
ort002225	351.428	2.97046	1.61724	1.83674	0.0662476	0.740554			ort003321	58.7307	-3.24622	1.92513	-1.68624	0.0917505	NA			ort006523	181.882	-2.45092	1.47475	-1.66192	0.0965288	0.999867			ort011133	189.543	-2.69876	1.5588	-1.73131	0.0833969	NA			ort001464	633.352	2.33839	1.35222	1.72929	0.083757	NA			ort007117	76.9872	3.51758	1.99144	1.76635
ort009914	178.994	3.12483	1.70198	1.836	0.066357	NA			ort010660	596.658	2.23601	1.32604	1.68623	0.0917508	0.963386			ort010198	248.089	-2.36419	1.4228	-1.66164	0.0965843	0.999867			ort007787	235.414	2.63661	1.52322	1.73094	0.0834628	NA			ort002727	1820.97	-2.22973	1.28954	-1.72909	0.0837937	0.999494			ort005456	2343.88	-2.33192	1.32041	-1.76605
ort009057	48.4389	3.94907	2.15189	1.83516	0.0664818	NA			ort011206	202.707	2.48022	1.47096	1.68612	0.091772	NA			ort009049	713.863	2.20008	1.32407	1.6616	0.0965922	0.999867			ort008773	1379.2	-2.38373	1.37747	-1.73051	0.0835389	NA			ort005869	332.02	-11.6924	6.76668	-1.72793	0.084	NA			ort006386	6584.98	-2.29233	1.29959	-1.76389
ort001100	33.3614	-4.2213	2.30084	-1.83468	0.0665529	NA			ort010792	266.689	-2.39695	1.42181	-1.68585	0.0918246	NA			ort001864	503.514	-2.23866	1.34735	-1.66153	0.0966074	0.999867			ort008654	5880.66	-2.34106	1.3533	-1.72989	0.0836498	0.728311			ort007278	433.492	2.40648	1.39348	1.72696	0.0841741	NA			ort010471	95.3437	3.31086	1.87772	1.76323
ort006495	61.7943	3.6989	2.01721	1.83367	0.0667026	NA			ort010880	1137.08	-2.171	1.28796	-1.68561	0.09187	0.963386			ort007719	9365.3	-2.11693	1.27422	-1.66135	0.0966435	0.999867			ort001940	85.2085	3.10103	1.7938	1.72875	0.0838546	NA			ort000170	2248.11	2.21249	1.28155	1.72641	0.0842732	0.999494			ort005736	618.559	-2.46477	1.40007	-1.76046
ort009096	61.7943	3.6989	2.01721	1.83367	0.0667026	NA			ort003243	130.966	2.66293	1.58007	1.68533	0.0919246	NA			ort007631	207.967	2.40011	1.44578	1.66008	0.096898	0.999867			ort005107	6184.77	-2.3367	1.35215	-1.72813	0.0839645	0.728311			ort006793	938.045	-2.2788	1.32024	-1.72605	0.0843392	0.999494			ort006094	18.1838	-7.16786	4.07563	-1.75871
ort008952	41.252	4.14351	2.26149	1.8322	0.0669212	NA			ort005555	141.041	-2.63151	1.56206	-1.68465	0.0920567	NA			ort010788	13334.2	-2.11227	1.27243	-1.66003	0.0969084	0.999867			ort008889	474.149	2.47367	1.43411	1.72488	0.0845489	NA			ort009015	1305.76	2.24507	1.30116	1.72544	0.0844479	0.999494			ort002295	196.079	-2.83785	1.61379	-1.7585
ort001449	97.1914	-3.32343	1.81461	-1.83149	0.067028	NA			ort006760	218.15	2.44067	1.45322	1.67949	0.0930571	NA			ort007206	10.6324	-6.56292	3.95486	-1.65946	0.0970234	0.999867			ort003420	2856.11	-2.3435	1.35878	-1.7247	0.0845812	0.728311			ort008978	275.773	2.52525	1.465	1.72372	0.084758	NA			ort005388	114.751	3.14736	1.79073	1.75759
ort009356	769.011	-2.8613	1.56381	-1.8297	0.0672951	0.740554			ort011316	478.918	2.25306	1.34215	1.67869	0.0932124	NA			ort011225	10.6324	-6.56292	3.95486	-1.65946	0.0970234	0.999867			ort005197	38.1063	-3.81382	2.21177	-1.72433	0.0846478	NA			ort003835	1043.19	2.2595	1.31169	1.72259	0.0849627	0.999494			ort002377	736.647	-2.42722	1.38117	-1.75736
ort008266	80.6391	3.48125	1.9034	1.82896	0.0674055	NA			ort008096	287.092	2.35724	1.40488	1.6779	0.0933665	NA			ort001669	201.09	-2.41294	1.4549	-1.6585	0.0972173	0.999867			ort001027	19561.1	2.31858	1.34529	1.72347	0.0848034	0.728311			ort000591	1395.46	-2.22909	1.29588	-1.72013	0.085408	0.999494			ort008707	42.7401	4.21621	2.40004	1.75673
ort009017	721.423	2.86841	1.56887	1.82833	0.0674998	0.740554			ort003490	210.176	-2.45198	1.4619	-1.67725	0.0934934	NA			ort007615	267.446	-11.2151	6.7667	-1.65739	0.097441	0.999867			ort005752	637.724	-2.42813	1.40939	-1.72282	0.0849218	NA			ort009350	926.612	2.2649	1.31744	1.71917	0.0855832	0.999494			ort007320	284.324	2.65686	1.51332	1.75565
ort007593	33.7256	4.45283	2.43644	1.8276	0.0676101	NA			ort002687	78.3613	2.95892	1.76441	1.677	0.0935416	NA			ort006219	76.0415	2.82471	1.7058	1.65594	0.0977341	0.999867			ort001918	251.669	-2.59031	1.50471	-1.72147	0.0851663	NA			ort008949	29.0644	-4.68125	2.72311	-1.71908	0.0855993	NA			ort011520	251.597	11.8763	6.76686	1.75507
ort009385	33.7256	4.45283	2.43644	1.8276	0.0676101	NA			ort009589	1047.4	-2.16012	1.28811	-1.67697	0.0935491	0.963386			ort001872	1670.28	-2.13734	1.29123	-1.65528	0.0978679	0.999867			ort009518	51.3727	3.50807	2.03988	1.71974	0.0854796	NA			ort000579	79.631	-3.23781	1.88356	-1.71898	0.085618	NA			ort004014	409.218	2.54091	1.44787	1.75493
ort005783	241.841	-3.00303	1.64517	-1.82536	0.0679474	NA			ort005168	664.754	-2.20163	1.31407	-1.67542	0.0938514	0.963386			ort003772	1011.09	-2.16235	1.30645	-1.65513	0.0978986	0.999867			ort009867	2454.22	-2.33649	1.35889	-1.71941	0.0855406	NA			ort003220	11690	-2.15767	1.25526	-1.7189	0.085633	0.999494			ort006380	188.945	2.83143	1.61364	1.75468
ort006552	544.179	2.88709	1.58227	1.82466	0.0680531	0.740554			ort001430	668.951	2.19867	1.31275	1.67487	0.0939606	0.963386			ort002193	550.127	2.21061	1.33649	1.65404	0.0981199	0.999867			ort006146	960.545	-2.38061	1.38539	-1.71837	0.0857292	NA			ort005461	5679.87	2.16751	1.26101	1.71886	0.0856399	0.999494			ort008532	272.881	2.66819	1.52119	1.75401
ort004326	36118	-2.77965	1.52402	-1.82389	0.0681683	0.740554			ort006125	183.343	2.4914	1.48761	1.67477	0.0939799	NA			ort002492	193.287	2.40655	1.45541	1.65352	0.0982244	0.999867			ort007215	60.0318	-3.31502	1.92976	-1.71784	0.0858257	NA			ort001089	21.1742	5.49731	3.19848	1.71873	0.0856644	NA			ort003309	468.052	-11.8532	6.76659	-1.75173
ort004601	421.093	2.91362	1.59867	1.82253	0.0683743	0.740554			ort006412	859.991	2.16595	1.29562	1.67175	0.0945735	0.963386			ort010945	384.553	2.25373	1.36436	1.65185	0.0985644	0.999867			ort000126	1912.99	2.3404	1.36311	1.71696	0.0859871	NA			ort006089	77.1163	3.24943	1.89212	1.71735	0.0859158	NA			ort003979	162.946	2.89798	1.65638	1.74959
ort009608	61.4535	-3.57641	1.96408	-1.8209	0.0686214	NA			ort005096	280.04	2.34751	1.40545	1.6703	0.0948606	NA			ort001740	904.013	-2.16246	1.30949	-1.65138	0.0986617	0.999867			ort005901	252.464	2.58015	1.50433	1.71514	0.0863186	NA			ort000751	265.487	11.6193	6.76675	1.71712	0.0859577	NA			ort011617	1297.63	2.33267	1.33508	1.74721
ort008013	61065.1	-2.77088	1.52266	-1.81977	0.0687948	0.740554			ort005990	423.181	2.25681	1.35125	1.67017	0.094886	NA			ort000022	1620.22	-2.12954	1.29011	-1.65066	0.098808	0.999867			ort005474	393.697	-2.47916	1.44545	-1.71514	0.0863187	NA			ort008535	2787.16	2.18117	1.27123	1.71579	0.0861997	0.999494			ort008385	123.982	-3.08617	1.76814	-1.74544
ort007289	248.014	-2.98343	1.64047	-1.81864	0.0689657	0.740554			ort009444	46.5732	3.40465	2.04198	1.66733	0.0954494	NA			ort010117	173.009	11.1669	6.76698	1.6502	0.0989023	0.999867			ort005337	897.483	-2.37512	1.38621	-1.71339	0.0866411	NA			ort007253	224.772	-2.58215	1.50577	-1.71484	0.0863754	NA			ort010907	60.8581	-3.78186	2.16861	-1.74391
ort010517	21.2974	-4.92431	2.70784	-1.81854	0.0689817	NA			ort009965	753.556	2.16916	1.30143	1.66675	0.0955637	0.963386			ort011061	442.056	2.2294	1.35122	1.64992	0.098959	0.999867			ort009992	42937.2	2.29272	1.33907	1.71218	0.0868642	0.731986			ort008286	1073.53	-2.24017	1.30658	-1.71453	0.0864321	0.999494			ort001075	1704.95	-2.3026	1.32118	-1.74283
ort004522	7225.47	-2.77434	1.52596	-1.8181	0.0690492	0.740554			ort001414	281.771	-2.33996	1.40435	-1.66622	0.0956689	NA			ort004121	116.287	-2.59575	1.57343	-1.64974	0.098997	0.999867			ort011105	1414.72	-2.33817	1.36745	-1.70988	0.0872879	NA			ort008415	143.185	-2.79891	1.63253	-1.71446	0.0864435	NA			ort007809	55.0792	-3.90924	2.24461	-1.74161
ort006511	545.977	-2.8658	1.57654	-1.81778	0.0690983	0.740554			ort008122	2616.61	2.08952	1.25485	1.66515	0.0958822	0.963386			ort008527	5520.4	-2.09576	1.27176	-1.64791	0.0993702	0.999867			ort010479	370.757	-2.47567	1.44879	-1.70879	0.0874902	NA			ort000147	4154.46	-2.16559	1.26318	-1.71439	0.0864567	0.999494			ort001229	386.911	-2.53136	1.4538	-1.7412
ort007425	502.99	-2.87247	1.58094	-1.81694	0.0692258	0.740554			ort006366	606.162	2.19033	1.31582	1.66461	0.0959909	0.963386			ort005253	1351.3	-2.13029	1.29346	-1.64697	0.0995637	0.999867			ort006118	63.2706	3.2736	1.91622	1.70837	0.0875681	NA			ort010549	1191.18	-2.22966	1.30073	-1.71416	0.0865	0.999494			ort006469	3282.41	-2.26358	1.30025	-1.74089
ort004304	573.721	2.86563	1.57725	1.81685	0.0692401	0.740554			ort007783	66.4966	3.05457	1.83516	1.66447	0.096019	NA			ort009519	746.904	2.16505	1.31532	1.64603	0.0997567	0.999867			ort001649	1017.88	2.35308	1.37849	1.707	0.0878228	NA			ort004014	599.786	2.31385	1.35008	1.71386	0.0865541	NA			ort008485	6094.2	2.24512	1.2898	1.74067
ort007608	312.957	-12.2903	6.76683	-1.81625	0.0693318	0.740554			ort009702	66.4966	3.05457	1.83516	1.66447	0.096019	NA			ort008041	346.986	-2.26052	1.37403	-1.64518	0.0999337	0.999867			ort004128	30.1477	-4.07685	2.38912	-1.70642	0.0879299	NA			ort003222	34.1955	-4.3153	2.51808	-1.71373	0.0865783	NA			ort002310	60.7329	3.69112	2.12082	1.74042
ort007556	40853.8	-2.76384	1.52197	-1.81596	0.069376	0.740554			ort002637	74.4784	-2.97589	1.78871	-1.6637	0.0961715	NA			ort006967	168.73	11.1307	6.76699	1.64486	0.0999996	0.999867			ort003899	7032.06	-2.28715	1.3412	-1.7053	0.0881381	0.731986			ort003295	426.39	-2.3806	1.38974	-1.71299	0.0867146	NA			ort001821	1914.42	-2.28916	1.31545	-1.74021
ort006764	206.839	-3.01668	1.66217	-1.8149	0.0695388	NA			ort010220	1749.84	-2.10023	1.26335	-1.66243	0.0964264	0.963386			ort002315	23.3054	-4.17476	2.54304	-1.64164	0.100664	0.999867			ort002767	84.5794	-3.02116	1.7717	-1.70523	0.088152	NA			ort003473	158.014	2.73486	1.59696	1.71254	0.0867966	NA			ort000054	686.455	-2.40064	1.37971	-1.73996
ort009360	32.625	-4.18736	2.30738	-1.81477	0.0695593	NA			ort003113	10.6387	7.01712	4.22204	1.66202	0.0965084	NA			ort011314	108.521	-2.60893	1.58943	-1.64143	0.100708	0.999867			ort002645	230.654	-11.5375	6.76686	-1.70501	0.0881934	NA			ort008724	181.766	2.66447	1.55616	1.71221	0.086858	NA			ort008351	3314.75	-2.25962	1.29926	-1.73916
ort001418	382.724	2.91081	1.60406	1.81465	0.0695772	0.740554			ort007615	250.03	-11.2446	6.76674	-1.66175	0.0965631	NA			ort008394	3229.12	2.09111	1.27404	1.64132	0.100731	0.999867			ort005096	288.078	2.52303	1.48001	1.70473	0.0882442	NA			ort001802	674.967	-2.2833	1.33684	-1.70798	0.0876397	NA			ort007769	60.4944	-3.77258	2.1694	-1.739
ort000951	1059.33	2.81492	1.55126	1.8146	0.069585	0.740554			ort009008	15072.3	2.05474	1.2373	1.66066	0.0967815	0.963386			ort002857	95.6168	2.6569	1.61893	1.64115	0.100766	0.999867			ort008806	1570.45	-2.32133	1.362	-1.70435	0.0883156	NA			ort007006	763.987	2.26444	1.32595	1.70779	0.0876751	0.999494			ort005206	1447.12	-2.30645	1.3266	-1.73861
ort004291	562.344	-2.8561	1.57412	-1.81441	0.0696139	0.740554			ort000445	11.6085	-6.81634	4.10557	-1.66027	0.0968605	NA			ort006628	91889.6	-2.06935	1.26184	-1.63995	0.101015	0.999867			ort001449	56.0525	-3.3332	1.95665	-1.70352	0.0884704	NA			ort004302	106.005	-2.97059	1.74118	-1.70608	0.0879939	NA			ort000363	79.7768	3.39853	1.95506	1.73833
ort008764	225.416	-2.99499	1.65078	-1.81429	0.0696331	NA			ort003839	25.9765	4.2011	2.53207	1.65916	0.0970843	NA			ort008953	274.648	2.29023	1.3966	1.63987	0.101033	0.999867			ort010348	10121.1	2.28028	1.33859	1.7035	0.0884743	0.731986			ort008534	129.986	2.82751	1.65779	1.70559	0.0880836	NA			ort005906	45.166	4.06537	2.339	1.73808
ort000399	56167.8	-2.75799	1.52108	-1.81317	0.0698049	0.740554			ort004888	25.9765	4.2011	2.53207	1.65916	0.0970843	NA			ort010713	28.0061	-3.83491	2.33906	-1.63951	0.101106	0.999867			ort010107	10.673	-7.10439	4.17166	-1.70301	0.0885658	NA			ort007873	1222.75	-2.20834	1.29517	-1.70506	0.0881836	0.999494			ort006217	95.0199	3.24047	1.86487	1.73764
ort009293	197.217	3.04182	1.67885	1.81185	0.0700092	NA			ort000860	94.9251	2.78122	1.67633	1.65911	0.0970943	NA			ort007397	25.478	3.86547	2.35822	1.63915	0.101182	0.999867			ort008373	320.858	11.5219	6.76664	1.70276	0.0886137	NA			ort002809	593.245	2.29483	1.34657	1.7042	0.0883439	NA			ort004319	178.742	-2.83298	1.63056	-1.73743
ort008939	72.7731	3.50504	1.93577	1.81068	0.0701911	NA			ort007666	563.296	2.18836	1.31929	1.65874	0.0971685	0.963386			ort007240	295.855	2.27335	1.38702	1.63902	0.101209	0.999867			ort004443	1726.53	-2.31302	1.35869	-1.7024	0.0886812	NA			ort000296	233.918	2.53632	1.48907	1.70329	0.0885141	NA			ort004557	153.161	-2.92015	1.68159	-1.73654
ort001072	109.105	3.26051	1.8012	1.81019	0.070267	NA			ort003814	130.991	-2.60622	1.57139	-1.65854	0.0972083	NA			ort001227	397.864	-2.22007	1.35673	-1.63633	0.10177	0.999867			ort003750	1140.56	-2.33291	1.37097	-1.70165	0.0888204	NA			ort000225	2876.88	2.15391	1.26471	1.70308	0.0885526	0.999494			ort001798	13.7485	7.68298	4.42673	1.73559
ort009795	168.213	-3.06149	1.69143	-1.80999	0.0702966	NA			ort010217	46.0133	3.38554	2.04348	1.65675	0.0975707	NA			ort001664	14.4697	5.1036	3.12192	1.63476	0.102098	0.999867			ort006988	31.7143	4.07284	2.39625	1.69967	0.0891923	NA			ort009505	226.001	2.54712	1.49633	1.70224	0.0887095	NA			ort010304	837.238	-2.35621	1.35907	-1.73369
ort003135	179.391	3.0652	1.6936	1.80988	0.070315	NA			ort003760	217.327	-2.3951	1.44594	-1.65642	0.0976358	NA			ort011557	1229.16	2.10786	1.29038	1.63352	0.10236	0.999867			ort006349	36.9204	-3.76491	2.21642	-1.69864	0.0893865	NA			ort000105	382.456	2.37229	1.39693	1.69822	0.0894664	NA			ort001979	8435.59	-2.2228	1.28304	-1.73244
ort003012	53.5888	3.76073	2.07901	1.80891	0.0704653	NA			ort010084	280.373	2.31631	1.39898	1.65571	0.0977802	NA			ort007299	962.442	-2.1226	1.29962	-1.63325	0.102417	0.999867			ort009852	1148.6	-2.32586	1.36933	-1.69855	0.0894048	NA			ort010502	282.886	2.45766	1.44731	1.69808	0.0894918	NA			ort006796	130.812	-3.01105	1.73855	-1.73192
ort002842	301.912	-12.2384	6.76684	-1.80859	0.070515	0.740554			ort009997	112.049	2.67382	1.6152	1.65541	0.0978408	NA			ort001881	10.2235	-6.50633	3.98492	-1.63274	0.102524	0.999867			ort008326	740.038	-2.35491	1.38836	-1.69618	0.0898516	NA			ort006342	13.0835	7.27693	4.29002	1.69625	0.089839	NA			ort005752	652.185	-2.39002	1.38067	-1.73106
ort008715	265.467	2.96216	1.63793	1.80847	0.0705326	0.740554			ort011001	181.587	-2.45574	1.48366	-1.65519	0.0978853	NA			ort003257	10.2235	-6.50633	3.98492	-1.63274	0.102524	0.999867			ort009896	9956.29	-2.26104	1.33454	-1.69425	0.0902182	0.731986			ort007859	13.0835	7.27693	4.29002	1.69625	0.089839	NA			ort002884	1120.86	-2.31399	1.337	-1.73073
ort003726	4455.8	2.7608	1.52662	1.80844	0.070538	0.740554			ort004072	121.674	2.62562	1.58768	1.65374	0.09818	NA			ort005139	10.2235	-6.50633	3.98492	-1.63274	0.102524	0.999867			ort011327	39072.5	-2.25526	1.33124	-1.69411	0.0902449	0.731986			ort005617	473.894	-2.32051	1.36811	-1.69615	0.0898575	NA			ort000577	163.674	2.84454	1.64449	1.72974
ort009922	149.907	3.12003	1.72603	1.80764	0.0706626	NA			ort006381	1583.65	-2.08653	1.26244	-1.65278	0.0983765	0.963386			ort007755	10.2235	-6.50633	3.98492	-1.63274	0.102524	0.999867			ort001693	566.908	2.38084	1.40556	1.69388	0.0902884	NA			ort009992	117388	2.10281	1.23989	1.69596	0.0898937	0.999494			ort004318	311.129	2.56054	1.48182	1.72797
ort010955	102.628	-3.23628	1.79249	-1.80547	0.0710013	NA			ort010525	136.111	2.56766	1.55357	1.65274	0.0983829	NA			ort011440	10.2235	-6.50633	3.98492	-1.63274	0.102524	0.999867			ort005202	819.597	-2.33791	1.38129	-1.69256	0.09054	NA			ort007295	210.755	-2.56158	1.5111	-1.69518	0.0900411	NA			ort002574	2370.85	-2.24735	1.30197	-1.72612
ort005694	1052.47	-2.79252	1.54716	-1.80493	0.0710852	0.740554			ort005765	63.4224	-3.07705	1.86284	-1.65181	0.0985739	NA			ort008672	87.2691	-2.70335	1.65575	-1.6327	0.102532	0.999867			ort006975	122.33	-2.77431	1.64189	-1.6897	0.0910849	NA			ort005391	557.758	2.28557	1.34846	1.69495	0.0900851	NA			ort004586	205.011	-2.73267	1.58374	-1.72546
ort003974	16.5396	-5.57636	3.08963	-1.80486	0.0710959	NA			ort003025	178.864	2.44927	1.48289	1.65169	0.0985977	NA			ort004032	503.847	2.17794	1.33398	1.63266	0.10254	0.999867			ort011509	415.61	-2.41108	1.42788	-1.68858	0.0913007	NA			ort001758	1598.47	2.16644	1.2783	1.69478	0.0901167	0.999494			ort005297	25.4746	5.08843	2.94974	1.72504
ort006293	16.5396	-5.57636	3.08963	-1.80486	0.0710959	NA			ort003602	21.6105	4.53607	2.74877	1.65022	0.0988977	NA			ort004828	12566.6	-2.05554	1.26082	-1.63032	0.103034	0.999867			ort003289	39.7138	-3.63874	2.15609	-1.68766	0.091477	NA			ort005696	279.241	-2.4552	1.4492	-1.69418	0.090232	NA			ort011179	173.741	2.79956	1.62317	1.72475
ort002467	46.7414	3.89421	2.15801	1.80453	0.0711475	NA			ort008990	36.2749	3.64857	2.21182	1.64957	0.0990299	NA			ort006053	211.846	2.32875	1.42949	1.62908	0.103295	0.999867			ort006837	207.225	-2.56617	1.5208	-1.68738	0.0915302	NA			ort002032	1750.02	2.15936	1.27463	1.69411	0.0902451	0.999494			ort011033	257.355	2.62011	1.51946	1.72437
ort003023	9.57281	-7.26	4.02349	-1.8044	0.0711684	NA			ort010277	92.5719	-2.78086	1.68677	-1.64863	0.0992232	NA			ort010304	665.54	-2.1428	1.31562	-1.62874	0.103368	0.999867			ort010084	702.106	2.34265	1.38839	1.68732	0.0915427	NA			ort007219	1094.13	2.1936	1.29539	1.69339	0.0903809	0.999494			ort004422	151.544	2.8746	1.66716	1.72425
ort009151	9.57281	-7.26	4.02349	-1.8044	0.0711684	NA			ort000437	3816.17	-2.04821	1.24241	-1.64858	0.0992347	0.963386			ort001331	162.262	-2.41128	1.4821	-1.62694	0.103751	0.999867			ort011119	3478.42	2.25864	1.33934	1.68638	0.0917228	0.734765			ort001163	1149.02	-2.18942	1.29298	-1.69332	0.0903954	0.999494			ort000931	1093.06	-2.30249	1.33551	-1.72405
ort011272	9.57281	-7.26	4.02349	-1.8044	0.0711684	NA			ort011566	51.3857	3.24225	1.96801	1.64748	0.09946	NA			ort000248	96.0257	2.61251	1.60929	1.6234	0.104505	0.999867			ort010268	247.154	2.51677	1.49342	1.68524	0.0919426	NA			ort002332	8949.18	2.10337	1.24412	1.69065	0.0909041	0.999494			ort007530	50.7054	3.85713	2.23756	1.72381
ort006107	388.187	-2.87693	1.5948	-1.80395	0.0712393	0.740554			ort010201	12259.2	-2.02975	1.23261	-1.64672	0.0996165	0.963386			ort006919	8.55875	6.82999	4.20896	1.62273	0.104648	0.999867			ort000173	92.0468	2.9306	1.73968	1.68457	0.0920719	NA			ort009830	298.65	-2.42495	1.43465	-1.69027	0.0909755	NA			ort001564	1676.83	-2.26123	1.3127	-1.72258
ort003866	2491.31	-2.75986	1.53031	-1.80347	0.0713149	0.740554			ort004047	45.4534	3.36617	2.04505	1.64601	0.0997617	NA			ort005031	2316.65	2.06128	1.27106	1.62169	0.104869	0.999867			ort005234	1859.63	2.27188	1.34914	1.68395	0.0921913	NA			ort001800	108.786	2.90151	1.71675	1.69012	0.0910047	NA			ort009711	168.889	2.80876	1.63074	1.72238
ort008201	65.9257	3.55945	1.97426	1.80292	0.0714001	NA			ort008624	165.993	2.4653	1.49791	1.64583	0.0997985	NA			ort000769	325.729	-2.22286	1.37101	-1.62133	0.104948	0.999867			ort008562	229.432	2.53317	1.50462	1.68359	0.0922606	NA			ort010349	2779.65	2.12878	1.25957	1.69009	0.0910115	0.999494			ort006850	490.241	2.42185	1.40671	1.72164
ort009354	293.811	-12.1992	6.76685	-1.80279	0.0714216	0.740554			ort000972	301.544	-2.27906	1.38508	-1.64544	0.0998794	NA			ort008084	151.001	10.9706	6.76706	1.62117	0.10498	0.999867			ort000443	274.767	-2.48094	1.47387	-1.68328	0.0923203	NA			ort008842	252.219	2.47183	1.46486	1.68741	0.0915241	NA			ort007645	2261.67	2.23915	1.30074	1.72144
ort003560	314.872	2.91686	1.61807	1.80268	0.0714388	0.740554			ort002386	251.944	2.32281	1.41191	1.64515	0.0999391	NA			ort005850	99.5289	-2.60369	1.60613	-1.6211	0.104997	0.999867			ort001696	641.848	-2.34055	1.39088	-1.68278	0.0924178	NA			ort010850	22.099	-5.30508	3.14406	-1.68734	0.0915388	NA			ort007608	405.499	-11.6462	6.7666	-1.72114
ort006081	1111.43	-2.78415	1.54495	-1.8021	0.0715295	0.740554			ort004809	375.038	-2.22532	1.35467	-1.64271	0.100444	NA			ort001941	237.457	-2.28839	1.41183	-1.62087	0.105046	0.999867			ort004409	66.0402	-3.13576	1.86345	-1.68278	0.0924186	NA			ort004938	2689.83	2.12319	1.25879	1.68669	0.0916627	0.999494			ort002131	389.7	-2.48331	1.44291	-1.72105
ort003963	134.684	-3.11698	1.72966	-1.80208	0.071533	NA			ort004833	390.606	2.21544	1.3487	1.64265	0.100456	NA			ort003344	3065.84	-2.05269	1.26674	-1.62045	0.105135	0.999867			ort007272	1564.5	-2.27604	1.35256	-1.68276	0.0924217	NA			ort001023	13.7578	-7.09999	4.21438	-1.68471	0.0920452	NA			ort004204	1641.15	-2.25718	1.31239	-1.71989
ort009786	978.504	-2.79034	1.54855	-1.80191	0.0715598	0.740554			ort011362	67.503	2.98065	1.81558	1.6417	0.100651	NA			ort010641	4026.21	-2.04585	1.26328	-1.61947	0.105347	0.999867			ort001858	208.166	2.55675	1.52066	1.68134	0.0926968	NA			ort006279	126.716	2.78549	1.65466	1.68342	0.0922947	NA			ort007232	107.009	-3.12583	1.81827	-1.71912
ort001251	101.918	3.27002	1.81683	1.79985	0.071885	NA			ort010392	62.1306	3.04911	1.85758	1.64145	0.100705	NA			ort005197	47.4203	-3.12033	1.92794	-1.61848	0.105559	0.999867			ort008884	361.337	2.41897	1.44016	1.67965	0.0930246	NA			ort007856	263.762	-2.44654	1.45448	-1.68208	0.0925537	NA			ort007009	231.644	-2.66116	1.54804	-1.71906
ort008202	5681.55	-2.73984	1.52253	-1.79954	0.0719341	0.740554			ort000668	98.0578	2.7166	1.65523	1.64122	0.100752	NA			ort004844	6634.31	-2.03718	1.25892	-1.61819	0.105621	0.999867			ort005412	617.3	-2.33626	1.39164	-1.67879	0.0931934	NA			ort006033	255.317	2.45253	1.45908	1.68087	0.0927881	NA			ort001478	170.781	-2.81024	1.63517	-1.71862
ort003613	13.2406	6.61099	3.67553	1.79865	0.0720744	NA			ort007282	935.962	2.09774	1.27852	1.64075	0.100849	0.963386			ort005923	902.357	-2.09475	1.29571	-1.61668	0.105947	0.999867			ort009042	78893	-2.22182	1.32382	-1.67834	0.0932807	0.734765			ort011327	42615.3	-2.07288	1.23378	-1.68011	0.0929359	0.999494			ort008983	683.262	2.35047	1.36804	1.71812
ort011138	71.7546	3.4829	1.93665	1.79842	0.0721112	NA			ort010707	2398.45	2.04298	1.24628	1.63926	0.101159	0.963386			ort003292	267.289	-2.24879	1.39257	-1.61485	0.106343	0.999867			ort010279	543.033	2.35206	1.40163	1.67808	0.0933308	NA			ort001692	745.149	-2.20944	1.3153	-1.6798	0.0929966	0.999494			ort003191	64.0912	-3.6228	2.11097	-1.71618
ort009516	887.354	2.79242	1.55294	1.79815	0.0721535	0.740554			ort010618	178.619	11.0862	6.76692	1.63829	0.101361	NA			ort010890	146.11	10.9231	6.76708	1.61415	0.106495	0.999867			ort000945	11.8055	6.75799	4.02831	1.67763	0.0934202	NA			ort001789	1115.65	2.16324	1.28797	1.67958	0.0930388	0.999494			ort007661	495.133	2.40683	1.40272	1.71583
ort005761	155.073	-3.05686	1.70155	-1.79652	0.0724126	NA			ort006967	177.499	11.0771	6.76692	1.63695	0.101641	NA			ort009318	536.803	-2.13322	1.3228	-1.61265	0.10682	0.999867			ort007083	11.8055	6.75799	4.02831	1.67763	0.0934202	NA			ort001303	221.33	11.3569	6.76682	1.67832	0.0932847	NA			ort008292	132.591	-2.95739	1.72404	-1.71539
ort004032	739.197	2.80054	1.55927	1.79606	0.0724852	0.740554			ort009561	559.332	-2.14695	1.31164	-1.63685	0.101663	NA			ort005773	27.7209	3.65046	2.26366	1.61264	0.106823	0.999867			ort010403	11.8055	6.75799	4.02831	1.67763	0.0934202	NA			ort001357	1577.8	-2.13082	1.2708	-1.67675	0.0935913	0.999494			ort011452	749.947	-2.32979	1.35934	-1.71391
ort003512	2804.17	2.74269	1.52764	1.79538	0.0725936	0.740554			ort003714	440.715	-2.18359	1.33403	-1.63684	0.101664	NA			ort009732	144.887	10.911	6.76709	1.61236	0.106884	0.999867			ort008182	1266.22	-2.27582	1.35663	-1.67756	0.093434	NA			ort002016	37.7275	3.94986	2.35791	1.67515	0.0939046	NA			ort001212	320.553	-2.52558	1.4737	-1.71377
ort004890	193.483	3.01086	1.67706	1.79532	0.0726034	NA			ort011342	829.183	-2.10056	1.28377	-1.63624	0.101789	0.963386			ort005607	25912.8	-2.01843	1.2521	-1.61204	0.106953	0.999867			ort003087	285.019	11.3511	6.76667	1.6775	0.093445	NA			ort000730	1727.39	-2.12183	1.26666	-1.67514	0.0939076	0.999494			ort005901	224.766	2.64871	1.54594	1.71333
ort004840	277.803	-2.9114	1.62168	-1.79529	0.0726068	0.740554			ort002993	51.92	-3.21765	1.96812	-1.63489	0.102073	NA			ort011216	191.276	-2.32679	1.44354	-1.61186	0.106992	0.999867			ort006229	3624.33	-2.23739	1.33442	-1.67667	0.093607	0.734765			ort011257	3812.46	-2.08756	1.24657	-1.67464	0.0940042	0.999494			ort001549	47.4819	-4.02393	2.34905	-1.71301
ort000439	128.114	-3.11698	1.73759	-1.79385	0.0728365	NA			ort010510	948.361	-2.0853	1.27578	-1.63452	0.102149	0.963386			ort004689	281.795	-2.2298	1.38407	-1.61104	0.107171	0.999867			ort009036	637.104	-2.32772	1.38851	-1.67642	0.0936569	NA			ort003371	79.1238	3.10187	1.85287	1.67409	0.0941126	NA			ort010643	2197.73	-2.22295	1.29816	-1.71238
ort005850	172.913	-3.01699	1.68238	-1.79329	0.0729272	NA			ort003228	175.504	2.41685	1.4793	1.63378	0.102304	NA			ort008381	79.1024	2.687	1.66872	1.61022	0.10735	0.999867			ort007001	25.6402	4.36603	2.60467	1.67623	0.0936931	NA			ort009036	961.564	-2.16279	1.29353	-1.672	0.0945245	0.999494			ort011244	1146.53	-2.27251	1.32721	-1.71225
ort000281	2100.63	-2.74322	1.52997	-1.79299	0.0729746	0.740554			ort009519	818.896	2.09438	1.28264	1.63286	0.102498	0.963386			ort002531	775.871	-2.09291	1.29997	-1.60996	0.107406	0.999867			ort000508	201.007	-11.3391	6.76692	-1.67566	0.0938046	NA			ort005883	398.615	-2.30589	1.37922	-1.67188	0.094548	NA			ort006372	527.147	-2.38804	1.39532	-1.71146
ort011119	2808.47	-2.7354	1.52619	-1.79231	0.0730841	0.740554			ort009788	1544.14	-2.04802	1.25495	-1.63195	0.10269	0.963386			ort005393	268.309	-2.2326	1.38895	-1.6074	0.107967	0.999867			ort001435	1908.59	2.25355	1.34489	1.67564	0.0938096	NA			ort008381	111.884	2.8344	1.69541	1.6718	0.0945632	NA			ort006325	2639.97	-2.21133	1.29225	-1.71122
ort005852	275.402	-12.1058	6.76688	-1.78899	0.073617	0.740554			ort008920	2981.75	-2.02217	1.23938	-1.63159	0.102766	0.963386			ort004809	305.497	-2.20626	1.37262	-1.60733	0.107981	0.999867			ort008849	39.1209	-3.61528	2.15804	-1.67526	0.0938825	NA			ort009158	24911.2	-2.05816	1.23113	-1.67176	0.0945719	0.999494			ort000063	200.83	2.69209	1.57394	1.71042
ort005900	118.046	3.17301	1.77378	1.78885	0.0736396	NA			ort003523	367.781	-2.20598	1.35229	-1.63129	0.102828	NA			ort004801	84.8154	-2.65578	1.65314	-1.60651	0.108161	0.999867			ort007604	182.513	2.58392	1.543	1.67461	0.0940106	NA			ort006242	271.904	-2.40967	1.44261	-1.67035	0.0948505	NA			ort006742	177.248	-2.76836	1.61887	-1.71006
ort011645	253.867	2.92957	1.63777	1.78876	0.0736534	0.740554			ort002980	320.545	2.23202	1.36873	1.63072	0.10295	NA			ort010660	660.668	2.09749	1.30592	1.60614	0.108244	0.999867			ort008652	126.647	2.72862	1.63068	1.67331	0.0942673	NA			ort001821	2986.09	-2.08292	1.2484	-1.66848	0.0952205	0.999494			ort009422	745.121	2.31928	1.35634	1.70995
ort007731	816.106	2.77825	1.55332	1.78859	0.0736814	0.740554			ort006548	1292.94	-2.05457	1.26038	-1.63012	0.103077	0.963386			ort004987	691.256	2.09287	1.3033	1.60582	0.108314	0.999867			ort004714	249.627	-2.47984	1.48273	-1.67248	0.0944299	NA			ort000837	20006.7	2.05251	1.23024	1.66838	0.0952403	0.999494			ort007068	5830.92	2.17789	1.27555	1.70741
ort007796	153.6	-3.04143	1.70091	-1.78812	0.073757	NA			ort008506	21.0505	4.49654	2.75921	1.62965	0.103176	NA			ort000439	114.036	-2.50128	1.55815	-1.60529	0.108431	0.999867			ort008084	276.165	11.3055	6.76667	1.67077	0.0947673	NA			ort011315	879.556	2.16346	1.29713	1.66788	0.0953395	0.999494			ort004280	157.123	2.80751	1.64563	1.70604
ort000862	3072.22	-2.72199	1.52359	-1.78657	0.0740077	0.740554			ort009516	1016.42	2.06954	1.26999	1.62957	0.103193	0.963386			ort006921	22142.2	-2.00542	1.24959	-1.60486	0.108525	0.999867			ort003083	2594.43	-2.22382	1.33459	-1.66629	0.0956556	NA			ort009571	295.19	2.37555	1.42447	1.66767	0.0953818	NA			ort011557	1330.53	2.24319	1.31502	1.70582
ort010126	509.096	2.81538	1.57601	1.7864	0.0740339	0.740554			ort008172	245.338	2.29529	1.40939	1.62857	0.103405	NA			ort010505	9.81452	-6.44744	4.01767	-1.60477	0.108545	0.999867			ort009148	192.113	-11.2738	6.76694	-1.66601	0.0957118	NA			ort009258	45.4613	-3.68913	2.21275	-1.66722	0.0954714	NA			ort004895	464.647	2.39587	1.40562	1.70449
ort005027	208.254	2.97046	1.66327	1.78592	0.0741125	NA			ort011011	746.262	2.09513	1.28653	1.62851	0.103416	0.963386			ort007320	67.2762	2.77273	1.72872	1.60392	0.108732	0.999867			ort011315	624.394	2.30726	1.3857	1.66505	0.0959031	NA			ort010976	1126.89	-2.13658	1.28187	-1.66677	0.0955603	0.999494			ort003266	24.7872	5.04779	2.96198	1.70419
ort004324	32.028	4.37483	2.45041	1.78534	0.0742057	NA			ort001051	1345.21	-2.04734	1.25791	-1.62757	0.103616	0.963386			ort007294	31.071	-3.54916	2.21412	-1.60297	0.108941	0.999867			ort008146	2005.01	-2.22905	1.33882	-1.66494	0.0959251	NA			ort004528	41.2474	-3.82092	2.29291	-1.66641	0.095632	NA			ort004066	34.4694	-4.5892	2.69299	-1.70412
ort004907	325.229	2.87447	1.61021	1.78515	0.0742363	0.740554			ort003087	169.66	11.012	6.76695	1.62731	0.10367	NA			ort011560	331.446	-2.18023	1.36108	-1.60184	0.109191	0.999867			ort002058	10.08	-7.02193	4.21955	-1.66414	0.0960839	NA			ort005499	41.2474	-3.82092	2.29291	-1.66641	0.095632	NA			ort003164	883.718	-2.28393	1.34088	-1.70331
ort005959	2016.19	2.72832	1.52908	1.78429	0.0743767	0.740554			ort002208	1385.31	-2.04344	1.2564	-1.62642	0.10386	0.963386			ort000225	334.511	-2.17856	1.36006	-1.60181	0.109197	0.999867			ort007080	10.08	-7.02193	4.21955	-1.66414	0.0960839	NA			ort010989	2320.11	2.08684	1.25296	1.66552	0.0958089	0.999494			ort006534	1605.91	2.22296	1.3051	1.70329
ort005458	838.101	-2.76284	1.54881	-1.78385	0.0744484	0.740554			ort006180	196.222	-2.36401	1.45364	-1.62627	0.103892	NA			ort007193	16003.8	-1.99952	1.24884	-1.6011	0.109354	0.999867			ort005761	140.948	-2.64783	1.59145	-1.66379	0.0961547	NA			ort008308	94.9589	2.93126	1.76053	1.66499	0.0959156	NA			ort006554	27.2358	-5.27121	3.09612	-1.70252
ort010917	140.004	3.08854	1.73254	1.78267	0.0746408	NA			ort005129	488.861	2.14418	1.31849	1.62624	0.103898	NA			ort007666	415.562	2.13924	1.33647	1.60067	0.10945	0.999867			ort006868	16.4311	-5.24674	3.15383	-1.66361	0.0961903	NA			ort011449	69.5708	3.18803	1.91567	1.66418	0.096076	NA			ort000980	769.994	-2.30056	1.3515	-1.70222
ort007107	105.71	3.21006	1.80079	1.78259	0.0746533	NA			ort003309	494.443	-2.14319	1.31813	-1.62593	0.103965	NA			ort010867	70.9198	-2.75141	1.71928	-1.60033	0.109526	0.999867			ort011527	2383.33	-2.21455	1.33358	-1.66061	0.0967922	NA			ort009169	19870.1	2.04236	1.22797	1.6632	0.0962726	0.999494			ort004825	16.7291	-7.04756	4.14084	-1.70196
ort008410	545.485	2.80019	1.5709	1.78254	0.0746607	0.740554			ort009899	470.731	2.14881	1.32184	1.62561	0.104032	NA			ort005990	285.871	2.19927	1.3749	1.59959	0.10969	0.999867			ort004014	568.107	2.30773	1.39009	1.66013	0.0968883	NA			ort001309	13.2992	-7.05108	4.24291	-1.66185	0.0965431	NA			ort008575	795.899	-2.29487	1.34848	-1.70182
ort011010	809.656	2.76512	1.55189	1.78178	0.0747853	0.740554			ort007233	63.6969	2.98486	1.83618	1.62558	0.104039	NA			ort007819	240.194	2.23344	1.39745	1.59823	0.109992	0.999867			ort010055	319.991	2.39922	1.44531	1.66001	0.0969122	NA			ort009492	13.2992	-7.05108	4.24291	-1.66185	0.0965431	NA			ort006862	365.857	-2.4569	1.44392	-1.70155
ort010750	252.996	-2.90073	1.62811	-1.78165	0.0748057	0.740554			ort000372	38.4011	3.49657	2.15131	1.62532	0.104095	NA			ort009646	912.357	-2.05795	1.28787	-1.59795	0.110054	0.999867			ort004169	2514.68	-2.21161	1.33235	-1.65993	0.0969291	NA			ort010360	13.2992	-7.05108	4.24291	-1.66185	0.0965431	NA			ort010205	2382.74	-2.19585	1.29072	-1.70126
ort005727	257.319	2.91131	1.63416	1.78153	0.0748254	0.740554			ort003325	840.938	2.07635	1.2779	1.62482	0.104202	0.963386			ort003158	434.02	-2.13039	1.3333	-1.59783	0.110081	0.999867			ort000589	472.067	2.33096	1.40456	1.65957	0.0970011	NA			ort004545	446.567	2.25157	1.35713	1.65906	0.0971029	NA			ort003906	13.0611	7.60898	4.47557	1.70011
ort004946	1910.59	2.7244	1.52926	1.78152	0.0748277	0.740554			ort001592	10.0788	6.93911	4.27116	1.62464	0.104239	NA			ort004585	32.8182	3.38743	2.12154	1.59669	0.110335	0.999867			ort007740	19.5661	4.99988	3.0129	1.65949	0.0970172	NA			ort006712	211.014	-2.47524	1.49218	-1.65881	0.0971544	NA			ort004550	13.0611	7.60898	4.47557	1.70011
ort001473	334.85	2.86153	1.60644	1.78129	0.0748657	0.740554			ort006448	443.287	-2.15699	1.32815	-1.62405	0.104365	NA			ort009468	3901.5	-2.00335	1.25476	-1.5966	0.110354	0.999867			ort001633	3583.39	-2.20124	1.32688	-1.65896	0.0971242	0.754263			ort002637	112.771	-2.7983	1.68838	-1.65739	0.0974412	NA			ort011671	13.0611	7.60898	4.47557	1.70011
ort001859	128.346	3.11821	1.75114	1.78067	0.0749664	NA			ort009225	31.9088	3.73263	2.29999	1.62289	0.104613	NA			ort010286	700.056	-2.07212	1.2993	-1.5948	0.110757	0.999867			ort011033	202.685	2.51161	1.5146	1.65826	0.097265	NA			ort002315	84.018	-3.01181	1.81844	-1.65626	0.09767	NA			ort006990	2151.81	2.19761	1.29274	1.69996
ort010295	852.553	2.75923	1.54962	1.78058	0.0749806	0.740554			ort001478	254.861	-2.27363	1.40178	-1.62196	0.104811	NA			ort001874	16733.8	-1.987	1.24619	-1.59446	0.110833	0.999867			ort007255	134.75	2.6624	1.60594	1.65784	0.0973489	NA			ort010881	332.136	-2.31414	1.39864	-1.65456	0.0980134	NA			ort010871	46.2171	3.89581	2.29256	1.69933
ort009968	234.42	-2.91156	1.63633	-1.77932	0.0751869	NA			ort003119	1420.19	2.03188	1.25324	1.62131	0.104952	0.963386			ort002861	587.47	-2.08783	1.30948	-1.5944	0.110847	0.999867			ort005709	53.0878	-3.24679	1.95846	-1.65782	0.0973529	NA			ort005761	218.612	-2.45099	1.48152	-1.65437	0.0980518	NA			ort006647	86.0435	3.21516	1.89238	1.699
ort011420	310.878	-2.85784	1.60646	-1.77896	0.0752455	0.740702			ort010296	191.395	2.35724	1.45427	1.6209	0.105038	NA			ort003558	115.874	-2.46881	1.54863	-1.59418	0.110895	0.999867			ort008299	127.661	2.68352	1.61997	1.65652	0.0976165	NA			ort004884	5416.54	2.03868	1.23247	1.65414	0.0980995	0.999494			ort009160	1553.91	2.21549	1.30438	1.69849
ort002061	602.473	2.77968	1.56408	1.7772	0.0755354	0.740702			ort002842	206.275	-10.9671	6.7668	-1.62072	0.105077	NA			ort002711	1185.75	-2.03237	1.27609	-1.59265	0.111238	0.999867			ort002160	275.601	2.42416	1.4635	1.65642	0.0976376	NA			ort010497	53.6492	3.41935	2.06813	1.65335	0.0982594	NA			ort003839	54.8698	3.66856	2.16216	1.69671
ort005308	317.787	-2.85015	1.60394	-1.77697	0.075574	0.740702			ort000751	164.06	10.9635	6.76696	1.62016	0.105199	NA			ort001019	37.9154	3.21751	2.02061	1.59235	0.111306	0.999867			ort006819	384.553	2.35569	1.42251	1.65601	0.09772	NA			ort002882	1431.84	2.08662	1.26328	1.65174	0.0985872	0.999494			ort007236	396.64	2.41709	1.42476	1.69649
ort010905	46.8408	-3.67769	2.07146	-1.77541	0.0758306	NA			ort003484	1059.05	2.04761	1.26418	1.61971	0.105295	0.963386			ort000491	80.1147	-2.65085	1.6664	-1.59077	0.111662	0.999867			ort009058	1429.6	2.22436	1.34354	1.65559	0.0978048	NA			ort011631	2777.59	2.05171	1.24231	1.65153	0.0986302	0.999494			ort006180	337.043	-2.46917	1.4558	-1.69609
ort004873	189.62	-2.94987	1.663	-1.77382	0.0760923	NA			ort005705	460.601	-2.14137	1.32234	-1.61939	0.105364	NA			ort010252	617.096	-2.07147	1.30407	-1.58847	0.11218	0.999867			ort009203	350.426	-2.36638	1.43009	-1.65471	0.0979843	NA			ort006571	325.084	-2.31127	1.4003	-1.65055	0.0988309	NA			ort002842	359.676	-11.4733	6.76662	-1.69557
ort002670	298.518	2.86261	1.61521	1.77229	0.0763469	0.746374			ort002089	23.444	-4.31716	2.66775	-1.61828	0.105603	NA			ort003502	1050.68	-2.03025	1.27847	-1.58803	0.112279	0.999867			ort006978	221.843	2.47608	1.4966	1.65447	0.0980318	NA			ort010095	274.457	-2.36167	1.43089	-1.65049	0.098843	NA			ort003290	19.6116	5.72583	3.37922	1.69442
ort009277	237.308	-2.89169	1.6327	-1.77112	0.0765415	NA			ort002362	199.9	2.33637	1.44388	1.61811	0.105638	NA			ort001712	856.032	2.0376	1.28501	1.58567	0.112815	0.999867			ort010427	515.552	-2.30326	1.39313	-1.6533	0.0982697	NA			ort003899	9243.96	-2.02208	1.22573	-1.6497	0.0990045	0.999494			ort009231	17087.1	-2.13637	1.26153	-1.69348
ort006129	57.3808	3.58343	2.02536	1.76928	0.0768466	NA			ort008509	1642.89	-2.01793	1.24742	-1.61768	0.105731	0.963386			ort003983	158.375	-2.32902	1.46897	-1.58548	0.112856	0.999867			ort005695	11.3839	6.70552	4.05618	1.65316	0.0982982	NA			ort009105	134.46	2.66222	1.61514	1.64829	0.0992942	NA			ort005709	66.9607	-3.48231	2.06205	-1.68876
ort010945	378.143	2.81226	1.59195	1.76655	0.0773044	0.752743			ort004235	636.695	2.09156	1.29299	1.61761	0.105746	0.963386			ort001207	164.505	-2.31606	1.46098	-1.58528	0.112903	0.999867			ort011484	4772.05	2.17994	1.32044	1.65091	0.0987562	0.758863			ort004625	318.49	-2.31077	1.40242	-1.6477	0.0994137	NA			ort010753	39.303	4.08845	2.42168	1.68827
ort007719	246.684	-11.947	6.76692	-1.7655	0.0774803	0.752743			ort008047	915.691	2.05416	1.27023	1.61715	0.105845	0.963386			ort004340	83.3859	2.59247	1.63728	1.5834	0.113329	0.999867			ort002266	136.376	-2.62941	1.59322	-1.65037	0.0988666	NA			ort009395	276.377	-2.35279	1.42809	-1.6475	0.0994544	NA			ort008608	223.643	-2.60227	1.54151	-1.68813
ort006609	24762	-2.66308	1.50947	-1.76425	0.0776904	0.752743			ort010830	366.65	2.17357	1.34513	1.61588	0.10612	NA			ort003762	2051.07	-1.99196	1.25851	-1.5828	0.113468	0.999867			ort006523	360.242	-2.35131	1.42496	-1.65009	0.0989247	NA			ort007217	83.1008	-2.994	1.81807	-1.6468	0.0995996	NA			ort000445	16.3654	-7.01585	4.15932	-1.68678
ort002124	170.225	2.98022	1.68931	1.76416	0.0777048	NA			ort000126	1867.96	-2.00867	1.24311	-1.61585	0.106127	0.963386			ort003439	160.622	-2.31361	1.46386	-1.58049	0.113995	0.999867			ort004055	46.9081	-3.3399	2.0242	-1.64999	0.0989459	NA			ort008956	533.054	2.18954	1.33019	1.64604	0.0997565	NA			ort006774	16.3654	-7.01585	4.15932	-1.68678
ort007102	1073.38	2.71208	1.53772	1.7637	0.0777822	0.752743			ort010313	328.823	2.19515	1.35888	1.61541	0.106222	NA			ort000848	32.2068	3.35769	2.12472	1.58029	0.11404	0.999867			ort002584	578.351	-2.28154	1.38302	-1.64969	0.0990069	NA			ort007192	168.683	2.53894	1.54271	1.64577	0.0998111	NA			ort006808	16.3654	-7.01585	4.15932	-1.68678
ort008604	123.696	-3.0604	1.73622	-1.76268	0.0779542	NA			ort007474	869.806	2.05443	1.27211	1.61498	0.106316	0.963386			ort006294	32.2068	3.35769	2.12472	1.58029	0.11404	0.999867			ort006033	183.699	2.51979	1.52893	1.64808	0.0993371	NA			ort002652	6914.05	2.01762	1.22614	1.6455	0.0998676	0.999494			ort001150	794.647	2.25717	1.33945	1.68514
ort001827	12.5616	6.53504	3.71269	1.76019	0.0783753	NA			ort003661	43.6564	-3.3417	2.07	-1.61434	0.106453	NA			ort011300	32.2068	3.35769	2.12472	1.58029	0.11404	0.999867			ort009445	293.886	-2.385	1.44798	-1.64712	0.0995334	NA			ort004187	2447.38	2.0415	1.24192	1.64383	0.100211	0.999494			ort000716	116.57	2.93791	1.74452	1.68408
ort007233	68.6991	3.41437	1.93984	1.76013	0.0783858	NA			ort011520	157.901	10.9083	6.76698	1.61199	0.106963	NA			ort009545	184.431	-10.6789	6.76681	-1.57813	0.114535	0.999867			ort002838	84.2862	2.88004	1.75136	1.64446	0.100082	NA			ort004910	62.1119	3.23549	1.96857	1.64357	0.100265	NA			ort008186	384.853	-2.40337	1.42719	-1.68399
ort004843	238.584	-11.8988	6.76694	-1.75838	0.0786837	NA			ort000682	159.142	-2.4103	1.49576	-1.61142	0.107088	NA			ort010471	16.5599	-4.70525	2.9816	-1.5781	0.114543	0.999867			ort007266	60.2821	-3.09281	1.88368	-1.64189	0.100612	NA			ort010206	447.856	2.21569	1.34889	1.6426	0.100465	NA			ort004056	39.8846	-4.19689	2.49367	-1.68301
ort008113	422.795	2.77931	1.58104	1.7579	0.0787652	0.760322			ort007818	953.177	2.0382	1.26556	1.61051	0.107286	0.963386			ort009896	3978.68	-1.96646	1.24704	-1.5769	0.114819	0.999867			ort009038	280.753	2.38685	1.45405	1.64152	0.100689	NA			ort002433	172.871	2.5189	1.53391	1.64214	0.100561	NA			ort004038	24.0998	5.00597	2.97487	1.68275
ort000031	238.723	-2.86241	1.62846	-1.75774	0.0787921	NA			ort006907	76.4912	-2.81469	1.74822	-1.61003	0.107391	NA			ort004047	44.6443	3.01749	1.91361	1.57686	0.114829	0.999867			ort006873	62.177	3.09303	1.88451	1.64129	0.100737	NA			ort006042	472.526	2.20161	1.34159	1.64105	0.100787	NA			ort001847	427.651	-2.36721	1.409	-1.68007
ort011568	491.781	2.75823	1.57037	1.75642	0.0790169	0.760322			ort004169	2109.79	-1.99183	1.23759	-1.60944	0.10752	0.963386			ort011551	263.037	2.16916	1.37594	1.57649	0.114913	0.999867			ort006141	314.112	-2.35234	1.43564	-1.63853	0.101311	NA			ort006463	342.176	2.27181	1.38565	1.63952	0.101104	NA			ort003792	1652.59	-2.17434	1.2942	-1.68006
ort002584	165.55	-2.94625	1.67895	-1.75482	0.0792906	NA			ort002809	346.28	2.1701	1.3492	1.60843	0.107742	NA			ort001239	129.154	-2.38228	1.5118	-1.57579	0.115074	0.999867			ort004946	2690.41	2.16562	1.32199	1.63815	0.101391	NA			ort010517	47.8408	-3.52814	2.15247	-1.63912	0.101189	NA			ort006957	1833.16	-2.16576	1.2897	-1.67927
ort007237	130.101	3.05292	1.74002	1.75453	0.0793393	NA			ort007543	35777.5	1.95391	1.21495	1.60823	0.107786	0.963386			ort002089	9.40558	-6.38604	4.05281	-1.57571	0.115094	0.999867			ort010886	143.992	-2.57764	1.57367	-1.63798	0.101426	NA			ort006118	135.464	2.63335	1.60738	1.63829	0.101361	NA			ort010680	127.136	-2.88879	1.72076	-1.67879
ort010296	319.175	2.81286	1.60366	1.75402	0.0794266	0.760322			ort011621	1299.99	2.01032	1.25084	1.60718	0.108016	0.963386			ort003942	9.40558	-6.38604	4.05281	-1.57571	0.115094	0.999867			ort008727	15.8381	-5.19229	3.1703	-1.63779	0.101465	NA			ort004534	12.8406	-7.00045	4.27323	-1.63821	0.101377	NA			ort009354	332.037	-11.3579	6.76663	-1.67852
ort008898	959.912	2.69862	1.53871	1.75383	0.0794603	0.760322			ort001712	708.201	2.05891	1.28129	1.60691	0.108075	0.963386			ort005216	9.40558	-6.38604	4.05281	-1.57571	0.115094	0.999867			ort001990	24.3753	4.28941	2.61906	1.63777	0.10147	NA			ort007787	341.631	2.26903	1.38521	1.63804	0.101413	NA			ort011645	368.944	2.39568	1.42768	1.67803
ort002687	56.3622	3.55541	2.02744	1.75365	0.079491	NA			ort010947	419.693	2.12811	1.32544	1.60559	0.108364	NA			ort011337	9.40558	-6.38604	4.05281	-1.57571	0.115094	0.999867			ort006461	24.3753	4.28941	2.61906	1.63777	0.10147	NA			ort004159	43.0059	3.63189	2.21832	1.63723	0.101582	NA			ort000837	15887.9	2.10538	1.25483	1.67782
ort006090	343.895	-2.78941	1.59097	-1.75328	0.0795547	0.760322			ort002594	10.7156	-6.70086	4.17444	-1.60521	0.108447	NA			ort000922	1664.68	-1.98546	1.26014	-1.57559	0.115121	0.999867			ort002298	274.332	-2.37758	1.45259	-1.63679	0.101674	NA			ort003482	1260.84	2.0661	1.26222	1.63688	0.101656	0.999494			ort009105	59.0343	3.52188	2.09983	1.67722
ort011490	238.192	2.86672	1.6357	1.7526	0.0796711	NA			ort007569	67.3895	2.88464	1.79726	1.60503	0.108488	NA			ort006874	2971.52	1.96586	1.24901	1.57393	0.115504	0.999867			ort000412	391.299	-2.30717	1.41008	-1.6362	0.101798	NA			ort001858	221.752	2.4005	1.46742	1.63587	0.101867	NA			ort010076	45.2998	-3.95178	2.3591	-1.67512
ort002905	37.5175	3.99846	2.28235	1.7519	0.0797904	NA			ort008487	1743.6	1.99088	1.24049	1.60491	0.108513	0.963386			ort006519	94.6217	-2.51839	1.60016	-1.57384	0.115525	0.999867			ort006159	131.803	-2.60991	1.59513	-1.63617	0.101804	NA			ort010143	5540.66	-1.99885	1.22326	-1.63404	0.10225	0.999494			ort000635	26.1448	-5.21067	3.11289	-1.6739
ort008514	96.4857	3.18255	1.81705	1.75149	0.0798612	NA			ort011268	386.119	2.13915	1.33386	1.60373	0.108774	NA			ort006041	1721.07	1.98022	1.25828	1.57375	0.115545	0.999867			ort005077	246.574	2.4062	1.4707	1.63609	0.101821	NA			ort007491	153.967	-2.5579	1.56602	-1.63338	0.10239	NA			ort003893	693.453	-2.25228	1.34724	-1.67178
ort006474	159.716	-2.94706	1.68374	-1.75031	0.0800656	NA			ort010826	1950.52	-1.98373	1.23716	-1.60345	0.108836	0.963386			ort004457	1734.76	-1.97951	1.25828	-1.57318	0.115677	0.999867			ort005388	127.833	2.62909	1.60856	1.63443	0.102168	NA			ort002866	1016.44	2.07558	1.27164	1.63221	0.102635	0.999494			ort008750	33.0147	-4.52435	2.70725	-1.6712
ort002707	30.67	4.30924	2.46284	1.74971	0.0801692	NA			ort011427	507.519	-2.09413	1.30641	-1.60297	0.108941	NA			ort010550	97.6866	-2.50027	1.58952	-1.57297	0.115725	0.999867			ort006557	1790.66	-2.17033	1.328	-1.63429	0.102198	NA			ort004133	727.957	-2.11105	1.29453	-1.63074	0.102946	0.999494			ort011156	145.847	-2.77776	1.66349	-1.66984
ort000224	149.522	-2.96498	1.69502	-1.74923	0.0802519	NA			ort010206	198.666	2.3024	1.4378	1.60134	0.109302	NA			ort004355	7.94741	6.72307	4.27742	1.57176	0.116007	0.999867			ort007683	297.381	2.35509	1.44231	1.63287	0.102497	NA			ort008552	2251.86	-2.01784	1.23797	-1.62996	0.103109	0.999494			ort010198	304.915	-2.44052	1.46203	-1.66927
ort004471	183.73	-2.89834	1.66015	-1.74583	0.0808397	NA			ort010027	312.592	2.17402	1.35914	1.59955	0.109697	NA			ort008723	7.94741	6.72307	4.27742	1.57176	0.116007	0.999867			ort010957	6250.14	-2.1376	1.31003	-1.63171	0.10274	0.777855			ort006865	35.1992	-3.92045	2.40658	-1.62906	0.103301	NA			ort004016	18.9241	5.67336	3.39873	1.66926
ort000913	144.872	2.98962	1.71394	1.74429	0.0811081	NA			ort000823	1397.29	-1.98951	1.24497	-1.59803	0.110036	0.963386			ort004222	23970.7	-1.94003	1.23604	-1.56956	0.116518	0.999867			ort005900	72.3884	2.94864	1.80739	1.63144	0.102798	NA			ort008822	220.706	-2.38639	1.46613	-1.62768	0.103592	NA			ort007766	39.1573	-4.16887	2.49869	-1.66842
ort000545	37.178	3.98452	2.28447	1.74418	0.0811285	NA			ort006818	565.287	2.06657	1.2939	1.59717	0.110228	0.963386			ort001033	55.8591	2.81455	1.79377	1.56907	0.116631	0.999867			ort011144	79.477	2.88311	1.76758	1.63111	0.102867	NA			ort010838	558.414	-2.14396	1.31738	-1.62744	0.103643	NA			ort008463	153.405	-2.74309	1.64459	-1.66795
ort004988	527.209	2.72608	1.56297	1.74417	0.0811296	0.765503			ort007319	206.611	2.28026	1.42791	1.59692	0.110284	NA			ort005462	1669.98	-1.97155	1.25724	-1.56816	0.116843	0.999867			ort004340	163.447	2.51684	1.54482	1.62921	0.103268	NA			ort011181	111.166	2.71704	1.67225	1.62478	0.104209	NA			ort008892	1583.3	2.15121	1.28988	1.66776
ort003972	766.339	-2.68919	1.54208	-1.74388	0.0811803	0.765503			ort003984	79.1408	2.7456	1.71936	1.59687	0.110294	NA			ort003400	2026.12	-1.96446	1.25302	-1.56778	0.116931	0.999867			ort002622	16233.3	2.12495	1.30462	1.62878	0.103359	0.777855			ort004353	117.617	-2.68698	1.65398	-1.62456	0.104257	NA			ort011551	503.742	2.29848	1.37822	1.66772
ort009257	722.169	2.69742	1.54691	1.74374	0.0812042	0.765503			ort008315	439.163	-2.10413	1.31784	-1.59665	0.110343	NA			ort008363	41.79	3.05139	1.94657	1.56758	0.11698	0.999867			ort000149	625.904	-2.22888	1.3685	-1.62871	0.103375	NA			ort008695	4070.13	1.98689	1.22312	1.62445	0.104281	0.999494			ort008848	949.152	-2.19849	1.31903	-1.66675
ort000064	8.83644	-7.14452	4.09751	-1.74362	0.0812248	NA			ort000359	799.851	2.02678	1.26955	1.59645	0.110388	0.963386			ort004714	221.306	-2.19195	1.39962	-1.5661	0.117325	0.999867			ort003391	1800.8	-2.15759	1.32522	-1.6281	0.103504	NA			ort008360	50.6789	-3.40875	2.09939	-1.62369	0.104443	NA			ort010652	228.978	-2.53551	1.52363	-1.66412
ort002942	8.83644	-7.14452	4.09751	-1.74362	0.0812248	NA			ort011489	182.103	2.32134	1.45432	1.59617	0.110451	NA			ort010148	598.287	2.02855	1.29574	1.56556	0.117452	0.999867			ort008999	163.026	2.51247	1.5443	1.62692	0.103753	NA			ort005691	218.481	2.37497	1.46412	1.62211	0.10478	NA			ort001219	7585.89	-2.08486	1.25354	-1.66318
ort004138	8.83644	-7.14452	4.09751	-1.74362	0.0812248	NA			ort003426	71.6421	2.81208	1.76302	1.59503	0.110705	NA			ort008905	1739.03	1.9632	1.25455	1.56486	0.117615	0.999867			ort010146	71.9668	2.93912	1.80714	1.62639	0.103866	NA			ort009795	268.581	-2.30329	1.42092	-1.62098	0.105021	NA			ort011240	412.457	-2.33931	1.40655	-1.66315
ort011334	8.83644	-7.14452	4.09751	-1.74362	0.0812248	NA			ort006026	291.216	2.17872	1.367	1.59379	0.110982	NA			ort000168	360.043	-2.0903	1.33685	-1.5636	0.117912	0.999867			ort009018	2409.83	-2.14324	1.31831	-1.62575	0.104004	NA			ort003458	714.689	2.09255	1.2911	1.62075	0.105072	0.999494			ort007852	32.651	-4.50767	2.71077	-1.66287
ort001508	171.64	2.93224	1.68189	1.74342	0.0812609	NA			ort005047	87.2141	-2.68189	1.68326	-1.59327	0.111099	NA			ort006849	133.346	2.333	1.49245	1.5632	0.118006	0.999867			ort009929	387.517	2.2892	1.40813	1.62571	0.104012	NA			ort011440	224.547	-2.36394	1.45869	-1.62059	0.105106	NA			ort002893	12.3736	7.53097	4.52968	1.66258
ort005168	464.302	-2.7312	1.5667	-1.74328	0.0812842	0.765503			ort011557	1169.82	1.98976	1.24931	1.5927	0.111229	0.963386			ort001418	405.785	2.06875	1.32352	1.56307	0.118035	0.999867			ort006563	19.8174	-4.49187	2.76596	-1.62398	0.104379	NA			ort005002	262.905	-2.30855	1.4248	-1.62026	0.105177	NA			ort003770	12.3736	7.53097	4.52968	1.66258
ort010000	61.5122	3.45067	1.98072	1.74213	0.081485	NA			ort007155	574.875	-2.0563	1.29133	-1.59239	0.111297	0.963386			ort001818	124.986	2.35409	1.5075	1.56158	0.118386	0.999867			ort000577	27.183	-3.91815	2.41337	-1.62352	0.104479	NA			ort000333	306.481	-2.26177	1.396	-1.62018	0.105194	NA			ort006919	12.3736	7.53097	4.52968	1.66258
ort006380	78.6594	3.27531	1.88063	1.7416	0.0815783	NA			ort011560	824.294	-2.01489	1.26615	-1.59136	0.11153	0.963386			ort011113	573.971	-2.02679	1.29797	-1.56151	0.118404	0.999867			ort007766	36.7491	-3.51743	2.16663	-1.62346	0.104492	NA			ort002922	23.2682	4.60695	2.84448	1.61961	0.105316	NA			ort011593	34.8147	4.18156	2.51534	1.66243
ort002622	5468.34	2.62643	1.50841	1.74119	0.0816503	0.765503			ort006595	10499.9	-1.92538	1.21122	-1.58962	0.111921	0.963386			ort010797	3354.72	1.93997	1.24261	1.5612	0.118476	0.999867			ort001710	664.748	-2.21125	1.3623	-1.62317	0.104553	NA			ort007995	192.176	2.41936	1.49406	1.61932	0.105379	NA			ort009983	117.984	2.87155	1.72788	1.66189
ort003480	551.6	2.71512	1.55955	1.74097	0.081689	0.765503			ort011238	1141.07	-1.98048	1.24821	-1.58666	0.11259	0.963386			ort009882	2785.57	1.94289	1.24479	1.56081	0.118568	0.999867			ort005562	9.48707	-6.93446	4.2726	-1.62301	0.104588	NA			ort006818	1287.75	2.02781	1.25303	1.61832	0.105594	0.999494			ort006910	375.397	-2.3606	1.42073	-1.66154
ort008502	350.811	2.76764	1.59114	1.73941	0.0819626	0.765503			ort004504	17.5263	-4.92121	3.10219	-1.58636	0.112657	NA			ort008262	422.303	2.05777	1.31893	1.56018	0.118717	0.999867			ort005579	9.48707	-6.93446	4.2726	-1.62301	0.104588	NA			ort005266	146.938	2.54034	1.57001	1.61804	0.105653	NA			ort003558	120.629	-2.87894	1.73284	-1.6614
ort010646	61.3961	-3.36491	1.93683	-1.73733	0.0823289	NA			ort008437	17.5263	-4.92121	3.10219	-1.58636	0.112657	NA			ort005263	334.618	2.08585	1.33972	1.55693	0.119487	0.999867			ort010360	9.48707	-6.93446	4.2726	-1.62301	0.104588	NA			ort007604	252.072	2.31459	1.43077	1.61772	0.105723	NA			ort001862	68.0507	3.32293	2.00033	1.66119
ort004835	1886.59	-2.63614	1.51749	-1.73717	0.0823569	0.765503			ort011196	415.598	-2.09221	1.31934	-1.5858	0.112786	NA			ort000353	1319.98	1.95726	1.25803	1.55581	0.119754	0.999867			ort010505	9.48707	-6.93446	4.2726	-1.62301	0.104588	NA			ort001843	367.63	-2.2078	1.36511	-1.61731	0.105812	NA			ort001288	553.108	2.2645	1.36377	1.66048
ort009073	127.66	-2.99145	1.72231	-1.73688	0.0824082	NA			ort000428	9.51886	6.85665	4.3255	1.58517	0.112928	NA			ort009314	283.025	2.11231	1.35813	1.55531	0.119873	0.999867			ort006610	153.215	-2.51838	1.55177	-1.62291	0.10461	NA			ort006647	84.7742	2.88803	1.7858	1.61722	0.10583	NA			ort005948	286.018	2.43136	1.46541	1.65917
ort001853	302.425	2.78618	1.60434	1.73666	0.0824475	0.765503			ort000866	9.51886	6.85665	4.3255	1.58517	0.112928	NA			ort005781	20.8517	-4.00483	2.57692	-1.55412	0.120156	0.999867			ort011566	82.1781	2.83846	1.74946	1.62248	0.104701	NA			ort003324	324.054	-2.23746	1.38451	-1.61607	0.106079	NA			ort007192	86.7708	3.09486	1.86562	1.65889
ort000848	36.8385	3.97044	2.28664	1.73637	0.0824989	NA			ort000944	9.51886	6.85665	4.3255	1.58517	0.112928	NA			ort011316	402.117	2.05251	1.32078	1.55402	0.12018	0.999867			ort005002	240.39	-2.37774	1.46553	-1.62244	0.104709	NA			ort007453	12797.3	-1.95056	1.2083	-1.61431	0.106461	0.999494			ort006486	132.147	-2.80936	1.69429	-1.65813
ort002603	36.8385	3.97044	2.28664	1.73637	0.0824989	NA			ort001612	9.51886	6.85665	4.3255	1.58517	0.112928	NA			ort003229	73.7782	-2.60856	1.67972	-1.55297	0.120431	0.999867			ort001669	242.59	-2.37482	1.46399	-1.62216	0.10477	NA			ort004010	339.736	2.21883	1.37479	1.61394	0.106542	NA			ort007006	666.719	2.22521	1.34267	1.6573
ort000878	86402.8	-2.60554	1.50151	-1.73529	0.0826903	0.765503			ort006919	9.51886	6.85665	4.3255	1.58517	0.112928	NA			ort009292	244.392	-2.13822	1.3786	-1.55102	0.120898	0.999867			ort000024	64.0901	-2.9894	1.84329	-1.62178	0.10485	NA			ort004871	12.382	-6.94799	4.30532	-1.61381	0.106568	NA			ort010272	69.1029	-3.34613	2.01992	-1.65656
ort003961	758.238	-2.67147	1.54016	-1.73454	0.0828217	0.765503			ort011648	9.51886	6.85665	4.3255	1.58517	0.112928	NA			ort007037	54.1616	-2.81844	1.81746	-1.55076	0.120959	0.999867			ort002557	103.448	-2.68592	1.65747	-1.62049	0.105126	NA			ort005061	12.382	-6.94799	4.30532	-1.61381	0.106568	NA			ort005913	15.6381	-6.95026	4.19707	-1.65598
ort001893	43.0069	3.76563	2.17297	1.73294	0.0831068	NA			ort001385	818.936	-2.00315	1.26397	-1.58481	0.11301	0.963386			ort010618	106.984	10.4734	6.76732	1.54765	0.121706	0.999867			ort003018	196.21	-2.42621	1.49861	-1.61898	0.105453	NA			ort005524	12.382	-6.94799	4.30532	-1.61381	0.106568	NA			ort010199	15.6381	-6.95026	4.19707	-1.65598
ort001847	466.057	-2.70985	1.56383	-1.73284	0.0831248	0.765503			ort002342	570.205	2.03859	1.28766	1.58318	0.113381	0.963386			ort001946	67.4828	2.62638	1.69926	1.5456	0.122201	0.999867			ort009089	4686.54	-2.11558	1.30686	-1.61883	0.105485	0.785752			ort011105	1968.2	-1.99271	1.23485	-1.61373	0.106587	0.999494			ort003017	82.4391	-3.16889	1.91388	-1.65574
ort002612	583.575	-2.6873	1.55118	-1.73243	0.0831975	0.765503			ort002311	465.081	-2.06737	1.30637	-1.58253	0.113528	NA			ort008040	8.99665	-6.32191	4.09037	-1.54556	0.122211	0.999867			ort001194	71.2844	-2.8979	1.79298	-1.61625	0.106041	NA			ort003493	680.055	-2.08455	1.29229	-1.61308	0.106728	NA			ort006199	143.301	-2.74861	1.66164	-1.65416
ort000215	149.125	-2.92837	1.69079	-1.73196	0.083281	NA			ort008501	680.212	2.01603	1.27415	1.58225	0.113593	0.963386			ort009832	8.99665	-6.32191	4.09037	-1.54556	0.122211	0.999867			ort004235	650.417	2.20057	1.3616	1.61616	0.106059	NA			ort007934	148.487	2.52245	1.56404	1.61278	0.106791	NA			ort010821	62.5113	3.38669	2.04807	1.6536
ort003829	227.271	2.83229	1.63594	1.73129	0.0834	NA			ort000225	432.466	-2.07675	1.31329	-1.58134	0.113801	NA			ort007766	29.0264	-3.44225	2.22735	-1.54544	0.122239	0.999867			ort009755	200.018	-2.41284	1.49349	-1.61557	0.106187	NA			ort003316	3019.06	-1.97185	1.22319	-1.61206	0.106949	0.999494			ort003095	52.1201	3.58839	2.1705	1.65325
ort011371	722.284	2.67242	1.54372	1.73115	0.0834246	0.765503			ort011468	1717.61	1.9476	1.23167	1.58127	0.113817	0.963386			ort005198	424.808	-2.02577	1.31321	-1.54261	0.122926	0.999867			ort003079	1114.65	-2.15409	1.33386	-1.61493	0.106326	NA			ort001546	174.247	2.44361	1.5162	1.61167	0.107034	NA			ort003970	422.116	-2.31082	1.39823	-1.65267
ort006175	179.903	2.89229	1.67075	1.73113	0.0834279	NA			ort001343	33.4752	3.52304	2.22899	1.58056	0.11398	NA			ort003463	103.928	10.4316	6.76734	1.54147	0.123203	0.999867			ort010976	807.856	-2.1718	1.34685	-1.6125	0.106852	NA			ort001970	320.258	2.22579	1.38256	1.6099	0.107419	NA			ort001501	393.341	-2.32857	1.40903	-1.6526
ort004055	38.7981	-3.73168	2.15682	-1.73018	0.083599	NA			ort002953	71.02	-2.79227	1.76728	-1.57998	0.114112	NA			ort010752	63.3565	-2.67863	1.73794	-1.54126	0.123253	0.999867			ort006486	107.256	-2.64803	1.64218	-1.6125	0.106852	NA			ort005896	1033.94	-2.02543	1.26001	-1.60747	0.107951	0.999494			ort007626	82.0754	-3.1618	1.91404	-1.6519
ort003865	1677.2	-2.62526	1.51765	-1.72982	0.0836626	0.765503			ort001303	135.504	10.6877	6.76707	1.57936	0.114253	NA			ort000950	7562.78	1.89258	1.22855	1.5405	0.123438	0.999867			ort002809	381.615	2.26248	1.4036	1.61191	0.106981	NA			ort002005	571.058	2.09642	1.30503	1.60642	0.108182	NA			ort001421	246.799	2.46603	1.49346	1.65123
ort003762	1273	-2.63475	1.52324	-1.7297	0.0836843	0.765503			ort007379	340.651	-2.11657	1.3404	-1.57906	0.114322	NA			ort001847	296.901	-2.07796	1.34889	-1.54049	0.12344	0.999867			ort003324	298.023	-2.30445	1.43009	-1.6114	0.107093	NA			ort000110	11.4481	7.08428	4.41094	1.60607	0.108259	NA			ort010217	92.6738	3.01808	1.82859	1.6505
ort010003	3421.35	2.60984	1.50902	1.7295	0.0837202	0.765503			ort003703	377.958	-2.0954	1.3273	-1.57869	0.114406	NA			ort009358	3144.72	1.90344	1.23563	1.54046	0.123449	0.999867			ort011168	1256.33	-2.14006	1.32814	-1.61132	0.10711	NA			ort006919	11.4481	7.08428	4.41094	1.60607	0.108259	NA			ort007491	102.969	-2.96551	1.79676	-1.65048
ort000982	88.6197	3.17455	1.83582	1.72923	0.0837687	NA			ort010419	100.964	2.54904	1.61485	1.5785	0.114451	NA			ort001233	118.526	-2.33876	1.51844	-1.54024	0.123502	0.999867			ort007003	80.6791	-2.80176	1.73969	-1.61049	0.10729	NA			ort000279	201.929	-2.37114	1.47656	-1.60585	0.108307	NA			ort001743	158.053	-2.68183	1.62516	-1.65019
ort009076	528.342	2.69464	1.55886	1.7286	0.0838807	0.765503			ort007631	239.399	2.19702	1.39226	1.57802	0.114561	NA			ort010639	28.1299	3.38743	2.2007	1.53925	0.123743	0.999867			ort004454	41.0824	3.39884	2.11045	1.61048	0.107293	NA			ort011467	350.12	2.19306	1.36608	1.60537	0.108413	NA			ort009932	474.25	-2.27695	1.38035	-1.64954
ort011621	1191.61	2.63789	1.52603	1.72859	0.0838826	0.765503			ort005391	243.651	2.19172	1.38909	1.57781	0.11461	NA			ort008122	2258.46	1.90797	1.23981	1.53892	0.123824	0.999867			ort002964	162.439	-2.46725	1.53254	-1.60991	0.107418	NA			ort011179	331.732	2.20399	1.37387	1.60422	0.108666	NA			ort009864	323.215	2.37067	1.43729	1.64941
ort004409	131.285	-2.96133	1.71425	-1.72748	0.0840811	NA			ort002379	256.768	-2.17788	1.38134	-1.57665	0.114877	NA			ort006384	24.7346	-3.64227	2.36907	-1.53743	0.124188	0.999867			ort003446	36.1561	-3.4919	2.1691	-1.60984	0.107434	NA			ort003935	4750.33	1.94468	1.21223	1.60422	0.108666	0.999494			ort005369	130.693	-2.79109	1.69335	-1.64827
ort005049	36286.1	-2.58963	1.49987	-1.72658	0.0842436	0.766976			ort011022	439.269	2.06286	1.30872	1.57624	0.114971	NA			ort010568	12.6357	4.90197	3.18879	1.53725	0.124232	0.999867			ort008150	506.052	-2.21253	1.37513	-1.60896	0.107626	NA			ort008961	520.49	-2.10576	1.31373	-1.60288	0.10896	NA			ort010279	330.169	2.36015	1.43256	1.64751
ort010009	63.2084	-3.31492	1.92152	-1.72516	0.0844995	NA			ort007105	204.258	2.23834	1.42101	1.57518	0.115215	NA			ort011100	372.145	2.02997	1.32111	1.53656	0.124401	0.999867			ort010076	23.2037	-4.11637	2.55875	-1.60874	0.107673	NA			ort003592	91.2431	-2.80117	1.74817	-1.60235	0.109079	NA			ort001454	632.471	-2.21552	1.34522	-1.64696
ort002270	27015.3	-2.5865	1.49969	-1.72469	0.084583	0.767309			ort008431	84.3998	2.64858	1.68167	1.57497	0.115263	NA			ort007797	1094.78	-1.93127	1.25713	-1.53625	0.124477	0.999867			ort007217	47.3297	-3.20239	1.9926	-1.60714	0.108023	NA			ort002879	361.209	-2.17682	1.35987	-1.60075	0.109432	NA			ort006628	68272.2	-2.03798	1.23796	-1.64624
ort010207	670.163	2.66436	1.54531	1.72416	0.0846796	0.767309			ort009732	132.704	10.6575	6.76709	1.57491	0.115278	NA			ort008102	2624.31	1.89883	1.23633	1.53586	0.124573	0.999867			ort001321	99.4686	-2.67182	1.66314	-1.60649	0.108166	NA			ort000323	537.605	-2.09544	1.30919	-1.60056	0.109474	NA			ort008611	40.3541	3.89253	2.36636	1.64495
ort010333	78.5001	-3.17838	1.84485	-1.72284	0.0849167	NA			ort006214	1383.35	-1.94626	1.23612	-1.57449	0.115375	0.963386			ort008510	176.785	2.18343	1.42176	1.53572	0.124607	0.999867			ort009996	2896.76	2.10005	1.30738	1.60631	0.108207	0.793831			ort002100	379.436	2.16332	1.35161	1.60055	0.109478	NA			ort001438	102.242	-2.95397	1.79658	-1.64422
ort001553	60.1541	3.41548	1.98295	1.72243	0.0849917	NA			ort007299	1060.55	-1.96132	1.24638	-1.57362	0.115576	0.963386			ort007665	1421.96	1.917	1.2484	1.53557	0.124644	0.999867			ort004497	776.261	2.16276	1.34684	1.6058	0.108317	NA			ort011177	3256.07	-1.94708	1.21666	-1.60035	0.109521	0.999494			ort004475	61.8239	3.3692	2.04936	1.64403
ort005590	60.1541	3.41548	1.98295	1.72243	0.0849917	NA			ort006279	36.1614	3.40193	2.16268	1.57301	0.115716	NA			ort010880	156.326	-2.22725	1.45047	-1.53554	0.124651	0.999867			ort006300	2691.18	-2.09741	1.30742	-1.60424	0.108661	NA			ort003214	574.069	2.08328	1.30178	1.60034	0.109524	NA			ort001843	219.926	-2.5021	1.52333	-1.64252
ort007555	146.627	2.93686	1.70528	1.72222	0.0850304	NA			ort004014	372.234	2.08523	1.32572	1.5729	0.115741	NA			ort010792	269.317	-2.08557	1.35883	-1.53483	0.124826	0.999867			ort001220	55.117	-3.05959	1.9072	-1.60423	0.108663	NA			ort008134	62.9486	-3.10809	1.94221	-1.60029	0.109534	NA			ort008022	326.368	2.35187	1.43217	1.64217
ort007632	35.5132	-3.80147	2.20752	-1.72206	0.0850594	NA			ort005265	467.654	-2.044	1.30119	-1.57087	0.116214	NA			ort004235	429.041	2.00716	1.30776	1.53481	0.124831	0.999867			ort011040	466.694	-2.20748	1.37848	-1.60139	0.109291	NA			ort004816	30.7272	3.97734	2.48865	1.59819	0.110001	NA			ort005514	89.6328	-3.05544	1.86068	-1.64211
ort000097	48.4963	3.60545	2.09372	1.72203	0.0850635	NA			ort006968	438.596	2.05072	1.30634	1.56983	0.116455	NA			ort007282	1004.52	1.93225	1.25902	1.53473	0.12485	0.999867			ort007629	65.1047	-2.92189	1.82468	-1.60132	0.109307	NA			ort004290	816.319	2.03065	1.27078	1.59795	0.110053	0.999494			ort005177	477.08	-2.25803	1.37579	-1.64126
ort003724	434.225	11.6459	6.76656	1.7211	0.085233	0.769285			ort003706	128.785	10.6143	6.76711	1.56851	0.116762	NA			ort004363	836.105	-1.9448	1.26724	-1.53467	0.124864	0.999867			ort003613	10.5407	6.59449	4.11829	1.60127	0.109317	NA			ort006683	3537.8	-1.93815	1.21368	-1.59693	0.110282	0.999494			ort007995	236.408	2.45957	1.49868	1.64116
ort000866	11.8826	6.45487	3.75372	1.71959	0.0855063	NA			ort006623	7985.08	-1.88885	1.20449	-1.56817	0.116842	0.963386			ort000568	352.476	-2.03643	1.32741	-1.53413	0.124997	0.999867			ort008717	10.5407	6.59449	4.11829	1.60127	0.109317	NA			ort004224	587.092	2.0718	1.2978	1.59639	0.110402	NA			ort008695	3314.19	2.06073	1.25574	1.64105
ort009358	4303.86	2.5869	1.50463	1.7193	0.0855605	0.769285			ort006143	128.225	10.608	6.76711	1.56758	0.116979	NA			ort008088	79.1065	2.50347	1.63278	1.53325	0.125214	0.999867			ort006474	356.078	-2.24644	1.40399	-1.60004	0.10959	NA			ort008519	1916.33	1.95881	1.22768	1.59554	0.110592	0.999494			ort009383	419.894	-2.28488	1.39321	-1.64002
ort011553	1887.2	-2.60005	1.51292	-1.71857	0.0856935	0.769285			ort011236	124.521	-2.42057	1.54449	-1.56723	0.117061	NA			ort011650	55881.5	-1.87132	1.22119	-1.53237	0.12543	0.999867			ort003268	2324.73	2.09175	1.30801	1.59918	0.109781	NA			ort003022	419.607	-2.13178	1.33617	-1.59544	0.110615	NA			ort011227	792.067	-2.16567	1.32094	-1.63949
ort007995	82.1118	3.19174	1.85737	1.71842	0.0857197	NA			ort000006	504.397	2.02361	1.29164	1.56669	0.117187	NA			ort003339	891.548	1.93484	1.26277	1.53222	0.125468	0.999867			ort000751	197.321	10.8206	6.76677	1.59908	0.109803	NA			ort002813	40.8253	3.55059	2.22806	1.59358	0.11103	NA			ort000340	11107.7	-2.03352	1.24043	-1.63937
ort006726	76.6224	3.23349	1.8818	1.71829	0.0857434	NA			ort001192	738.859	-1.97896	1.26317	-1.56666	0.117194	0.963386			ort002687	101.334	2.3771	1.55163	1.53201	0.125521	0.999867			ort010304	495.721	-2.19288	1.37211	-1.59818	0.110003	NA			ort006849	387.726	2.14394	1.34537	1.59358	0.111031	NA			ort001332	2364.42	-2.07159	1.26378	-1.6392
ort006744	146.916	-2.90399	1.69005	-1.71828	0.0857449	NA			ort008502	338.101	2.09042	1.3349	1.56597	0.117356	NA			ort009993	82.9811	2.47138	1.61473	1.53052	0.125887	0.999867			ort004312	62.3113	-2.9436	1.84282	-1.59734	0.11019	NA			ort004714	324.314	-2.18899	1.37368	-1.59353	0.111041	NA			ort003430	22.7249	4.9185	3.00263	1.63806
ort009158	16774.5	-2.57529	1.4988	-1.71823	0.0857544	0.769285			ort009350	388.571	2.06362	1.31789	1.56585	0.117383	NA			ort006949	17896	-1.87004	1.22194	-1.53038	0.125922	0.999867			ort005457	251.471	-2.31158	1.44727	-1.5972	0.110221	NA			ort000353	3441.31	1.93225	1.2126	1.59347	0.111054	0.999494			ort003125	48.533	-3.71369	2.26724	-1.63797
ort000759	216.407	-2.80068	1.63034	-1.71785	0.0858238	NA			ort010945	430.537	2.04586	1.30664	1.56574	0.117409	NA			ort004204	695.938	-1.95041	1.2746	-1.53022	0.125962	0.999867			ort003295	228.874	-2.33098	1.46108	-1.59538	0.110628	NA			ort004375	239.456	-2.27996	1.43107	-1.59319	0.111119	NA			ort010641	771.111	2.16314	1.32086	1.63768
ort007693	21371.4	2.57166	1.4981	1.71662	0.0860495	0.769285			ort003625	1458.64	1.92497	1.23031	1.56463	0.11767	0.963386			ort000178	190.243	-2.15686	1.40997	-1.52973	0.126085	0.999867			ort006303	2819.97	-2.07763	1.30276	-1.59479	0.110759	0.793831			ort007706	748.505	2.03023	1.27487	1.5925	0.111273	0.999494			ort008817	91.299	2.99383	1.82843	1.63738
ort008694	269.885	2.76512	1.61123	1.71616	0.0861333	0.769285			ort009250	1107.58	1.93947	1.24031	1.56369	0.11789	0.963386			ort008695	1660.36	1.9	1.24231	1.52941	0.126163	0.999867			ort004588	76.104	2.81185	1.76479	1.59331	0.111091	NA			ort006935	127.68	-2.5579	1.60671	-1.59202	0.111381	NA			ort011594	908.904	-2.14364	1.3092	-1.63737
ort005965	114.03	3.01953	1.75979	1.71585	0.0861891	NA			ort004253	26.2363	-3.86971	2.47513	-1.56344	0.117949	NA			ort007535	239.076	-2.09919	1.37291	-1.52901	0.126263	0.999867			ort003135	336.975	2.24504	1.40909	1.59325	0.111104	NA			ort007442	322.638	2.18259	1.37218	1.5906	0.1117	NA			ort008308	114.547	2.82297	1.72613	1.63543
ort009681	274.968	-2.74704	1.60181	-1.71495	0.0863537	0.769285			ort008428	123.793	2.40638	1.54033	1.56224	0.11823	NA			ort004970	30.3728	3.26458	2.13521	1.52893	0.126283	0.999867			ort005293	200.841	2.36696	1.48584	1.59301	0.111157	NA			ort007618	366.699	2.15043	1.35205	1.5905	0.111723	NA			ort009871	58.7106	3.39658	2.07736	1.63505
ort007711	181.658	2.85262	1.6643	1.71401	0.0865265	NA			ort001030	184.448	2.24419	1.43685	1.56189	0.118315	NA			ort007310	405.591	2.0033	1.31029	1.5289	0.12629	0.999867			ort005694	1931.33	-2.08236	1.30829	-1.59167	0.111459	NA			ort000173	109.444	2.63967	1.66005	1.59011	0.11181	NA			ort009962	913.876	-2.13167	1.30635	-1.63177
ort002447	124.33	2.97936	1.7383	1.71395	0.0865384	NA			ort007019	1595.59	-1.91579	1.22665	-1.5618	0.118334	0.963386			ort002842	145.991	-10.3417	6.7669	-1.52828	0.126442	0.999867			ort010604	109.285	-2.58624	1.62579	-1.59075	0.111665	NA			ort010199	24.4785	-4.42294	2.78371	-1.58886	0.112091	NA			ort004971	104.747	-2.90019	1.77801	-1.63115
ort010313	264.056	2.76458	1.61307	1.71386	0.0865544	0.769285			ort007778	268.94	2.13032	1.36545	1.56016	0.118722	NA			ort007569	86.8556	2.44259	1.59826	1.52828	0.126444	0.999867			ort005883	229.295	-2.31503	1.45759	-1.58826	0.112227	NA			ort003351	11.9234	-6.89354	4.3398	-1.58844	0.112186	NA			ort010420	3440.73	2.03959	1.25064	1.63084
ort004588	70.454	3.26766	1.91073	1.71016	0.0872355	NA			ort002903	66.4417	-2.78881	1.78888	-1.55897	0.119004	NA			ort008984	3921.11	1.87508	1.22817	1.52673	0.126829	0.999867			ort007737	14076	2.04442	1.28781	1.58752	0.112395	0.793831			ort008092	11.9234	-6.89354	4.3398	-1.58844	0.112186	NA			ort005561	33.4399	4.12016	2.52824	1.62966
ort010587	107.861	3.02765	1.7719	1.70871	0.0875054	NA			ort006843	80.5937	2.63699	1.69262	1.55794	0.119249	NA			ort003632	979.445	1.91863	1.25689	1.52649	0.126888	0.999867			ort001357	900.17	-2.11241	1.3309	-1.5872	0.112467	NA			ort001659	1634.46	-1.95423	1.23028	-1.58844	0.112186	0.999494			ort005461	3427.59	2.03661	1.25004	1.62924
ort000746	773.243	-2.61816	1.53284	-1.70804	0.0876287	0.769285			ort000195	4560.1	-1.87461	1.20465	-1.55615	0.119672	0.963386			ort003174	51.1708	2.76991	1.81479	1.5263	0.126936	0.999867			ort000700	185.516	10.7316	6.76679	1.58592	0.112757	NA			ort002548	799.221	2.01326	1.26776	1.58805	0.112276	0.999494			ort002408	3184.87	-2.03846	1.25166	-1.6286
ort011535	302.879	2.72616	1.5967	1.70738	0.0877523	0.769285			ort011481	952.694	1.93643	1.24438	1.55614	0.119675	0.963386			ort009330	2545.23	-1.88095	1.23315	-1.52532	0.127178	0.999867			ort011290	685.29	-2.13156	1.34436	-1.58556	0.112839	NA			ort011290	757.091	-2.01795	1.27169	-1.58682	0.112553	0.999494			ort001405	919.936	2.12031	1.30275	1.62756
ort007069	59.1356	3.38852	1.98473	1.70729	0.0877679	NA			ort003554	112.012	-2.44706	1.57303	-1.55564	0.119795	NA			ort010906	46.6848	2.83882	1.86137	1.52512	0.127228	0.999867			ort007451	615.468	-2.13961	1.35049	-1.58432	0.113121	NA			ort008209	60.935	3.08593	1.94508	1.58653	0.112618	NA			ort007719	205.499	-2.49648	1.53397	-1.62746
ort006600	292.579	2.73138	1.60011	1.707	0.0878224	0.769285			ort004110	252.936	2.13597	1.37343	1.55521	0.119896	NA			ort002642	10241.3	-1.86312	1.22164	-1.5251	0.127234	0.999867			ort003516	595.664	-2.14173	1.35238	-1.58367	0.113269	NA			ort002860	2679.73	1.92507	1.21425	1.5854	0.112876	0.999494			ort002298	357.253	-2.29444	1.41207	-1.62487
ort001724	261.68	2.7496	1.61193	1.70579	0.0880479	0.769285			ort011033	242.304	2.14632	1.38053	1.55471	0.120016	NA			ort011206	199.83	2.12758	1.39569	1.5244	0.12741	0.999867			ort007463	148.893	-2.43847	1.5399	-1.58353	0.113301	NA			ort005929	1155.55	1.97139	1.24369	1.58511	0.112941	0.999494			ort004150	62.875	3.29358	2.02722	1.62467
ort008163	222.92	-2.76906	1.6234	-1.70572	0.0880608	NA			ort002736	47.4552	-3.07326	1.97694	-1.55455	0.120053	NA			ort008536	220.834	2.10242	1.37961	1.52393	0.127527	0.999867			ort005158	155.495	-2.42183	1.52976	-1.58314	0.113389	NA			ort006524	590.475	2.04608	1.29161	1.58413	0.113165	NA			ort005090	60.4491	3.33358	2.05205	1.62451
ort001564	1236.91	-2.58647	1.51788	-1.704	0.088381	0.769285			ort009859	206.172	-2.195	1.41235	-1.55414	0.120151	NA			ort011177	1445.99	-1.89573	1.24406	-1.52383	0.127551	0.999867			ort008675	126.91	2.50807	1.5849	1.58248	0.113539	NA			ort001290	30.182	3.94986	2.49384	1.58385	0.113228	NA			ort005848	66.5571	-3.28654	2.02332	-1.62433
ort005290	822.289	-2.60452	1.52935	-1.70303	0.0885631	0.769285			ort001509	93.9113	2.53233	1.62982	1.55375	0.120245	NA			ort003288	133.962	2.24705	1.47468	1.52375	0.127571	0.999867			ort010275	34.9703	-3.43943	2.17439	-1.58179	0.113697	NA			ort005612	37.0958	3.64174	2.29992	1.58342	0.113325	NA			ort008449	2112.37	2.04652	1.26023	1.62393
ort007313	966.711	2.59887	1.52605	1.703	0.0885679	0.769285			ort009205	920.489	-1.9339	1.2453	-1.55296	0.120433	0.963386			ort006138	134.053	-2.25412	1.47988	-1.52318	0.127713	0.999867			ort006674	105.899	-2.57937	1.63079	-1.58167	0.113724	NA			ort004094	84.1425	2.80269	1.77035	1.58313	0.113393	NA			ort006474	345.735	-2.29776	1.41649	-1.62215
ort006540	726.632	-2.61129	1.53388	-1.70241	0.0886787	0.769285			ort001357	786.563	-1.94258	1.25302	-1.55031	0.121067	0.963386			ort011413	95.3689	10.3076	6.76742	1.52313	0.127727	0.999867			ort009215	9845.72	-2.03395	1.28642	-1.58109	0.113857	0.793831			ort004282	525.136	-2.06314	1.30355	-1.58271	0.113487	NA			ort009148	254.574	-10.9747	6.76669	-1.62187
ort002869	457.502	-2.65169	1.55761	-1.70241	0.0886791	0.769285			ort008299	91.2251	2.5387	1.6387	1.54922	0.12133	NA			ort003501	80.5195	-2.48167	1.63134	-1.52124	0.128199	0.999867			ort007320	151.47	2.42932	1.53834	1.57919	0.114294	NA			ort009923	161.968	2.40787	1.52226	1.58177	0.113701	NA			ort011542	172.202	2.55149	1.57406	1.62096
ort004426	6840.75	2.54742	1.49749	1.70113	0.0889191	0.769285			ort008394	3037.06	1.87021	1.20729	1.5491	0.121357	0.963386			ort010596	110.103	2.31706	1.5233	1.52108	0.12824	0.999867			ort003894	8.89413	-6.84135	4.33227	-1.57916	0.114299	NA			ort008270	177.935	-2.36693	1.49731	-1.58078	0.113928	NA			ort000549	452.873	-2.22628	1.3736	-1.62076
ort008531	2721.65	2.55964	1.50472	1.70108	0.088928	0.769285			ort010173	972.544	-1.92022	1.24059	-1.54782	0.121665	0.963386			ort010183	20238.9	-1.85309	1.21828	-1.52106	0.128244	0.999867			ort005404	8.89413	-6.84135	4.33227	-1.57916	0.114299	NA			ort010527	17.3582	5.20357	3.29382	1.5798	0.114152	NA			ort008536	1032.62	2.09352	1.2919	1.6205
ort006642	75389.8	-2.53835	1.49303	-1.70013	0.0891071	0.769285			ort000666	2100.6	-1.8788	1.21401	-1.5476	0.121718	0.963386			ort004297	285.455	-2.04653	1.34584	-1.52064	0.128351	0.999867			ort009462	8.89413	-6.84135	4.33227	-1.57916	0.114299	NA			ort009215	9108.91	-1.88809	1.19534	-1.57955	0.11421	0.999494			ort004533	174.906	-2.55498	1.57698	-1.62017
ort003835	416.235	2.6647	1.56746	1.70001	0.0891296	0.769285			ort011482	2758.07	1.86716	1.20774	1.54599	0.122108	0.963386			ort009044	12671.5	1.85188	1.21879	1.51945	0.12865	0.999867			ort003991	1203.35	2.07625	1.31596	1.57775	0.114623	NA			ort001608	574.561	-2.04133	1.29265	-1.57918	0.114294	NA			ort003602	136.784	2.67238	1.6496	1.62002
ort005628	1017.59	2.5885	1.52347	1.69909	0.0893027	0.769285			ort006653	9.82261	-6.57533	4.25436	-1.54555	0.122213	NA			ort003087	93.5349	10.2796	6.76744	1.51898	0.128767	0.999867			ort005780	31.464	3.61659	2.29308	1.57718	0.114755	NA			ort008882	727.132	2.00635	1.27091	1.57867	0.114412	0.999494			ort002348	91.6627	2.9432	1.81703	1.61979
ort000291	11.5431	6.41305	3.77588	1.69843	0.0894275	NA			ort002772	204.386	-2.17969	1.41045	-1.54538	0.122254	NA			ort008495	185.352	2.13614	1.40637	1.5189	0.128788	0.999867			ort002955	18.6315	-4.39877	2.7894	-1.57696	0.114805	NA			ort005458	930.622	-1.97592	1.25295	-1.57702	0.114792	0.999494			ort006769	417.498	2.23616	1.38141	1.61875
ort002893	11.5431	6.41305	3.77588	1.69843	0.0894275	NA			ort008536	265.02	2.10426	1.36175	1.54526	0.122283	NA			ort005277	9357.82	-1.85221	1.21964	-1.51865	0.12885	0.999867			ort010968	138.905	-2.44884	1.55318	-1.57666	0.114873	NA			ort008283	339.762	2.14009	1.35742	1.57659	0.114891	NA			ort007436	952.554	-2.10059	1.2977	-1.6187
ort006414	85.5642	3.11821	1.83657	1.69784	0.0895375	NA			ort000222	185.733	-2.20855	1.43016	-1.54426	0.122525	NA			ort004240	101.156	-2.3585	1.55376	-1.51792	0.129033	0.999867			ort008287	273.427	2.25224	1.42852	1.57663	0.114881	NA			ort010598	103.075	2.64397	1.67702	1.57659	0.114891	NA			ort000649	826.903	2.11267	1.30629	1.61731
ort002094	785.446	2.60024	1.53203	1.69726	0.0896479	0.770035			ort004585	114.786	10.4483	6.76719	1.54396	0.122597	NA			ort009997	115.609	2.28975	1.50872	1.51768	0.129096	0.999867			ort005935	3708.44	2.03465	1.29138	1.57557	0.115126	0.793831			ort002706	51.9272	3.21626	2.0401	1.57652	0.114905	NA			ort001997	1258.77	-2.06603	1.27905	-1.61529
ort006024	63.946	3.30084	1.94555	1.69662	0.0897694	NA			ort003268	1852.41	-1.87683	1.21569	-1.54384	0.122627	0.963386			ort009755	86.2405	-2.4362	1.60528	-1.51761	0.129112	0.999867			ort007692	852.497	2.09304	1.32898	1.57492	0.115274	NA			ort010268	422.061	2.09055	1.32613	1.57643	0.114926	NA			ort011038	452.269	2.21013	1.36849	1.61501
ort010268	188.223	2.80484	1.65363	1.69617	0.0898534	NA			ort004038	8.95892	6.76919	4.38559	1.54351	0.122708	NA			ort005593	253.376	-2.06376	1.36008	-1.51738	0.129172	0.999867			ort004545	318.159	2.21667	1.40776	1.57461	0.115347	NA			ort009428	1700.77	-1.92589	1.22287	-1.5749	0.115279	0.999494			ort006349	381.029	2.24996	1.39344	1.61468
ort009381	519.29	2.63133	1.55177	1.6957	0.0899428	0.770035			ort008732	8.95892	6.76919	4.38559	1.54351	0.122708	NA			ort001592	7.33607	6.60759	4.35618	1.51683	0.129309	0.999867			ort007875	1151.09	-2.07045	1.31544	-1.57396	0.115496	NA			ort001387	2012.73	1.91678	1.21713	1.57483	0.115296	0.999494			ort001211	428.747	-2.22341	1.37807	-1.61343
ort010642	2545.18	-2.54906	1.50348	-1.69545	0.089991	0.770035			ort009648	114.226	10.4412	6.76719	1.54292	0.12285	NA			ort002893	7.33607	6.60759	4.35618	1.51683	0.129309	0.999867			ort010148	193.502	2.33439	1.48366	1.5734	0.115626	NA			ort000816	950.662	-1.968	1.25032	-1.57401	0.115486	0.999494			ort010564	1377.17	2.05141	1.27233	1.61233
ort000577	18.3519	-4.70191	2.77728	-1.69299	0.0904573	NA			ort008893	476.188	1.98573	1.28746	1.54236	0.122986	NA			ort007083	7.33607	6.60759	4.35618	1.51683	0.129309	0.999867			ort011487	466.705	2.14675	1.36665	1.57081	0.116226	NA			ort002013	93.0638	2.704	1.71874	1.57325	0.115662	NA			ort009678	1670.92	-2.03037	1.26263	-1.60805
ort003017	116.672	-2.92434	1.72924	-1.69112	0.0908147	NA			ort010394	245.492	-2.11992	1.37475	-1.54204	0.123064	NA			ort011648	7.33607	6.60759	4.35618	1.51683	0.129309	0.999867			ort009476	172.927	-2.35656	1.50077	-1.57024	0.11636	NA			ort005992	10.9029	7.01389	4.45832	1.57321	0.11567	NA			ort003608	1005.98	-2.07308	1.28931	-1.60789
ort005092	423.973	-2.63655	1.55958	-1.69055	0.0909228	0.771897			ort005799	1197.07	-1.89505	1.22913	-1.54178	0.123127	0.963386			ort011549	598.307	1.93683	1.27708	1.51661	0.129366	0.999867			ort007076	5222.96	-2.01864	1.28569	-1.57008	0.116396	0.793831			ort008717	10.9029	7.01389	4.45832	1.57321	0.11567	NA			ort000730	1804.25	-2.02391	1.25925	-1.60723
ort006597	260.695	-2.70666	1.6013	-1.69029	0.0909729	0.771897			ort000426	65.1022	-2.75512	1.78904	-1.54	0.12356	NA			ort011663	137.812	-10.2586	6.76692	-1.51599	0.129522	0.999867			ort009982	325.008	-2.19717	1.40065	-1.56868	0.116723	NA			ort009867	4509.5	-1.88649	1.19948	-1.57275	0.115776	0.999494			ort005889	41.6631	-3.82288	2.3788	-1.60706
ort000542	34.8014	3.88298	2.30069	1.68775	0.0914596	NA			ort003175	290.422	2.07168	1.34546	1.53976	0.12362	NA			ort010072	635.219	1.92945	1.27314	1.51551	0.129643	0.999867			ort005785	420.471	-2.15363	1.37341	-1.5681	0.116859	NA			ort000756	1934.16	-1.91163	1.21688	-1.57093	0.116198	0.999494			ort006601	336.32	-2.27032	1.41374	-1.6059
ort008148	687.212	-2.58592	1.53267	-1.6872	0.0915657	0.771897			ort011466	929.964	1.90065	1.23778	1.53553	0.124653	0.963386			ort011392	50.5594	2.75001	1.81499	1.51516	0.129731	0.999867			ort003740	237.391	2.26374	1.445	1.56661	0.117207	NA			ort004682	171.348	2.35762	1.50086	1.57084	0.11622	NA			ort003286	108.684	2.77914	1.73195	1.60463
ort005719	155.965	2.83719	1.68287	1.68593	0.0918096	NA			ort008766	110.307	10.3909	6.76722	1.53547	0.124669	NA			ort001800	37.1017	3.01304	1.98949	1.51448	0.129903	0.999867			ort009160	987.208	2.06582	1.31881	1.56643	0.117248	NA			ort003839	62.4839	3.01497	1.92026	1.57008	0.116396	NA			ort008513	167.027	2.52457	1.57461	1.6033
ort010390	135.705	2.883	1.71042	1.68555	0.0918824	NA			ort010564	813.805	1.91036	1.24468	1.53482	0.124827	0.963386			ort006231	8.58771	-6.25479	4.13153	-1.51392	0.130047	0.999867			ort003893	1364.17	-2.04529	1.30639	-1.5656	0.117441	NA			ort002266	277.615	-2.18119	1.39002	-1.56917	0.116608	NA			ort006108	3514.86	-1.98525	1.2387	-1.60269
ort006256	175.886	2.79947	1.66144	1.68497	0.0919943	NA			ort002457	503.043	1.96296	1.27932	1.53438	0.124936	NA			ort006624	8.58771	-6.25479	4.13153	-1.51392	0.130047	0.999867			ort001385	683.871	2.09304	1.33692	1.56557	0.11745	NA			ort010685	127.308	-2.50391	1.59589	-1.56898	0.116653	NA			ort004375	210.47	-2.42721	1.51506	-1.60206
ort011482	2747.01	2.5256	1.50028	1.68342	0.092294	0.771897			ort003975	117.71	-2.37377	1.54722	-1.53422	0.124975	NA			ort007886	88.8965	-2.41203	1.59325	-1.51391	0.130049	0.999867			ort006279	70.4516	2.79101	1.78288	1.56545	0.117478	NA			ort007886	233.495	-2.23598	1.42512	-1.56898	0.116653	NA			ort006859	370.314	2.22915	1.39187	1.60155
ort008815	1517.25	-2.53915	1.5084	-1.68335	0.0923081	0.771897			ort008693	108.627	10.3687	6.76723	1.5322	0.125474	NA			ort003627	166.999	2.15217	1.42304	1.51237	0.130439	0.999867			ort005938	431.091	2.14589	1.37121	1.56497	0.117591	NA			ort011364	2653.77	-1.89414	1.2074	-1.56878	0.116698	0.999494			ort010984	30.1053	-4.38518	2.7398	-1.60055
ort011243	11959	-2.5085	1.49108	-1.68234	0.0925037	0.771897			ort008105	69.2889	2.6758	1.74686	1.53178	0.125577	NA			ort009158	9792.36	-1.84013	1.21703	-1.51198	0.130538	0.999867			ort009557	180.543	-2.33085	1.4896	-1.56475	0.117642	NA			ort005358	553.44	2.02528	1.29121	1.56851	0.116762	NA			ort006712	131.34	-2.6664	1.66609	-1.60039
ort011444	150.483	-2.81944	1.67596	-1.68229	0.0925136	NA			ort009659	347.045	2.01697	1.3176	1.53079	0.125821	NA			ort008892	1369.57	1.87361	1.24022	1.51071	0.130861	0.999867			ort008499	152.063	2.3937	1.53039	1.56411	0.117793	NA			ort006290	403.587	2.08353	1.32848	1.56836	0.116798	NA			ort008001	279.498	-2.31591	1.44714	-1.60034
ort011551	244.929	2.71358	1.61335	1.68196	0.0925764	NA			ort000817	1107.33	1.8795	1.22787	1.5307	0.125843	0.963386			ort004246	65.0374	2.56432	1.69764	1.51052	0.130911	0.999867			ort006131	358.254	2.16759	1.38814	1.5615	0.118405	NA			ort000876	2757.49	1.8909	1.20603	1.56787	0.116913	0.999494			ort003148	46.3509	-3.64214	2.27654	-1.59985
ort003814	134.115	-2.85395	1.6973	-1.68146	0.0926729	NA			ort002245	50.0389	2.92999	1.91707	1.52837	0.126421	NA			ort001322	744.147	-1.90874	1.2637	-1.51044	0.130931	0.999867			ort006242	107.928	-2.52011	1.61483	-1.5606	0.118619	NA			ort007730	777.564	-1.97651	1.26117	-1.56721	0.117067	0.999494			ort009896	10115.4	-1.95867	1.22444	-1.59965
ort004303	57.4381	3.34242	1.98795	1.68134	0.0926968	NA			ort004308	84.7328	2.53052	1.65713	1.52705	0.126747	NA			ort011156	23.9167	-3.5898	2.37814	-1.5095	0.131171	0.999867			ort010158	49.6072	3.05239	1.95714	1.55961	0.118851	NA			ort001051	1586.79	-1.91521	1.22214	-1.5671	0.117091	0.999494			ort006081	2053.48	-2.00132	1.25132	-1.59937
ort000837	5899.92	2.51075	1.49359	1.68101	0.0927605	0.771897			ort009145	116.817	-2.36066	1.54627	-1.52668	0.126841	NA			ort011473	1089.78	1.88108	1.24657	1.509	0.131298	0.999867			ort005821	1297.48	2.03587	1.30574	1.55918	0.118954	NA			ort009755	253.448	-2.20206	1.40634	-1.56581	0.117393	NA			ort000530	523.559	-2.1506	1.34504	-1.59892
ort007788	405.736	-2.62203	1.56012	-1.68065	0.0928306	0.771897			ort000060	103.302	-2.42268	1.58731	-1.52628	0.12694	NA			ort002485	302.204	2.00978	1.33211	1.50872	0.131371	0.999867			ort000063	28.1976	-3.6294	2.32859	-1.55862	0.119086	NA			ort007474	1241.09	1.92863	1.23185	1.56564	0.117433	0.999494			ort010383	116.225	-2.74095	1.71451	-1.59868
ort008499	78.7168	3.124	1.85895	1.68052	0.0928561	NA			ort008499	110.808	2.37976	1.55925	1.52622	0.126954	NA			ort004132	569.659	-1.9272	1.27803	-1.50795	0.131567	0.999867			ort002383	552.125	2.10121	1.34814	1.5586	0.119092	NA			ort003148	54.0622	-3.15653	2.0162	-1.56558	0.117446	NA			ort001449	55.7267	-3.40335	2.12896	-1.5986
ort001332	1369.21	-2.53627	1.50968	-1.68001	0.0929558	0.771897			ort008842	129.945	2.3044	1.51006	1.52603	0.127002	NA			ort003325	423.543	1.95808	1.29856	1.50788	0.131585	0.999867			ort001677	24539.6	1.98399	1.2741	1.55716	0.119431	0.793831			ort009945	54.0622	-3.15653	2.0162	-1.56558	0.117446	NA			ort003070	275.537	-2.31685	1.44933	-1.59857
ort003468	21.4461	4.8137	2.86611	1.67952	0.0930501	NA			ort007109	22.057	3.95112	2.58955	1.5258	0.127061	NA			ort002631	54.434	2.67695	1.77535	1.50784	0.131595	0.999867			ort002870	1862.97	-2.01576	1.29471	-1.55692	0.119489	NA			ort010783	279.865	2.16927	1.38567	1.5655	0.117465	NA			ort002433	221.932	2.38599	1.49329	1.5978
ort007036	115.199	-2.90358	1.72886	-1.67948	0.0930584	NA			ort006974	241.474	-2.09057	1.37075	-1.52513	0.127226	NA			ort011266	312.627	-2.00486	1.32996	-1.50747	0.131691	0.999867			ort011418	674.946	-2.07531	1.33312	-1.55673	0.119535	NA			ort011644	961.902	-1.9489	1.24559	-1.56465	0.117666	0.999494			ort008942	326.58	-2.26111	1.4153	-1.59761
ort011362	94.1665	3.02401	1.80066	1.67938	0.0930771	NA			ort007434	3266.13	-1.82492	1.19716	-1.52438	0.127414	0.963386			ort003406	449.442	1.94974	1.29351	1.50732	0.131728	0.999867			ort007216	14.0593	-5.01542	3.22735	-1.55403	0.120176	NA			ort004420	69.8563	2.89969	1.85397	1.56404	0.117808	NA			ort008136	529.531	2.14171	1.34076	1.59738
ort010209	219.18	2.72945	1.62653	1.67808	0.0933307	NA			ort005947	104.707	10.3157	6.76726	1.52435	0.12742	NA			ort009678	284.431	-2.02046	1.34088	-1.50682	0.131858	0.999867			ort003839	42.097	3.19257	2.05516	1.55344	0.120317	NA			ort003878	796.686	-1.96497	1.25742	-1.5627	0.118124	0.999494			ort003023	87.1744	2.91854	1.82875	1.59592
ort010269	648.586	-2.57212	1.5329	-1.67795	0.0933576	0.771897			ort001551	104.147	10.308	6.76726	1.52321	0.127706	NA			ort001303	88.0328	10.1922	6.76751	1.50605	0.132055	0.999867			ort004953	899.865	2.04514	1.31716	1.55269	0.120498	NA			ort004511	11.4648	-6.83695	4.37665	-1.56214	0.118254	NA			ort000139	369.703	-2.22067	1.39244	-1.5948
ort001055	8.10007	-7.01898	4.18328	-1.67787	0.0933731	NA			ort009871	56.9777	2.80238	1.84059	1.52255	0.127872	NA			ort005947	88.0328	10.1922	6.76751	1.50605	0.132055	0.999867			ort003322	3672.57	-1.98976	1.28182	-1.55229	0.120594	0.793831			ort006295	11.4648	-6.83695	4.37665	-1.56214	0.118254	NA			ort002535	280.913	-2.29935	1.44293	-1.59352
ort003782	206.834	-2.72579	1.62549	-1.6769	0.0935611	NA			ort003348	4756.8	-1.81408	1.1917	-1.52226	0.127944	0.963386			ort005857	165.776	2.13917	1.42145	1.50492	0.132345	0.999867			ort000191	934.386	2.04138	1.31523	1.55211	0.120636	NA			ort000400	652.799	-1.98868	1.27317	-1.56199	0.11829	NA			ort004970	55.9609	3.32064	2.08385	1.59351
ort009544	11.2036	6.36998	3.79926	1.67664	0.0936134	NA			ort010811	1123.81	-1.86202	1.22403	-1.52122	0.128205	0.963386			ort008124	131.6	-2.22182	1.47653	-1.50475	0.132388	0.999867			ort011227	748.062	-2.05575	1.32496	-1.55155	0.120769	NA			ort008299	180.728	2.31357	1.48177	1.56136	0.11844	NA			ort000712	2594.87	-1.97848	1.24177	-1.59327
ort010527	11.2036	6.36998	3.79926	1.67664	0.0936134	NA			ort000473	173.784	-2.18339	1.43541	-1.52109	0.128237	NA			ort009940	1448.09	1.85954	1.23631	1.5041	0.132557	0.999867			ort005870	119.945	-2.45033	1.57973	-1.55111	0.120875	NA			ort000865	1201.43	-1.92257	1.23168	-1.56093	0.118541	0.999494			ort009350	430.839	2.17317	1.36489	1.59219
ort005134	78.3773	3.11705	1.85913	1.67662	0.0936176	NA			ort004600	566.264	1.92066	1.26371	1.51986	0.128547	0.963386			ort007370	332.387	1.98409	1.31967	1.50348	0.132715	0.999867			ort008711	177.578	-2.30217	1.48596	-1.54928	0.121314	NA			ort009749	18.4302	-5.03589	3.22703	-1.56053	0.118634	NA			ort000400	317.932	-2.25737	1.41781	-1.59215
ort000343	5686.53	-2.49805	1.49191	-1.6744	0.0940527	0.771897			ort008695	1987.23	1.83011	1.20463	1.51923	0.128704	0.963386			ort001667	155.784	2.15125	1.43255	1.50169	0.133177	0.999867			ort002869	451.014	-2.10283	1.35841	-1.548	0.121622	NA			ort003523	620.576	-1.9895	1.27634	-1.55875	0.119055	NA			ort007807	350.543	2.2234	1.39664	1.59196
ort005945	286.865	2.66683	1.59335	1.67372	0.0941855	0.771897			ort001553	59.104	2.76275	1.81916	1.5187	0.128839	NA			ort000378	156.731	-2.15533	1.43569	-1.50125	0.13329	0.999867			ort005667	205.914	2.2594	1.46037	1.54714	0.121831	NA			ort010753	71.9503	2.85949	1.83493	1.55836	0.119148	NA			ort004023	317.568	-2.25537	1.41752	-1.59106
ort006294	346.633	11.3209	6.76659	1.67306	0.0943159	0.771897			ort004321	1103.37	-1.85824	1.22378	-1.51844	0.128904	0.963386			ort000655	212.069	2.06552	1.37658	1.50047	0.133493	0.999867			ort006552	647.084	2.06077	1.33228	1.5468	0.121911	NA			ort001616	1548.56	1.89894	1.21898	1.55781	0.119278	0.999494			ort007354	431.86	-2.17336	1.36655	-1.59041
ort003909	88.6371	-3.00047	1.79352	-1.67295	0.0943368	NA			ort009320	407.247	1.96491	1.29406	1.51841	0.128912	NA			ort005093	409.88	-1.948	1.29958	-1.49895	0.133887	0.999867			ort008529	226.508	2.23315	1.4438	1.54671	0.121932	NA			ort000213	2613.15	-1.8712	1.20248	-1.55612	0.11968	0.999494			ort003895	14.1834	-6.80939	4.28273	-1.58996
ort002659	27.954	4.16838	2.49167	1.67293	0.0943414	NA			ort008710	41.9803	3.07081	2.02241	1.51839	0.128916	NA			ort005980	719.214	-1.88979	1.26104	-1.4986	0.133978	0.999867			ort000457	9.69741	6.47419	4.18909	1.54549	0.122228	NA			ort007155	1314.36	-1.90178	1.22425	-1.55343	0.120321	0.999494			ort005796	14.1834	-6.80939	4.28273	-1.58996
ort008102	2283.97	2.50707	1.49973	1.67168	0.0945871	0.771897			ort010783	92.678	2.45593	1.61803	1.51785	0.129052	NA			ort001637	334.486	-1.97421	1.3186	-1.49721	0.13434	0.999867			ort008991	9.69741	6.47419	4.18909	1.54549	0.122228	NA			ort002767	125.015	-2.47301	1.59356	-1.55188	0.120692	NA			ort008727	14.1834	-6.80939	4.28273	-1.58996
ort008358	1205.54	2.52733	1.51191	1.67162	0.0945993	0.771897			ort006988	77.7245	-2.57057	1.69453	-1.51698	0.129272	NA			ort007815	1555.27	-1.84483	1.23236	-1.49699	0.134395	0.999867			ort007206	21.4249	-3.99438	2.58478	-1.54535	0.122262	NA			ort000855	71.4052	2.847	1.83503	1.55147	0.12079	NA			ort006675	221.585	-2.37818	1.49588	-1.58982
ort005944	6118.54	-2.49202	1.49085	-1.67154	0.0946144	0.771897			ort006200	6263.47	-1.799	1.18687	-1.51576	0.129581	0.963386			ort001181	78.4748	-2.43782	1.62911	-1.49641	0.134546	0.999867			ort008643	2056.07	-1.98947	1.28761	-1.54509	0.122326	NA			ort011452	770.399	-1.94722	1.2551	-1.55145	0.120795	0.999494			ort005497	104.883	2.76437	1.73935	1.58931
ort005416	118.824	-2.87441	1.71974	-1.67143	0.0946378	NA			ort001262	292.076	-2.02301	1.33586	-1.51439	0.129928	NA			ort003399	18998.3	-1.80919	1.20935	-1.496	0.134654	0.999867			ort004047	41.6753	3.17645	2.05622	1.5448	0.122396	NA			ort000251	687.025	1.95601	1.26275	1.54901	0.12138	NA			ort007481	1980.43	1.98205	1.24756	1.58875
ort011473	850.305	2.54417	1.52249	1.67105	0.0947111	0.771897			ort007645	598.938	1.90309	1.25708	1.5139	0.13005	0.963386			ort007524	7917.65	-1.81255	1.21202	-1.49548	0.134788	0.999867			ort007105	202.369	2.25843	1.46231	1.54443	0.122485	NA			ort009993	298.539	2.11636	1.3664	1.54886	0.121416	NA			ort010943	3057.18	-1.96268	1.23569	-1.58833
ort002453	2112.08	-2.50642	1.49992	-1.67104	0.0947142	0.771897			ort000096	9.37613	-6.50821	4.29938	-1.51376	0.130087	NA			ort005936	259.093	-2.01627	1.3484	-1.4953	0.134835	0.999867			ort007227	2229.31	1.98315	1.28539	1.54283	0.122871	NA			ort007223	763.959	1.94212	1.25413	1.54858	0.121483	0.999494			ort000395	958.661	-2.03853	1.28383	-1.58785
ort006302	34.1224	3.85261	2.30581	1.67083	0.0947553	NA			ort011073	63.3163	-2.70895	1.78966	-1.51367	0.130109	NA			ort007566	47.8251	-2.77039	1.85303	-1.49506	0.134898	0.999867			ort000212	1230.68	-2.0024	1.29939	-1.54103	0.12331	NA			ort010423	219.424	2.21073	1.42783	1.54832	0.121546	NA			ort006419	92.0986	-2.88233	1.81546	-1.58766
ort009004	34.1224	3.85261	2.30581	1.67083	0.0947553	NA			ort009679	85.7392	2.49104	1.64605	1.51334	0.130194	NA			ort010936	72.3449	-2.47879	1.65912	-1.49404	0.135165	0.999867			ort008842	166.162	2.31104	1.49982	1.54088	0.123346	NA			ort006349	1595.58	1.87833	1.21362	1.54771	0.121692	0.999494			ort004166	832.528	-2.05433	1.2941	-1.58745
ort006847	431.856	2.60072	1.55716	1.67016	0.0948869	0.771897			ort004714	162.168	-2.19207	1.44856	-1.51328	0.13021	NA			ort005099	403.154	1.93833	1.29751	1.49389	0.135205	0.999867			ort005962	81.3511	-2.61966	1.70073	-1.54031	0.123484	NA			ort008150	533.884	-1.98959	1.28611	-1.54698	0.121868	NA			ort004809	736.22	-2.07002	1.30425	-1.58713
ort007545	483.835	-2.58155	1.54603	-1.6698	0.0949591	0.771897			ort001706	409.475	-1.95429	1.2921	-1.51249	0.130409	NA			ort001789	429.901	-1.93225	1.29353	-1.49378	0.135233	0.999867			ort005266	105.816	2.4879	1.61709	1.5385	0.123925	NA			ort003018	356.226	-2.06559	1.33684	-1.54514	0.122313	NA			ort009991	368.292	2.20006	1.38629	1.58701
ort005874	123.184	-2.85723	1.71143	-1.66949	0.0950196	NA			ort009215	15184.6	-1.78539	1.18088	-1.51191	0.130556	0.963386			ort011544	1544.16	1.83875	1.23095	1.49376	0.135238	0.999867			ort010596	276.813	2.16746	1.4096	1.53764	0.124136	NA			ort008116	70.86	2.8344	1.83498	1.54464	0.122432	NA			ort006224	1017.22	-2.03035	1.27944	-1.58691
ort001414	362.41	-2.61268	1.56555	-1.66886	0.0951447	0.771897			ort002260	276.215	-2.03053	1.34323	-1.51167	0.130617	NA			ort009557	186.356	-2.0894	1.39899	-1.4935	0.135306	0.999867			ort010383	135.177	-2.3689	1.54152	-1.53673	0.124359	NA			ort004312	110.366	-2.52314	1.63546	-1.54277	0.122887	NA			ort001010	329.41	-2.23409	1.40852	-1.58612
ort006248	1777.3	2.50738	1.50283	1.66844	0.0952288	0.771897			ort003727	27.9893	3.52827	2.33498	1.51105	0.130776	NA			ort007817	15106.3	-1.80503	1.20886	-1.49316	0.135395	0.999867			ort002441	1091.81	-1.99965	1.30166	-1.53623	0.124483	NA			ort003451	137.584	2.39239	1.55255	1.54094	0.123331	NA			ort000764	3625.8	1.95163	1.23075	1.58572
ort005816	952.034	-2.52941	1.5162	-1.66826	0.0952648	0.771897			ort002875	587.186	1.89946	1.25737	1.51065	0.130877	0.963386			ort006757	99.2972	2.29935	1.54043	1.49267	0.135523	0.999867			ort008192	365.185	2.10748	1.3742	1.53361	0.125126	NA			ort009182	16111.3	-1.81259	1.17641	-1.54079	0.123369	0.999494			ort010749	278.616	2.27744	1.43644	1.58547
ort007211	1773.92	-2.50412	1.50173	-1.66749	0.0954163	0.771897			ort008957	169.111	2.1665	1.43475	1.51002	0.131039	NA			ort008537	312.2	1.97285	1.32211	1.4922	0.135648	0.999867			ort002663	8.30119	-6.74181	4.39848	-1.53276	0.125335	NA			ort006610	294.531	-2.10327	1.36581	-1.53995	0.123573	NA			ort007941	860.535	-2.04628	1.29067	-1.58544
ort009788	1727.02	-2.50479	1.50217	-1.66745	0.0954248	0.771897			ort010197	303.359	-2.00591	1.32857	-1.50983	0.131087	NA			ort008068	667.928	-1.88327	1.26246	-1.49174	0.135767	0.999867			ort006628	116370	-1.93492	1.26264	-1.53244	0.125414	0.793831			ort006953	1326.4	-1.8758	1.21815	-1.53987	0.123592	0.999494			ort003049	5567.6	-1.94043	1.22412	-1.58516
ort006079	21.1066	4.78985	2.87275	1.66734	0.0954474	NA			ort003288	170.677	2.15737	1.4313	1.50729	0.131737	NA			ort001272	1985.55	-1.82734	1.2251	-1.49159	0.135807	0.999867			ort010563	51.4651	2.94103	1.91983	1.53192	0.125542	NA			ort010080	178.195	-2.27411	1.47699	-1.5397	0.123634	NA			ort004998	402.722	-2.17848	1.37448	-1.58495
ort003524	45.4408	3.50357	2.10462	1.6647	0.0959716	NA			ort004422	85.1793	2.4799	1.6457	1.50689	0.131838	NA			ort002767	63.15	-2.5574	1.71459	-1.49155	0.135817	0.999867			ort000900	320.765	-2.12353	1.38626	-1.53184	0.125562	NA			ort009021	62.9425	2.92186	1.89777	1.53963	0.123651	NA			ort008804	45.5696	3.52734	2.22606	1.58457
ort003750	307.134	-2.62755	1.57849	-1.66459	0.0959938	0.771897			ort004929	137.776	2.2371	1.48499	1.50648	0.131944	NA			ort010133	453.73	1.91933	1.28683	1.49152	0.135825	0.999867			ort002455	479.949	-2.06149	1.34623	-1.53131	0.125693	NA			ort011572	247.105	2.15146	1.39789	1.53908	0.123785	NA			ort004340	152.471	2.52659	1.59461	1.58446
ort006282	8396.6	-2.47557	1.48772	-1.66401	0.0961114	0.771897			ort007436	1592.97	-1.81677	1.20607	-1.50635	0.131977	0.963386			ort010848	24.0529	3.42807	2.29882	1.49123	0.135901	0.999867			ort004458	410.088	2.0839	1.36129	1.53083	0.125811	NA			ort000945	10.3578	6.93989	4.50993	1.5388	0.123853	NA			ort005248	1492.75	1.98669	1.25568	1.58217
ort010524	244.987	2.67655	1.60853	1.66397	0.0961176	NA			ort011483	93.6844	2.42181	1.60848	1.50565	0.132158	NA			ort006818	539.586	1.89891	1.27394	1.49058	0.136071	0.999867			ort004528	24.2183	-3.73982	2.4447	-1.52977	0.126075	NA			ort009194	395.781	2.0274	1.31786	1.5384	0.123951	NA			ort001592	10.9988	7.36104	4.65286	1.58205
ort007596	611.596	2.55191	1.53459	1.66293	0.0963274	0.771897			ort001475	348.717	1.96797	1.30716	1.50553	0.132188	NA			ort005796	19.216	-3.8793	2.60463	-1.48939	0.136386	0.999867			ort010988	1173.21	-1.98228	1.29625	-1.52924	0.126204	NA			ort005757	7118.15	1.81397	1.17986	1.53745	0.124184	0.999494			ort006516	29.3779	-4.34819	2.74899	-1.58174
ort005606	39.6118	3.63787	2.18978	1.6613	0.0966539	NA			ort002298	346.924	-1.96985	1.30873	-1.50516	0.132283	NA			ort003893	879.188	-1.85766	1.24793	-1.4886	0.136594	0.999867			ort009850	64.3775	2.756	1.80345	1.52818	0.126467	NA			ort008536	847.288	1.90673	1.24135	1.53602	0.124533	0.999494			ort010924	29.3779	-4.34819	2.74899	-1.58174
ort007455	82.1692	3.05292	1.83774	1.66124	0.0966658	NA			ort006128	30.6755	3.38553	2.25011	1.50461	0.132426	NA			ort006562	71.9359	-2.46914	1.65878	-1.48853	0.136612	0.999867			ort009198	186.037	-2.24193	1.46737	-1.52786	0.126547	NA			ort009266	11.0062	-6.77806	4.41611	-1.53485	0.124822	NA			ort004095	407.733	-2.16733	1.37086	-1.58101
ort009307	214.423	-2.68487	1.61662	-1.66079	0.096755	NA			ort002025	1078.8	-1.83412	1.21945	-1.50406	0.132566	0.963386			ort007302	18485.6	-1.79564	1.20661	-1.48817	0.136706	0.999867			ort008695	2922.89	1.94734	1.2748	1.52757	0.12662	0.793831			ort005935	3873.12	1.81807	1.1855	1.5336	0.125129	0.999494			ort009798	430.729	-2.15332	1.36251	-1.58041
ort002717	187.521	-2.71506	1.63488	-1.66072	0.0967705	NA			ort003458	415.411	1.93387	1.28622	1.50353	0.132703	NA			ort009703	1536.47	-1.82904	1.22934	-1.48783	0.136795	0.999867			ort006698	268.038	2.15263	1.40957	1.52715	0.126724	NA			ort006159	166.842	-2.28852	1.49228	-1.53357	0.125134	NA			ort007383	49.9478	-3.47374	2.19943	-1.57939
ort010247	326.942	11.2365	6.7666	1.66059	0.0967965	0.771897			ort005197	87.5544	-2.46341	1.63852	-1.50344	0.132726	NA			ort008303	769.266	-1.86523	1.25369	-1.48779	0.136807	0.999867			ort008617	84.5661	-2.56467	1.67957	-1.52698	0.126766	NA			ort005182	5544.7	1.81	1.18056	1.53317	0.125234	0.999494			ort008552	3230.72	-1.94301	1.23047	-1.57907
ort011618	398.241	2.59063	1.56052	1.6601	0.0968941	0.771897			ort002825	717.215	1.86501	1.24054	1.50338	0.132741	0.963386			ort000697	95.2289	-2.31937	1.55896	-1.48777	0.136811	0.999867			ort002947	363.839	-2.09146	1.37	-1.52661	0.126857	NA			ort006442	34.9152	3.5471	2.31433	1.53267	0.125358	NA			ort001689	496.119	-2.11967	1.34268	-1.57869
ort010890	325.923	11.232	6.7666	1.65992	0.0969303	0.771897			ort011565	122.892	2.27986	1.51654	1.50333	0.132753	NA			ort005269	5707.13	-1.80158	1.21108	-1.48759	0.13686	0.999867			ort010220	689.651	-2.0118	1.31881	-1.52547	0.127141	NA			ort010121	11880.5	1.79963	1.17435	1.53244	0.125413	0.999494			ort002769	83.3736	2.90512	1.8412	1.57784
ort007926	2643.14	-2.4805	1.49441	-1.65986	0.0969431	0.771897			ort001188	221.148	-2.06927	1.37731	-1.5024	0.132994	NA			ort001843	257.049	-2.002	1.34627	-1.48707	0.136996	0.999867			ort001175	486.801	-2.04664	1.34234	-1.52468	0.127339	NA			ort007319	411.902	2.00641	1.30968	1.53199	0.125524	NA			ort009759	421.539	2.14286	1.36049	1.57506
ort007996	274.399	-2.63606	1.58816	-1.65982	0.0969506	0.771897			ort002861	1017.15	-1.83357	1.22115	-1.5015	0.133226	0.963386			ort009522	1550.89	1.82675	1.22842	1.48706	0.136998	0.999867			ort000092	2219.27	-1.94698	1.27764	-1.52389	0.127535	NA			ort005807	62.3973	2.90764	1.89822	1.53177	0.125579	NA			ort010998	788.559	-2.03502	1.29283	-1.57409
ort009579	626.61	-2.53866	1.52989	-1.65938	0.0970396	0.771897			ort000530	402.665	-1.93597	1.28961	-1.50121	0.133302	NA			ort003784	480.447	1.90202	1.28027	1.48564	0.137375	0.999867			ort000841	269.896	2.14366	1.40705	1.52352	0.127628	NA			ort007242	1601.36	1.84827	1.20678	1.53158	0.125627	0.999494			ort006963	771.346	2.03509	1.2931	1.57381
ort005038	470.298	-2.55869	1.54448	-1.65667	0.097586	0.772897			ort001854	4361.22	-1.77735	1.18467	-1.50029	0.13354	0.963386			ort009167	40.8773	-2.87932	1.93887	-1.48505	0.13753	0.999867			ort000874	195.03	2.22374	1.45978	1.52334	0.127674	NA			ort001414	402.985	-2.01031	1.31296	-1.53114	0.125736	NA			ort000853	156.312	2.48863	1.58132	1.57377
ort006874	2162.48	2.47761	1.49658	1.65552	0.0978198	0.772897			ort007428	415.858	1.92641	1.28461	1.49961	0.133716	NA			ort005703	19299.3	-1.79003	1.2054	-1.48501	0.137541	0.999867			ort004801	99.3763	-2.47173	1.62259	-1.52333	0.127676	NA			ort006786	1606.44	-1.84686	1.2065	-1.53076	0.125829	0.999494			ort001378	431.283	2.13437	1.35653	1.5734
ort006937	3129.48	2.46944	1.49203	1.65509	0.0979057	0.772897			ort006776	223.607	2.05766	1.37232	1.4994	0.13377	NA			ort008022	258.568	1.99229	1.34195	1.48462	0.137646	0.999867			ort006745	20.832	-3.95132	2.59446	-1.52298	0.127764	NA			ort011418	368.296	-2.02843	1.32533	-1.5305	0.125892	NA			ort006463	183.765	2.4104	1.53198	1.57338
ort002821	55.7406	3.2948	1.99149	1.65444	0.0980378	NA			ort009011	8.39899	6.67607	4.45277	1.49931	0.133793	NA			ort007226	35.879	2.95859	1.99383	1.48388	0.137842	0.999867			ort010242	20.832	-3.95132	2.59446	-1.52298	0.127764	NA			ort008847	659.255	-1.92556	1.25856	-1.52997	0.126024	NA			ort007786	1354.04	-1.97696	1.2571	-1.57264
ort008115	10.8641	6.32558	3.82395	1.6542	0.0980871	NA			ort009500	8.39899	6.67607	4.45277	1.49931	0.133793	NA			ort003669	23512.7	-1.78742	1.20461	-1.48381	0.137858	0.999867			ort002165	272.948	-2.13577	1.40281	-1.52249	0.127885	NA			ort009635	646.898	-1.9276	1.2601	-1.52971	0.126087	NA			ort003383	13.8197	-6.77192	4.30661	-1.57245
ort002490	71.1903	3.11565	1.88587	1.6521	0.0985135	NA			ort008744	225.393	-2.05682	1.37233	-1.49878	0.133931	NA			ort007313	1189.53	1.83159	1.23448	1.48369	0.137892	0.999867			ort009182	18230.3	-1.91769	1.26029	-1.52162	0.128104	0.793831			ort007068	4759.98	1.80621	1.1809	1.52952	0.126135	0.999494			ort005892	367.804	-2.17502	1.38328	-1.57236
ort005232	120.992	2.85109	1.72605	1.6518	0.0985754	NA			ort004836	60.1104	2.69588	1.79989	1.4978	0.134185	NA			ort008151	14.5152	-4.50732	3.03889	-1.48321	0.138019	0.999867			ort008270	86.1736	-2.53922	1.66974	-1.52073	0.128328	NA			ort002712	278.965	-2.09608	1.37076	-1.52914	0.126231	NA			ort007808	6039.51	1.91274	1.21719	1.57145
ort005831	179.056	2.7222	1.64904	1.65077	0.0987847	NA			ort010273	53.5998	-2.80261	1.87135	-1.49764	0.134227	NA			ort001509	84.8192	2.35061	1.58573	1.48235	0.138247	0.999867			ort010770	416.255	2.05724	1.35474	1.51854	0.128877	NA			ort000980	1149.09	-1.86505	1.22028	-1.52838	0.126417	0.999494			ort003014	1098.21	-1.99163	1.26787	-1.57084
ort006757	135.423	2.80652	1.70063	1.65028	0.0988851	NA			ort010209	524.851	1.88835	1.26139	1.49703	0.134385	NA			ort000097	57.0859	2.58009	1.74089	1.48205	0.138327	0.999867			ort006818	865.542	1.98123	1.3048	1.51842	0.12891	NA			ort010154	448.196	-1.98284	1.29776	-1.5279	0.126538	NA			ort008424	90.2803	-2.84962	1.81551	-1.5696
ort000576	20.9005	-4.28688	2.59783	-1.65018	0.0989065	NA			ort003338	154.673	2.16955	1.45027	1.49596	0.134663	NA			ort005813	283.2	-1.97384	1.33184	-1.48203	0.138332	0.999867			ort000060	111.393	-2.40337	1.58455	-1.51676	0.129328	NA			ort006380	129.121	2.39421	1.56709	1.5278	0.126561	NA			ort001702	695.578	2.04054	1.30022	1.56937
ort007269	81.1507	3.03274	1.83816	1.64988	0.0989682	NA			ort007545	688.293	-1.85646	1.24099	-1.49595	0.134666	0.963386			ort000882	969.279	1.83824	1.24076	1.48155	0.138461	0.999867			ort006160	9.27578	6.41006	4.22875	1.51583	0.129563	NA			ort004248	31.0719	-3.72781	2.44002	-1.52778	0.126568	NA			ort001853	576.307	2.06889	1.31873	1.56886
ort005096	226.821	2.66311	1.61437	1.64962	0.09902	NA			ort002229	3199.62	-1.77518	1.18699	-1.49553	0.134777	0.963386			ort009042	27324.5	-1.78252	1.20345	-1.48118	0.138559	0.999867			ort007480	9.27578	6.41006	4.22875	1.51583	0.129563	NA			ort006217	201.953	2.19358	1.43702	1.52648	0.12689	NA			ort009919	93.8771	-2.81415	1.79501	-1.56776
ort009460	335.054	-2.58477	1.56705	-1.64944	0.099057	0.772897			ort001449	78.7309	-2.50983	1.67858	-1.49522	0.134858	NA			ort000730	780.704	-1.85209	1.25052	-1.48105	0.138592	0.999867			ort010095	148.63	-2.28546	1.50862	-1.51494	0.129788	NA			ort008951	370.48	2.01762	1.32184	1.52637	0.126917	NA			ort008501	1146.3	1.97835	1.26268	1.56678
ort010280	297.619	-2.60158	1.57752	-1.64916	0.0991159	0.772897			ort011180	123.522	-2.26461	1.51483	-1.49496	0.134924	NA			ort006940	1212.01	-1.82664	1.23343	-1.48094	0.138622	0.999867			ort008567	1137.99	-1.95632	1.2915	-1.51476	0.129833	NA			ort005901	227.082	2.15103	1.40971	1.52587	0.127043	NA			ort002841	704.417	-2.03494	1.29932	-1.56617
ort002361	169.096	2.73433	1.6581	1.64907	0.0991335	NA			ort002522	98.9434	2.36618	1.58355	1.49423	0.135116	NA			ort009294	8.17877	-6.1844	4.17626	-1.48084	0.138648	0.999867			ort007295	203.891	-2.18852	1.44483	-1.51473	0.129841	NA			ort001386	748.759	-1.90156	1.24634	-1.52572	0.12708	0.999494			ort005562	76.0958	2.94829	1.88276	1.56594
ort009688	55.4011	3.28509	1.99224	1.64894	0.0991593	NA			ort007308	40.8604	3.02708	2.02636	1.49386	0.135213	NA			ort010736	405.175	-1.91383	1.29336	-1.47973	0.138946	0.999867			ort003424	117.402	-2.3751	1.56841	-1.51434	0.12994	NA			ort001501	454.417	-1.97538	1.29499	-1.5254	0.127159	NA			ort005266	123.32	2.60037	1.66086	1.56567
ort006635	76.0007	3.06742	1.86054	1.64867	0.0992153	NA			ort001984	4114.82	-1.76684	1.18294	-1.4936	0.135279	0.963386			ort010134	150.485	2.11542	1.43038	1.47893	0.13916	0.999867			ort004923	227.443	2.16343	1.42872	1.51424	0.129965	NA			ort002738	1064.46	1.86486	1.22274	1.52514	0.127224	0.999494			ort004887	20.6627	4.77648	3.05094	1.56558
ort005614	281.988	-2.60857	1.58253	-1.64835	0.0992802	0.772897			ort008537	326.781	1.95582	1.31032	1.49262	0.135537	NA			ort000682	114.23	-2.22099	1.5018	-1.47889	0.13917	0.999867			ort000438	63.5761	-2.70914	1.78927	-1.5141	0.129999	NA			ort001509	182.562	2.22868	1.46162	1.5248	0.12731	NA			ort010403	20.6627	4.77648	3.05094	1.56558
ort010357	207.117	-2.66676	1.61791	-1.64828	0.0992962	NA			ort006966	4576.27	-1.76299	1.18132	-1.49239	0.135596	0.963386			ort001844	1141.93	-1.82569	1.23457	-1.47881	0.13919	0.999867			ort004676	65.7766	-2.68455	1.77376	-1.51348	0.130158	NA			ort004132	1322.42	-1.84571	1.21149	-1.52351	0.127632	0.999494			ort002332	10544.2	1.89252	1.20957	1.56462
ort007248	440.573	2.5551	1.55022	1.64821	0.0993089	0.772897			ort008180	151.987	2.16687	1.45283	1.49149	0.135834	NA			ort008893	518.585	1.87949	1.27188	1.47772	0.139483	0.999867			ort001029	447.021	-2.03465	1.34469	-1.5131	0.130255	NA			ort007304	375.521	-2.01007	1.3194	-1.52347	0.127641	NA			ort007466	137.915	2.52904	1.61818	1.56289
ort002695	757.778	2.50648	1.52116	1.64774	0.0994069	0.772897			ort008223	112.514	-10.0927	6.76708	-1.49144	0.135846	NA			ort010638	18238.4	-1.77749	1.20291	-1.47766	0.139498	0.999867			ort001818	241.37	2.14654	1.41875	1.51298	0.130285	NA			ort008280	380.28	-2.00665	1.31745	-1.52313	0.127726	NA			ort005772	70.114	-3.04826	1.9516	-1.56193
ort001818	187.998	2.70242	1.64041	1.64741	0.0994741	NA			ort001412	817.809	1.83042	1.22794	1.49064	0.136055	0.963386			ort004879	163.129	2.08705	1.41318	1.47684	0.139717	0.999867			ort006919	15.7715	4.67796	3.10151	1.50828	0.131482	NA			ort007193	19203.3	-1.77976	1.16858	-1.52301	0.127756	0.999494			ort007818	912.326	1.98826	1.27446	1.56008
ort002441	301.243	-2.59503	1.5758	-1.6468	0.0995988	0.772897			ort002645	53.1533	-2.78881	1.87197	-1.48977	0.136284	NA			ort004555	1155.82	-1.82125	1.23338	-1.47663	0.139775	0.999867			ort008783	405.793	2.03818	1.35241	1.50707	0.131793	NA			ort001710	985.707	-1.86717	1.22634	-1.52255	0.12787	0.999494			ort009990	16.1744	5.44204	3.49238	1.55826
ort008487	1253.03	2.47768	1.50481	1.64651	0.0996595	0.772897			ort007272	908.13	-1.81979	1.22212	-1.48905	0.136475	0.963386			ort002433	155.706	-2.1064	1.42676	-1.47635	0.139849	0.999867			ort010975	5814.93	-1.89777	1.25939	-1.50691	0.131835	0.793831			ort008502	702.998	1.89969	1.24893	1.52106	0.128245	0.999494			ort005355	1054.93	-1.97034	1.2649	-1.55771
ort008329	283.188	2.61394	1.5876	1.64647	0.0996664	0.772897			ort007786	1257.99	-1.79719	1.20748	-1.48838	0.13665	0.963386			ort005565	601.519	-1.86441	1.26287	-1.47632	0.139858	0.999867			ort009958	32.0055	-3.29925	2.18994	-1.50655	0.131927	NA			ort001025	306.143	-2.05383	1.35041	-1.52089	0.128288	NA			ort000033	22.1443	-4.96403	3.18861	-1.5568
ort004242	240.234	2.64381	1.60617	1.64603	0.0997577	NA			ort010530	15.2938	-4.71768	3.17006	-1.4882	0.136699	NA			ort007901	183.084	-2.05777	1.39478	-1.47534	0.140122	0.999867			ort001288	455.677	2.02004	1.34137	1.50595	0.13208	NA			ort011588	756.529	-1.88917	1.24303	-1.51982	0.128557	0.999494			ort000327	140.705	2.50351	1.60818	1.55673
ort006026	173.227	2.71996	1.65303	1.64544	0.0998787	NA			ort010357	272.31	-1.98641	1.33566	-1.48721	0.13696	NA			ort001110	113.821	-2.21471	1.50124	-1.47525	0.140145	0.999867			ort000929	576.07	-1.98854	1.32165	-1.50459	0.132429	NA			ort004768	130.125	2.36973	1.56009	1.51898	0.128769	NA			ort006637	291.229	2.20162	1.41454	1.55642
ort001856	491.111	2.53742	1.54238	1.64513	0.0999425	0.772897			ort003265	1251.87	1.79275	1.20649	1.48592	0.1373	0.963386			ort008230	2309.57	-1.79309	1.21621	-1.47433	0.140394	0.999867			ort000502	26.4188	-3.52752	2.34479	-1.5044	0.132478	NA			ort003391	1901.19	-1.81452	1.19541	-1.5179	0.129039	0.999494			ort008562	270.367	2.22497	1.42955	1.55641
ort010179	958.175	2.48676	1.51195	1.64473	0.100025	0.772897			ort000604	24.1832	3.64856	2.45635	1.48536	0.137449	NA			ort002061	771.263	1.83904	1.2477	1.47394	0.140498	0.999867			ort003455	1094.48	-1.93884	1.28878	-1.5044	0.132479	NA			ort008706	2126.87	1.80849	1.19176	1.5175	0.12914	0.999494			ort009572	2156.55	-1.91645	1.23165	-1.556
ort010757	9688.69	-2.43833	1.48261	-1.64462	0.100049	0.772897			ort006881	316.596	1.9474	1.31156	1.4848	0.137598	NA			ort005488	140.492	2.12698	1.44317	1.47383	0.140527	0.999867			ort007436	968.897	-1.94413	1.29316	-1.5034	0.132736	NA			ort010988	2424.14	-1.80203	1.1881	-1.51674	0.129332	0.999494			ort003607	145.921	2.47966	1.59478	1.55486
ort003172	177.698	2.70954	1.64837	1.64377	0.100223	NA			ort003328	870.959	1.81375	1.2221	1.48412	0.137777	0.963386			ort006377	2470.05	1.78981	1.21461	1.47356	0.1406	0.999867			ort000579	41.9932	-3.00975	2.00261	-1.50291	0.132862	NA			ort005420	409.38	-1.97836	1.30445	-1.51663	0.129361	NA			ort005579	13.456	-6.73344	4.3316	-1.55449
ort005147	65.3614	3.14769	1.91629	1.6426	0.100466	NA			ort006728	889.422	1.81021	1.22061	1.48304	0.138063	0.963386			ort006081	839.95	-1.83374	1.24443	-1.47355	0.140602	0.999867			ort002168	370.77	-2.04006	1.35794	-1.50232	0.133014	NA			ort007151	125.647	-2.38659	1.57371	-1.51654	0.129384	NA			ort005580	772.193	-1.99728	1.28583	-1.5533
ort006298	20.4276	4.74094	2.88662	1.64239	0.10051	NA			ort011044	20.9371	3.87095	2.61027	1.48297	0.138082	NA			ort011417	462.301	1.88395	1.27865	1.47339	0.140646	0.999867			ort001233	191.11	-2.17876	1.45076	-1.5018	0.133148	NA			ort010575	2722.95	-1.7973	1.18522	-1.51642	0.129413	0.999494			ort007817	1958.56	-1.91548	1.23355	-1.55282
ort008200	906.608	-2.47956	1.51109	-1.6409	0.100818	0.772897			ort000508	108.049	-10.0343	6.7671	-1.4828	0.138126	NA			ort003851	18.807	-3.84613	2.61243	-1.47225	0.140955	0.999867			ort008297	77.7934	-2.54438	1.69732	-1.49905	0.13386	NA			ort007679	297.102	2.05024	1.35242	1.51598	0.129525	NA			ort000873	62.2275	3.08847	1.99096	1.55124
ort003497	5454.52	-2.43453	1.48401	-1.64051	0.100899	0.772897			ort010428	546.322	-1.85763	1.25307	-1.48246	0.138219	NA			ort010005	186.174	2.041	1.38674	1.47179	0.141076	0.999867			ort004318	223.649	2.13368	1.42449	1.49786	0.134171	NA			ort001921	353.275	-2.00845	1.32503	-1.51578	0.129575	NA			ort003971	62.2275	3.08847	1.99096	1.55124
ort001341	296.726	11.0966	6.76661	1.63991	0.101024	0.772897			ort008702	749.768	1.82318	1.22998	1.48229	0.138264	0.963386			ort007536	278.556	1.95065	1.32684	1.47015	0.141522	0.999867			ort005379	473.913	1.99833	1.3344	1.49755	0.13425	NA			ort011079	690.993	-1.8922	1.24845	-1.51563	0.129613	NA			ort006843	165.044	2.40683	1.55268	1.55011
ort001554	3348.06	2.4388	1.48762	1.6394	0.10113	0.772897			ort005983	146.615	2.16123	1.45819	1.48213	0.138307	NA			ort003819	213.093	2.00377	1.36359	1.46948	0.141703	0.999867			ort007646	90.4032	-2.45874	1.64185	-1.49755	0.134251	NA			ort002535	464.567	-1.95219	1.28808	-1.51558	0.129624	NA			ort003435	452.474	-2.07858	1.34192	-1.54896
ort000355	323.087	2.57637	1.57253	1.63837	0.101345	0.772897			ort005257	8.92965	-6.43782	4.34824	-1.48056	0.138725	NA			ort011362	60.3491	2.51297	1.71026	1.46936	0.141736	0.999867			ort001033	95.3542	2.44165	1.63093	1.49709	0.134371	NA			ort006974	314.286	-2.03628	1.34358	-1.51556	0.12963	NA			ort002326	59.8016	3.11648	2.01375	1.5476
ort008605	213.629	-2.63983	1.61133	-1.63829	0.101361	NA			ort005935	3396.12	1.74695	1.18044	1.47992	0.138894	0.963386			ort010694	23.4416	3.38743	2.30583	1.46908	0.141812	0.999867			ort002637	66.7912	-2.63239	1.75865	-1.49682	0.134439	NA			ort010213	704.919	1.88781	1.24613	1.51494	0.129786	0.999494			ort004238	23629.7	-1.85482	1.19896	-1.54702
ort001103	219.295	2.64698	1.61579	1.6382	0.10138	NA			ort006848	1102.95	-1.78932	1.20949	-1.4794	0.139035	0.963386			ort010105	269.175	1.95449	1.33061	1.46886	0.14187	0.999867			ort002979	13734.7	-1.87299	1.25132	-1.49681	0.134442	0.793831			ort006111	561.149	1.91832	1.26652	1.51464	0.129862	NA			ort010519	95.2919	-2.7444	1.77568	-1.54554
ort006837	121.315	-2.79506	1.70619	-1.63819	0.101383	NA			ort006763	2979.38	-1.74907	1.18232	-1.47935	0.139047	0.963386			ort010485	969.071	-1.81398	1.23627	-1.4673	0.142294	0.999867			ort008316	359.796	2.03532	1.36008	1.49648	0.13453	NA			ort003103	3915.16	1.78321	1.17752	1.51438	0.129929	0.999494			ort006220	10404.3	-1.85767	1.20207	-1.5454
ort010907	44.0828	3.45588	2.11013	1.63776	0.101472	NA			ort000694	1553.89	1.77021	1.19676	1.47917	0.139095	0.963386			ort004529	30.0466	-3.14235	2.1424	-1.46674	0.142446	0.999867			ort009528	362.497	2.03373	1.3592	1.49627	0.134582	NA			ort006774	22.1855	-4.27407	2.82308	-1.51397	0.130032	NA			ort000173	118.832	2.57341	1.6653	1.54531
ort010081	26.7341	-3.8825	2.37075	-1.63767	0.101491	NA			ort011134	216.236	-2.02904	1.37214	-1.47874	0.13921	NA			ort003869	34569.7	-1.75721	1.19805	-1.46673	0.142451	0.999867			ort007797	1084.82	-1.9193	1.28488	-1.49375	0.13524	NA			ort004932	66.0403	2.80743	1.85538	1.51313	0.130248	NA			ort001098	21.7807	-4.93936	3.19652	-1.54523
ort011619	26.7341	-3.8825	2.37075	-1.63767	0.101491	NA			ort003627	205.364	2.03937	1.37996	1.47785	0.139449	NA			ort010770	326.278	1.91749	1.30749	1.46654	0.142502	0.999867			ort008951	266.866	2.08181	1.39515	1.49217	0.135654	NA			ort002717	168.391	-2.23884	1.47964	-1.51309	0.130256	NA			ort006819	544.123	2.03176	1.315	1.54507
ort005032	32.7644	3.78987	2.31677	1.63584	0.101873	NA			ort010911	10785.4	-1.72897	1.17	-1.47775	0.139475	0.963386			ort006026	212.482	1.99859	1.36288	1.46645	0.142526	0.999867			ort008552	1766.63	-1.89471	1.26981	-1.49213	0.135666	NA			ort009314	529.739	1.92339	1.27155	1.51263	0.130373	NA			ort009628	23.776	4.37795	2.83394	1.54483
ort010005	161.909	2.7185	1.66198	1.6357	0.101903	NA			ort002999	1158.8	-1.78285	1.20661	-1.47757	0.139524	0.963386			ort005450	418.86	-1.88471	1.28532	-1.46634	0.142556	0.999867			ort001789	1655.36	1.89679	1.27153	1.49173	0.135769	NA			ort001320	497.325	1.93351	1.27833	1.51253	0.130399	NA			ort011181	43.5074	3.45459	2.23643	1.54469
ort008381	94.5634	2.91862	1.78534	1.63477	0.102097	NA			ort008068	1459.18	-1.76953	1.19803	-1.47704	0.139666	0.963386			ort006366	486.164	1.86549	1.27226	1.46628	0.142572	0.999867			ort000279	392.26	-2.01038	1.34774	-1.49167	0.135787	NA			ort004447	296.253	-2.045	1.35215	-1.51241	0.13043	NA			ort002124	237.631	-2.25137	1.45755	-1.54463
ort007769	107.496	-2.83158	1.73248	-1.63441	0.102172	NA			ort008956	95.1373	2.34712	1.58977	1.47638	0.139841	NA			ort008699	22.6899	-3.50734	2.39301	-1.46566	0.14274	0.999867			ort004376	726.799	1.94294	1.3027	1.49146	0.13584	NA			ort011593	15.7227	5.05673	3.34725	1.51071	0.130862	NA			ort006845	606.535	-2.01502	1.30478	-1.54434
ort002825	1095.81	2.45901	1.50523	1.63364	0.102333	0.772897			ort002526	133.912	-2.18959	1.48321	-1.47625	0.139877	NA			ort006622	1013	-1.80848	1.23398	-1.46557	0.142765	0.999867			ort010707	4263.72	1.87314	1.25601	1.49134	0.135873	0.793831			ort001225	150.359	-2.28342	1.51167	-1.51053	0.130907	NA			ort007787	235.636	2.24303	1.45364	1.54305
ort010058	59.5325	3.18677	1.95245	1.63219	0.10264	NA			ort007072	1084.86	-1.78397	1.20877	-1.47586	0.139981	0.963386			ort007743	224.763	-1.98852	1.35692	-1.46547	0.142793	0.999867			ort004702	16085.4	-1.86061	1.24839	-1.49041	0.136118	0.793831			ort007852	26.3994	-3.92045	2.59763	-1.50924	0.131237	NA			ort008483	989.019	-1.94881	1.26299	-1.543
ort000437	1908.52	-2.43365	1.49186	-1.63128	0.10283	0.772897			ort009291	26.8694	3.46414	2.34733	1.47578	0.140004	NA			ort000298	128.257	2.13996	1.46065	1.46507	0.142901	0.999867			ort001205	1421.87	-1.89909	1.27442	-1.49016	0.136181	NA			ort011354	137.41	2.31983	1.53715	1.50917	0.131256	NA			ort010530	27.9232	-4.27123	2.76868	-1.54269
ort000080	10.5246	6.27978	3.85009	1.63107	0.102875	NA			ort009364	554.48	-1.84178	1.24897	-1.47464	0.140311	NA			ort004740	467.402	1.8664	1.27451	1.46441	0.143083	0.999867			ort000295	154.606	2.22292	1.49251	1.48938	0.136387	NA			ort010148	249.943	2.08427	1.38149	1.50871	0.131372	NA			ort005379	634.93	2.0009	1.29744	1.54218
ort004059	10.5246	6.27978	3.85009	1.63107	0.102875	NA			ort010806	10935	-1.72355	1.16883	-1.4746	0.140321	0.963386			ort000593	19032.8	-1.75438	1.1981	-1.46429	0.143113	0.999867			ort005387	1845.24	-1.88784	1.26768	-1.48921	0.136432	NA			ort006548	458.977	-1.94061	1.28646	-1.50849	0.13143	NA			ort005713	1571.52	-1.90795	1.23754	-1.54173
ort005546	492.924	2.50944	1.53863	1.63096	0.102899	0.772897			ort000628	118.497	-2.23867	1.51864	-1.47413	0.140447	NA			ort007327	16395.4	-1.75457	1.19837	-1.46413	0.143159	0.999867			ort000855	35.6013	3.17103	2.12948	1.48911	0.136459	NA			ort008411	771.611	-1.86421	1.23645	-1.50772	0.131627	0.999494			ort006623	8226.07	-1.85325	1.20227	-1.54146
ort008957	118.276	2.81373	1.72526	1.6309	0.102911	NA			ort000327	76.0008	2.4717	1.67757	1.47338	0.140648	NA			ort001219	4306.89	-1.76219	1.20453	-1.46297	0.143475	0.999867			ort005358	173.936	2.18103	1.46629	1.48745	0.136896	NA			ort006784	10.5476	-6.71665	4.45851	-1.50648	0.131944	NA			ort001704	2052.37	-1.89107	1.22718	-1.541
ort010327	375.66	-2.53313	1.55333	-1.63078	0.102937	0.772897			ort003469	4586.84	-1.72943	1.17419	-1.47287	0.140786	0.963386			ort000400	1584.04	-1.78426	1.21966	-1.46291	0.143493	0.999867			ort009314	201.79	2.13813	1.43767	1.48721	0.136958	NA			ort006801	10.5476	-6.71665	4.45851	-1.50648	0.131944	NA			ort000251	747.65	1.97453	1.28177	1.54047
ort010217	38.2538	3.58343	2.19755	1.63065	0.102965	NA			ort005461	503.581	1.84945	1.2558	1.47273	0.140824	NA			ort011482	4252.48	1.76188	1.20444	1.46282	0.143516	0.999867			ort005168	757.153	-1.92659	1.29725	-1.48513	0.137509	NA			ort004840	556.079	-1.90474	1.26442	-1.50641	0.131963	NA			ort002473	131.001	2.50351	1.62567	1.53999
ort001113	20.0881	4.71585	2.89396	1.62955	0.103196	NA			ort001410	258.74	1.96757	1.33654	1.47214	0.140983	NA			ort001836	14.1063	-4.46425	3.05232	-1.46258	0.143583	0.999867			ort004027	1974.18	1.87823	1.26471	1.4851	0.137516	NA			ort000639	17.0545	-4.92042	3.26642	-1.50636	0.131974	NA			ort004816	19.9752	4.72586	3.06887	1.53993
ort008734	152.917	-2.70195	1.65894	-1.62872	0.103373	NA			ort008089	18738.2	1.71462	1.16555	1.47107	0.141272	0.963386			ort004336	14.1063	-4.46425	3.05232	-1.46258	0.143583	0.999867			ort007051	42.2683	2.9838	2.0093	1.485	0.137544	NA			ort003762	1787.29	-1.79608	1.19256	-1.50608	0.132048	0.999494			ort009158	27573.9	-1.84059	1.19556	-1.53952
ort010806	1698.81	-2.43041	1.49296	-1.62792	0.103542	0.772897			ort001703	477.74	-1.85276	1.26033	-1.47006	0.141546	NA			ort006189	2350.62	-1.77166	1.21163	-1.46222	0.143681	0.999867			ort004582	8.85415	6.34295	4.27172	1.48487	0.137578	NA			ort011428	134.771	2.32123	1.54176	1.50557	0.132179	NA			ort007003	72.2562	-2.9559	1.9202	-1.53937
ort002208	500.255	-2.495	1.53355	-1.62694	0.103749	0.772897			ort002499	344.904	1.90274	1.29469	1.46965	0.141657	NA			ort011468	1006.41	1.80023	1.23203	1.46119	0.143964	0.999867			ort011640	8.85415	6.34295	4.27172	1.48487	0.137578	NA			ort000853	199.686	2.15151	1.42959	1.50499	0.132327	NA			ort007652	272.509	2.18603	1.42011	1.53933
ort010647	32.4249	3.77375	2.31958	1.62692	0.103755	NA			ort011115	88.1985	2.37104	1.61464	1.46846	0.141979	NA			ort010739	1988.37	-1.77362	1.21409	-1.46087	0.144051	0.999867			ort000837	13246.6	1.84938	1.24628	1.48393	0.137829	0.793831			ort011468	1408.42	1.80596	1.20058	1.50424	0.132519	0.999494			ort011566	108.764	2.61369	1.6982	1.5391
ort010954	730.164	2.46559	1.51717	1.62513	0.104136	0.772897			ort009929	1156.47	-1.76712	1.20342	-1.46841	0.141992	0.963386			ort007764	245.193	-1.96019	1.34231	-1.46032	0.144203	0.999867			ort005206	2131.51	-1.87329	1.26244	-1.48387	0.137843	NA			ort005736	1750.77	-1.79355	1.19245	-1.50409	0.132558	0.999494			ort000072	10.3114	7.26793	4.72488	1.53823
ort006312	665.174	-2.46748	1.51877	-1.62466	0.104235	0.772897			ort009531	17.131	4.1846	2.85069	1.46793	0.142125	NA			ort011018	153.253	-2.07811	1.42348	-1.45988	0.144324	0.999867			ort005835	74.4071	-2.53294	1.70726	-1.48363	0.137907	NA			ort005667	317.869	2.00819	1.33539	1.50382	0.132626	NA			ort001246	10.3114	7.26793	4.72488	1.53823
ort003241	381.436	-2.51792	1.55051	-1.62393	0.10439	0.772897			ort000844	102.523	2.28918	1.55957	1.46783	0.142151	NA			ort008696	3347.21	1.75978	1.20569	1.45957	0.144409	0.999867			ort010357	530.135	1.95816	1.31993	1.48353	0.137933	NA			ort010749	265.06	2.05679	1.36773	1.50381	0.132632	NA			ort003244	10.3114	7.26793	4.72488	1.53823
ort009131	1617.83	2.42445	1.49364	1.62318	0.104551	0.772897			ort008588	1124.63	-1.76749	1.2043	-1.46765	0.1422	0.963386			ort008245	730.687	1.81702	1.24494	1.45952	0.144421	0.999867			ort003973	7.70825	-6.6349	4.47349	-1.48316	0.138032	NA			ort001779	283.361	2.03793	1.35523	1.50375	0.132645	NA			ort008745	390.277	-2.08977	1.35861	-1.53817
ort007217	31.8313	-3.63154	2.23756	-1.62299	0.104591	NA			ort003656	286.612	-1.93694	1.32016	-1.4672	0.142322	NA			ort002695	643.402	1.8267	1.25163	1.45946	0.144439	0.999867			ort005479	7.70825	-6.6349	4.47349	-1.48316	0.138032	NA			ort003791	13832.3	-1.7464	1.16182	-1.50316	0.132799	0.999494			ort006213	316.336	2.13838	1.39053	1.53782
ort000421	257.18	-2.5728	1.58558	-1.62263	0.104669	0.772897			ort002663	14.8474	-4.67328	3.18593	-1.46685	0.142417	NA			ort008588	472.183	-1.85797	1.27309	-1.45942	0.144449	0.999867			ort011619	7.70825	-6.6349	4.47349	-1.48316	0.138032	NA			ort008881	9.81265	6.86188	4.56639	1.50269	0.132918	NA			ort006444	844.578	-1.95435	1.27173	-1.53676
ort001186	70.4	-3.00281	1.85074	-1.6225	0.104697	NA			ort009346	259.187	1.9554	1.33388	1.46595	0.142662	NA			ort011621	1061.68	1.7943	1.22949	1.45939	0.144459	0.999867			ort005472	2087.38	1.87293	1.26281	1.48314	0.138037	NA			ort009421	203.329	2.13981	1.42412	1.50255	0.132954	NA			ort001195	13.0924	-6.69391	4.3578	-1.53608
ort002418	153.993	-2.68609	1.65599	-1.62205	0.104794	NA			ort011348	2020.95	1.73616	1.18471	1.46548	0.142791	0.963386			ort008531	3220.36	1.76008	1.20606	1.45937	0.144465	0.999867			ort009972	827.082	1.91724	1.29269	1.48314	0.138038	NA			ort007165	432.431	-1.9399	1.29107	-1.50255	0.132954	NA			ort008258	13.0924	-6.69391	4.3578	-1.53608
ort000682	173.248	-2.65304	1.6365	-1.62116	0.104982	NA			ort006523	137.264	-2.15303	1.47102	-1.46363	0.143294	NA			ort005747	209.847	-1.99086	1.36495	-1.45855	0.144688	0.999867			ort003338	255.811	2.06967	1.39683	1.48169	0.138423	NA			ort008819	660.864	-1.87284	1.2465	-1.50249	0.132971	NA			ort010364	13.0924	-6.69391	4.3578	-1.53608
ort011283	958.652	-2.4376	1.50441	-1.62031	0.105167	0.772897			ort000494	196.745	2.02326	1.38275	1.46321	0.14341	NA			ort010346	6.72473	6.48205	4.44651	1.45779	0.1449	0.999867			ort011588	639.778	-1.93249	1.3051	-1.48072	0.138681	NA			ort005096	383.702	1.96087	1.30585	1.50161	0.133199	NA			ort007663	1206.17	-1.91378	1.24738	-1.53425
ort003036	376.455	2.51771	1.55465	1.61948	0.105345	0.772897			ort003581	636.812	-1.80539	1.2341	-1.46292	0.143489	0.963386			ort011591	2054.25	1.76664	1.21202	1.4576	0.144951	0.999867			ort006953	1396.81	-1.882	1.27118	-1.48051	0.138738	NA			ort007712	285.905	-2.03272	1.3537	-1.5016	0.1332	NA			ort011615	158.818	2.38918	1.55727	1.53421
ort006491	247.196	2.58344	1.59568	1.61902	0.105443	0.772897			ort005193	169.1	-2.07274	1.41745	-1.4623	0.143659	NA			ort003119	1981.24	1.7674	1.21265	1.45747	0.144986	0.999867			ort003220	8768.44	-1.8427	1.24594	-1.47896	0.139151	0.793831			ort008893	988.756	1.82728	1.21705	1.5014	0.133252	0.999494			ort000417	5141.43	-1.84677	1.2042	-1.53361
ort000793	265.419	2.56842	1.58728	1.61813	0.105636	0.772897			ort002202	462.439	-1.84326	1.26055	-1.46227	0.143668	NA			ort000333	111.776	-2.18286	1.49844	-1.45675	0.145185	0.999867			ort009393	5848.71	1.84484	1.24807	1.47815	0.139367	0.793831			ort005079	173.695	-2.19843	1.46512	-1.50052	0.13348	NA			ort006818	978.022	1.93012	1.25871	1.53341
ort009933	381.039	-2.50603	1.54907	-1.61776	0.105714	0.772897			ort011138	112.034	2.23354	1.52765	1.46208	0.14372	NA			ort000508	103.87	-9.85068	6.76707	-1.45568	0.145482	0.999867			ort001502	19.6461	-3.86112	2.61538	-1.47631	0.13986	NA			ort011485	85.9768	2.57136	1.71477	1.49954	0.133735	NA			ort000601	98.6966	2.66329	1.73727	1.53303
ort000844	43.0642	3.41904	2.11455	1.61691	0.105898	NA			ort006273	469.476	-1.84063	1.259	-1.46198	0.143747	NA			ort011532	476.787	1.84407	1.26884	1.45336	0.146124	0.999867			ort006693	581.723	-1.92878	1.30856	-1.47397	0.140489	NA			ort004970	105.913	2.43706	1.6257	1.49908	0.133852	NA			ort008819	400.664	-2.07175	1.35206	-1.53229
ort000605	51.4838	-3.18737	1.9715	-1.61672	0.105939	NA			ort010022	612.46	-1.80787	1.2366	-1.46197	0.143749	0.963386			ort004167	765.36	1.80248	1.24041	1.45313	0.146187	0.999867			ort009882	2942.29	1.84755	1.25349	1.47392	0.140504	0.793831			ort003784	1587.27	1.7885	1.19351	1.49852	0.133998	0.999494			ort004546	437.061	2.04818	1.33677	1.53219
ort009898	443.507	-2.48481	1.53807	-1.61554	0.106193	0.772897			ort008985	614.246	1.80567	1.2356	1.46137	0.143914	0.963386			ort010098	357.687	1.87869	1.29312	1.45283	0.14627	0.999867			ort007193	21419.6	-1.82853	1.24103	-1.47339	0.140646	0.793831			ort003895	21.7269	-4.24236	2.83203	-1.498	0.134134	NA			ort007349	2967.81	-1.85889	1.21335	-1.53203
ort010727	73.2847	3.00852	1.86247	1.61534	0.106237	NA			ort009213	330.291	-1.89491	1.29772	-1.46018	0.144241	NA			ort009385	30.1704	3.03951	2.09342	1.45194	0.146519	0.999867			ort006238	16.2597	-4.19231	2.84655	-1.47277	0.140812	NA			ort008157	1298.35	1.79897	1.20124	1.4976	0.134238	0.999494			ort011163	2035.6	-1.87313	1.22344	-1.53104
ort009564	118.369	-2.75441	1.70532	-1.61519	0.106269	NA			ort005530	178.728	2.04687	1.40185	1.46013	0.144255	NA			ort003150	101.826	-9.822	6.76708	-1.45144	0.146658	0.999867			ort009749	16.2597	-4.19231	2.84655	-1.47277	0.140812	NA			ort001685	508.203	-1.89999	1.26954	-1.4966	0.134498	NA			ort003485	260.016	2.18344	1.42626	1.53089
ort010470	241.367	2.57871	1.59734	1.61438	0.106446	NA			ort004934	48.8056	2.76722	1.89548	1.4599	0.144317	NA			ort005096	257.147	1.92605	1.32909	1.44915	0.147297	0.999867			ort000995	2981.71	1.84495	1.25282	1.47264	0.140848	0.793831			ort001405	1013.08	1.8146	1.21315	1.49577	0.134714	0.999494			ort004682	113.292	2.56624	1.677	1.53026
ort002105	255.119	2.56782	1.59075	1.61422	0.10648	0.772897			ort011266	563.757	-1.81349	1.24223	-1.45987	0.144327	0.963386			ort008721	19481.1	1.72819	1.19257	1.44913	0.147301	0.999867			ort007269	118.399	2.2848	1.55226	1.47192	0.141044	NA			ort002199	3224.38	1.75384	1.17292	1.49528	0.134842	0.999494			ort010497	32.4287	3.793	2.48057	1.52908
ort002805	341.764	2.51762	1.56102	1.61281	0.106786	0.772897			ort007737	1096.93	-1.75397	1.20224	-1.45891	0.144589	0.963386			ort005962	69.0734	-2.39972	1.65636	-1.44879	0.147397	0.999867			ort010080	62.8119	-2.60738	1.77273	-1.47083	0.141338	NA			ort007652	487.053	1.90356	1.27311	1.49521	0.13486	NA			ort007155	865.675	-1.93542	1.26625	-1.52846
ort011282	437.35	2.48522	1.54171	1.612	0.106963	0.772897			ort008889	1279.71	1.74388	1.1957	1.45845	0.144716	0.963386			ort000817	846.734	1.78778	1.23422	1.44852	0.147473	0.999867			ort000901	1470.37	1.86201	1.26623	1.47051	0.141423	NA			ort010146	103.274	2.44208	1.63363	1.49488	0.134945	NA			ort001190	2823.32	-1.85387	1.21303	-1.5283
ort011134	158.693	-2.65614	1.64817	-1.61157	0.107055	NA			ort006138	267.512	-1.93577	1.32734	-1.45838	0.144736	NA			ort001711	91.5484	-2.25084	1.55432	-1.44812	0.147584	0.999867			ort009795	192.797	-2.11004	1.43554	-1.46986	0.1416	NA			ort009177	124.76	2.33501	1.56253	1.49438	0.135076	NA			ort004012	15.487	5.37791	3.52007	1.52778
ort003397	504.501	-2.46401	1.52926	-1.61124	0.107128	0.772897			ort011572	68.5021	2.50353	1.71676	1.45828	0.144762	NA			ort000335	898.775	-1.78308	1.23198	-1.44732	0.147807	0.999867			ort007948	262.526	-2.03691	1.38594	-1.4697	0.141643	NA			ort008984	1751.46	1.77416	1.18785	1.4936	0.135281	0.999494			ort010207	979.517	1.91343	1.2549	1.52477
ort005465	148.214	2.69035	1.67115	1.60988	0.107424	NA			ort000211	4213.78	-1.70545	1.16987	-1.45782	0.14489	0.963386			ort004466	129.687	2.09946	1.45081	1.4471	0.147869	0.999867			ort002956	24622.7	-1.82018	1.2391	-1.46896	0.141844	0.793831			ort002634	628.728	-1.86067	1.2467	-1.49248	0.135573	NA			ort000042	846.6	-1.93007	1.26623	-1.52426
ort000593	31134	-2.36944	1.47221	-1.60945	0.107519	0.772897			ort005077	234.231	1.96456	1.34769	1.45772	0.144917	NA			ort005795	7.76983	-6.1104	4.22507	-1.44622	0.148114	0.999867			ort004360	127.89	-2.23973	1.5249	-1.46876	0.141897	NA			ort001457	11222.1	-1.72847	1.15832	-1.49221	0.135643	0.999494			ort010084	618.715	1.96975	1.29235	1.52416
ort001442	26484.4	-2.36896	1.47228	-1.60904	0.107608	0.772897			ort000812	26.3095	3.43097	2.35393	1.45755	0.144964	NA			ort004873	71.7294	-2.37164	1.6401	-1.44603	0.148167	0.999867			ort004246	145.831	2.19839	1.4969	1.46863	0.141933	NA			ort006878	1948.24	1.76655	1.18386	1.4922	0.135646	0.999494			ort008847	734.57	-1.94754	1.27781	-1.52412
ort003252	317.372	2.51962	1.56658	1.60836	0.107756	0.772897			ort011144	31.6819	3.19171	2.19219	1.45595	0.145407	NA			ort002717	96.8605	-2.21987	1.5355	-1.4457	0.14826	0.999867			ort002712	296.797	-2.01009	1.3691	-1.46819	0.142053	NA			ort000978	795.101	1.82808	1.22655	1.49043	0.136112	0.999494			ort008994	581.842	1.97744	1.29828	1.52313
ort001413	30253	-2.36721	1.47195	-1.60821	0.107788	0.772897			ort004738	270.151	1.9268	1.32349	1.45585	0.145435	NA			ort007271	81.7625	2.28704	1.58224	1.44544	0.148334	0.999867			ort010946	23.7034	3.62353	2.46828	1.46804	0.142094	NA			ort001184	41.7425	3.18803	2.13933	1.4902	0.136171	NA			ort011327	40847.3	-1.80911	1.18798	-1.52285
ort003709	255.646	10.8817	6.76664	1.60813	0.107806	0.772897			ort003061	39.1806	2.95891	2.03335	1.45519	0.145616	NA			ort001484	229.616	1.94128	1.34321	1.44525	0.148387	0.999867			ort009919	71.0208	-2.52048	1.71802	-1.46709	0.142353	NA			ort002875	1188.83	1.79156	1.20233	1.49007	0.136206	0.999494			ort008411	624.683	-1.96791	1.29247	-1.52259
ort003962	12.8578	-5.20439	3.23756	-1.6075	0.107944	NA			ort002258	240.368	-1.95537	1.34375	-1.45516	0.145625	NA			ort005639	151.1	2.04679	1.41622	1.44525	0.148387	0.999867			ort001410	599.19	1.9133	1.3046	1.46658	0.142489	NA			ort001696	830.701	-1.82176	1.2233	-1.48922	0.136429	0.999494			ort001033	188.049	2.28566	1.5016	1.52215
ort006589	10.1851	6.23247	3.87778	1.60723	0.108005	NA			ort005266	97.1501	2.28712	1.57243	1.45452	0.145803	NA			ort008523	349.736	1.8671	1.29236	1.44472	0.148535	0.999867			ort005203	472.661	1.93779	1.32192	1.46589	0.142679	NA			ort002295	346.483	-1.95941	1.31605	-1.48885	0.136527	NA			ort000681	21.0533	-4.88874	3.2136	-1.52127
ort009078	325.975	2.5128	1.56375	1.60691	0.108075	0.772897			ort010251	1002.88	-1.75208	1.20465	-1.45444	0.145825	0.963386			ort005691	92.7749	2.22395	1.54039	1.44376	0.148807	0.999867			ort008724	114.855	2.28386	1.55813	1.46577	0.142711	NA			ort006783	198.509	2.11904	1.42351	1.4886	0.136593	NA			ort004432	21.0533	-4.88874	3.2136	-1.52127
ort004296	115.22	2.77052	1.72445	1.60661	0.10814	NA			ort008449	525.283	1.8105	1.24526	1.45391	0.14597	NA			ort006180	209.232	-1.9595	1.35902	-1.44185	0.149345	0.999867			ort002833	74.9315	2.49855	1.70498	1.46544	0.1428	NA			ort008417	365.06	-1.94581	1.3078	-1.48785	0.136791	NA			ort006816	467.025	-2.01166	1.32461	-1.51868
ort009035	1566.62	2.39433	1.49032	1.60659	0.108145	0.772897			ort004935	634.609	1.78896	1.23052	1.45383	0.145994	0.963386			ort004738	239.406	1.92548	1.33584	1.44139	0.149473	0.999867			ort002910	6958.27	-1.81922	1.24184	-1.46494	0.142937	0.793831			ort000631	522.653	-1.87843	1.26273	-1.48759	0.136858	NA			ort006880	544.581	-1.98231	1.30556	-1.51837
ort002119	7.3637	-6.88147	4.28387	-1.60637	0.108193	NA			ort009571	229.419	1.96114	1.34959	1.45314	0.146186	NA			ort001821	1228.52	-1.75622	1.21868	-1.44108	0.149561	0.999867			ort003482	978.105	1.87178	1.27794	1.46469	0.143006	NA			ort006351	200.058	2.11105	1.42051	1.48613	0.137245	NA			ort000188	26.202	4.08845	2.69309	1.51812
ort005670	7.3637	-6.88147	4.28387	-1.60637	0.108193	NA			ort001546	364.147	1.86158	1.28167	1.45246	0.146373	NA			ort000024	35.7676	-2.87932	1.99901	-1.44037	0.149763	0.999867			ort001979	8277.09	-1.81736	1.24079	-1.46468	0.143009	0.793831			ort010650	15.1776	5.00427	3.3675	1.48605	0.137267	NA			ort001066	429.318	-2.02767	1.33582	-1.51792
ort008258	7.3637	-6.88147	4.28387	-1.60637	0.108193	NA			ort003633	7.83906	6.57653	4.52803	1.4524	0.146389	NA			ort008179	545.114	-1.80874	1.2559	-1.4402	0.149812	0.999867			ort011617	796.118	1.88542	1.28733	1.4646	0.14303	NA			ort006413	175.475	2.15907	1.45353	1.4854	0.137437	NA			ort004087	76.1357	2.81802	1.85668	1.51777
ort008699	7.3637	-6.88147	4.28387	-1.60637	0.108193	NA			ort004490	7.83906	6.57653	4.52803	1.4524	0.146389	NA			ort005355	600.583	1.79808	1.24866	1.44	0.149866	0.999867			ort001821	1788.16	-1.84195	1.25838	-1.46375	0.143262	NA			ort008028	250.229	2.03545	1.37067	1.485	0.137543	NA			ort003713	173.453	2.31086	1.52265	1.51766
ort009105	7.3637	-6.88147	4.28387	-1.60637	0.108193	NA			ort004904	7.83906	6.57653	4.52803	1.4524	0.146389	NA			ort007677	85.0258	2.25565	1.56666	1.43979	0.149928	0.999867			ort011257	2281.84	-1.83318	1.25312	-1.46288	0.143499	NA			ort008466	1931.08	-1.75411	1.18133	-1.48487	0.137579	0.999494			ort004224	490.024	1.99655	1.31568	1.5175
ort006347	2942.2	-2.37821	1.48055	-1.6063	0.108207	0.772897			ort007017	7.83906	6.57653	4.52803	1.4524	0.146389	NA			ort010633	2152.16	1.73465	1.20481	1.43976	0.149935	0.999867			ort002567	2825.61	-1.82768	1.24959	-1.46263	0.143568	0.793831			ort011253	89.0746	2.5104	1.69097	1.48459	0.137652	NA			ort001055	12.7287	-6.65327	4.38529	-1.51718
ort006335	71410.4	-2.36129	1.47075	-1.6055	0.108384	0.772897			ort009687	7.83906	6.57653	4.52803	1.4524	0.146389	NA			ort009161	48.0275	-2.61867	1.82078	-1.43821	0.150373	0.999867			ort008022	272.36	2.01709	1.37978	1.4619	0.14377	NA			ort008678	38444.5	-1.709	1.15135	-1.48434	0.137718	0.999494			ort002942	12.7287	-6.65327	4.38529	-1.51718
ort010707	4219.28	2.3714	1.47756	1.60495	0.108506	0.772897			ort010030	7.83906	6.57653	4.52803	1.4524	0.146389	NA			ort001804	121.326	2.10365	1.46322	1.43769	0.150522	0.999867			ort007527	2998.88	1.82378	1.2483	1.46101	0.144014	0.793831			ort005396	1638.22	-1.76	1.18632	-1.48358	0.137921	0.999494			ort001184	42.1325	3.40396	2.24397	1.51694
ort004418	1635.77	-2.38762	1.48808	-1.6045	0.108604	0.772897			ort000742	506.706	1.80881	1.24709	1.45042	0.146943	NA			ort009165	321.396	-1.86885	1.30026	-1.43728	0.150638	0.999867			ort005462	9196.08	1.80924	1.23877	1.46052	0.144148	0.793831			ort011645	471.677	1.88616	1.2717	1.48318	0.138026	NA			ort003623	39.7066	3.47653	2.29193	1.51686
ort011404	515.111	2.45342	1.5294	1.60417	0.108677	0.772897			ort008696	5812.85	1.68837	1.16408	1.45038	0.146951	0.963386			ort007604	77.2766	2.29433	1.59769	1.43603	0.150994	0.999867			ort009460	294.426	-1.99563	1.3668	-1.46007	0.144271	NA			ort008230	3551.25	-1.72985	1.16641	-1.48305	0.13806	0.999494			ort007318	265.922	-2.15328	1.41968	-1.51674
ort007232	224.899	2.57077	1.60335	1.60338	0.108852	NA			ort009842	205.74	-1.98745	1.37053	-1.45013	0.147022	NA			ort002416	206.368	1.94574	1.35563	1.4353	0.151201	0.999867			ort011038	325.538	1.98045	1.35643	1.46004	0.144279	NA			ort007566	434.071	1.9002	1.28152	1.48278	0.138133	NA			ort001616	1196.06	1.87902	1.23944	1.51602
ort007977	19.4091	4.66432	2.90938	1.6032	0.108891	NA			ort006747	367.491	-1.85675	1.2806	-1.44991	0.147085	NA			ort011340	19919.1	-1.7045	1.18774	-1.43508	0.151264	0.999867			ort005757	4632.21	1.81491	1.24305	1.46004	0.144279	0.793831			ort009673	141.971	2.24274	1.51353	1.48179	0.138396	NA			ort008088	93.1573	2.65963	1.75484	1.5156
ort010109	369.665	2.48682	1.55187	1.60247	0.109052	0.772897			ort008392	98.7165	2.26855	1.56473	1.4498	0.147114	NA			ort004870	239.468	-1.91722	1.33607	-1.43497	0.151295	0.999867			ort009123	57.818	-2.6363	1.80568	-1.46	0.144289	NA			ort005197	25.4822	-3.866	2.61015	-1.48114	0.138569	NA			ort004094	77.8743	2.79301	1.84334	1.51519
ort010912	575.972	-2.43346	1.51982	-1.60116	0.109342	0.772897			ort002397	50.9209	-2.71772	1.87531	-1.44921	0.147278	NA			ort000542	27.3161	3.09465	2.15724	1.43454	0.151418	0.999867			ort007236	207.113	2.07498	1.42142	1.45979	0.144348	NA			ort011398	1963.73	-1.74662	1.1793	-1.48107	0.138587	0.999494			ort000296	71.9713	2.85714	1.88585	1.51504
ort001973	346.292	2.49147	1.55678	1.6004	0.10951	0.772897			ort011463	2385.16	1.7034	1.17543	1.44917	0.14729	0.963386			ort008745	77562.8	-1.70154	1.18612	-1.43454	0.151419	0.999867			ort000327	100.084	2.33008	1.597	1.45903	0.144556	NA			ort001931	293.026	1.98304	1.33916	1.48081	0.138657	NA			ort003702	387.651	-2.04492	1.34976	-1.51502
ort011268	228.691	2.56107	1.6004	1.60027	0.109539	NA			ort009590	451.943	-1.82149	1.25767	-1.44831	0.147531	NA			ort009943	193.724	1.95746	1.36532	1.4337	0.151659	0.999867			ort008001	249.745	-2.02243	1.38791	-1.45717	0.145068	NA			ort001033	180.667	2.13643	1.44339	1.48015	0.138833	NA			ort004714	274.894	-2.13878	1.41184	-1.51488
ort005578	598.116	-2.42842	1.51771	-1.60005	0.109586	0.772897			ort005019	137.883	2.11253	1.45989	1.44704	0.147885	NA			ort009508	170.679	1.98867	1.38755	1.43323	0.151794	0.999867			ort008089	1341.94	-1.83976	1.26313	-1.45652	0.14525	NA			ort003415	86.4354	2.5189	1.70207	1.4799	0.1389	NA			ort002318	217.788	-2.21953	1.46533	-1.51469
ort001984	2879.79	-2.36486	1.47904	-1.59892	0.109839	0.772897			ort002356	10523.9	-1.6772	1.15921	-1.44685	0.14794	0.963386			ort002158	393.178	1.83054	1.27723	1.43321	0.151797	0.999867			ort002158	847.953	1.86517	1.28094	1.45609	0.145366	NA			ort009305	194.78	2.10742	1.42414	1.47979	0.13893	NA			ort000589	579.82	1.95999	1.29479	1.51375
ort006153	277.794	-2.51268	1.57167	-1.59873	0.109881	0.772897			ort008466	3564.12	-1.69001	1.16812	-1.44678	0.147958	0.963386			ort002192	81.9446	-2.27137	1.58494	-1.43309	0.151831	0.999867			ort005783	399.27	-1.9379	1.33149	-1.45543	0.145549	NA			ort010642	2872.09	1.72825	1.16866	1.47883	0.139185	0.999494			ort003865	6664.11	-1.80587	1.19309	-1.51361
ort002266	55.1083	-3.09561	1.93641	-1.59864	0.109902	NA			ort008892	746.28	1.76003	1.21707	1.44612	0.148144	0.963386			ort011533	95.4268	2.18777	1.52697	1.43276	0.151928	0.999867			ort007343	1883.6	-1.82378	1.25376	-1.45465	0.145766	NA			ort003893	1471.28	-1.75756	1.18851	-1.4788	0.139194	0.999494			ort010794	263.896	2.14248	1.41552	1.51356
ort007428	173.682	2.61996	1.63971	1.59782	0.110083	NA			ort011379	8.48316	-6.36382	4.40208	-1.44564	0.148279	NA			ort010132	18012.3	-1.70087	1.18714	-1.43275	0.151931	0.999867			ort006933	37.421	-2.97733	2.04719	-1.45435	0.14585	NA			ort011133	174.327	-2.14403	1.45268	-1.47592	0.139965	NA			ort004490	19.2878	4.67339	3.08818	1.51332
ort004453	4638.44	-2.35645	1.47489	-1.59772	0.110106	0.772897			ort002100	14.4009	-4.62748	3.20269	-1.44487	0.148494	NA			ort006111	73.5675	-2.32679	1.62426	-1.43252	0.151994	0.999867			ort003711	2781.71	1.81186	1.24654	1.45352	0.146081	0.793831			ort005703	26322.9	-1.69502	1.14867	-1.47564	0.140042	0.999494			ort004996	19.2878	4.67339	3.08818	1.51332
ort011509	440.843	-2.44893	1.53387	-1.59657	0.110361	0.772897			ort006506	621.851	-1.77594	1.22926	-1.44472	0.148535	0.963386			ort004318	102.565	2.15456	1.50523	1.43138	0.152322	0.999867			ort006961	168.033	2.12001	1.45872	1.45333	0.146131	NA			ort003390	24961.4	-1.69478	1.1487	-1.47539	0.140108	0.999494			ort007244	1243.44	1.86862	1.2358	1.51208
ort006562	59.4692	-3.03898	1.9046	-1.5956	0.110578	NA			ort009242	290.067	1.89055	1.30863	1.44468	0.148548	NA			ort002225	402.968	1.82417	1.27441	1.43138	0.152322	0.999867			ort007493	36318.7	-1.79141	1.23265	-1.4533	0.14614	0.793831			ort003558	212.399	-2.06863	1.40269	-1.47476	0.140278	NA			ort002567	2266.29	-1.83182	1.21206	-1.51132
ort004729	2650.87	-2.35995	1.47912	-1.59551	0.110598	0.772897			ort003562	36.0663	-3.03589	2.10218	-1.44416	0.148693	NA			ort008889	473.532	1.80248	1.26082	1.42961	0.15283	0.999867			ort004874	8.43253	6.27255	4.31844	1.45251	0.146361	NA			ort001418	804.507	1.79712	1.21906	1.47418	0.140432	0.999494			ort009834	2253.03	1.82996	1.21147	1.51053
ort000061	1508.45	-2.37281	1.48742	-1.59526	0.110655	0.772897			ort001405	542.959	1.78849	1.23881	1.44371	0.148819	NA			ort003226	8482.14	1.69752	1.18809	1.42878	0.153067	0.999867			ort010568	8.43253	6.27255	4.31844	1.45251	0.146361	NA			ort001087	26.366	3.74127	2.538	1.4741	0.140454	NA			ort000656	102.082	-2.60201	1.72422	-1.50909
ort000868	118.333	2.73385	1.71461	1.59445	0.110836	NA			ort009161	58.8515	-2.58662	1.79201	-1.44342	0.148903	NA			ort001696	546.948	-1.78705	1.25136	-1.42808	0.153269	0.999867			ort004025	19.0531	-3.81381	2.62699	-1.45178	0.146562	NA			ort006838	247.633	-2.01692	1.36884	-1.47345	0.140629	NA			ort006576	1311.33	-1.86	1.23264	-1.50896
ort004947	17582.9	-2.3428	1.46943	-1.59436	0.110855	0.772897			ort001608	449.71	-1.81232	1.25613	-1.44277	0.149084	NA			ort001386	100.537	-2.16406	1.51625	-1.42724	0.15351	0.999867			ort006466	19.0531	-3.81381	2.62699	-1.45178	0.146562	NA			ort009831	79.063	2.55977	1.7395	1.47156	0.14114	NA			ort001782	1118.55	-1.87277	1.24124	-1.50878
ort004109	388.173	-2.45846	1.54202	-1.59431	0.110866	0.772897			ort008307	56.7508	2.59967	1.80239	1.44235	0.149204	NA			ort004557	59.0606	-2.44374	1.71313	-1.42647	0.153731	0.999867			ort001837	341.495	1.95635	1.34761	1.45171	0.146581	NA			ort004219	144.523	2.21027	1.50276	1.47081	0.141343	NA			ort005965	251.171	-2.1549	1.42854	-1.50846
ort000353	1302.11	2.37373	1.49089	1.59216	0.11135	0.772897			ort008222	16.5711	4.13398	2.8672	1.44182	0.149354	NA			ort005000	974.62	1.74035	1.22062	1.4258	0.153927	0.999867			ort011649	258.604	2.00471	1.38228	1.45029	0.146977	NA			ort009198	225.759	-2.04006	1.38714	-1.47069	0.141375	NA			ort004010	303.922	2.08948	1.38523	1.5084
ort000549	198.959	-2.55934	1.60874	-1.5909	0.111632	NA			ort007665	1471.27	1.70861	1.18509	1.44175	0.149372	0.963386			ort002097	32128.6	-1.68639	1.18353	-1.42488	0.154191	0.999867			ort006456	517.829	1.89556	1.30807	1.44912	0.147303	NA			ort001399	160.73	2.16233	1.47078	1.47019	0.141509	NA			ort008630	2368.5	-1.82353	1.2094	-1.5078
ort002125	2863.47	-2.35007	1.47722	-1.59087	0.111638	0.772897			ort004791	834.545	-1.74213	1.20913	-1.44081	0.149639	0.963386			ort000355	362.182	1.82451	1.2814	1.42384	0.154492	0.999867			ort005696	158.182	-2.12418	1.46604	-1.44893	0.147358	NA			ort002873	608.749	-1.82345	1.24036	-1.4701	0.141536	NA			ort000835	441.022	1.99655	1.32494	1.5069
ort011150	368.181	-2.4578	1.54508	-1.59072	0.111672	0.772897			ort011176	319.795	-1.86525	1.2947	-1.44068	0.149675	NA			ort000561	200.66	1.93003	1.35573	1.42361	0.154559	0.999867			ort005290	377.858	-1.9329	1.3342	-1.44872	0.147414	NA			ort010038	158.636	2.16697	1.47435	1.46978	0.141622	NA			ort011532	471.304	1.98052	1.31558	1.50543
ort004132	567.533	-2.41467	1.51805	-1.59064	0.11169	0.772897			ort009665	119.617	-2.16272	1.50132	-1.44055	0.149712	NA			ort006148	299.124	-1.85437	1.3031	-1.42304	0.154724	0.999867			ort004955	4320.53	1.79507	1.23932	1.44843	0.147496	0.793831			ort005924	1947.88	1.72209	1.17384	1.46705	0.142362	0.999494			ort004600	1324.3	1.84944	1.22949	1.50423
ort002135	99.4312	2.79553	1.75767	1.59048	0.111727	NA			ort007256	190.699	1.98785	1.38004	1.44043	0.149746	NA			ort001430	653.208	1.76055	1.23768	1.42246	0.154892	0.999867			ort011596	169.606	-2.10197	1.45122	-1.44841	0.147501	NA			ort010134	413.961	1.87857	1.28079	1.46673	0.142449	NA			ort008854	1098.02	-1.86524	1.24035	-1.5038
ort006020	85.3394	2.86354	1.8022	1.58892	0.11208	NA			ort007006	477.945	1.79865	1.24872	1.4404	0.149756	NA			ort006742	88.7396	-9.62356	6.76717	-1.42209	0.154999	0.999867			ort008725	371.799	1.93486	1.33678	1.4474	0.147784	NA			ort011006	2585.77	1.70857	1.16576	1.46563	0.142748	0.999494			ort002838	133.143	2.40929	1.60239	1.50357
ort009189	144.477	-2.63522	1.65866	-1.58876	0.112114	NA			ort000542	31.122	3.16314	2.19665	1.43999	0.149871	NA			ort004601	387.267	1.81129	1.27433	1.42137	0.155209	0.999867			ort000914	24.6399	-3.41789	2.36347	-1.44613	0.14814	NA			ort009123	91.6758	-2.45099	1.67236	-1.46558	0.142761	NA			ort000353	2343.03	1.81474	1.2074	1.50301
ort005318	57086.9	-2.32875	1.46673	-1.58772	0.11235	0.772897			ort002380	31.122	3.16314	2.19665	1.43999	0.149871	NA			ort009008	14389	1.68253	1.18375	1.42135	0.155214	0.999867			ort010575	2189.14	-1.80382	1.24746	-1.44599	0.14818	NA			ort000682	196.288	-2.07666	1.41722	-1.46531	0.142837	NA			ort004512	2957.32	1.80536	1.20138	1.50274
ort006653	19.4278	-4.17585	2.63196	-1.58659	0.112605	NA			ort008672	112.133	-2.18991	1.52125	-1.43955	0.149995	NA			ort006937	3048.52	1.69513	1.19318	1.42068	0.155409	0.999867			ort005813	339.186	-1.94342	1.34432	-1.44565	0.148275	NA			ort004125	9.2675	6.77942	4.62845	1.46473	0.142995	NA			ort004055	61.7894	-2.99791	1.99536	-1.50244
ort003408	263.578	-2.49455	1.5737	-1.58515	0.112932	0.772897			ort000748	2177.39	-1.6901	1.17411	-1.43947	0.150017	0.963386			ort010126	591.822	1.76504	1.24263	1.42041	0.155487	0.999867			ort011229	1874.02	-1.80682	1.25026	-1.44515	0.148415	NA			ort008313	9.2675	6.77942	4.62845	1.46473	0.142995	NA			ort005790	1764.59	-1.82835	1.21699	-1.50236
ort002787	242.84	2.51859	1.58906	1.58496	0.112976	NA			ort003439	335.769	-1.85309	1.28771	-1.43906	0.150133	NA			ort004953	584.684	1.76523	1.24319	1.41992	0.155631	0.999867			ort006361	449.88	1.90383	1.31774	1.44477	0.148523	NA			ort010532	9.2675	6.77942	4.62845	1.46473	0.142995	NA			ort010957	7348.75	-1.78373	1.18762	-1.50194
ort003383	16.1428	-4.50927	2.84537	-1.58478	0.113017	NA			ort006737	6243.69	-1.66806	1.15951	-1.43858	0.150268	0.963386			ort010911	23999.9	-1.67768	1.18204	-1.41931	0.15581	0.999867			ort009601	475.508	-1.89483	1.31182	-1.44443	0.148618	NA			ort010716	50.6638	2.90654	1.98612	1.46343	0.143351	NA			ort006413	74.7609	2.78796	1.85749	1.50092
ort000789	1256.49	2.36118	1.48999	1.5847	0.113035	0.772897			ort010957	8494.62	-1.66399	1.15724	-1.4379	0.150463	0.963386			ort010085	496.581	1.77898	1.25363	1.41906	0.155882	0.999867			ort002157	61.0331	-2.55902	1.77225	-1.44394	0.148756	NA			ort005203	779.119	1.78068	1.21693	1.46325	0.143398	0.999494			ort002320	650.712	-1.91867	1.27915	-1.49996
ort001592	9.8456	6.18356	3.90718	1.58261	0.113509	NA			ort010848	19.8172	3.78606	2.63326	1.43778	0.150496	NA			ort004834	650.323	-1.75601	1.23759	-1.4189	0.15593	0.999867			ort007259	160.944	2.11177	1.46343	1.44303	0.149011	NA			ort000092	2349.2	-1.70779	1.16721	-1.46314	0.14343	0.999494			ort001464	198.884	2.21345	1.4762	1.49942
ort004816	9.8456	6.18356	3.90718	1.58261	0.113509	NA			ort007804	407.598	-1.81613	1.26406	-1.43674	0.150791	NA			ort006755	225.745	1.8946	1.33569	1.41845	0.156061	0.999867			ort005420	379.294	-1.92032	1.33132	-1.44241	0.149186	NA			ort005655	277.737	-1.963	1.34196	-1.46278	0.143527	NA			ort003326	27220.4	-1.76894	1.17978	-1.49938
ort009753	831.049	-2.37333	1.50002	-1.5822	0.113605	0.772897			ort003435	388.831	-1.82322	1.26917	-1.43655	0.150846	NA			ort000666	611.3	-1.75944	1.24082	-1.41796	0.156203	0.999867			ort007994	93.2756	-2.31588	1.60562	-1.44236	0.149202	NA			ort008072	505.207	1.8364	1.25547	1.46271	0.143546	NA			ort006524	696.865	1.90419	1.27064	1.49861
ort001311	388.003	2.43983	1.54286	1.58137	0.113794	0.772897			ort009413	691.561	-1.75027	1.2188	-1.43606	0.150985	0.963386			ort010268	83.1917	2.21752	1.56438	1.41751	0.156335	0.999867			ort005684	18.8942	3.90037	2.70471	1.44206	0.149285	NA			ort005909	371.622	1.89195	1.29366	1.46248	0.143609	NA			ort008591	12.365	-6.61145	4.41397	-1.49785
ort008373	225.091	10.698	6.76667	1.58099	0.113881	NA			ort002612	633.361	-1.75883	1.22481	-1.436	0.151003	0.963386			ort010173	1579.9	-1.70378	1.20323	-1.416	0.156775	0.999867			ort011099	18.8942	3.90037	2.70471	1.44206	0.149285	NA			ort009919	131.124	-2.24088	1.53248	-1.46226	0.143671	NA			ort003207	217.021	-2.18224	1.45809	-1.49664
ort007399	30.3586	-3.55754	2.25185	-1.57983	0.114145	NA			ort000626	396.033	1.81785	1.26601	1.43589	0.151034	NA			ort000883	2493.2	1.68933	1.19393	1.41493	0.157089	0.999867			ort010205	1938.66	-1.79971	1.24826	-1.44177	0.149366	NA			ort007626	96.4349	-2.4108	1.64879	-1.46217	0.143696	NA			ort000204	5593.13	1.77749	1.1881	1.49607
ort010419	51.3271	3.1631	2.00237	1.57967	0.114182	NA			ort004730	168.99	2.0167	1.40462	1.43576	0.15107	NA			ort003404	207.595	1.90471	1.34667	1.41438	0.15725	0.999867			ort003961	909.774	-1.83263	1.27147	-1.44135	0.149485	NA			ort000107	83.6201	-2.50311	1.71222	-1.46191	0.143765	NA			ort011354	52.2	3.09911	2.07268	1.49522
ort000065	302.769	-2.4619	1.55873	-1.57943	0.114238	0.772897			ort011392	35.9345	2.98961	2.08326	1.43507	0.151268	NA			ort004304	566.332	1.75811	1.24316	1.41423	0.157295	0.999867			ort010648	164.612	-2.09624	1.45437	-1.44133	0.14949	NA			ort002242	84.8	2.48647	1.70128	1.46153	0.14387	NA			ort000323	278.047	-2.08845	1.39957	-1.49221
ort007168	373.911	2.4403	1.54523	1.57925	0.114278	0.772897			ort003233	957.426	1.72131	1.1996	1.4349	0.151315	0.963386			ort003611	26.7048	3.05813	2.16248	1.41417	0.157311	0.999867			ort000595	987.328	1.82764	1.2684	1.44091	0.149611	NA			ort001379	2221.27	1.70656	1.16783	1.46131	0.143932	0.999494			ort002803	9.62394	7.16839	4.80555	1.49169
ort000327	56.1375	3.09244	1.959	1.57858	0.114432	NA			ort005174	4576.9	-1.66466	1.16078	-1.43409	0.151545	0.963386			ort011336	122.144	2.05303	1.45197	1.41396	0.157373	0.999867			ort009493	120.006	2.20851	1.53397	1.43974	0.149942	NA			ort001977	59.4529	-2.76337	1.89207	-1.4605	0.144152	NA			ort008076	9.62394	7.16839	4.80555	1.49169
ort006375	531.852	-2.39676	1.5185	-1.57837	0.114481	0.772897			ort011183	202.615	-1.95974	1.36697	-1.43364	0.151676	NA			ort009353	1088.55	-1.71381	1.21285	-1.41305	0.15764	0.999867			ort011253	43.2828	2.83	1.96669	1.43897	0.15016	NA			ort002379	458.839	-1.84772	1.26575	-1.45979	0.144348	NA			ort010969	9.62394	7.16839	4.80555	1.49169
ort007461	156.534	2.60546	1.65208	1.57708	0.114778	NA			ort003723	99.163	2.23107	1.55626	1.43362	0.151682	NA			ort000860	107.868	2.09611	1.48371	1.41274	0.157732	0.999867			ort006341	3715.32	-1.7802	1.23717	-1.43893	0.150171	0.793831			ort009400	12631.7	-1.67017	1.14472	-1.45901	0.144562	0.999494			ort009261	103.497	-2.54682	1.70848	-1.49069
ort003243	220.677	10.6695	6.76667	1.57676	0.11485	NA			ort009543	221.382	-1.93417	1.34975	-1.43299	0.151861	NA			ort003963	66.6197	-2.33743	1.65471	-1.41259	0.157776	0.999867			ort003072	413.08	1.90273	1.32286	1.43834	0.150336	NA			ort008683	77.9727	2.53632	1.73906	1.45844	0.144718	NA			ort011113	484.81	-1.95002	1.30814	-1.49069
ort003839	24.8985	3.9915	2.53213	1.57634	0.114947	NA			ort007694	324.194	1.84624	1.28865	1.4327	0.151945	NA			ort005530	284.686	1.83996	1.30286	1.41225	0.157877	0.999867			ort009311	263.335	1.97623	1.37457	1.4377	0.150518	NA			ort006300	2182.26	-1.70223	1.16726	-1.45831	0.144755	0.999494			ort002654	2478.79	1.78984	1.20094	1.49037
ort007300	18.7301	4.61088	2.92589	1.57589	0.115052	NA			ort010906	42.8733	2.80777	1.96075	1.43199	0.152148	NA			ort010707	995.228	1.71575	1.21509	1.41204	0.157939	0.999867			ort004010	205.176	2.03164	1.41359	1.43722	0.150656	NA			ort002473	356.418	1.89154	1.29767	1.45765	0.144938	NA			ort000348	265.115	-2.09863	1.40856	-1.48992
ort000756	801.202	-2.36333	1.4998	-1.57576	0.11508	0.772897			ort010724	905.056	1.72014	1.20131	1.43188	0.152178	0.963386			ort003280	31.4758	-2.92239	2.07131	-1.41089	0.158277	0.999867			ort006219	75.5244	2.42455	1.6876	1.43669	0.150807	NA			ort009716	14472.3	-1.66516	1.14318	-1.4566	0.145226	0.999494			ort007791	625.585	1.90256	1.27719	1.48965
ort010427	378.261	-2.424	1.53923	-1.57482	0.115299	0.772897			ort006516	25.9033	-3.40124	2.37711	-1.43083	0.15248	NA			ort007647	31.4758	-2.92239	2.07131	-1.41089	0.158277	0.999867			ort009141	229.769	-1.99985	1.39206	-1.43661	0.150828	NA			ort007808	4389.7	1.67897	1.15271	1.45655	0.145241	0.999494			ort005995	86.2399	-2.67345	1.795	-1.48939
ort008466	1250.25	-2.34108	1.48662	-1.57477	0.11531	0.772897			ort004452	1855.24	-1.68019	1.17472	-1.43029	0.152634	0.963386			ort002366	7.36089	-6.03239	4.27908	-1.40974	0.158616	0.999867			ort003053	490.397	-1.87621	1.30622	-1.43637	0.150897	NA			ort008501	1257.12	1.7269	1.18603	1.45604	0.145382	0.999494			ort007322	473.486	1.94786	1.30821	1.48895
ort002362	138.311	2.63788	1.67511	1.57475	0.115313	NA			ort007293	323.707	-1.84326	1.28895	-1.43005	0.152704	NA			ort004851	7.36089	-6.03239	4.27908	-1.40974	0.158616	0.999867			ort009961	755.084	-1.83063	1.27725	-1.43325	0.151785	NA			ort008646	64.3183	2.67393	1.83746	1.45523	0.145605	NA			ort001411	896.751	1.85503	1.24637	1.48835
ort011028	455.464	2.40912	1.52987	1.57472	0.115322	0.772897			ort001873	317.815	1.84494	1.29026	1.42991	0.152744	NA			ort005526	7.36089	-6.03239	4.27908	-1.40974	0.158616	0.999867			ort006700	1409.95	-1.79521	1.25275	-1.43302	0.151854	NA			ort010757	5699.05	-1.67205	1.14906	-1.45514	0.145631	0.999494			ort007256	266.766	2.08388	1.40165	1.48674
ort006374	534.242	2.39352	1.52014	1.57454	0.115363	0.772897			ort011559	783.646	1.72789	1.20842	1.42987	0.152753	0.963386			ort008445	7.36089	-6.03239	4.27908	-1.40974	0.158616	0.999867			ort007941	861.957	-1.82086	1.27068	-1.43298	0.151863	NA			ort003813	801.723	-1.76128	1.21143	-1.45388	0.145979	0.999494			ort001800	79.289	2.70442	1.81905	1.48672
ort000972	199.638	-2.52579	1.60419	-1.5745	0.115372	NA			ort009476	115.932	-2.15333	1.50641	-1.42944	0.152878	NA			ort009359	7.36089	-6.03239	4.27908	-1.40974	0.158616	0.999867			ort000799	172.65	-2.06465	1.44103	-1.43276	0.151926	NA			ort007051	75.3336	2.54712	1.75311	1.45292	0.146247	NA			ort011337	38.3317	3.42103	2.30119	1.48664
ort000322	521.997	-2.38537	1.51789	-1.5715	0.116065	0.772897			ort005835	65.8891	-2.46919	1.7281	-1.42885	0.153048	NA			ort011379	7.36089	-6.03239	4.27908	-1.40974	0.158616	0.999867			ort006042	26.8404	-3.26449	2.27953	-1.43209	0.152118	NA			ort004559	376.015	-1.87202	1.28862	-1.45273	0.1463	NA			ort002471	129.362	-2.39855	1.61427	-1.48584
ort003138	414.546	2.41289	1.53552	1.57138	0.116094	0.772897			ort008905	2327.83	1.66949	1.16876	1.42843	0.153168	0.963386			ort006978	96.856	2.13189	1.51292	1.40912	0.158799	0.999867			ort006034	659.312	1.83829	1.28469	1.43093	0.152451	NA			ort005687	1246.64	-1.7218	1.18529	-1.45264	0.146323	0.999494			ort005667	251.807	2.09944	1.41336	1.48543
ort011168	866.84	-2.3487	1.49578	-1.57021	0.116366	0.772897			ort005747	304.494	-1.85139	1.29651	-1.42798	0.153298	NA			ort001128	182.258	-1.92923	1.36963	-1.40857	0.158962	0.999867			ort001067	349.081	-1.91006	1.3352	-1.43054	0.152562	NA			ort006366	1157.87	1.72622	1.18854	1.45239	0.146393	0.999494			ort009795	229.914	-2.13567	1.43853	-1.48463
ort006988	155.176	2.59082	1.65145	1.56881	0.116691	NA			ort009154	304.494	-1.85139	1.29651	-1.42798	0.153298	NA			ort003367	723.254	-1.7302	1.22834	-1.40857	0.158964	0.999867			ort002291	7.11531	-6.51942	4.5592	-1.42995	0.152732	NA			ort010233	406.416	1.8543	1.27704	1.45203	0.146493	NA			ort010976	1056.84	-1.83268	1.23487	-1.4841
ort004791	1007.29	-2.3377	1.49068	-1.56821	0.116832	0.772897			ort004899	6237.64	1.64995	1.15573	1.42763	0.153398	0.963386			ort001186	55.1777	-2.44543	1.73621	-1.40849	0.158987	0.999867			ort002942	7.11531	-6.51942	4.5592	-1.42995	0.152732	NA			ort010705	530.484	-1.80945	1.24633	-1.45182	0.146552	NA			ort011315	1180.85	1.82167	1.2275	1.48405
ort008651	55.4585	3.07282	1.9605	1.56736	0.11703	NA			ort002231	748.202	-1.72701	1.2105	-1.4267	0.153667	0.963386			ort002659	19.3646	3.43805	2.44154	1.40815	0.159087	0.999867			ort004511	7.11531	-6.51942	4.5592	-1.42995	0.152732	NA			ort007893	2654.24	1.68364	1.15974	1.45175	0.146572	0.999494			ort008349	51.5126	3.07774	2.07488	1.48333
ort007567	105.996	2.71722	1.73384	1.56717	0.117076	NA			ort009304	80.5864	2.32665	1.63149	1.42609	0.153843	NA			ort007264	1069.06	1.70386	1.21088	1.40713	0.15939	0.999867			ort005295	3118.58	1.76607	1.23576	1.42914	0.152965	0.793831			ort004308	191.423	2.05425	1.41554	1.45121	0.146721	NA			ort001509	187.441	2.20234	1.48492	1.48314
ort005817	280.567	-2.4479	1.5628	-1.56636	0.117264	0.772897			ort001564	10860.6	-1.64066	1.15153	-1.42476	0.154227	0.963386			ort009830	82.1966	-9.51307	6.76723	-1.40576	0.159797	0.999867			ort009400	13049.4	-1.75099	1.22551	-1.42878	0.153067	0.793831			ort008316	534.177	1.80628	1.2448	1.45106	0.146764	NA			ort001025	132.231	-2.37991	1.60471	-1.48308
ort008494	35.5378	3.46795	2.21521	1.56552	0.117462	NA			ort010633	1886.05	1.67013	1.17222	1.42476	0.154227	0.963386			ort006147	1152.29	-1.69829	1.20836	-1.40545	0.159887	0.999867			ort004717	538.436	1.85181	1.2969	1.42788	0.153328	NA			ort003963	160.682	-2.12401	1.46388	-1.45095	0.146795	NA			ort004920	5183.78	-1.75556	1.18409	-1.48262
ort010578	217.761	-2.48862	1.59049	-1.56468	0.117657	NA			ort004121	117.831	-2.13613	1.49938	-1.42468	0.15425	NA			ort000904	16584.7	-1.65533	1.178	-1.40521	0.15996	0.999867			ort001873	685.651	1.82887	1.2811	1.42758	0.153412	NA			ort001322	1374.56	-1.71089	1.1799	-1.45003	0.147049	0.999494			ort011241	357.342	-1.99939	1.34893	-1.4822
ort003028	827.118	2.34243	1.49769	1.56403	0.117811	0.772897			ort009194	268.131	1.87001	1.31271	1.42454	0.15429	NA			ort002347	138.46	1.99247	1.41891	1.40423	0.16025	0.999867			ort003249	553.799	1.84837	1.29476	1.42757	0.153416	NA			ort007786	1799.53	-1.69486	1.16948	-1.44924	0.147271	0.999494			ort007164	27.9405	3.84452	2.59381	1.48219
ort008114	51458.8	-2.28378	1.46111	-1.56304	0.118043	0.772897			ort009198	105.655	-2.18579	1.53451	-1.42442	0.154324	NA			ort002860	808.827	1.71419	1.22076	1.40419	0.160261	0.999867			ort002137	118.745	-2.17704	1.52602	-1.42662	0.153691	NA			ort002568	3148.73	-1.67424	1.1553	-1.44918	0.147288	0.999494			ort011068	609.978	1.89196	1.27663	1.482
[truncated: 9,543 more rows]
[truncated: 9 more columns]
